# Supplementary material for: Engineered Enzymes Enable Selective N‐Alkylation of Pyrazoles With Simple Haloalkanes
Source: PubMed Central journal article supplement (PMC7986378; doi:10.1002/anie.202014239), 2021-01-21
Supplement: ANIE-60-5554-s001.pdf [file ANIE-60-5554-s001.pdf]

## Supporting Information

### **Engineered Enzymes Enable Selective *N*-Alkylation of Pyrazoles With Simple Haloalkanes**

*Ludwig L. Bengel, Benjamin Aberle, Alexander-N. Egler-Kemmerer, Samuel Kienzle, Bernhard Hauer, and Stephan C. Hammer\**

anie\_202014239\_sm\_miscellaneous\_information.pdf

**This PDF file includes:**

|                                                                                                 |     |
|-------------------------------------------------------------------------------------------------|-----|
| I. Materials and methods .....                                                                  | 2   |
| II. General procedures.....                                                                     | 7   |
| III. Supporting figures .....                                                                   | 12  |
| IV. Calibration curves for initial rate measurements, enzymatic ethylation and propylation...51 |     |
| V. Chemical synthesis of product standards.....                                                 | 55  |
| VI. NMR spectra of product standards.....                                                       | 59  |
| VII. NMR analysis of enzymatic scale-up methylation of 3-cyclopropylpyrazole (3) .....          | 80  |
| VIII. HR-ESI-MS analysis of product standards. ....                                             | 82  |
| IX. Enzyme sequences.....                                                                       | 97  |
| X. References .....                                                                             | 109 |

## Supporting Information

### I. Materials and methods

(A) All chemicals and solvents, as not described otherwise, were purchased from commercial suppliers (Sigma Aldrich, Abcr, Alfa Aesar, Apollo Scientific, Fisher Scientific, Enamine, Fluorochem) and used without additional purification. S-adenosyl-L-methionine disulfat tosylat was purchased from Abcr (cat-#: AB436584), S-adenosyl-L-homocysteine was purchased from Sigma-Aldrich (cat-#: A9384), Lysozyme was purchased from Roth® (cat-#: 8259.3) and DNaseI from Gold Biotechnology® (cat-#: D-300-5).

(B) All NMR spectra were recorded on a Bruker 500 MHz instrument in CDCl<sub>3</sub> and referenced to tetramethylsilane. Data for <sup>1</sup>H NMR are reported in the conventional form: chemical shift (δ ppm), multiplicity (d = doublet, dd = doublet of doublets, t = triplet, q = quartet, m = multiplet), coupling constant (Hz), integration. Data for <sup>13</sup>C NMR are reported in terms of chemical shift. The correct assignment of the chemical shifts was confirmed by two-dimensional correlation measurements, including heteronuclear single quantum coherence (HSQC), heteronuclear multiple bond coherence (HMBC) and homonuclear correlation spectroscopy (COSY).

(C) High resolution mass spectra were measured using electrospray ionization in positive mode on a microTOFQ Bruker Daltonics, LC-coupled with an Agilent 1200 series. Scan started from 50 m/z and ended at 1500 m/z. Capillary was set at 4500 V, End Plate Offset at -500 V, Collision Cell RF at 180.0 Vpp, Nubilizer at 0.4 bar, Dry heater at 200°C, Dry gas at 4.0 l/min.

(D) Gas chromatography (GC) was performed either with flame ionization detection (FID) or mass detection (MS). 2-methylpyridine (in ddH<sub>2</sub>O) was used as internal standard for the substrate screening and endpoint measurements; p-xylene (in DMSO) was used as internal standard for initial rates measurements of enzymatic reactions.

*GC-MS analyses of the 24-DWPs screening* was conducted; as not otherwise described; with a Shimadzu GC2010 instrument equipped with a Shimadzu QP2010 mass spectrometer using a Phenomenex ZB-5MSi column (30 m x 0.25 mm, 0.25 μm film, part number 7HG-G018-11) with helium as carrier gas and pressure (26.7 kPa) as control mode. Injector temperature: 250°C. Split mode with a split ratio of 10 at 1 μl injection. Ion source temperature: 200°C, Interface temperature: 280°C.

*GC-FID analyses for endpoint and initial rates measurements* were conducted; as not otherwise described; with a Shimadzu GC2010 Plus instrument using an Agilent J&W DB-

WAX column (30 m x 0.25 mm, 0.25 µm film, part number 122-7032) with hydrogen as carrier gas and linear velocity (41 cm/s) as flow control mode. Injector temperature: 250°C. Split mode with a split ratio of 15 at 1 µl injection. Detector temperature: 260°C.

*GC-FID analyses for the measurement of selectivities of chemical syntheses* were conducted; as not otherwise described; with a Shimadzu GC2010 Plus instrument using a Phenomenex ZB-5 column (30 m x 0.25 mm, 0.25 µm film, part number 7HK-G002-28) with hydrogen as carrier gas and linear velocity (41 cm/s) as flow control mode. Injector temperature: 250°C. Split mode with a split ratio of 50 at 1 µl injection. Detector temperature: 315°C.

### **1) 3-methylpyrazole (1), 1,3-dimethylpyrazole (1a), 1,5-dimethylpyrazole (1b)**

*GC-FID analyses of screening, endpoint measurements and selectivity of chemical synthesis:* GC-FID analyses were conducted with a Shimadzu GC2010 Plus instrument using an Agilent J&W DB-WAX column (30 m x 0.25 mm, 0.25 µm film, part number 122-7032) with hydrogen as carrier gas and linear velocity (33.1 cm/s) as flow control mode. Injector temperature: 200°C. Split mode with a split ratio of 15 at 1 µl injection. Detector temperature: 260°C. Oven temperature: 120°C, uphold 1 min, 17.5°C/min to 140°C, 40°C/min to 230°C uphold 3 min.

*GC-FID analyses of initial rates measurements:* Oven temperature: 110°C uphold 2 min, 17.5°C/min to 135°C, 40°C/min to 230°C uphold 3 min.

### **2) 3,4-dimethylpyrazole (2), 1,3,4-trimethylpyrazole (2a), 1,4,5-trimethylpyrazole (2b)**

*GC-MS analyses of 24-DWP screening:* Oven temperature: 60°C uphold 4 min, 15°C/min to 85°C, 25°C/min to 170°C, 50°C/min to 320°C uphold 3 min. SIM mode with 93 m/z, 95 m/z and 109 m/z.

*GC-FID analyses of endpoint and initial rates measurements:* Oven temperature: 110°C uphold 2 min, 25°C/min to 120°C, 50°C/min to 230°C, uphold 2 min.

*GC-FID analyses of selectivity measurement of chemical synthesis:* Oven temperature: 85°C, uphold 2 min, 25°C/min to 120°C, 15°C/min to 140°C.

### **3) 3-cyclopropylpyrazole (3), 1-methyl-3-cyclopropylpyrazole (3a), 1-methyl-5-cyclopropyl-pyrazole (3b)**

*GC-MS analyses of 24-DWP screening:* Oven temperature: 110°C, uphold 2 min, 50°C/min to 280°C, uphold 2 min. SIM mode with 93 m/z, 108 m/z and 122 m/z.

*GC-FID analyses of endpoint measurements:* Oven temperature: 110°C, uphold 2 min, 25°C/min to 120°C, uphold 3.5 min, 50°C/min to 230°C, uphold 2 min.

*GC-FID analyses of Initial rates measurement:* Oven temperature: 110°C, uphold 3 min, 25°C/min to 135°C, uphold 3 min, 50°C/min to 230°C, uphold 2.5 min.

*GC-FID analyses of selectivity measurement of chemical synthesis:* Oven temperature: 110°C, uphold, 2 min, 50°C/min to 280°C, uphold 2 min.

#### **4) 3-cyclopropylpyrazole (3), 1-ethyl-3-cyclopropylpyrazole (7a), 1-ethyl-5-cyclopropylpyrazole (7b)**

*GC-FID analyses of endpoint measurements and of selectivity measurement of chemical synthesis:* Oven temperature: 110°C, uphold 3 min, 25°C/min to 135°C, uphold 3 min, 50°C/min to 230°C, uphold 2.5 min. Internal standard was p-xylene.

#### **5) 3-cyclopropylpyrazole (3), 1-propyl-3-cyclopropylpyrazole (8a), 1-propyl-5-cyclopropyl-pyrazole (8b)**

*GC-MS analyses of endpoint measurements:* GC-MS analyses were conducted with an Agilent 8860 GC instrument equipped with an Agilent 5977B mass spectrometer using an Agilent DB-HeavyWAX column (25 m x 0.25 mm, 0.20 µm film, part number 122-7127) with helium as carrier gas and constant pressure as control mode. Split mode with a split ratio of 40 at 1 µl injection. Oven temperature: 80°C, uphold 2.25 min, 40°C/min to 270°C, uphold 3 min. Internal standard was p-xylene.

*GC-FID analyses of selectivity measurement of chemical synthesis:* Oven temperature: 110°C, uphold 3 min, 25°C/min to 135°C, uphold 3 min, 50°C/min to 230°C, uphold 2.5 min.

#### **6) 3(2-furyl)pyrazole (4), 1-methyl-3(2-furyl)pyrazole (4a), 1-methyl-5(2-furyl)pyrazole (4b)**

*GC-MS analyses of 24-DWP screening:* Oven temperature: 110°C, uphold 2 min, 50°C/min to 280°C, uphold 2 min. SIM mode with 93 m/z, 134 m/z and 148 m/z.

*GC-FID analyses of endpoint measurements:* Oven temperature: 100°C, uphold 2.25 min, 50°C/min to 230°C, uphold 4.5 min.

*GC-FID analyses of initial rates measurement:* Oven temperature: 100°C, uphold 2.25 min, 50°C/min to 230°C, uphold 6.5 min.

*GC-FID analyses of selectivity measurement of chemical synthesis:* Oven temperature: 110°C, uphold 2 min, 50°C/min to 280°C, uphold 2 min.

**7) 3(2-fluorophenyl)pyrazole (5), 1-methyl-3(2-fluorophenyl)pyrazole (5a), 1-methyl-5(2-fluorophenyl)-pyrazole (5b)**

*GC-MS analyses of 24-DWP screening:* Oven temperature: 110°C, uphold 2 min, 50°C/min to 280°C, uphold for 2 min. SIM mode with 93 m/z, 162 m/z and 176 m/z.

*GC-FID analyses of endpoint measurements:* Oven temperature: 100°C, uphold 2.25 min, 50°C/min to 230°C, uphold 6 min.

*GC-FID analyses of initial rates measurement:* Oven temperature: 100°C, uphold 2.25 min, 50°C/min to 230°C, uphold 9 min.

*GC-FID analyses of selectivity measurement of chemical synthesis:* Oven temperature: 110°C, uphold 2 min, 50°C/min to 280°C, uphold 2 min.

**8) 3-methyl-4-phenylpyrazole (6), 1,3-dimethyl-4-phenylpyrazole (6a), 1,5-dimethyl-4-phenylpyrazole (6b)**

*GC-MS analyses of 24-DWP screening:* Oven temperature: 110°C, uphold 2 min, 50°C/min to 280°C, uphold 2 min. SIM mode with 93 m/z, 158 m/z and 172 m/z.

*GC-FID analyses of endpoint measurements:* Oven temperature: 100°C, uphold 2.25 min, 50°C/min to 230°C, uphold 8 min.

*GC-FID analyses of initial rates measurement:* Oven temperature: 100°C, uphold 2.25 min, 50°C/min to 230°C, uphold 12.75 min.

*GC-FID analyses of selectivity measurement of chemical synthesis:* Oven temperature: 110°C, uphold 2 min, 50°C/min to 280°C, uphold 2 min.

**(E) Liquid chromatography (LC) Analysis**

*Detection and quantification of SAH, SAM and alkyl SAM analogs.* High pressure liquid chromatography (HPLC) analyses were conducted with an Agilent 1200 series instrument equipped with a diode-array detector using a Phenomenex Luna® 5 µm SCX 100 Å (100 x 4.6 mm, part number 00D-4398-E0) with buffer A (20 mM KP<sub>i</sub> pH 2.5, 25% (v/v) ACN) and buffer B (20 mM KP<sub>i</sub> pH 2.5, 25% (v/v) ACN, 400 mM potassium chloride) and detection at 260 nm. Column temperature: 40°C at a flow rate of 0.5 ml/min with 4 µl injection. Gradient: 10% B, 8 min to 90% B, uphold 2 min, 4 min to 10% B, up hold for 3 min.

*Mass detection of SAH, SAM and alkyl SAM analogs.* Liquid chromatography mass spectroscopy (LC/MS) analyses were conducted with an Agilent 1260 infinity instrument

equipped with a quadrupole LC/MS 6130 detector using a Merck KGaA ZIC®-pHILIC column (50 x 4.6 mm, part number 1.50463.0001) with buffer A (90% ACN, 20 mM ammonium formate, pH 2.8) and buffer B (10% ACN, 20 mM ammonium formate, pH 2.8) and detection at 260 nm via DAD and 250-600 m/z in positive mode via MS-detector. Flow rate of 1 ml/min with 40 µl injection. Gradient: 20% B, uphold 1 min, 11 min to 75% B, 2 min to 100% B, uphold 2 min, 4 min to 20% B, uphold 10 min.

## II. General procedures

### (A) Cloning of wtNMT, FuncLib variants and HMTs:

*Homo sapiens* nicotinamide *N*-methyltransferase (wtNMT, UniProtKB: P40261) was codon optimized for *E. coli* (<https://eu.idtdna.com>), ordered at Invitrogen (Thermo Fischer Scientific, California, USA) and inserted into pET28 a(+) plasmid, containing a C-terminal His<sub>6</sub>-tag with a LE-linker, by Gibson Assembly<sup>[1]</sup>. The plasmid was transformed into *E. coli* strain BL21 (DE3) via heat shock transformation.

FuncLib variants were constructed by Gibson Assembly, overlap extension PCR<sup>[2]</sup> and QuikChange-PCR with the template of pET28 a(+):wtNMT. 300 bp Gibson Assembly fragments that cover the mutations L164X, D167X, D197X, A198X, S201X, Y204X, S213X, Y242X, A247X and N249X were ordered at TWIST Bioscience (California, USA). Single mutations at Y20 and Y24 were performed by overlap extension PCR; double mutations for this position were done by QuikChange-PCR. The plasmid were transformed into *E. coli* strain BL21 (DE3) via heat shock transformation.

NSA-synthase *Aspergillus clavatus* halide methyl transferase (*ac*HMT, UniProtKB: A1CIS5), *Chloracidobacterium thermophilum* HMT (*cth*HMT, UniProtKB: G2LF24), *Arabidopsis thaliana* HMT (*ath*HMT, UniProtKB: Q6AWU6), *Batis maritima* HMT (*bma*HMT, UniProtKB: Q7ZSZ7), *Burkholderia xenovorans* (*bxe*HMT, NCBI: WP\_011486779) and *Synechococcus elongatus* (*sel*HMT, UniProtKB: Q31S13), were codon optimized for *E. coli* (<https://eu.idtdna.com>), ordered at TWIST Bioscience (California, USA) and inserted into a pBAD33 vector containing a C-terminal His<sub>6</sub>-tag with a LE-linker, by Gibson Assembly. The plasmids were transformed into the SAHN-knockout *E. coli* strain JW0155 (Keio-collection<sup>[3]</sup>) via heat shock transformation.

### (B) Creation of FuncLib library:

Analysis of crystal structures of wtNMT (PDB: 2iip, 3rod, 5yif, 6b1a, 6chh) showed no structural difference in the active site of wtNMT crystals, even with different substrates bound. We identified the residues of the substrate-binding pocket 5 Å around the bound inhibitor in 5yjf and excluded residues that interact with SAM or SAH. We picked 12 amino acid residues (Y20, Y24, L164, D167, D197, A198, S201, Y204, S213, Y242, A247, and N249) for the FuncLib<sup>[4]</sup> application (<http://funclib.weizmann.ac.il/bin/steps>).

The library was created using PDB code of wtNMT 2iip, chain A with SAH as ligand (4001A) to keep. We used min ID 0.3, max targets 3000, coverage 0.6 and E value of 0.0001 resulting in 473.294 designs in step 1. For energy calculations and clustering, we set up the parameters: minimal number of mutations per design = 3, maximal number of mutations per



design = 5, minimal PSSM threshold = -1,  $\Delta\Delta G$  = 5.5 and difference between clustered variants = 3.

**(C) Expression for 24-deep well plate (DWP) screening:**

Overnight cultures in 24 DWPs with 4 ml/well TB media and 30 mg/l kanamycin were inoculated with single colonies from LB agar plates with the same concentration of kanamycin and incubated at 37°C. Main cultures were inoculated with 400  $\mu$ l of the overnight culture using 24 DWPs with 3.4 ml/well TB media (with 30 mg/l kanamycin) and incubated for 4 h at 37°C and 180 rpm shaking. Each plate had controls of 2x wtNMT, 1x empty vector and 1 well only with media. After cooling the plates in an ice bath for 15 min, the expression was started by induction with 1 mM IPTG for 20 h, 25°C and 180 rpm. The cells were harvested at 3220 x g, 4°C for 10 min and frozen and stored at -20°C for at least 1 night.

**(D) Expression of wtNMT and FuncLib variants for enzyme purification:**

Overnight cultures in 5 ml LB media with 30 mg/l kanamycin were inoculated either from single colonies on LB agar plates or from glycerol stocks that were stored at -80°C and incubated at 37°C. Main cultures in 400 ml autoinduction media (12 g/l tryptone, 24 g/l yeast extract, 11.1 g/l glycerol, 2.9 g/l D-(+)-glucose, 7.6 g/l  $\alpha$ -lactose, 1% TB-salts), containing 30 mg/l kanamycin, were inoculated with the overnight cultures to a starting concentration of 1% (v/v) and the expression was started by autoinduction. The cultures were incubated for 24 h at 37°C and 180 rpm. The cells were harvested at 10.000 x g at 4°C for 10 min and used directly or were frozen and stored at -20°C.

**(E) Expression of HMTs for screening and enzyme purification:**

Overnight cultures in 5 ml LB media with 50 mg/l chloramphenicol were inoculated either from single colonies on LB agar plates or from glycerol stocks that were stored at -80°C and incubated at 37°C. Main cultures in 400 ml TB media, containing 50 mg/l chloramphenicol, were inoculated with the overnight cultures to a starting concentration of 1% (v/v) and incubated at 37°C, 180 rpm for 3 h. After cooling the cultures in an ice bath for 15 min, the expression was started by induction with 100 mM L-arabinose for 20 h at 25°C and 180 rpm. The cells were harvested at 10.000 x g at 4°C for 10 min and used directly or were frozen and stored at -20°C.

**(F) Enzyme purification of wtNMT and FuncLib variants:**

Frozen cells were resuspended and homogenized in 3 ml/g<sub>cww</sub> Lysis buffer (50 mM KPi, 10 mM imidazole, 500 mM NaCl, 5% glycerol, pH 7.6) and disrupted at 4°C and 800 bar with an Emulsiflex-C5 (Avestin Inc.). Soluble fraction was obtained after centrifugation (4°C, 55.000 x g, 1 h) and filtered through 0.2  $\mu$ m. Enzyme purification was conducted at 4°C with and

Äkta™ Purifier (GE-healthcare) and a Histrap HP 5 ml column (GE-healthcare), loaded with Ni<sup>2+</sup>. The purification was followed by UV/Vis-detector at 280 nm. The column was equilibrated with lysis buffer for 2 column volumes (cv) at 5 ml/min flow. Lysate was loaded and washed from the column for 20 cv. First washing step was 10% elution buffer (50 mM KP<sub>i</sub>, 500 mM imidazole, 500 mM NaCl, 5% glycerol, pH 7.6) for 12 cv and elution was at 50% elution buffer for 7 cv followed by a wash out with 100% elution buffer for 5 cv and reequilibration with lysis buffer for 3 cv. Enzyme containing fractions were detected by SDS-PAGE and pooled and dialyzed with an dialysis bag (6-8 kDa cutoff) in dialysis buffer (50 mM KP<sub>i</sub>, 5% glycerol, pH 7.6) over night and 2x 3 h the next day. Protein concentration was measured via Micro BCA™-Assay (Thermo Scientific, Prod.-# 23225) and aliquots of the enzyme were frozen and stored at -80°C.

**(G) Enzyme purification of NSA-synthase (ac/HMT):**

Frozen cells were resuspended and homogenized in 3 ml/g<sub>cww</sub> lysis buffer (50 mM KP<sub>i</sub>, 10 mM imidazole, 500 mM NaCl, 5% glycerol, pH 7.6) and disrupted at 4°C and 800 bar with an Emulsiflex-C5 (Avestin Inc.). Soluble fraction was obtained after centrifugation (4°C, 55.000 x g, 1 h) and filtered through 0.2 µm. Enzyme purification was conducted at 4°C with an Äkta™ Purifier (GE-healthcare) and a Histrap HP 5 ml column loaded with Ni<sup>2+</sup>. The purification was followed by UV/Vis-detector at 280 nm. The column was equilibrated with lysis buffer for 2 cv at 5 ml/min flow. Lysate was loaded and washed from the column for 20 cv. First washing step was 6% elution buffer (50 mM KP<sub>i</sub>, 500 mM imidazole, 500 mM NaCl, 5% glycerol, pH 7.6) for 7 cv, second washing step at 13% elution buffer for 7 cv and elution was at 25% elution buffer for 7 cv followed by a wash out with 100% elution buffer for 5 cv and reequilibration with lysis buffer for 3 cv. Enzyme containing fractions were pooled and dialyzed with an dialysis bag (6-8 kDa cutoff) in dialysis buffer (50 mM KP<sub>i</sub>, 5% glycerol, pH 7.6) over night and 2x 3 h the next day. Protein concentration was measured via Micro BCA™-Assay and aliquots of the enzyme were frozen and stored at -80°C.

**(H) Biotransformations for 24 deep well plate screening:**

Frozen cells were unfrozen and lysed with 500 µl/well lysis buffer containing 50 mM KP<sub>i</sub>, pH 7.0, 1 mg/mL lysozyme and 0.2 mg/mL DNase1 for 1 h at 37°C and 180 rpm. The lysate was centrifuged at 4°C with 3320 x g for 15 min to receive the soluble supernatant. 500 µl biotransformations were performed in 1.5 ml reaction tubes (Sarstedt, Germany) with 400 µl lysate, 2 mM of corresponding pyrazole (**1-6**), 2 mM SAM disulfate tosylate and 1% (v/v) DMSO for 20 h at 37°C and 180 rpm in an Infors Multitron Pro. Extraction was performed with 500 µl DCM and 2-methylpyridine was added as internal standard for GC-MS measurement.

**(I) Biotransformations for endpoint measurements:**

Frozen enzymes were unfrozen rapidly and 500 µl biotransformations were performed in 1.5 ml reaction tubes (Sarstedt, Germany) with 50 µM of purified enzyme, 2 mM of corresponding pyrazole (**1-6**), 4 mM SAM disulfate tosylate and 1% (v/v) DMSO for 20 h at 37°C and 180 rpm. Extraction was performed with 500 µl DCM and 2-methylpyridine was added as internal standard for GC-FID measurement.

**(J) Biotransformations for initial rates measurements:**

Frozen enzymes were unfrozen rapidly at 37°C and 500 µl biotransformations were performed in 1.5 ml reaction tubes (Sarstedt, Germany) with 50 µM of purified enzyme, 2 mM of corresponding pyrazole (**1-6**), 2 mM SAM disulfate tosylate and 1% (v/v) DMSO at 37°C and 550 rpm in an Eppendorf Thermomixer. The reaction mixtures were prewarmed at 37°C and started by the addition of SAM. The reactions were stopped by the addition of 500 µl DCM and mixing for 40 s. p-xylene was added as internal standard for GC-FID measurement. Slopes of initial rates are calculated by Microsoft Excel.

**(K) Biotransformations for the enzymatic generation of alkyl SAM analogs:**

500 µl biotransformations were performed in 1.5 ml reaction tubes (Sarstedt, Germany) with 50 µM of purified NSA-synthase *ac/HMT*, 10 mM of corresponding haloalkane, 1 mM SAH and 1% (v/v) DMSO at 25°C and 550 rpm for 20 h in an Eppendorf Thermomixer. The reaction was stopped by the addition of 100 µl 32% HCl and 200 µl ACN and mixing for 40 s. After centrifugation, the soluble fraction was transferred to HPLC and LC-MS measurements.

**(L) Biotransformations for the enzymatic cascade for the alkylation of 3-cyclopropylpyrazole (**3**):**

500 µl biotransformations were performed in 1.5 ml reaction tubes (Sarstedt, Germany) with 50 µM of purified variant v36 and NSA-synthase respectively, 2 mM of **3**, 20 mM haloalkane and 1% (v/v) DMSO at, as not otherwise described, 37°C and 550 rpm for 30 h to 72 h in an Eppendorf Thermomixer. The reaction was stopped by the addition of 500 µl DCM and mixing for 40 s. p-xylene was added as internal standard for GC-FID or GC-MS measurement.

**(M) Scale-up biotransformation for the enzymatic cascade for the methylation of 3-cyclopropylpyrazole (**3**):**

500 ml biotransformation (1000x scale-up) was performed in 1 l Schott® bottle with 50 µM of purified variant v36 and NSA-synthase *ac/HMT* respectively, 2 mM of **3**, 20 mM iodomethane at 37°C and 150 rpm for 30 h in an Infors Aquatron. 3 samples (500 µl) were taken at the end

of the reaction and extracted with 500  $\mu$ l DCM to measure the GC-yield with p-xylene as internal standard. The remaining reaction was extracted 4 times with 250 ml DCM, dried with magnesium sulfate and evaporated carefully with a rotary evaporator under reduced pressure. The products were purified from the educt with a silica M60 column with DCM: ethyl acetate (4:1) and followed by TLC with vanilla staining and GC-FID. Fractions containing the product and fractions containing the educt were pooled and evaporated carefully with a rotary evaporator and analyzed by NMR.

**(O) General protocol for chemical synthesis of alkylated pyrazoles:**

The synthesis was performed based on the previous described protocol.<sup>[5]</sup> The pyrazole-educt **1-6** (1 equivalent) was dissolved in dry THF at 0°C under moderate stirring. 1 equivalent of NaH and 1.5 equivalents of haloalkane was added at room temperature and after 24 h, the reaction was quenched with ddH<sub>2</sub>O and extracted 2-4 times with DCM. A sample of the crude product was taken for measurement of the chemical selectivity via GC-FID. The crude extract was dried using magnesium sulfate and evaporated using a rotary evaporator under reduced pressure. The remaining crude extract was purified by column chromatography using silica gel M60 and mixtures of ethyl acetate and cyclohexane as solvent. The purification was followed by thin layer chromatography and visualized by fluorescence at 254 nm, vanilla staining or by GC-FID. The purity of the collected fractions was always determined by GC-FID. The pure fractions were combined and dried at the rotary evaporator until all solvent was evaporated. The samples were characterized by NMR. Identified structures were further confirmed by high-resolution mass analysis.

### III. Supporting figures

**Figure S1:** Chemical methylation and alkylation of pyrazoles generates product mixtures

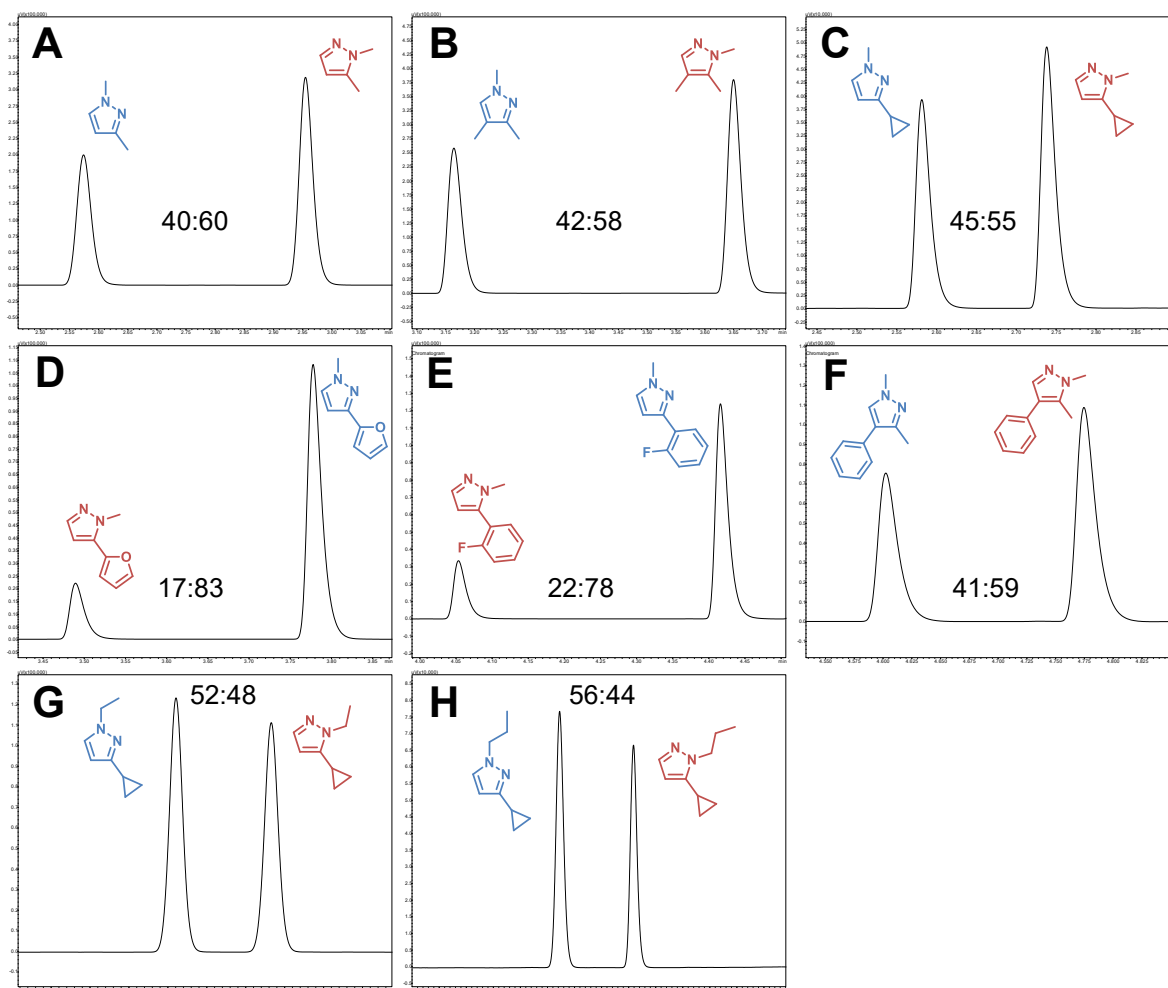

The chemical alkylation of pyrazoles **1-6** with the protocol described in **II.(O)** results in all cases in product mixtures that are often challenging to separate.

**Figure S2:** Examples of important bioactive pyrazoles

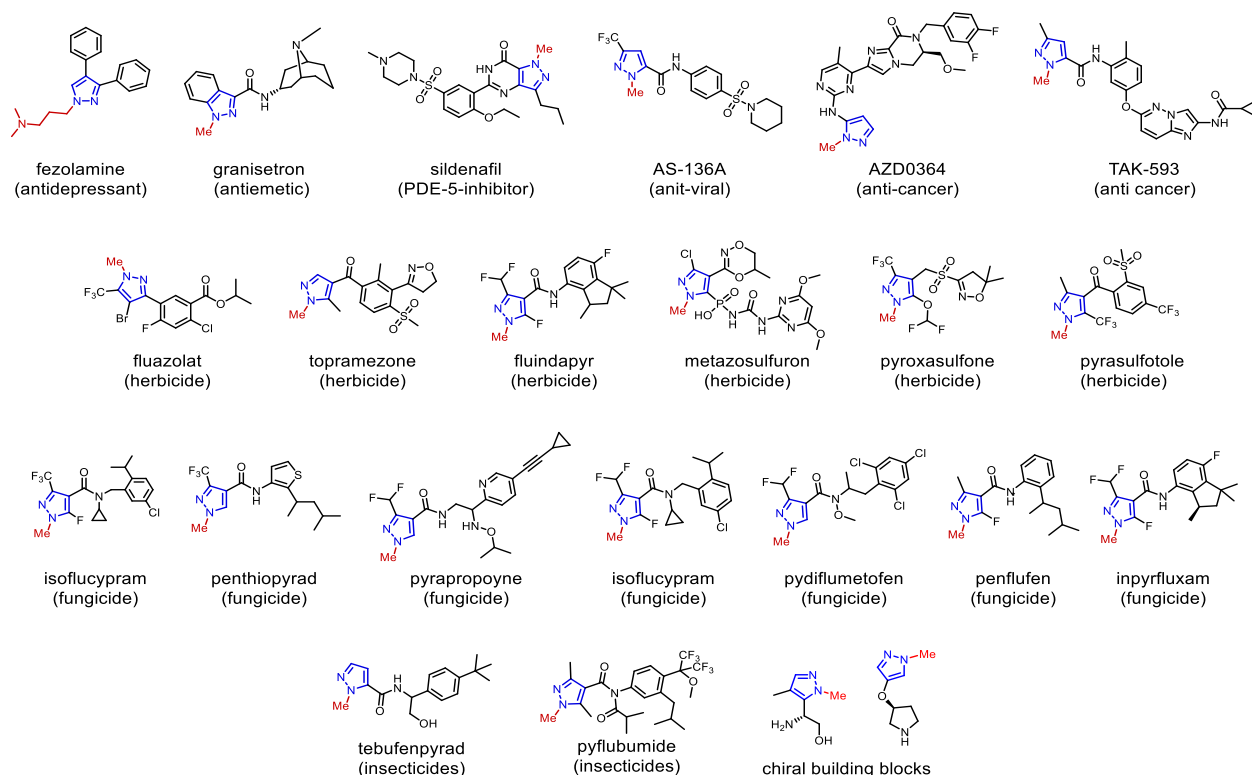

Methylated and alkylated pyrazoles are important active agents in pharmacy and agrochemistry. Besides pharmaceutical activities (antiemetic, anti viral, anti-cancer,...), these compounds also function as herbicides, fungicides and insecticides. The alkylation pattern often implements enormous effects on potency as well half-life and even change the bioactivity of these compounds.<sup>[6]</sup> Here, mostly *N*-methylated pyrazoles are displayed, but similar figures can as well be generated using *N*-alkylated pyrazoles.

**Figure S3:** Typical strategies to form C-heteroatom bonds in nature depend on complex leaving groups

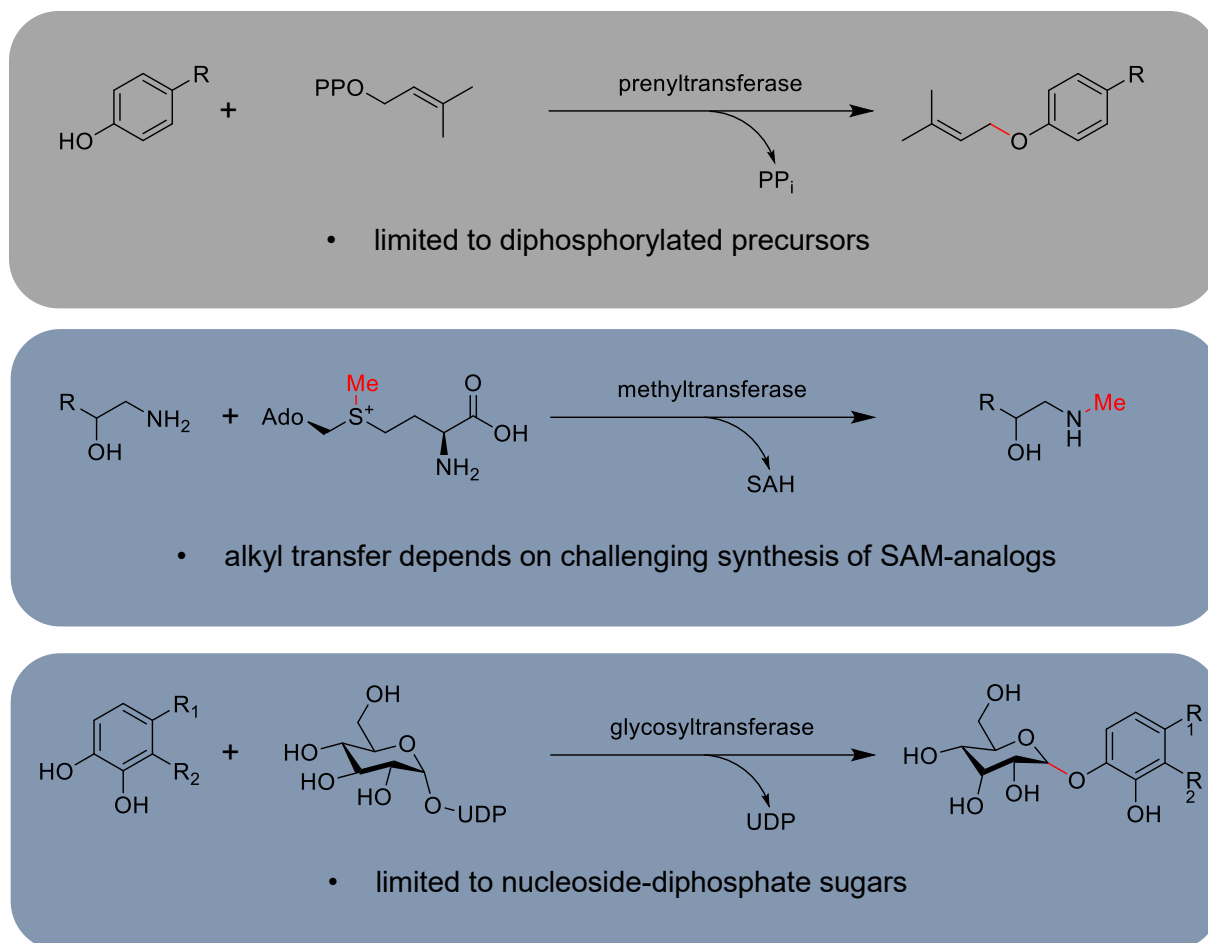

Natural alkylating enzymes to form C-heteroatom bonds can be divided in 3 major classes: prenyltransferases, methyltransferases and glycosyltransferases.<sup>[7-13]</sup> These enzymes are limited to specific alkyl precursors that are often unstable and challenging to access via synthesis. Further, the corresponding leaving groups (diphosphate, SAH or nucleoside-derivatives) lead to low atom economy.

**Figure S4:** Methods for enzymatic and chemoenzymatic NSA synthesis

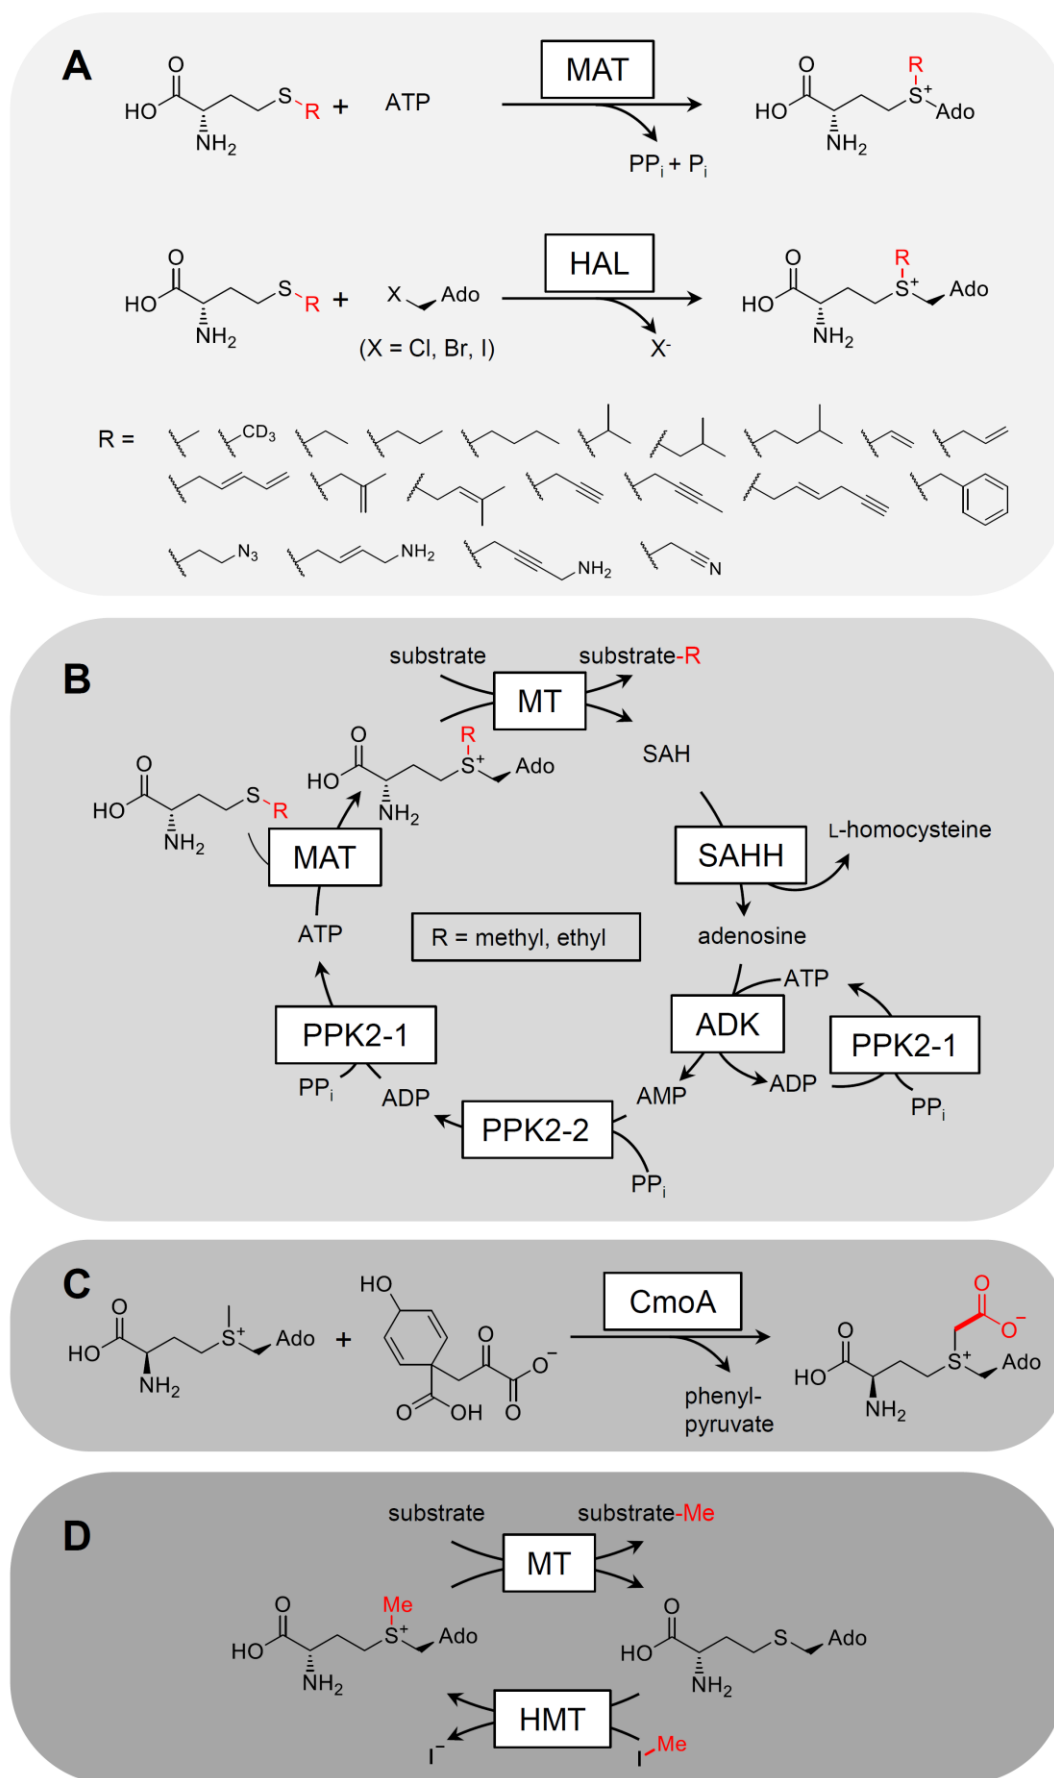



Systems for chemoenzymatic and enzymatic production of non-natural *S*-adenosyl-L-methionine (SAM) analogs (NSAs). **A)** Engineered methionine-adenosyl-transferases (MAT) and halogenases (HAL) are capable of synthesizing various functionalized alkyl- and aryl-analogs of SAM.<sup>[14,15]</sup> Both approaches depend on chemical synthesis of L-methionine analogs. **B)** Mordhorst & Andexer et al.<sup>[16]</sup> published in 2017 the first system for the recycling of SAM, where SAM is recycled under the stoichiometric use of L-methionine and L-ethionine but catalytic amounts of ATP. After transfer of the methyl group derived from SAM by a methyl transferase (MT) onto a substrate, the resulting *S*-adenosyl-L-homocysteine (SAH) is depleted by *S*-adenosyl-L-homocysteine-hydrolase (SAHH) into L-homocysteine and adenosine. Adenosine is further recycled by the kinases PPK2-1 and PPK2-2 to ATP that can be reloaded with L-methionine to achieve SAM by MAT. In this case the SAM-analogs are produced by MAT (as described in **A**), therefore, this approach also depends on the chemical synthesis of L-methionine analogs. **C)** Herbert & Micklefield et al.<sup>[17]</sup> published recently an approach of using carboxyl-SAM-synthase (CmoA) for loading the carboxyl group of prephenate onto SAM that could further be applied to *O*- and *N*-methyltransferases. **D)** Liao & Seebeck et al.<sup>[18]</sup> published a system for the recycling of SAM with the benefit of using methyl iodide as a simple methyl source.

**Figure S5:** Active site of wtNMT and chosen amino acid residues for computational library design

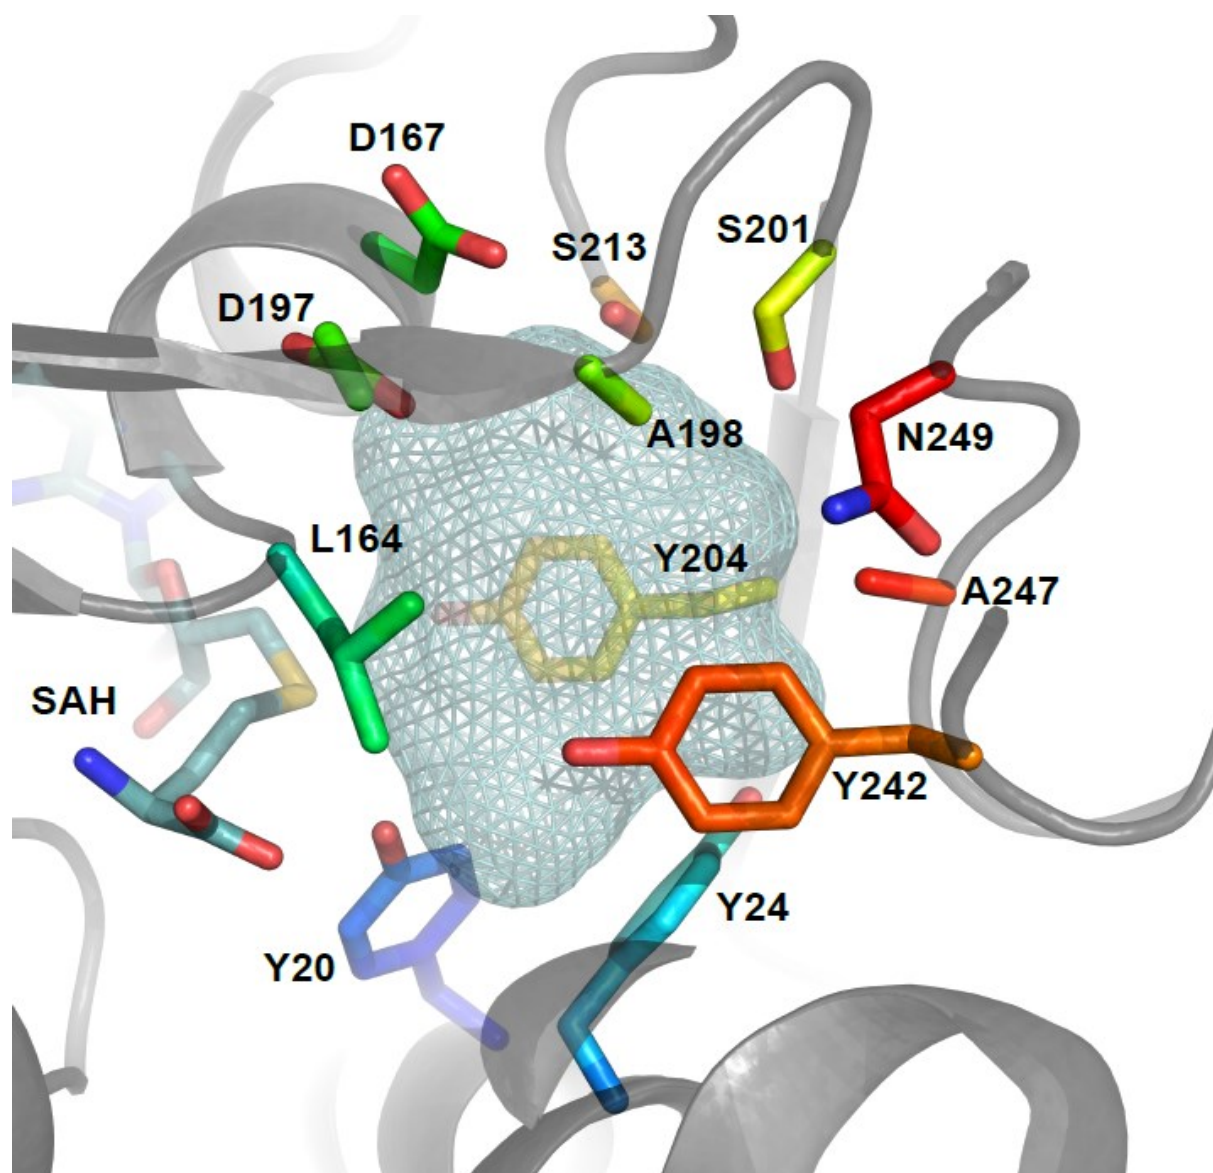

Active site of wtNMT (pdb-file 2iip) with SAH and chosen amino acid residues with substrate interactions for multiple point mutations. We identified the residues of the substrate-binding pocket 5 Å around the bound inhibitor in 5yjf and excluded residues that interact with SAM or SAH. We picked 12 amino acid residues (Y20, Y24, L164, D167, D197, A198, S201, Y204, S213, Y242, A247, and N249) for the FuncLib<sup>[4]</sup> application. Please see general protocols **B** for details.

**Figure S6:** Top 50 variants of FuncLib library

| #  | active site amino acid positions |    |     |     |     |     |     |     |     |     |     |     |
|----|----------------------------------|----|-----|-----|-----|-----|-----|-----|-----|-----|-----|-----|
|    | 20                               | 24 | 164 | 167 | 197 | 198 | 201 | 204 | 213 | 242 | 247 | 249 |
| wt | Y                                | Y  | L   | D   | D   | A   | S   | Y   | S   | Y   | A   | N   |
| 1  | H                                | Y  | L   | C   | D   | M   | A   | Y   | A   | Y   | A   | N   |
| 2  | Y                                | Y  | L   | H   | D   | M   | C   | Y   | A   | Y   | A   | C   |
| 3  | Y                                | Y  | L   | H   | D   | S   | R   | Y   | S   | W   | A   | S   |
| 4  | F                                | Y  | L   | H   | D   | M   | C   | Y   | C   | Y   | A   | N   |
| 5  | Y                                | Y  | L   | H   | D   | M   | A   | Y   | A   | F   | A   | N   |
| 6  | Y                                | Y  | L   | H   | D   | T   | C   | Y   | A   | Y   | M   | N   |
| 7  | Y                                | Y  | L   | H   | D   | A   | Q   | Y   | A   | W   | A   | A   |
| 8  | Y                                | Y  | L   | D   | G   | M   | C   | Y   | A   | Y   | A   | N   |
| 9  | Y                                | Y  | L   | C   | D   | T   | N   | Y   | A   | F   | A   | N   |
| 10 | Y                                | Y  | L   | H   | D   | M   | A   | Y   | H   | Y   | A   | A   |
| 11 | Y                                | Y  | L   | C   | D   | L   | C   | Y   | A   | Y   | A   | A   |
| 12 | F                                | Y  | L   | D   | G   | T   | R   | Y   | S   | Y   | A   | N   |
| 13 | F                                | Y  | L   | H   | D   | A   | Q   | Y   | S   | Y   | A   | S   |
| 14 | F                                | Y  | L   | H   | D   | L   | A   | Y   | A   | Y   | A   | N   |
| 15 | Y                                | Y  | L   | H   | D   | A   | T   | Y   | H   | F   | A   | S   |
| 16 | Y                                | Y  | L   | H   | D   | A   | N   | Y   | A   | Y   | M   | A   |
| 17 | Y                                | Y  | L   | C   | D   | T   | Q   | Y   | A   | Y   | S   | N   |
| 18 | Y                                | F  | L   | C   | D   | A   | R   | Y   | S   | W   | A   | A   |
| 19 | H                                | Y  | L   | H   | D   | A   | Q   | Y   | S   | W   | A   | C   |
| 20 | Y                                | Y  | L   | D   | G   | M   | A   | Y   | S   | F   | A   | A   |
| 21 | Y                                | F  | L   | H   | D   | A   | E   | Y   | A   | Y   | A   | A   |
| 22 | Y                                | Y  | L   | H   | D   | A   | A   | Y   | H   | Y   | M   | C   |
| 23 | Y                                | Y  | L   | D   | G   | T   | S   | Y   | A   | W   | A   | A   |
| 24 | Y                                | F  | L   | H   | D   | A   | Q   | Y   | A   | F   | A   | N   |
| 25 | Y                                | F  | L   | H   | D   | M   | S   | Y   | A   | Y   | A   | N   |
| 26 | Y                                | Y  | L   | H   | D   | T   | Q   | Y   | S   | Y   | A   | N   |
| 27 | Y                                | Y  | L   | C   | D   | S   | S   | Y   | A   | W   | A   | A   |
| 28 | Y                                | Y  | L   | H   | D   | A   | C   | Y   | M   | Y   | A   | A   |
| 29 | Y                                | Y  | L   | C   | D   | A   | T   | Y   | A   | F   | A   | A   |
| 30 | Y                                | Y  | L   | C   | D   | A   | Q   | Y   | S   | W   | A   | S   |
| 31 | Y                                | Y  | L   | H   | D   | M   | C   | Y   | S   | F   | A   | S   |
| 32 | Y                                | F  | L   | H   | D   | A   | Q   | Y   | S   | Y   | A   | C   |
| 33 | Y                                | Y  | L   | C   | D   | M   | C   | Y   | C   | F   | A   | N   |
| 34 | Y                                | Y  | L   | H   | D   | A   | E   | Y   | A   | F   | A   | C   |
| 35 | Y                                | Y  | L   | D   | G   | L   | A   | Y   | A   | F   | A   | N   |
| 36 | Y                                | F  | L   | C   | D   | T   | C   | Y   | A   | Y   | A   | N   |
| 37 | Y                                | Y  | L   | H   | D   | T   | E   | Y   | A   | W   | A   | N   |
| 38 | F                                | Y  | L   | C   | D   | A   | M   | Y   | S   | F   | A   | A   |
| 39 | F                                | Y  | L   | H   | D   | M   | S   | Y   | A   | Y   | A   | A   |
| 40 | Y                                | Y  | L   | H   | D   | L   | A   | Y   | C   | Y   | A   | C   |
| 41 | F                                | Y  | L   | H   | D   | A   | R   | Y   | S   | W   | A   | A   |
| 42 | H                                | Y  | L   | H   | D   | M   | A   | Y   | S   | Y   | A   | C   |
| 43 | Y                                | Y  | L   | C   | D   | M   | T   | Y   | T   | Y   | A   | N   |
| 44 | Y                                | Y  | L   | H   | D   | M   | C   | F   | H   | Y   | A   | N   |
| 45 | F                                | Y  | L   | H   | D   | M   | S   | Y   | S   | F   | A   | C   |
| 46 | Y                                | Y  | L   | D   | G   | M   | S   | Y   | A   | F   | C   | N   |
| 47 | Y                                | Y  | L   | E   | G   | A   | N   | Y   | A   | F   | A   | N   |
| 48 | F                                | Y  | L   | C   | D   | M   | C   | Y   | S   | Y   | A   | C   |
| 49 | Y                                | Y  | L   | C   | D   | A   | C   | Y   | H   | W   | A   | A   |
| 50 | H                                | F  | L   | H   | D   | A   | R   | Y   | S   | Y   | A   | N   |

The top 50 FuncLib variants (v1-v50) and their active site amino acids (AAs) in comparison to the wtNMT. Introduced mutations for each design are marked in red. All variants bearing 3-5 active site mutations and differ in at least 3 residues. Variants are ranked by calculated  $\Delta\Delta G$ .

**Figure S7:** Mean standard deviation (CV) of the 24 deep well plate screening

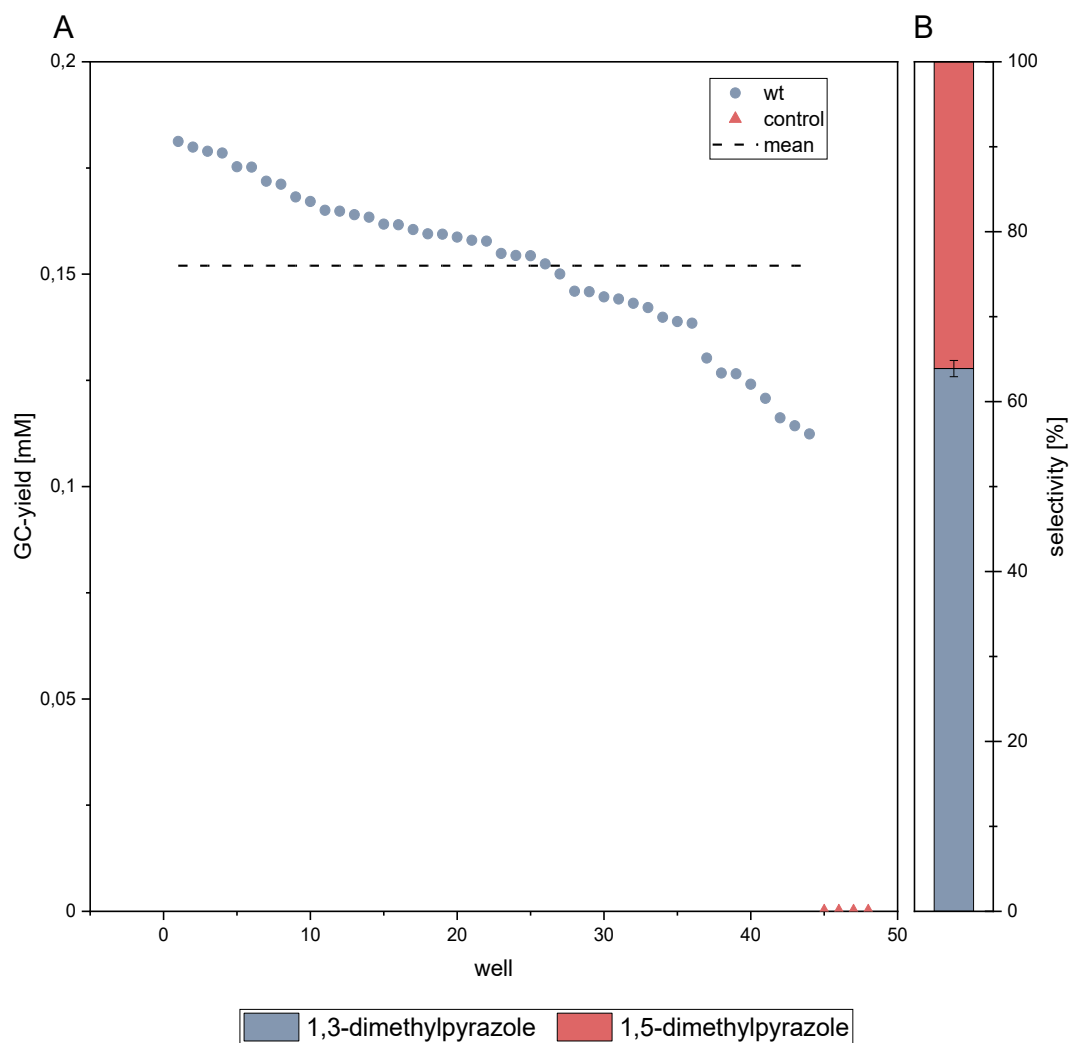

The mean standard deviation (CV) and the selectivity of the 24 deep well plate (DWP) screening was measured using 400  $\mu$ l wtNMT lysate, 2 mM 3-methylpyrazole and 2 mM SAM at 37°C and 20 h according to paragraph II.(H). **A)** The CV of 2x 24-DWPs was 12.2% and the empty vector control showed no activity. **B)** The wt selectivity under screening conditions was 64% for 1,3-dimethylpyrazole with a sdev of 1%.

**Figure S8:** Screening of enzymatic methylation of 3-methylpyrazole

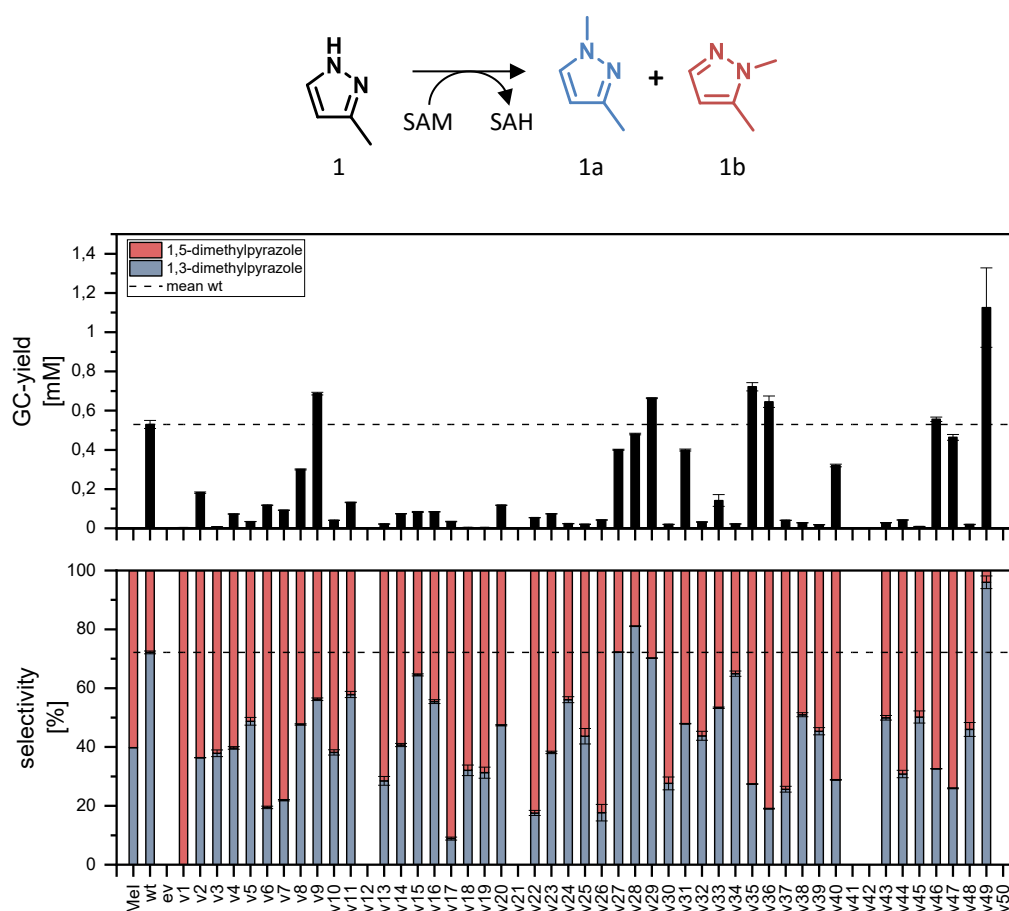

The screening of the substrate 3-methylpyrazole (**1**) was performed using 400  $\mu$ l lysate, and 2 mM substrate and SAM respectively at 37°C and 20 h according to paragraph II (H). The upper graph shows the total GC-yield of the reactions (black bars) and the mean wtNMT-yield (dashed line). The underneath graph shows the selectivity of the enzymes, with the selectivity of chemical methylation with methyl iodide (MeI) as reference and the empty vector (ev) as a control. The mean wt selectivity is shown in dashed lines. Error bars show standard deviation of triplicates.

**Figure S9:** Screening of enzymatic methylation of 3,4-dimethylpyrazole

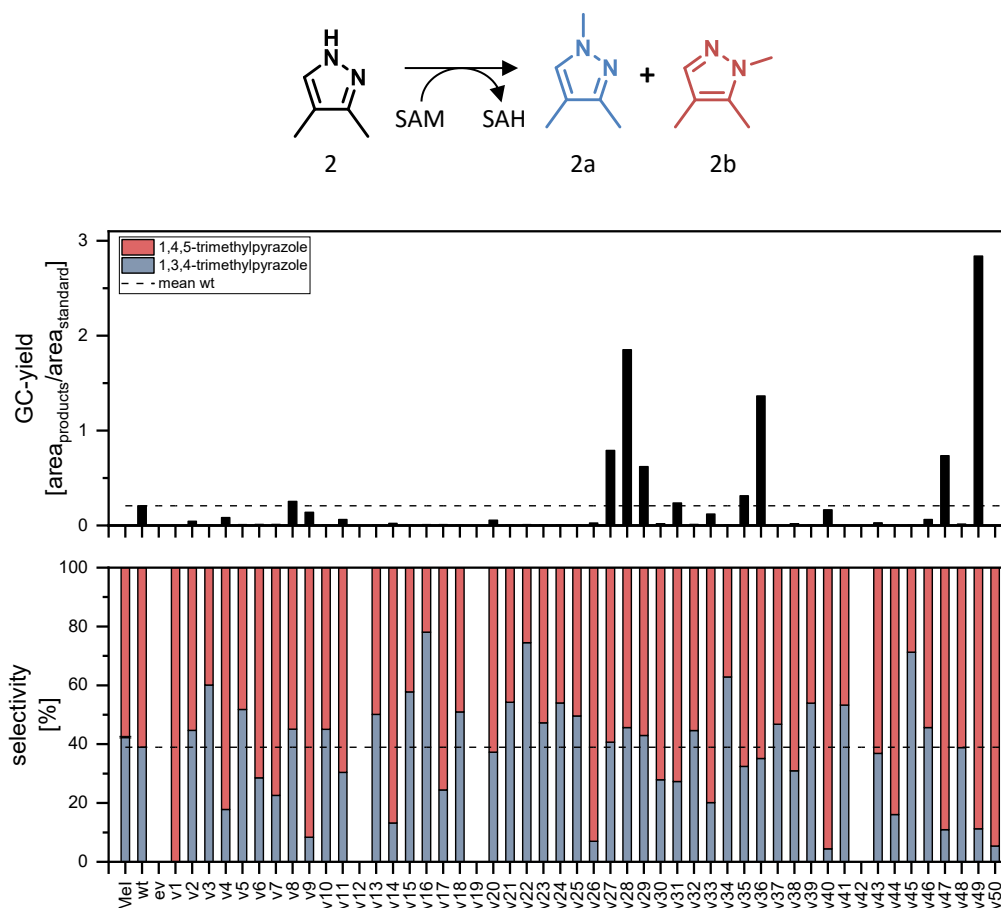

The screening of the substrate 3,4-dimethylpyrazole (**2**) was performed using 400  $\mu$ l lysate, and 2 mM substrate and SAM respectively at 37°C and 20 h according to paragraph II (H). The upper graph shows the total GC-yield of the reactions (black bars) and the mean wtNMT-yield (dashed line). The underneath graph shows the selectivity of the enzymes, with the selectivity of chemical methylation with methyl iodide (MeI) as reference and the empty vector (ev) as a control. The mean wt selectivity is shown in dashed lines. Error bars for wt show standard deviation of triplicates.

**Figure S10:** Screening of enzymatic methylation of 3-cyclopropylpyrazole

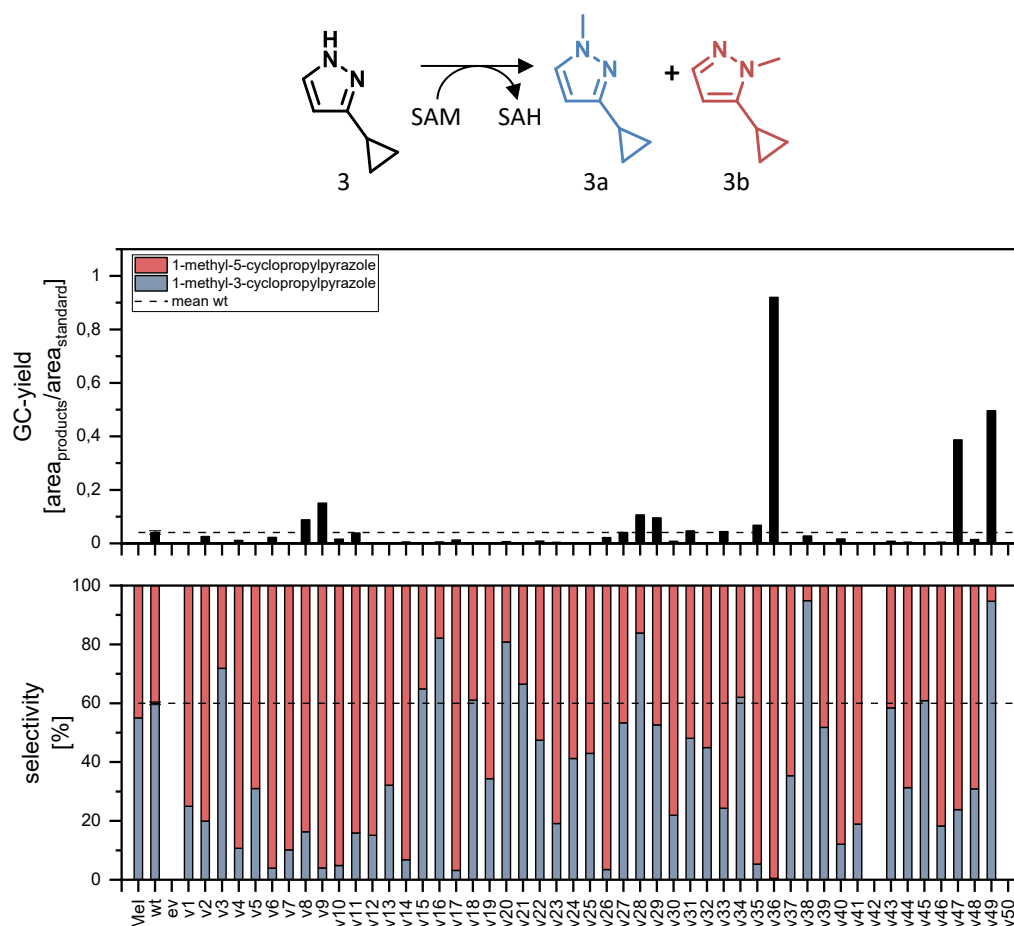

The screening of the substrate 3-cyclopropylpyrazole (**3**) was performed using 400  $\mu$ l lysate, and 2 mM substrate and SAM respectively at 37°C and 20 h according to paragraph II (H). The upper graph shows the total GC-yield of the reactions (black bars) and the mean wtNMT-yield (dashed line). The underneath graph shows the selectivity of the enzymes, with the selectivity of chemical methylation with methyl iodide (MeI) as reference and the empty vector (ev) as a control. The mean wt selectivity is shown in dashed lines. Error bars for wt show standard deviation of triplicates.

**Figure S11:** Screening of enzymatic methylation of 3(2-furyl)pyrazole

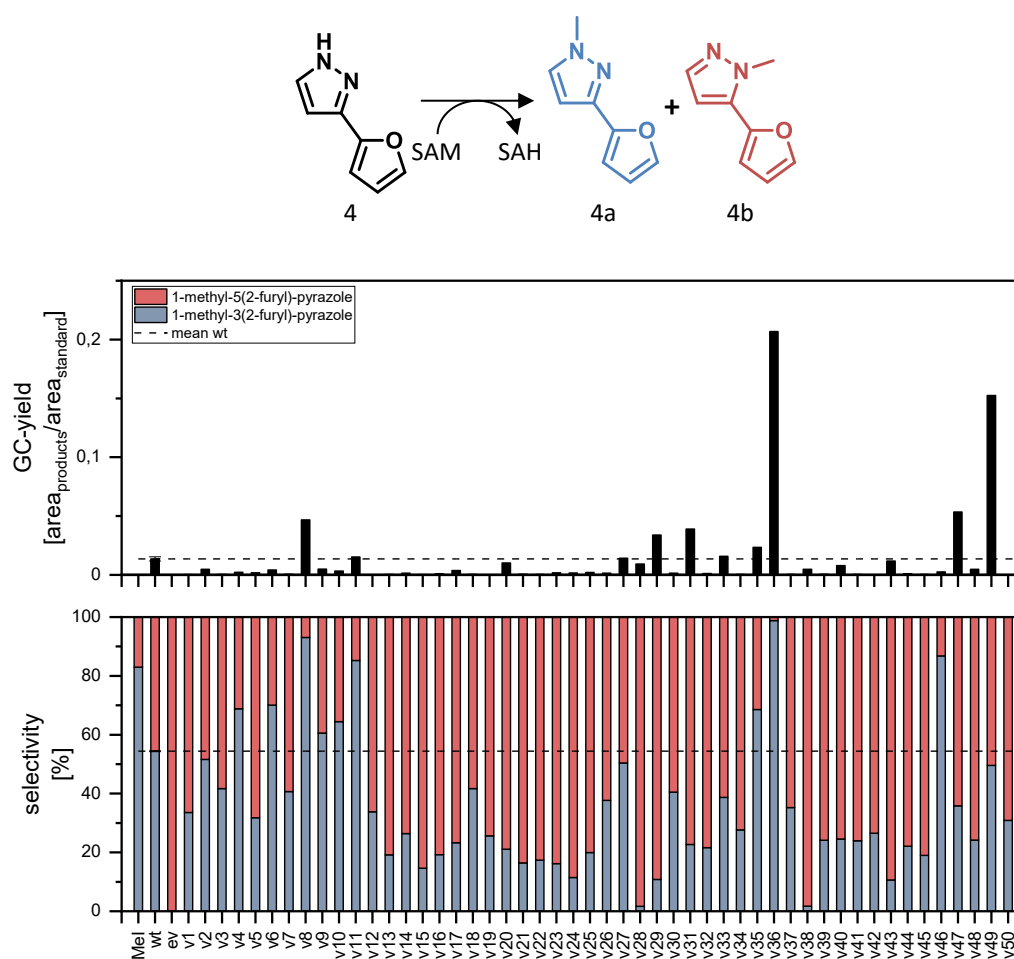

The screening of the substrate 3(2-furyl)pyrazole (**4**) was performed using 400  $\mu$ l lysate, and 2 mM substrate and SAM respectively at 37°C and 20 h according to paragraph II (H). The upper graph shows the total GC-yield of the reactions (black bars) and the mean wtNMT-yield (dashed line). The underneath graph shows the selectivity of the enzymes, with the selectivity of chemical methylation with methyl iodide (MeI) as reference and the empty vector (ev) as a control. The mean wt selectivity is shown in dashed lines. Error bars for wt show standard deviation of triplicates.



**Figure S12:** Screening of enzymatic methylation of 3(2-fluorophenyl)pyrazole

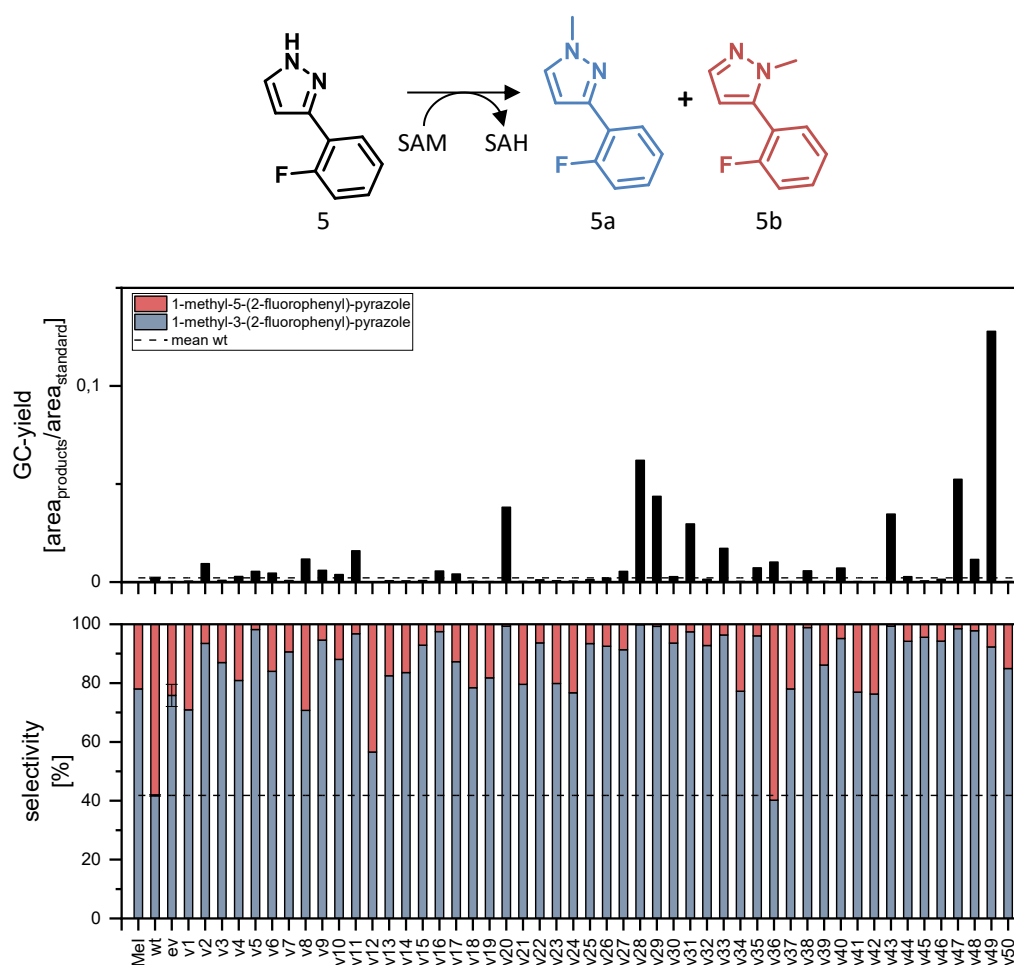

The screening of the substrate 3(2-fluorophenyl)pyrazole (**5**) was performed using 400  $\mu$ l lysate, and 2 mM substrate and SAM respectively at 37°C and 20 h according to paragraph II (H). The upper graph shows the total GC-yield of the reactions (black bars) and the mean wtNMT-yield (dashed line). The underneath graph shows the selectivity of the enzymes, with the selectivity of chemical methylation with methyl iodide (MeI) as reference and the empty vector (ev) as a control. The mean wt selectivity is shown in dashed lines. Error bars for wt show standard deviation of triplicates.

**Figure S13:** Screening of enzymatic methylation of 3-methyl-4-phenylpyrazole

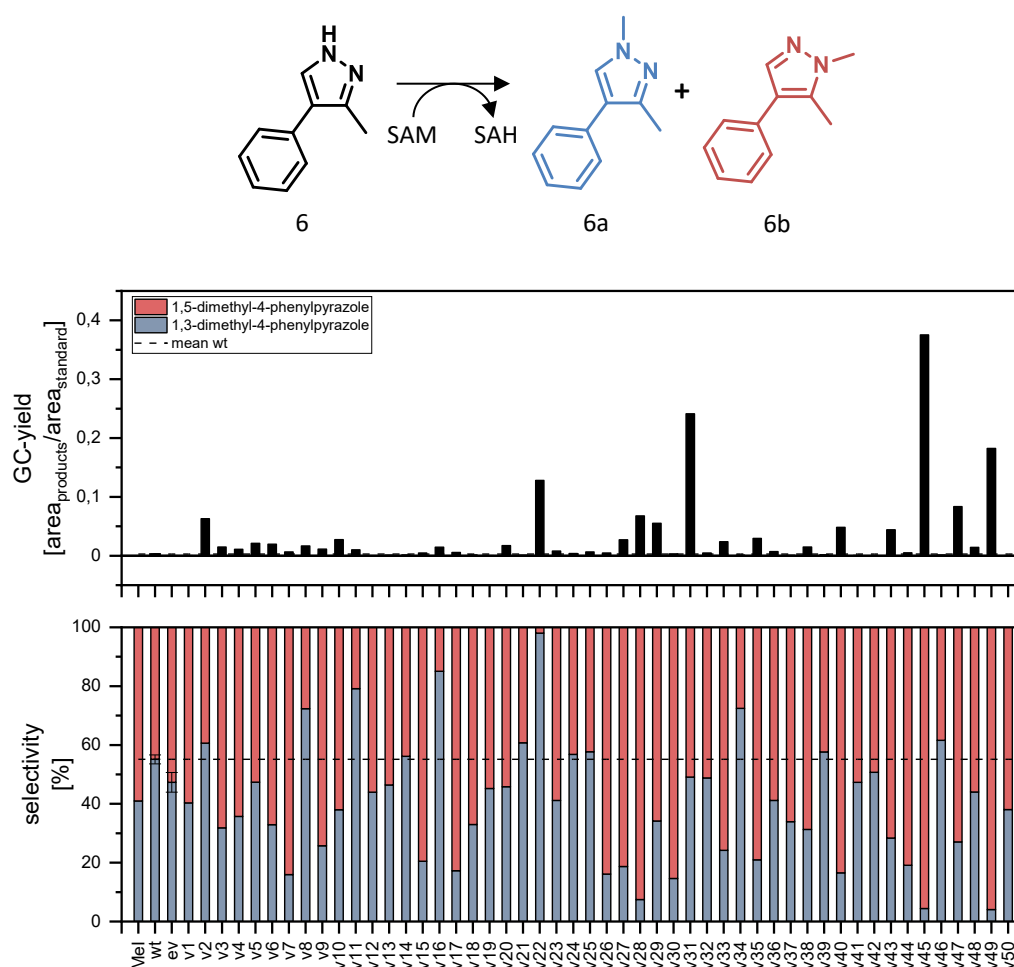

The screening of the substrate 3-methyl-4-phenylpyrazole (**6**) was performed using 400  $\mu$ l lysate, and 2 mM substrate and SAM respectively at 37°C and 20 h according to paragraph II (H). The upper graph shows the total GC-yield of the reactions (black bars) and the mean wtNMT-yield (dashed line). The underneath graph shows the selectivity of the enzymes, with the selectivity of chemical methylation with methyl iodide (MeI) as reference and the empty vector (ev) as a control. The mean wt selectivity is shown in dashed lines. Error bars for wt show standard deviation of triplicates.

**Figure S14:** SDS-PAGEs of purified wtNMT, selected FuncLib variants and NSA-synthase

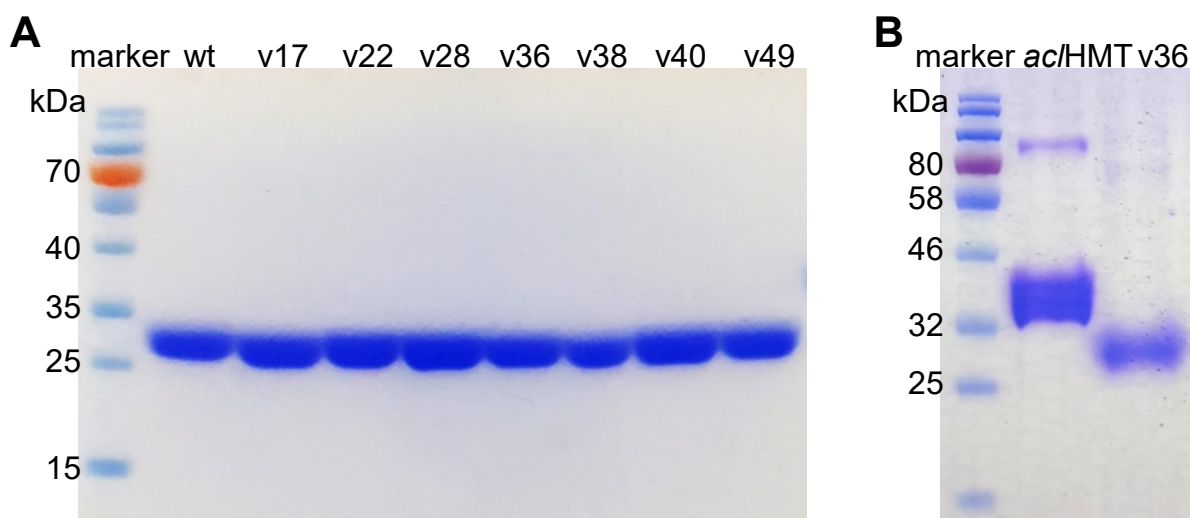

The SDS-PAGEs show the purified wtNMT, selected FuncLib variants and NSA-synthase (*ac/HMT*). **A)** SDS-PAGE of wtNMT and selected FuncLib variants. 20  $\mu$ g of purified enzyme with 6x SDS loading buffer was loaded to an 12% SDS-PAGE and run with 140 V for 1 h. **B)** SDS-PAGE of NSA-synthase and v36 used in the cyclic cascade. 20  $\mu$ g of purified enzyme with 4x SDS loading buffer was loaded to an 12% SDS-PAGE and run with 120 V for 1 h.

**Figure S15:** Selectivity analysis of the enzymatic methylation of 3-methylpyrazole

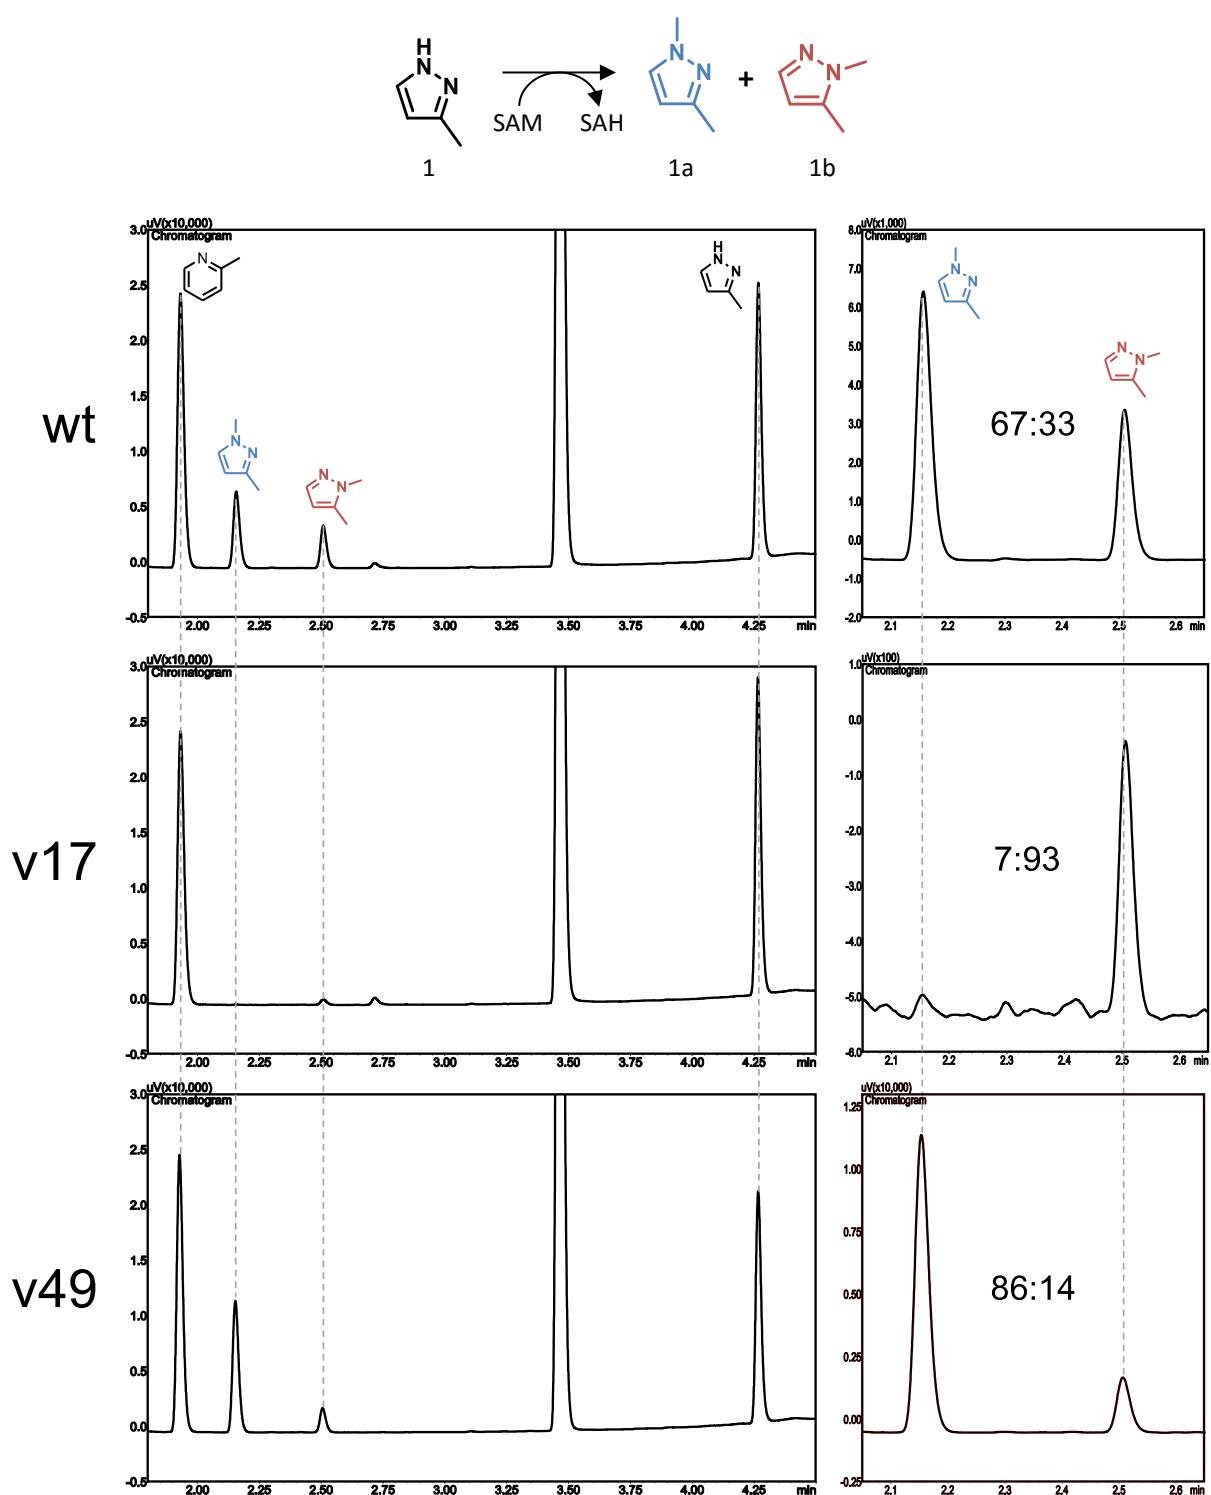

The GC chromatograms show the enzymatic methylation of 3-methylpyrazole (**1**) with wtNMT (top) and FunLib variants v17 (middle) and v49 (bottom). The reactions were performed using 2 mM substrate, 4 mM SAM and 50  $\mu$ M enzyme at 37°C and 20 h as described in detail in paragraph II.(I). Chromatograms in the left row show the internal standard 2-methylpyridine, methylated products, DMSO (ret. time 3.455 min) and the substrate. Chromatograms in the right row are zoomed into the product peaks for better visualization of product selectivities.

**Figure S16:** Selectivity analysis of the enzymatic methylation of 3,4-dimethylpyrazole

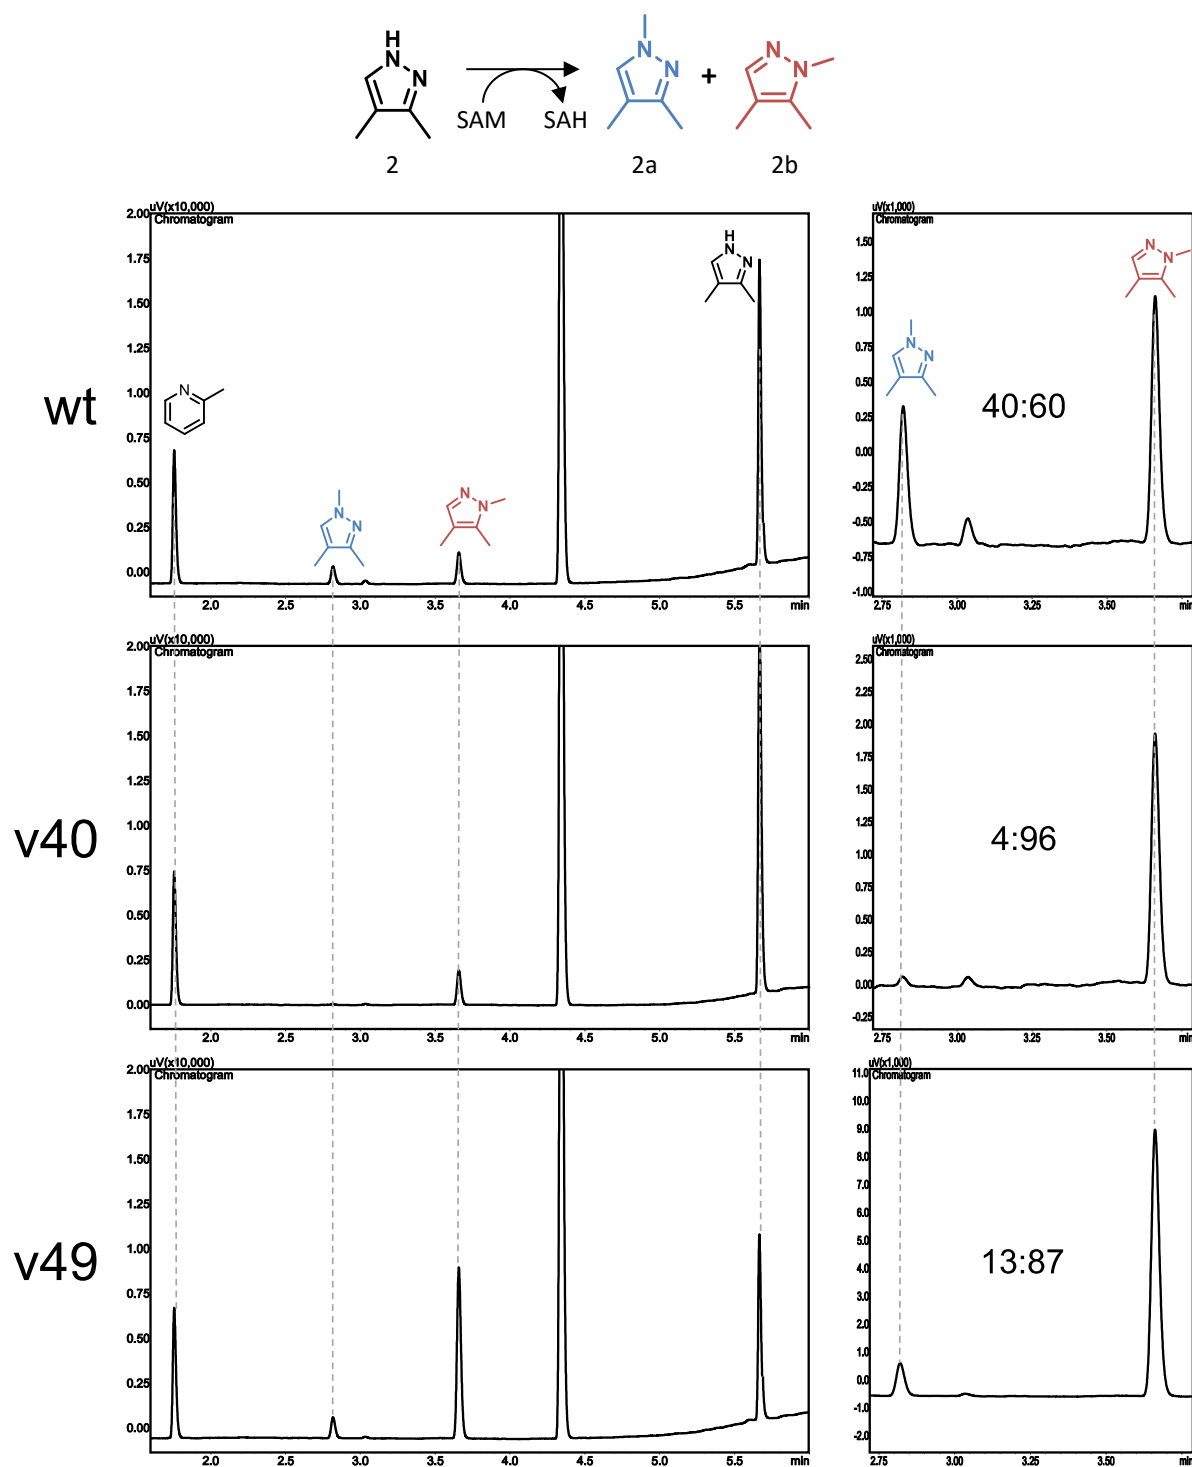

The GC chromatograms show the enzymatic methylation of 3,4-dimethylpyrazole (**2**) with wtNMT (top) and FuncLib variants v40 (middle) and v49 (bottom). The reactions were performed using 2 mM substrate, 4 mM SAM and 50  $\mu$ M enzyme at 37°C and 20 h as described in detail in paragraph II.(I). Chromatograms in the left row show the internal standard 2-methylpyridine, methylated products, DMSO (ret time 4.35 min) and the substrate. Chromatograms in the right row are zoomed into the product peaks for better visualization of product selectivities.

**Figure S17:** Selectivity analysis of the enzymatic methylation of 3-cyclopropylpyrazole

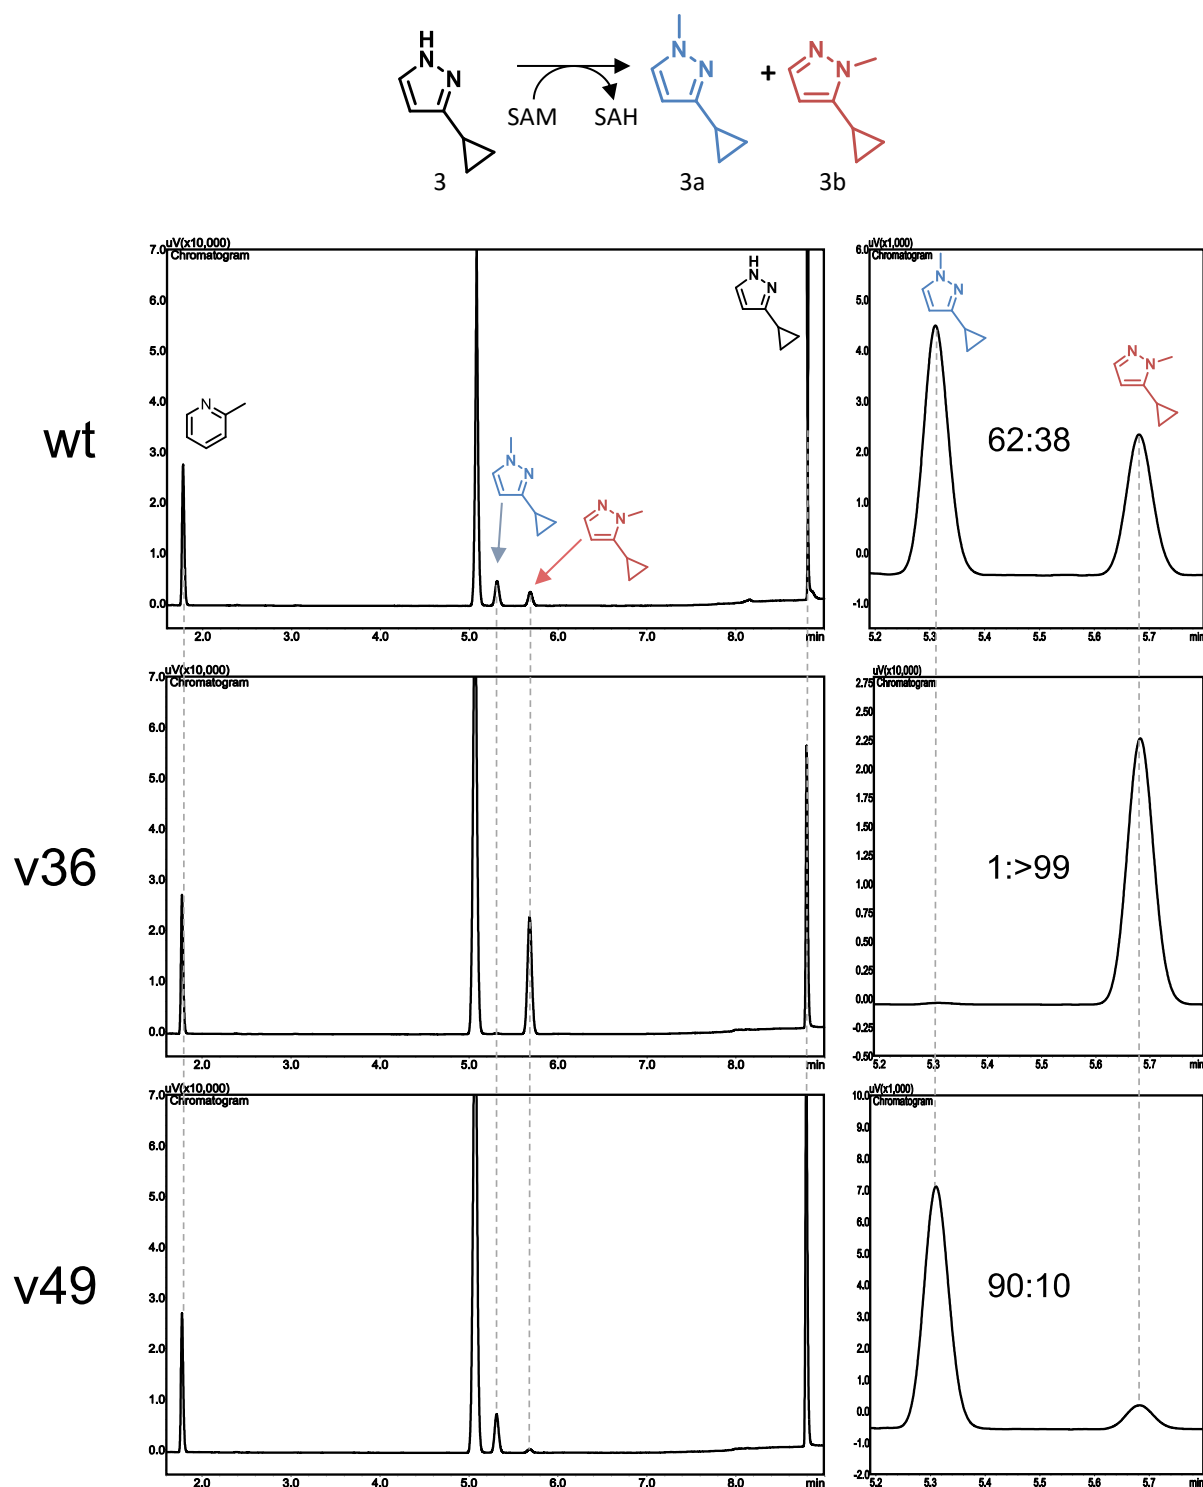

The GC chromatograms show the enzymatic methylation of 3-cyclopropylpyrazole (**3**) with wtNMT (top) and FuncLib variants v36 (middle) and v49 (bottom). The reactions were performed using 2 mM substrate, 4 mM SAM and 50  $\mu$ M enzyme at 37°C and 20 h as described in detail in paragraph II.(I). Chromatograms in the left row show the internal standard 2-methylpyridine, methylated products, DMSO (ret. time 5.1 min) and the substrate. Chromatograms in the right row are zoomed into the product peaks for better visualization of product selectivities.

**Figure S18:** Selectivity analysis of the enzymatic methylation of 3(2-furyl)pyrazole

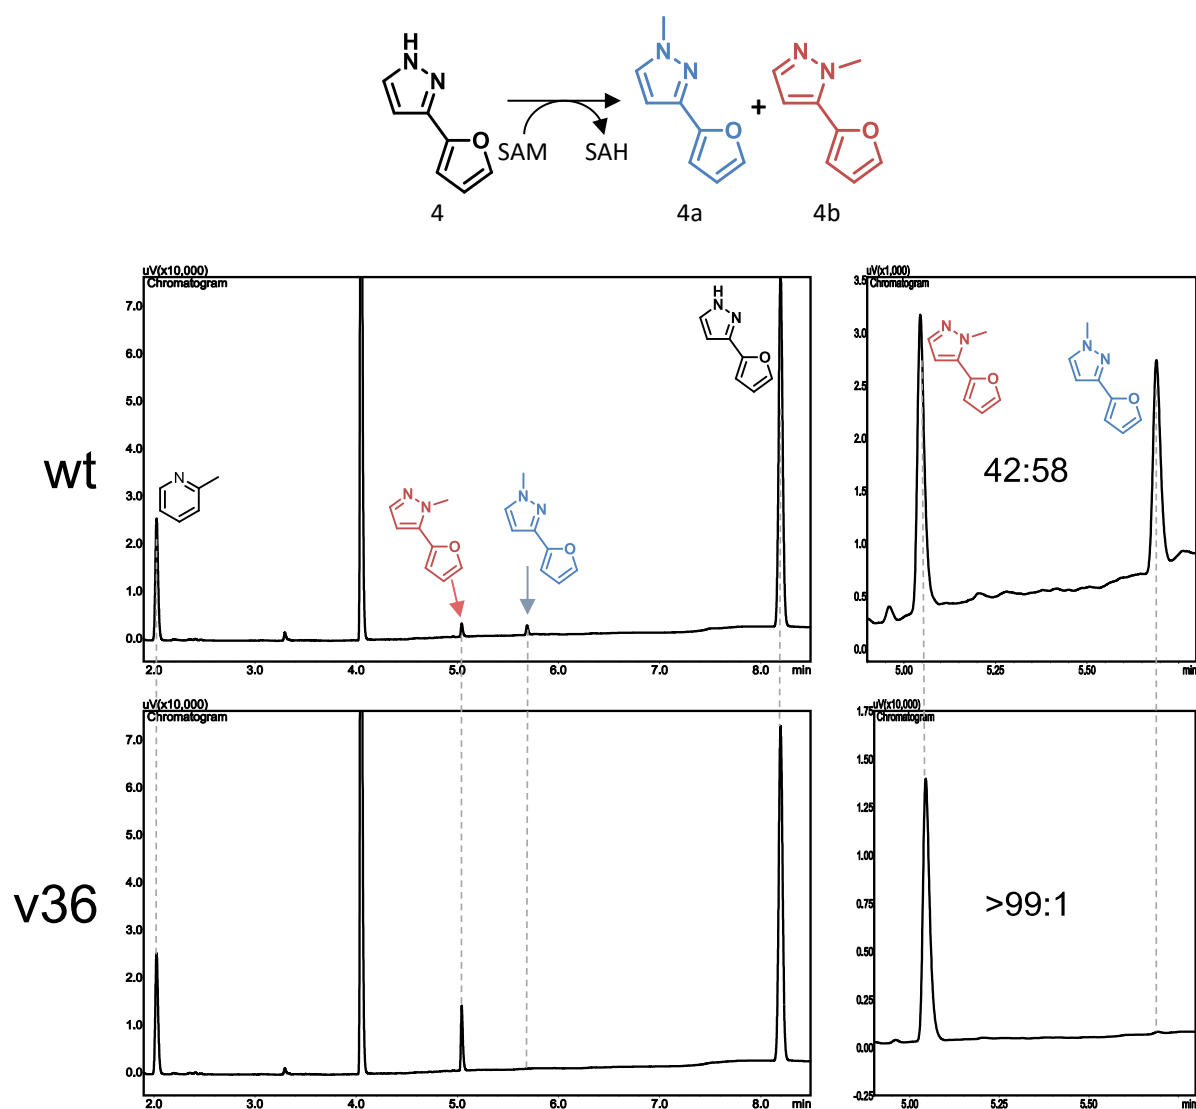

The GC chromatograms show the enzymatic methylation of 3(2-furyl)pyrazole (**4**) with wtNMT (top) and FuncLib variant v36 (bottom). The reactions were performed using 2 mM substrate, 4 mM SAM and 50  $\mu$ M enzyme at 37°C and 20 h as described in detail in paragraph II.(I). Chromatograms in the left row show the internal standard 2-methylpyridine, methylated products, DMSO (ret. time 4.05 min) and the substrate. Chromatograms in the right row are zoomed into the product peaks for better visualization of product selectivities.

**Figure S19:** Selectivity analysis of the enzymatic methylation of 3(2-fluorophenyl)pyrazole

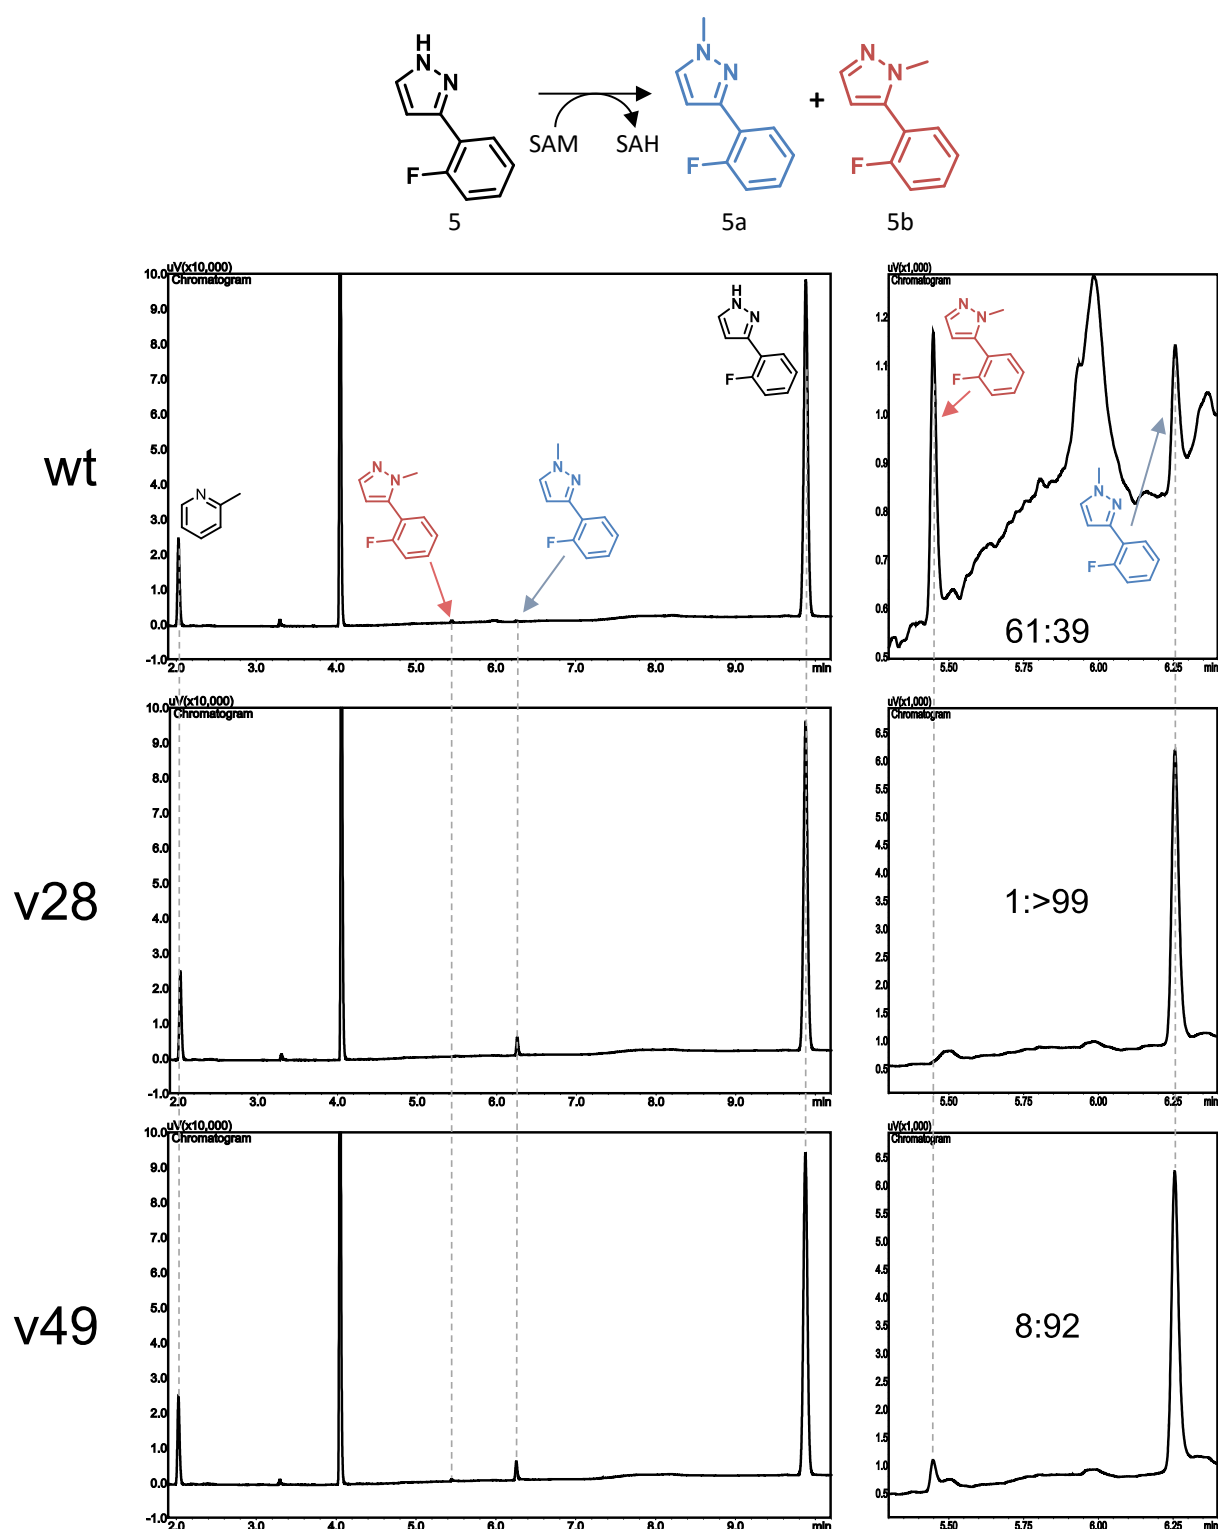

The GC chromatograms show the enzymatic methylation of 3(2-fluorophenyl)pyrazole (**5**) with wtNMT (top) and FuncLib variants v28 (middle) and v49 (bottom). The reactions were performed using 2 mM substrate, 4 mM SAM and 50  $\mu$ M enzyme at 37°C and 20 h as described in detail in paragraph II.(I). Chromatograms in the left row show the internal standard 2-methylpyridine, methylated products, DMSO (ret. time 4.05 min) and the substrate. Chromatograms in the right row are zoomed into the product peaks for better visualization of product selectivities.



**Figure S20:** Selectivity analysis of the enzymatic methylation of 3-methyl-4-phenylpyrazole

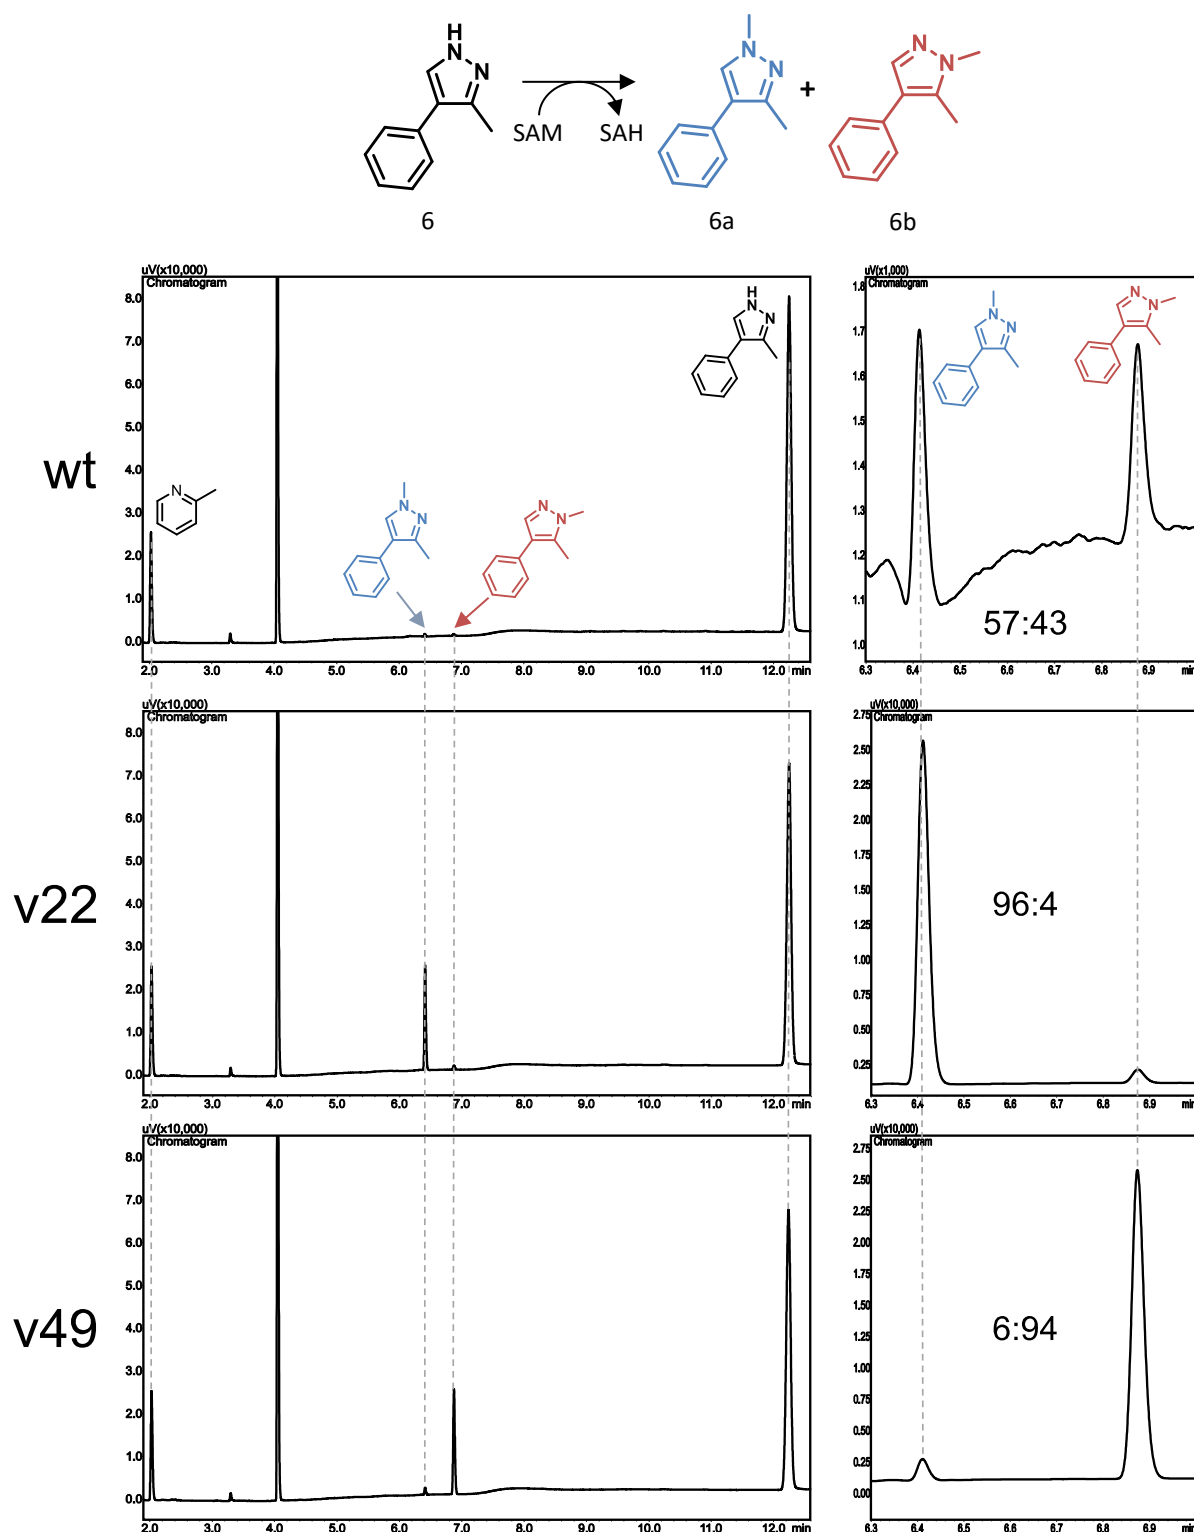

The GC chromatograms show the enzymatic methylation of 3-methyl-4-phenylpyrazole (**6**) with wtNMT (top) and FuncLib variants v22 (middle) and v49 (bottom). The reactions were performed using 2 mM substrate, 4 mM SAM and 50  $\mu$ M enzyme at 37°C and 20 h as described in detail in paragraph II.(I). Chromatograms in the left row show the internal standard 2-methylpyridine, methylated products, DMSO (ret. time 4.05 min) and the substrate. Chromatograms in the right row are zoomed into the product peaks for better visualization of product selectivities.

**Figure S21:** Initial rates for the enzymatic methylation of 3-methylpyrazole (**1**)

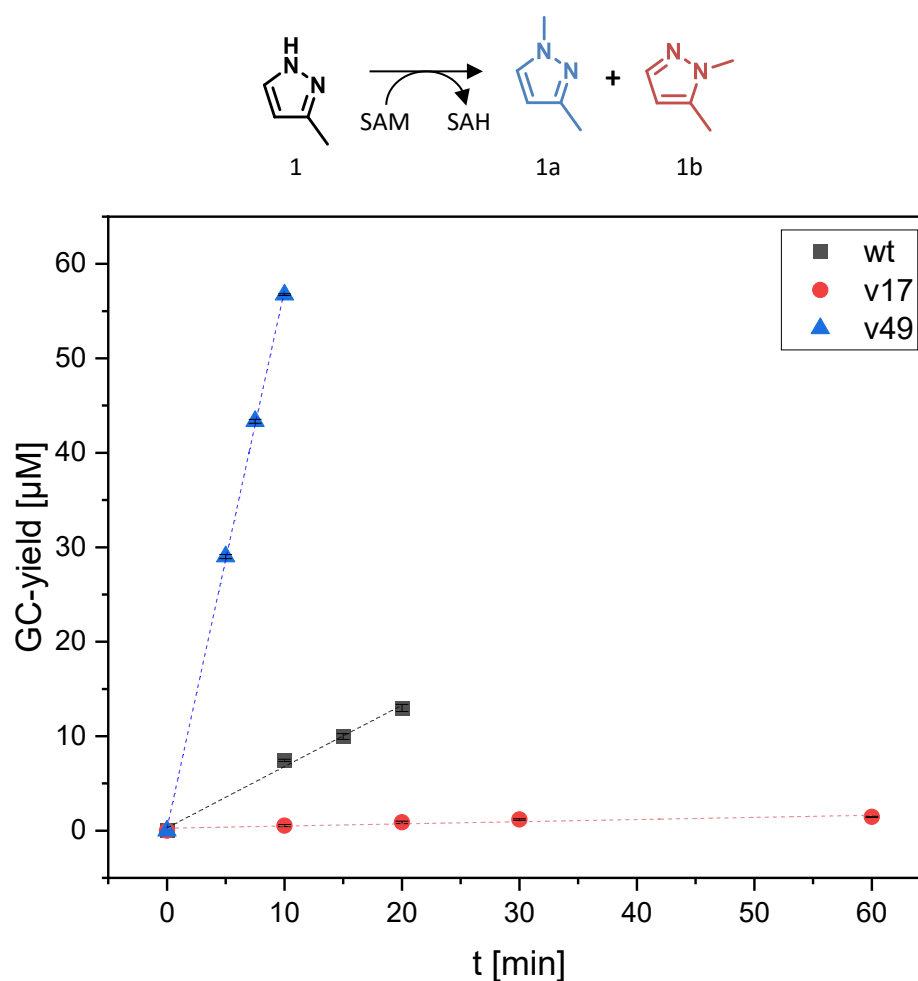

Measurements of initial rates were conducted using 2 mM of each, the pyrazole and SAM and 50  $\mu\text{M}$  enzyme at 37°C as described in detail in paragraph II.(J). The initial rate of wtNMT (grey) was calculated as a slope of 0.65  $\mu\text{M}/\text{min}$  with an  $R^2$  of 0.994. The slope of the initial rate of v17 (red) was calculated as 0.039  $\mu\text{M}/\text{min}$  with an  $R^2$  of 0.98 that reveals an increase factor of 0.06 to the wt. The slope of the initial rate of v49 (blue) was calculated as 5.69 with an  $R^2$  of 0.999  $\mu\text{M}/\text{min}$  that reveals an increase factor of 8.78 to the wt.

**Figure S22:** Initial rates for the enzymatic methylation of 3,4-methylpyrazole (**2**)

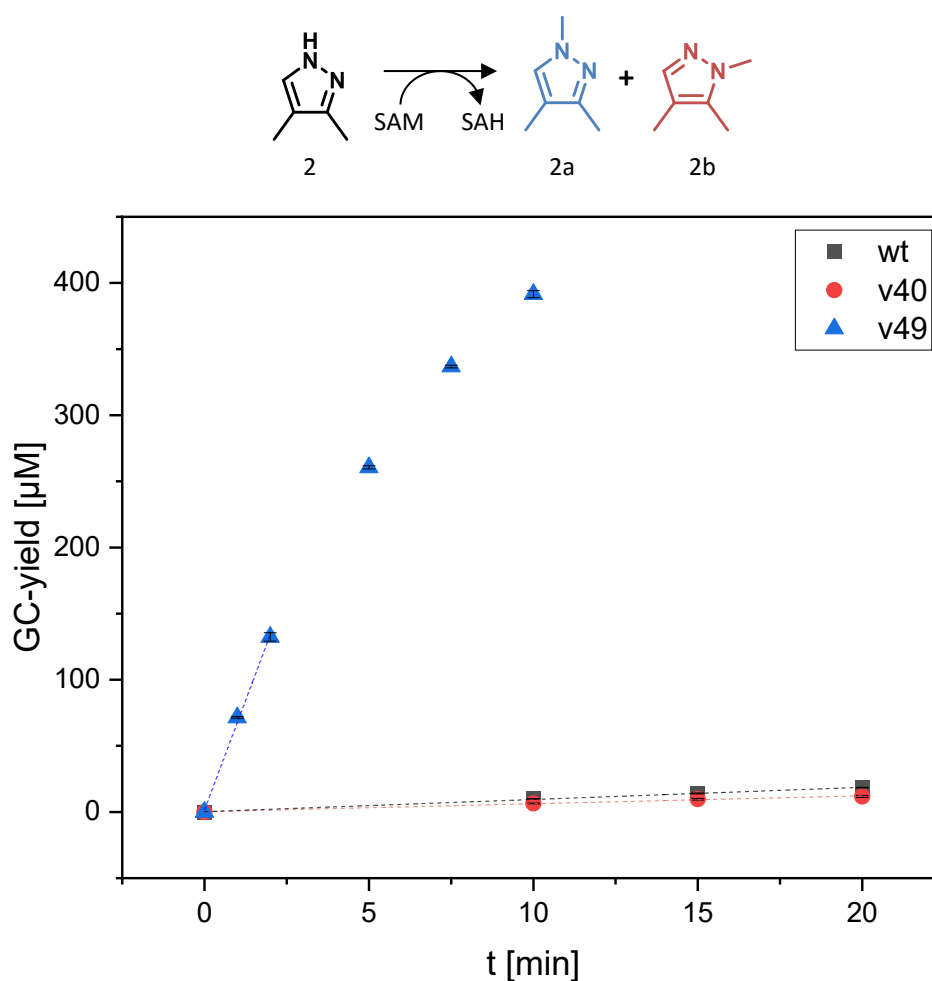

Measurements of initial rates were conducted using 2 mM of each, the pyrazole and SAM and 50  $\mu\text{M}$  enzyme at 37°C as described in detail in paragraph II.(J). The initial rate of wtNMT (grey) was calculated as a slope of 0.92  $\mu\text{M}/\text{min}$  with an  $R^2$  of 0.998. The slope of the initial rate of v40 (red) was calculated as 0.599  $\mu\text{M}/\text{min}$  with an  $R^2$  of 0.993 that reveals an increase factor of 0.65 to the wt. The slope of the initial rate of v49 (blue) was calculated as 66.2  $\mu\text{M}/\text{min}$  with an  $R^2$  of 0.998 that reveals an increase factor of 71.9 to the wt.

**Figure S23:** Initial rates for the enzymatic methylation of 3-cyclopropylpyrazole (**3**)

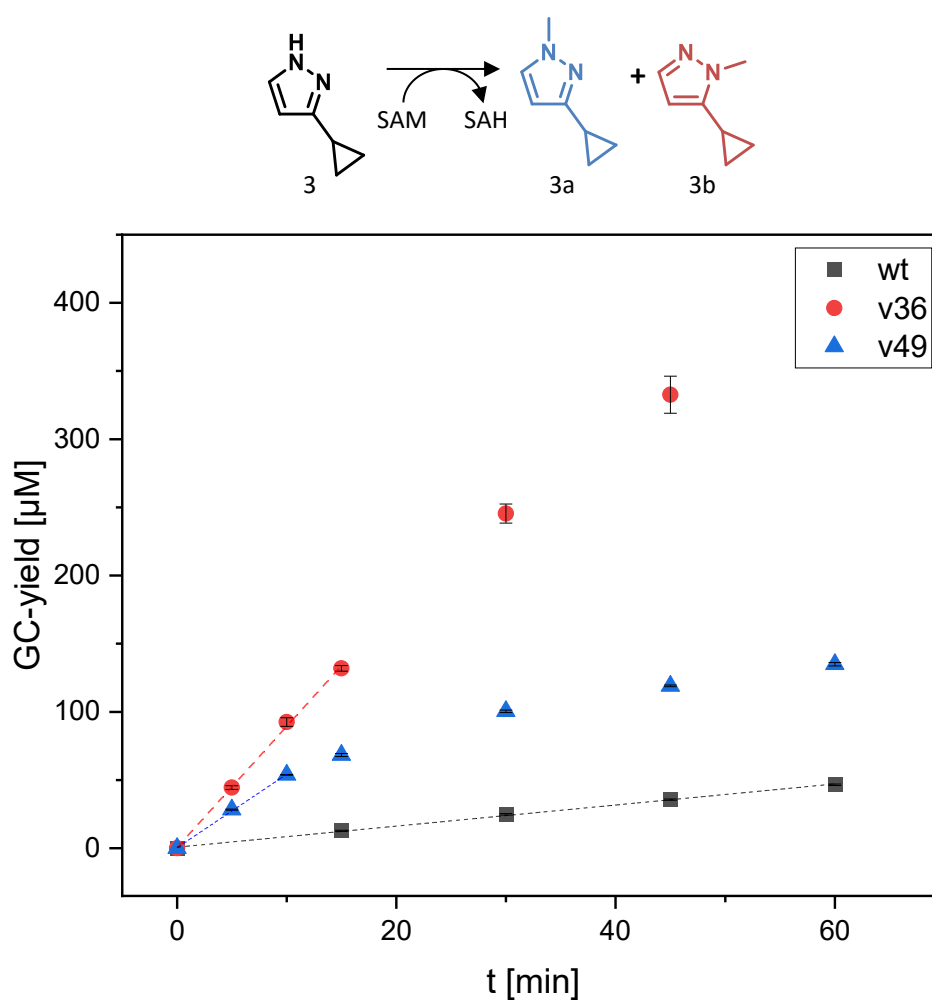

Measurements of initial rates were conducted using 2 mM of each, the pyrazole and SAM and 50  $\mu\text{M}$  enzyme at 37°C as described in detail in paragraph II.(J). The initial rate of wtNMT (grey) was calculated as a slope of 0.77  $\mu\text{M}/\text{min}$  with an  $R^2$  of 0.999. The slope of the initial rate of v36 (red) was calculated as 8.87  $\mu\text{M}/\text{min}$  with an  $R^2$  of 0.999 that reveals an increase factor of 11.5 to the wt. The slope of the initial rate of v49 (blue) was calculated as 5.39  $\mu\text{M}/\text{min}$  with an  $R^2$  of 0.999 that reveals an increase factor of 7.0 to the wt.

**Figure S24:** Initial rates for the enzymatic methylation of 3(2-furyl)pyrazole (**4**)

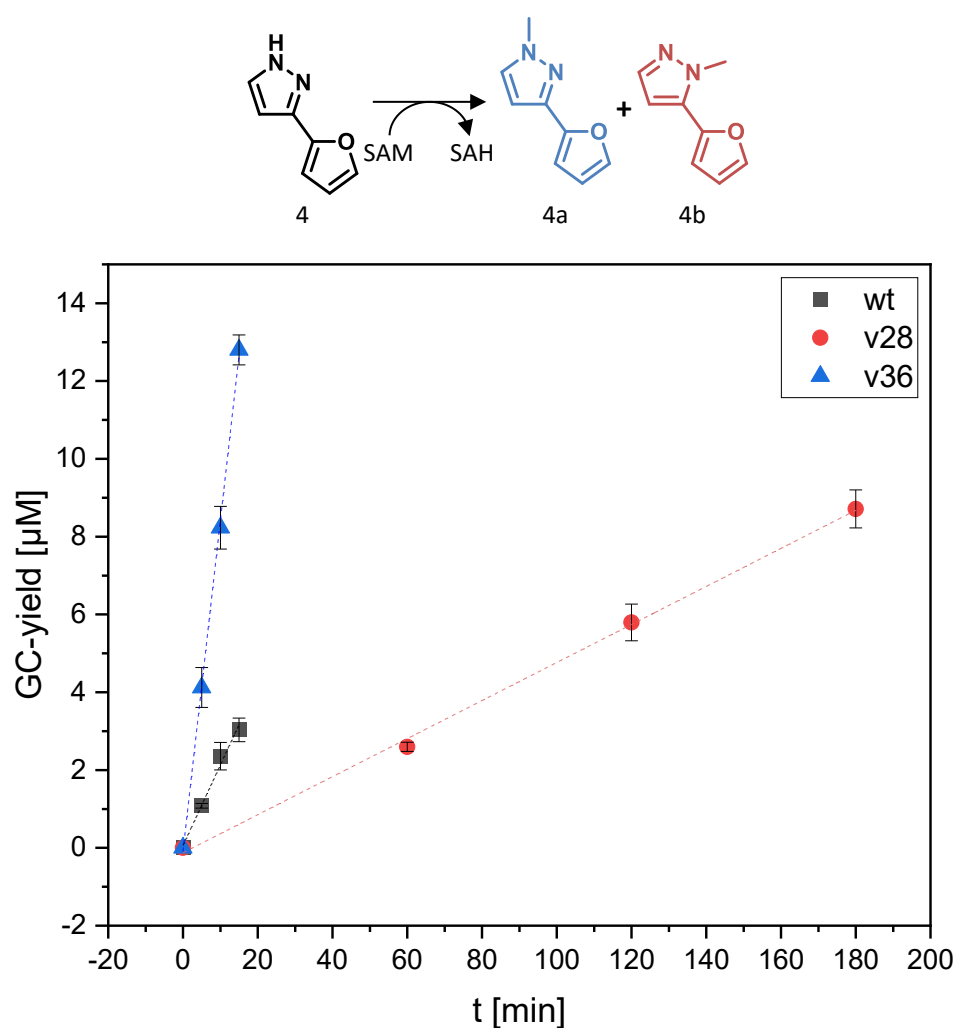

Measurements of initial rates were conducted using 2 mM of each, the pyrazole and SAM and 50  $\mu\text{M}$  enzyme at 37°C as described in detail in paragraph II.(J). The initial rate of wtNMT (grey) was calculated as a slope of 0.21  $\mu\text{M}/\text{min}$  with an  $R^2$  of 0.987. The slope of the initial rate of v28 (red) was calculated as 0.049  $\mu\text{M}/\text{min}$  with an  $R^2$  of 0.999 that reveals an increase factor of 0.24 to the wt. The slope of the initial rate of v36 (blue) was calculated as 0.85  $\mu\text{M}/\text{min}$  with an  $R^2$  of 0.999 that reveals an increase factor of 4.1 to the wt.

**Figure S25:** Initial rates for the enzymatic methylation of 3(2-fluorophenyl)pyrazole (**5**)

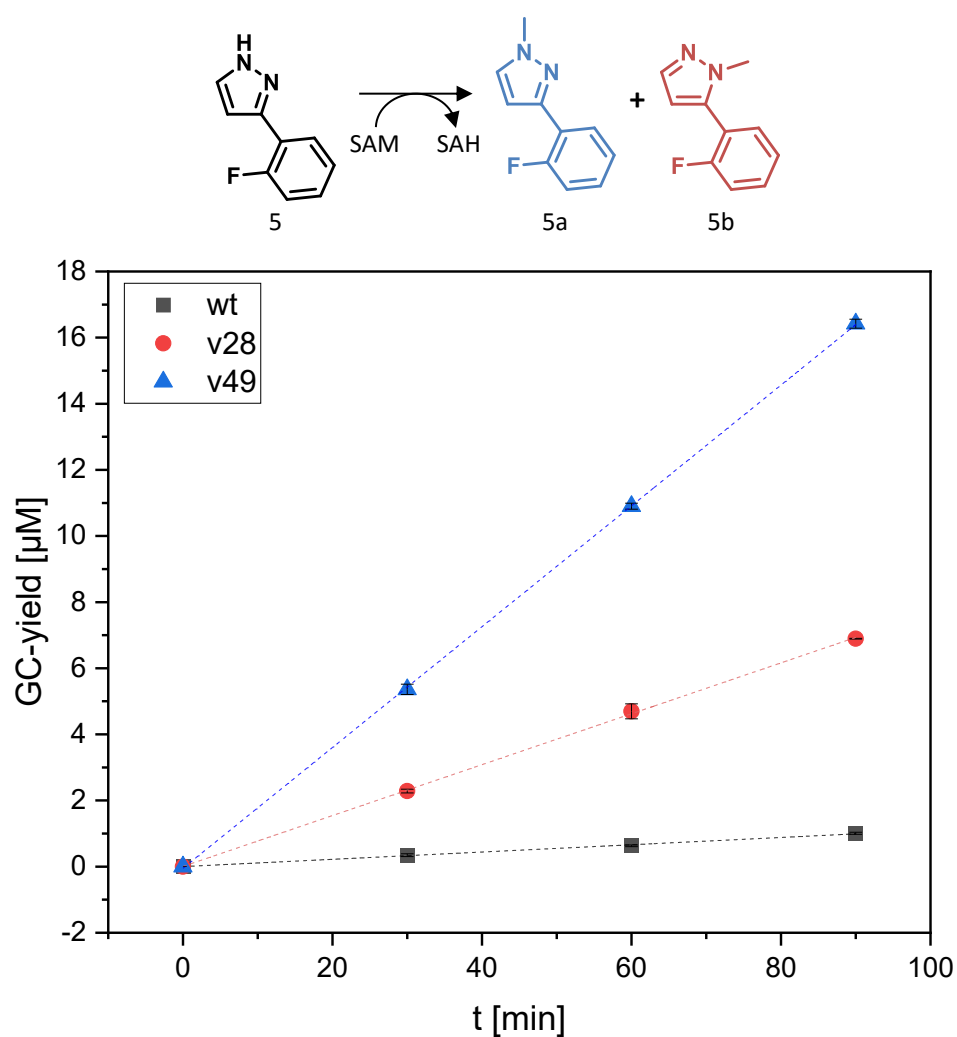

Measurements of initial rates were conducted using 2 mM of each, the pyrazole and SAM and 50  $\mu\text{M}$  enzyme at 37°C as described in detail in paragraph II.(J). The initial rate of wtNMT (grey) was calculated as a slope of 0.011  $\mu\text{M}/\text{min}$  with an  $R^2$  of 0.996. The slope of the initial rate of v28 (red) was calculated as 0.077  $\mu\text{M}/\text{min}$  with an  $R^2$  of 0.999 that reveals an increase factor of 6.89 to the wt. The slope of the initial rate of v49 (blue) was calculated as 0.18  $\mu\text{M}/\text{min}$  with an  $R^2$  of 0.999 that reveals an increase factor of 16.3 to the wt.

**Figure S26:** Initial rates for the enzymatic methylation of 3-methyl-4-phenylpyrazole (**6**)

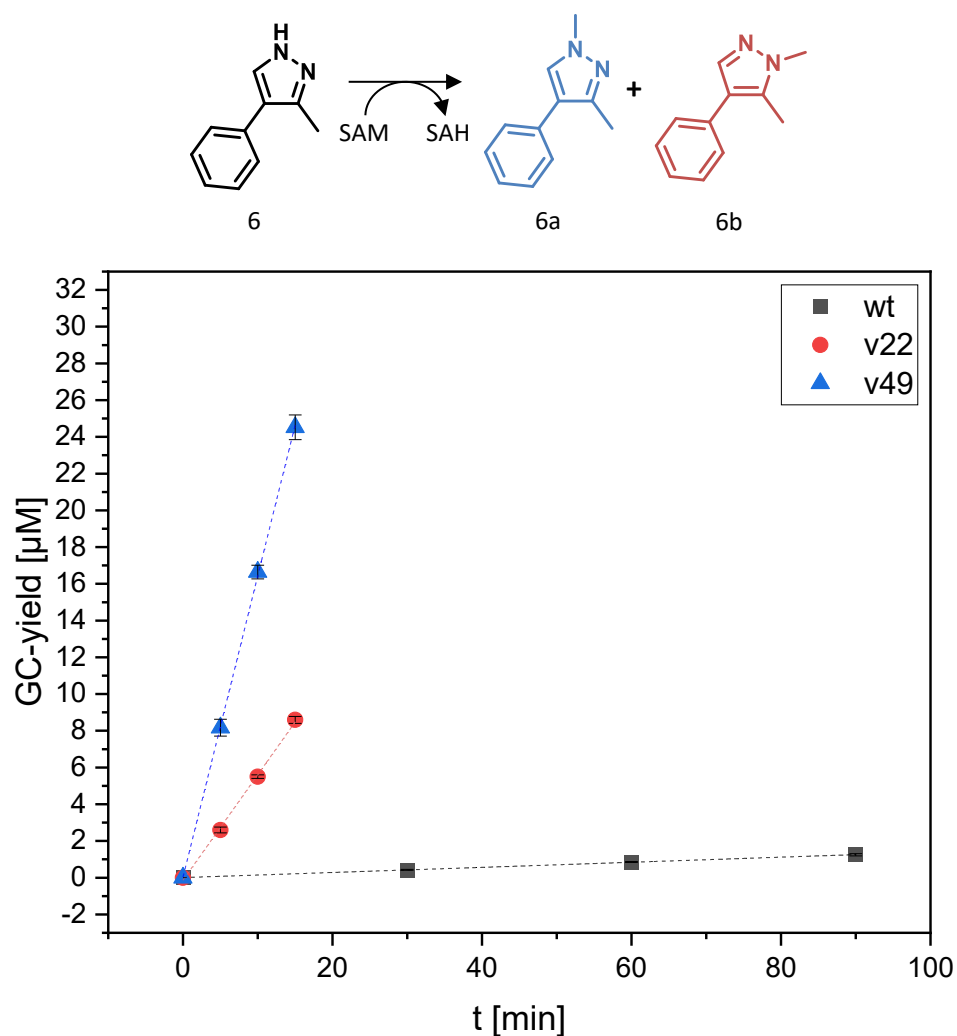

Measurements of initial rates were conducted using 2 mM of each, the pyrazole and SAM and 50  $\mu\text{M}$  enzyme at 37°C as described in detail in paragraph II.(J). The initial rate of wtNMT (grey) was calculated as a slope of 0.014  $\mu\text{M}/\text{min}$  with an  $R^2$  of 0.999. The slope of the initial rate of v22 (red) was calculated as 0.57  $\mu\text{M}/\text{min}$  with an  $R^2$  of 0.999 that reveals an increase factor of 41.3 to the wt. The slope of the initial rate of v49 (blue) was calculated as 1.64  $\mu\text{M}/\text{min}$  with an  $R^2$  of 0.999 that reveals an increase factor of 118 to the wt.

**Figure S27:** Enzymatic methylation of pyrazoles: GC-yields and initial rates

|                                                                                          | Variant       | Conversion in % | Activity in $\mu\text{mol}/\text{min}$ | Activity increase <sup>a</sup> | Selectivity (a:b) |
|------------------------------------------------------------------------------------------|---------------|-----------------|----------------------------------------|--------------------------------|-------------------|
| 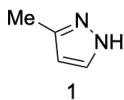<br>1   | NMT wild-type | 14              | 0.64                                   |                                | 67 : 33           |
|                                                                                          | v17           | 0.65            | 0.03                                   | 0.05                           | 7 : <b>93</b>     |
|                                                                                          | v49           | 19              | 5.7                                    | 8.9                            | <b>86</b> : 13    |
| <br>2   | NMT wild-type | 13              | 0.92                                   |                                | 40 : 60           |
|                                                                                          | v40           | 9.1             | 0.59                                   | 0.65                           | 4 : <b>96</b>     |
|                                                                                          | v49           | <b>49</b>       | 66                                     | <b>72</b>                      | 13 : <b>87</b>    |
| <br>3   | NMT wild-type | 10              | 0.78                                   |                                | 62 : 38           |
|                                                                                          | v36           | <b>34</b>       | 8.9                                    | <b>11</b>                      | 1 : <b>&gt;99</b> |
|                                                                                          | v49           | 11              | 5.4                                    | 7.0                            | <b>90</b> : 10    |
| <br>4  | NMT wild-type | 6.6             | 0.22                                   |                                | 42 : 58           |
|                                                                                          | v36           | 18              | 0.85                                   | 3.8                            | 1 : <b>&gt;99</b> |
| <br>5 | NMT wild-type | 0.39            | 0.01                                   |                                | 39 : 61           |
|                                                                                          | v28           | 2.4             | 0.08                                   | 7.0                            | <b>&gt;99</b> : 1 |
|                                                                                          | v49           | 2.7             | 0.18                                   | <b>17</b>                      | <b>92</b> : 8     |
| <br>6 | NMT wild-type | 0.49            | 0.014                                  |                                | 57 : 43           |
|                                                                                          | v22           | 11              | 0.57                                   | <b>41</b>                      | <b>96</b> : 4     |
|                                                                                          | v49           | 11              | 1.6                                    | <b>118</b>                     | 6 : <b>94</b>     |

This figure supports Fig. 3A in the main paper with the addition of percentage conversion. Please note that in our opinion percentage conversion is not a good indicator to validate the performance of the variants. In this experimental setup SAM has been used as stoichiometric reagent and SAH is generated as stoichiometric byproduct. It is, however, known that SAH inhibits methyltransferases in general and NMT in particular.<sup>[19]</sup> For this reason, initial rate determination at very low SAH byproduct concentration is more insightful than percentage conversion to compare the described variants. Initial rates were analyzed using 2 mM pyrazole, 2 mM SAM and 50  $\mu\text{M}$  enzyme at 37°C. Percentage conversion for each reaction was analyzed using 2 mM pyrazole, 4 mM SAM and 50  $\mu\text{M}$  enzyme at 37 °C for 20 h. All enzymatic reactions were performed in triplicates. Please note that all chemical methylations as well as the reactions with the wild-type NMT generate product mixtures (see Fig. S1 and S15-S20). <sup>a)</sup> Activity increase is calculated by dividing the initial rate of the variant by the initial rate of NMT wild-type.



**Figure S28:** Substrate scope screening of the HMTs

|                | MeI<br>(80 equiv.) | EtI<br>(60 equiv.) | EtBr<br>(70 equiv.) | PropI<br>(50 equiv.) | ButI<br>(40 equiv.) | ButBr<br>(50 equiv.) | ButCl<br>(50 equiv.) |
|----------------|--------------------|--------------------|---------------------|----------------------|---------------------|----------------------|----------------------|
|                | conversion [%]     |                    |                     |                      |                     |                      |                      |
| buffer         | 1                  | 0                  | 0                   | 0                    | 0                   | 0                    | 0                    |
| empty vector   | 10                 | 0                  | 0                   | 0                    | 0                   | 0                    | 0                    |
| <i>cth</i> HMT | 97                 | 1                  | 0                   | 0                    | 1                   | 0                    | 0                    |
| <i>ath</i> HMT | 100                | 44                 | 1                   | 0                    | 0                   | 0                    | 0                    |
| <i>acI</i> HMT | 100                | 78                 | 99                  | 31                   | 3                   | 2                    | 1                    |
| <i>bma</i> HMT | 99                 | 81                 | 100                 | 1                    | 0                   | 0                    | 0                    |
| <i>bxe</i> HMT | 99                 | 2                  | 2                   | 0                    | 0                   | 0                    | 0                    |
| <i>sel</i> HMT | 100                | 61                 | 21                  | 3                    | 1                   | 0                    | 0                    |

The 500  $\mu$ l biotransformations of the screening of HMTs were performed with 245  $\mu$ l lysate, 1 mM SAH and 40-80 equivalents of haloalkanes at 25°C for 20 h as described in paragraph II.(K). The product formation was analyzed by HPLC (I.(E)). The tested HMTs are NSA-synthase *Aspergillus clavatus* halide methyl transferase (*acI*HMT, UniProtKB: A1CIS5), *Chloracidobacterium thermophilum* HMT (*cth*HMT, UniProtKB: G2LF24), *Arabidopsis thaliana* HMT (*ath*HMT, UniProtKB: Q6AWU6), *Batis maritima* HMT (*bma*HMT, UniProtKB: Q7ZSZ7), *Burkholderia xenovorans* (*bxe*HMT, NCBI: WP\_011486779) and *Synechococcus elongatus* (*sel*HMT, UniProtKB: Q31S13). Please note that each haloalkane substrate was tested in independent experiments to examine the promiscuity of the selected enzymes, therefore conversion of different haloalkanes is not directly comparable. All screened enzymes showed full conversion with iodomethane (MeI) and only little non-enzymatic reaction was observed. For iodoethane (EtI) and bromoethane (EtBr), only 4 of the tested enzymes reached medium to good conversions. Interestingly, the previously described *cth*HMT showed lowest or no conversions for all haloalkanes with longer alkyl-chains than methyl. The only enzyme that was active for all examined haloalkanes was *acI*HMT, that we further named NSA-synthase. No non-enzymatic reactions occurred for haloalkanes with longer alkyl-chains than methyl.

**Figure S29:** NSA-synthase catalyzed SAH alkylation

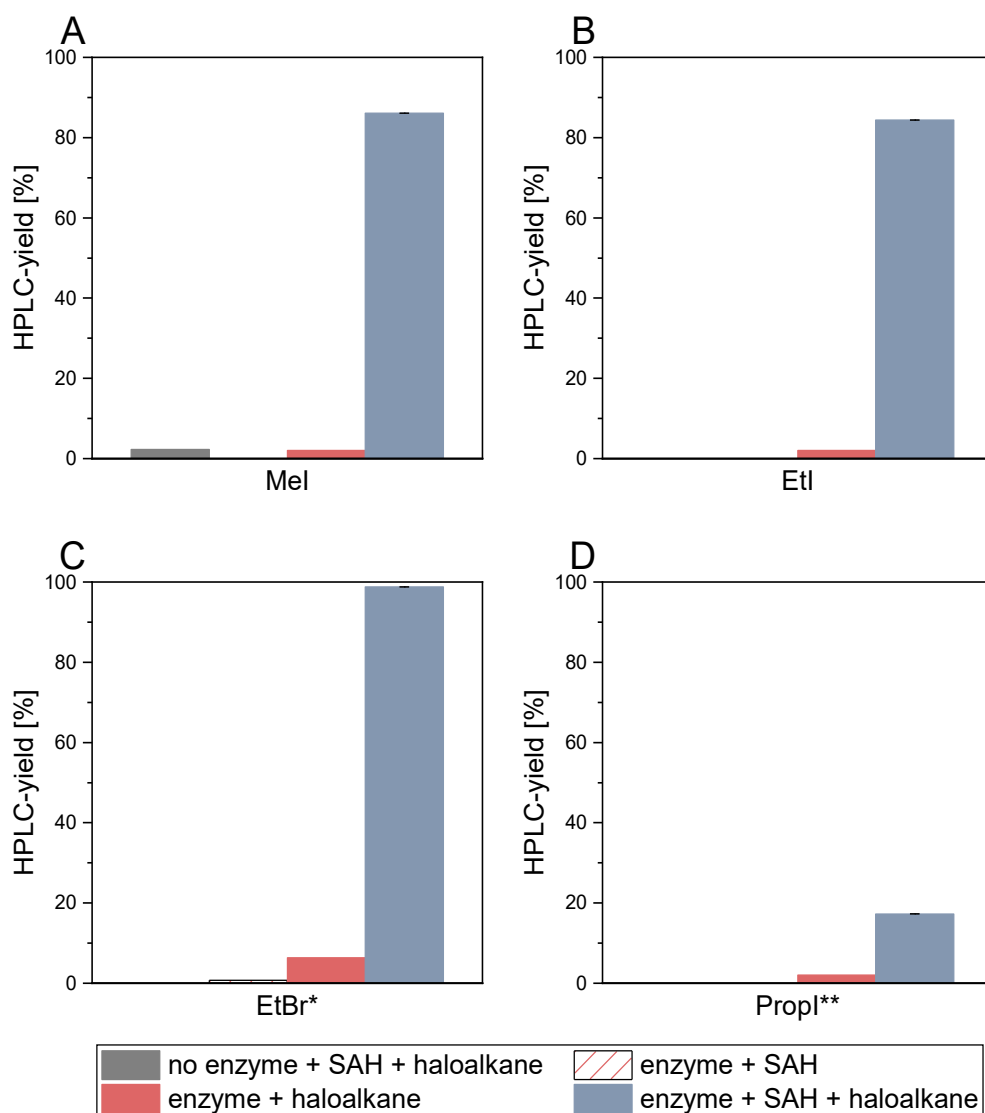

The NSA-synthase catalyzed SAH alkylation and control reactions with **A)** iodomethane (Mel) and **B)** iodoethane (Etl) were proceeded with 1 mM SAH, 10 equivalents of the corresponding haloalkane and 50  $\mu$ M purified enzyme at 25 °C for 20 h as described in paragraph **II.(K)**. **C)** The reaction with bromoethane (EtBr\*) was performed under the same conditions as with Mel and Etl but with 67 equivalents of EtBr in a lysate reaction (245  $\mu$ l lysate instead of purified enzyme). **D)** The reaction with iodopropane (PropI\*\*) was performed similar to the reactions with Mel and Etl as described in paragraph **II.(K)** but with 50 equivalents of PropI. Error bars show standard deviation of at least duplicates. These individual experiments should support that these reactions are enzyme catalyzed and not a non-enzymatic background. To confirm this, we did control experiments for the reactions with each haloalkane substrate without NSA-synthase, but with the addition of SAH and haloalkane. In addition, reactions with NSA-synthase and SAH showed residual SAM that is only observed when lysate was used in the reactions. Further, we investigated the NSA-synthase only treated with haloalkanes. This control experiment reveals the alkylation potency of the co-purified SAH.

**Figure S30:** Time course of NSA formation

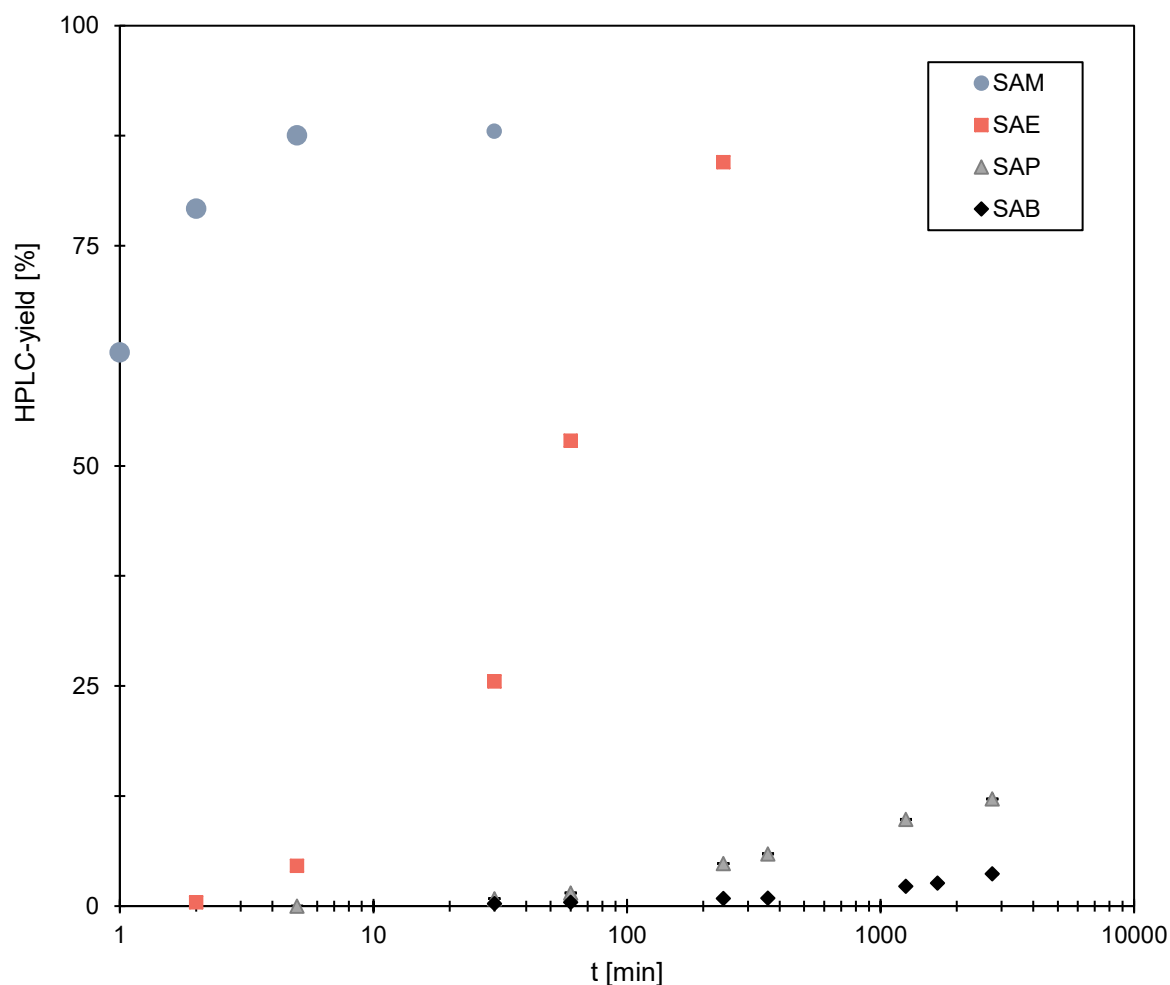

Time course of NSA formation by NSA-synthase. SAM was produced with highest activity with the use of iodomethane, followed by *S*-adenosyl-L-ethionine (SAE, red) with the use of iodoethane and slowest formation of *S*-adenosyl-L-propionine (SAP, grey) and *S*-adenosyl-L-butionine (SAB, black) with the use of iodopropane and iodobutane respectively. 50  $\mu$ M of NSA-synthase, 1 mM SAH and 10 equivalents of each haloalkane were incubated in 500  $\mu$ l reactions at 25°C as described in detail in paragraph II.(K). Error bars present standard deviation of triplicates.

**Figure S31:** Conformation of enzymatically synthesized NSAs by mass spectrometry

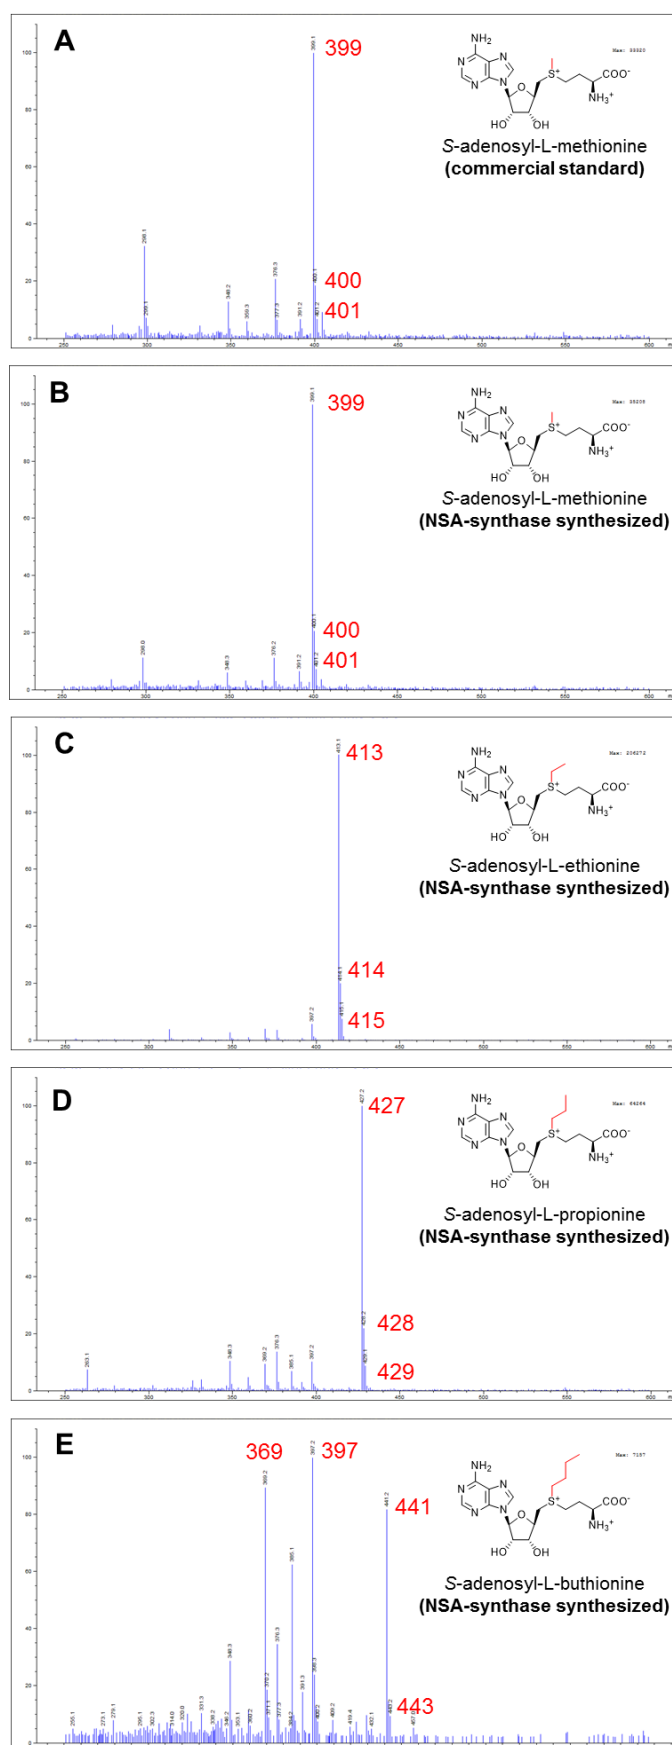

Synthesis of NSAs by NSA-synthase (50  $\mu$ M NSA-synthase, 1 mM SAH, 10 equivalents of haloalkane, 25°C, 20 h) was confirmed by LC-MS measurements using ESI ionization in positive mode (see paragraph II.(E/K)). **A)** Mass spectra of a commercially available S-adenosyl-L-methionine standard. The measured main mass is identical to the theoretical mass of 399.14. **B)** Mass spectra of NSA-synthase synthesized SAM. The mass spectra is similar to the one of the authentic standard. **C)** Mass spectra of NSA-synthase synthesized S-adenosyl-L-ethionine. The main mass is identical to the theoretical mass of 413.16. **D)** Mass spectra of NSA-synthase synthesized S-adenosyl-L-propionine. The main mass is identical to the theoretical mass of 427.18. **E)** Mass spectra of NSA-synthase synthesized S-adenosyl-L-buthionine. We can find a mass hit for m/z 441 that is identical to the theoretical mass of 441.19.

**Figure S32:** Optimization of the cyclic enzyme cascade: SAH-addition

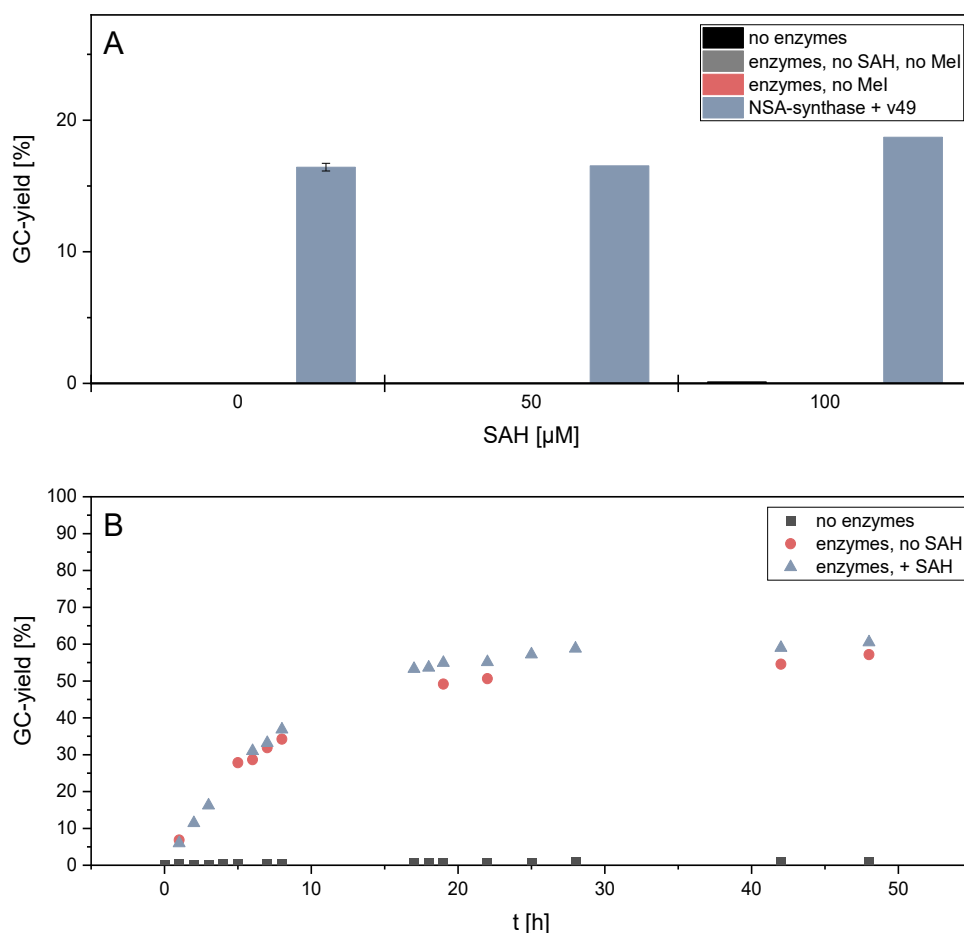

Addition of SAH to the cyclic enzyme cascade reaction of NSA-synthase with FuncLib variants. **A**) Reactions of NSA-synthase and v49 (50  $\mu\text{M}$  each) was performed according to paragraph II.(L) at 37°C for 20 h with 2 mM 3-methylpyrazole (**1**) and 10 equivalents of iodomethane as substrates and variation of the SAH concentration. HPLC measurements (data not shown) showed that the purified enzymes contain residual amounts of co-purified SAH. These amounts of SAH correspond equally to the NSA-synthase concentration in the reactions. Error bar shows standard deviation of duplicates. **B**) Time course of NSA-synthase and v36 (50  $\mu\text{M}$  each) with 2 mM 3-cyclopropyl (**3**) and 10 equivalents of iodomethane as substrates performed at 37°C according to paragraph II.(L). As the deviation of the reactions in presence or absence of SAH is less than 2-5%, we performed the cascade reactions without the addition of SAH.

**Figure S33:** Excess of iodomethane influences the methylation yield

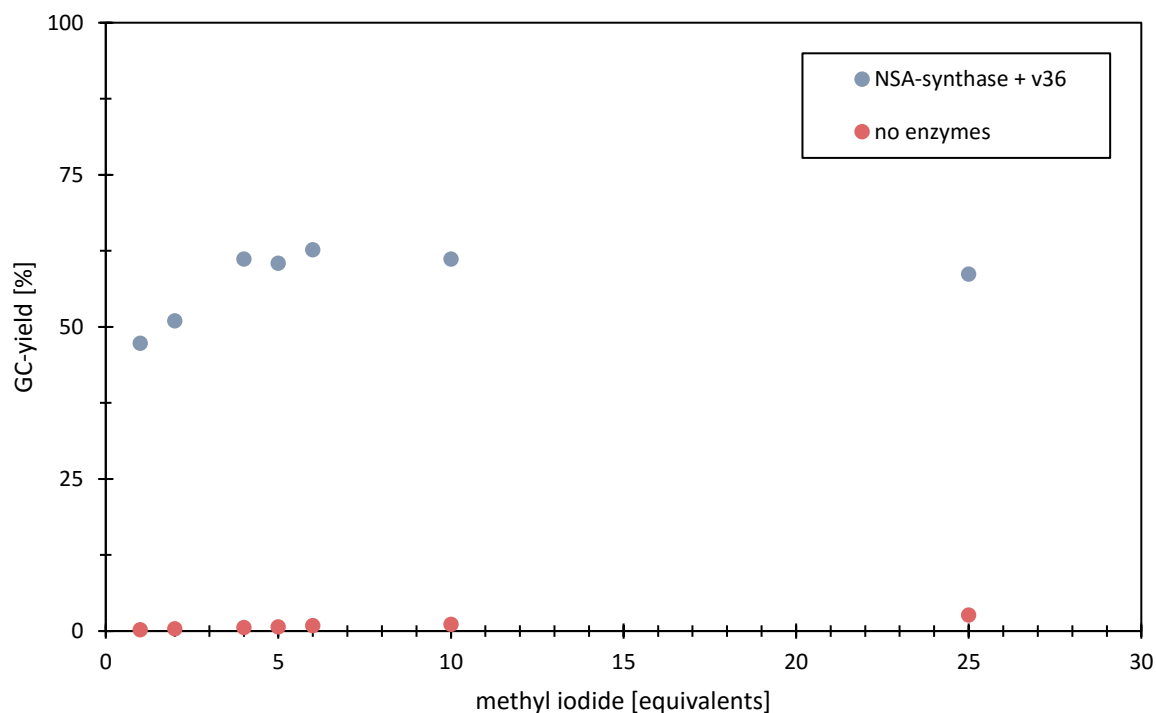

We examined the excess of iodomethane that is necessary to drive the enzyme cascade, with 50  $\mu\text{M}$  of each, NSA-synthase and v36 and 2 mM 3-cyclopropylpyrazole at 37°C for 20 h according to the protocol in paragraph II.(L). Analysis revealed that high amounts of iodomethane (25 equiv. and higher) increases the non-enzymatic background reaction and are not suitable for the enzyme cascade. In between 4 and 10 equivalents, the GC-yield remains constant, leading to around 60% product formation. Equimolar concentrations of iodomethane reduced the product formation only slightly to 47%.

**Figure S34:** Scale-up of enzymatic methylation of 3-cyclopropylpyrazole (**3**) with iodomethane

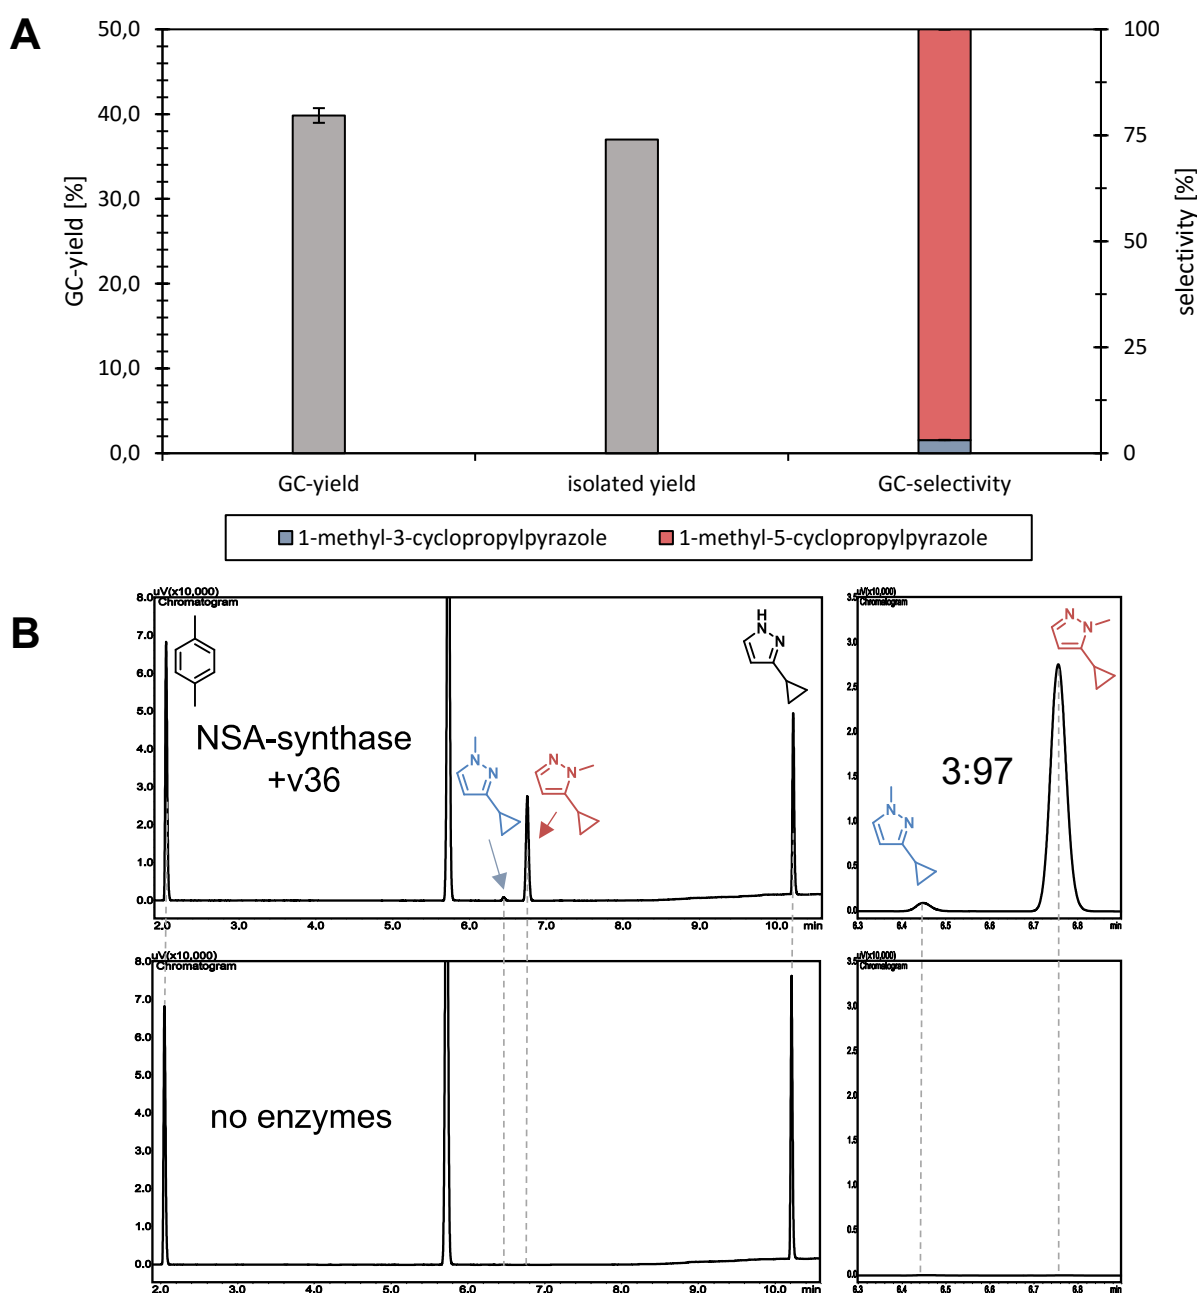

The scale-up of the reaction of NSA-synthase and v36 with 3-cyclopropylpyrazole (**3**) and methyl iodide was proceeded in a 500 ml reaction (x1000 scale-up) with 50  $\mu$ M of NSA-synthase and v36 respectively, 2 mM 3-cyclopropylpyrazole (**3**) and 10 equivalents of iodomethane at 37°C for 30 h as described in paragraph II.(M). **A**) GC- and isolated yield as well the GC-selectivity. 3% of the product yield was lost during purification of the product. Error bars show standard deviation of triplicates. **B**) GC-FID chromatograms of the up-scaled methylation of 3-cyclopropylpyrazole (**3**). Left row shows the full chromatograms of the enzymatic reaction (top) with internal standard p-xylene, DMSO (ret time 5.7), methylated products and substrate in comparison to the control reaction without enzymes (bottom). Chromatograms in the right row are zoomed into the methylated product peaks for better visualization of the GC-selectivities. Control reaction reveals that no non-enzymatic reaction occurred.

**Figure S35:** Enzymatic ethylation of 3-cyclopropylpyrazole (**3**) using iodoethane

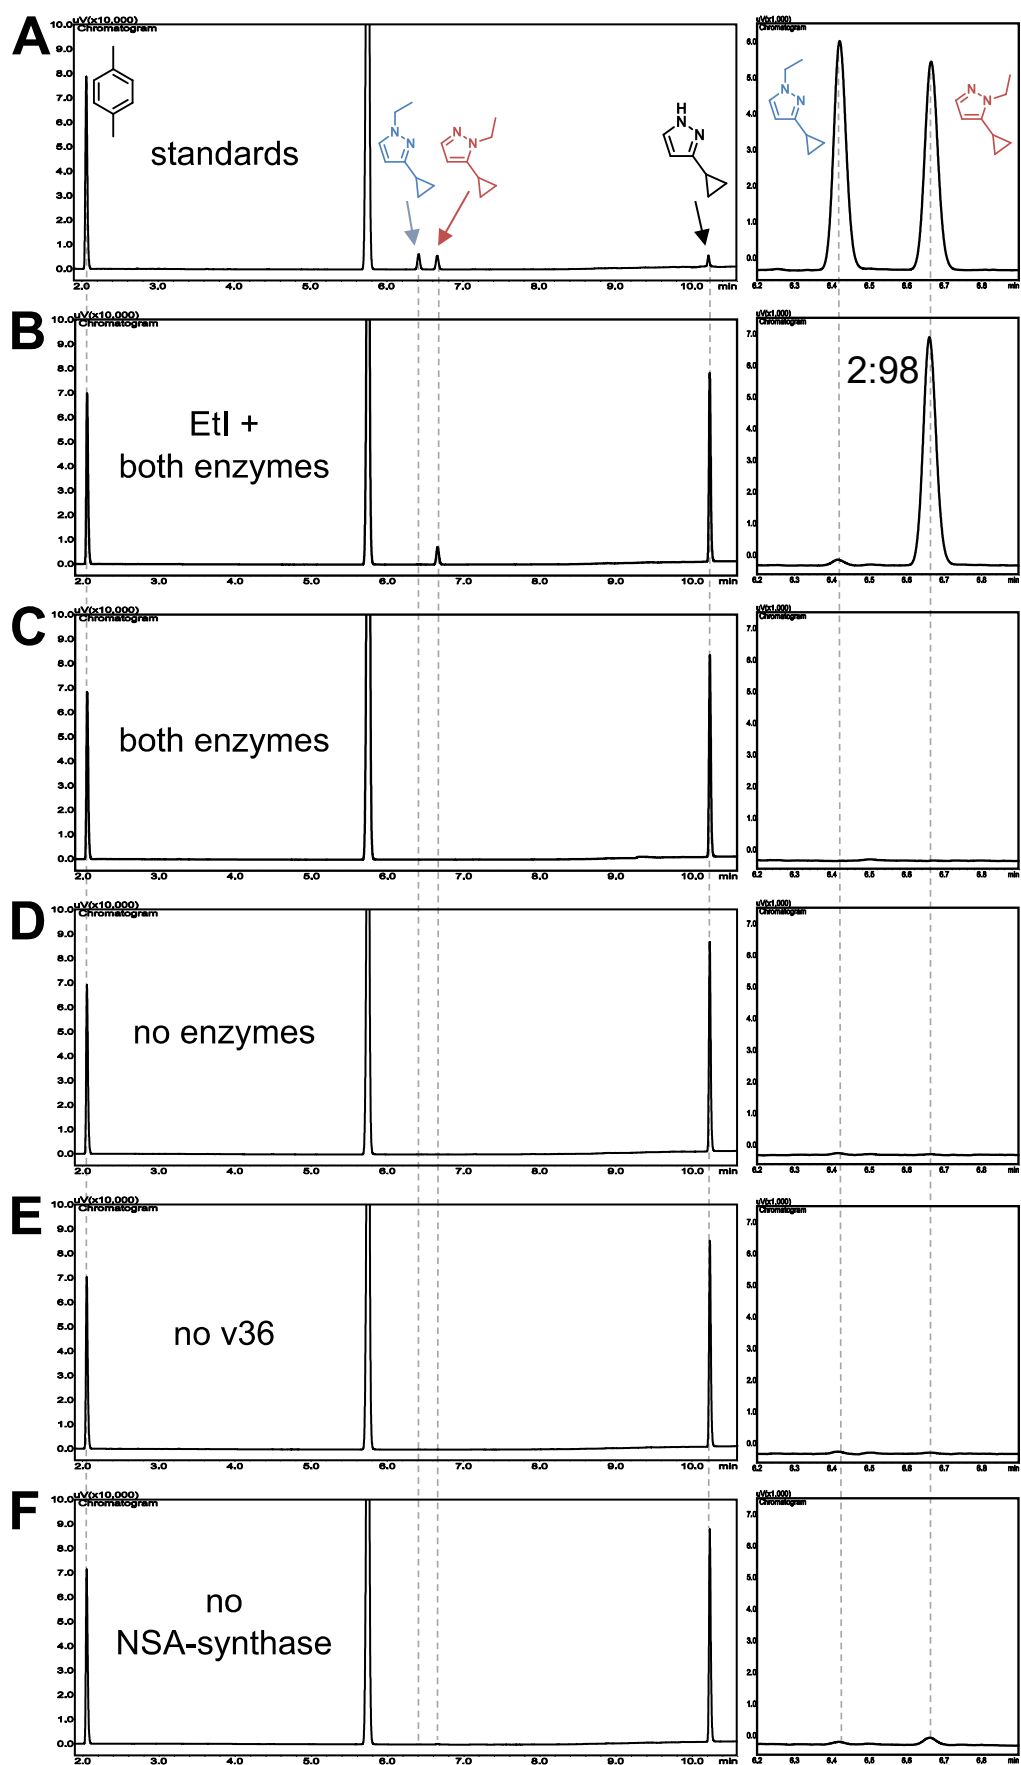



Comparison of GC-FID chromatograms (full chromatograms in the left row, zoom into product peaks in the right row) of **(A)** standard compounds (internal standard p-xylene, ethylated products, 3-cyclopropylpyrazole **(3)**, DMSO at ret. time 5.75 min), **(B)** the product of selective enzymatic ethylation, using iodoethane (Etl). **(C)** The control reaction with both enzymes, but without Etl shows no product formation that proves that no methylation occurs. **(D)** The controls with Etl but without both enzymes, **(E)** without v36 and **(F)** without NSA-synthase reveal that the reaction is enzyme catalyzed. The reaction was performed using 50  $\mu\text{M}$  of NSA-synthase and v36 respectively, 2 mM 3-cyclopropylpyrazole and 10 equivalents of iodoethane at 30°C for 72 h.

**Figure S36:** Enzymatic propylation of 3-cyclopropylpyrazole (**3**) using 1-iodopropane

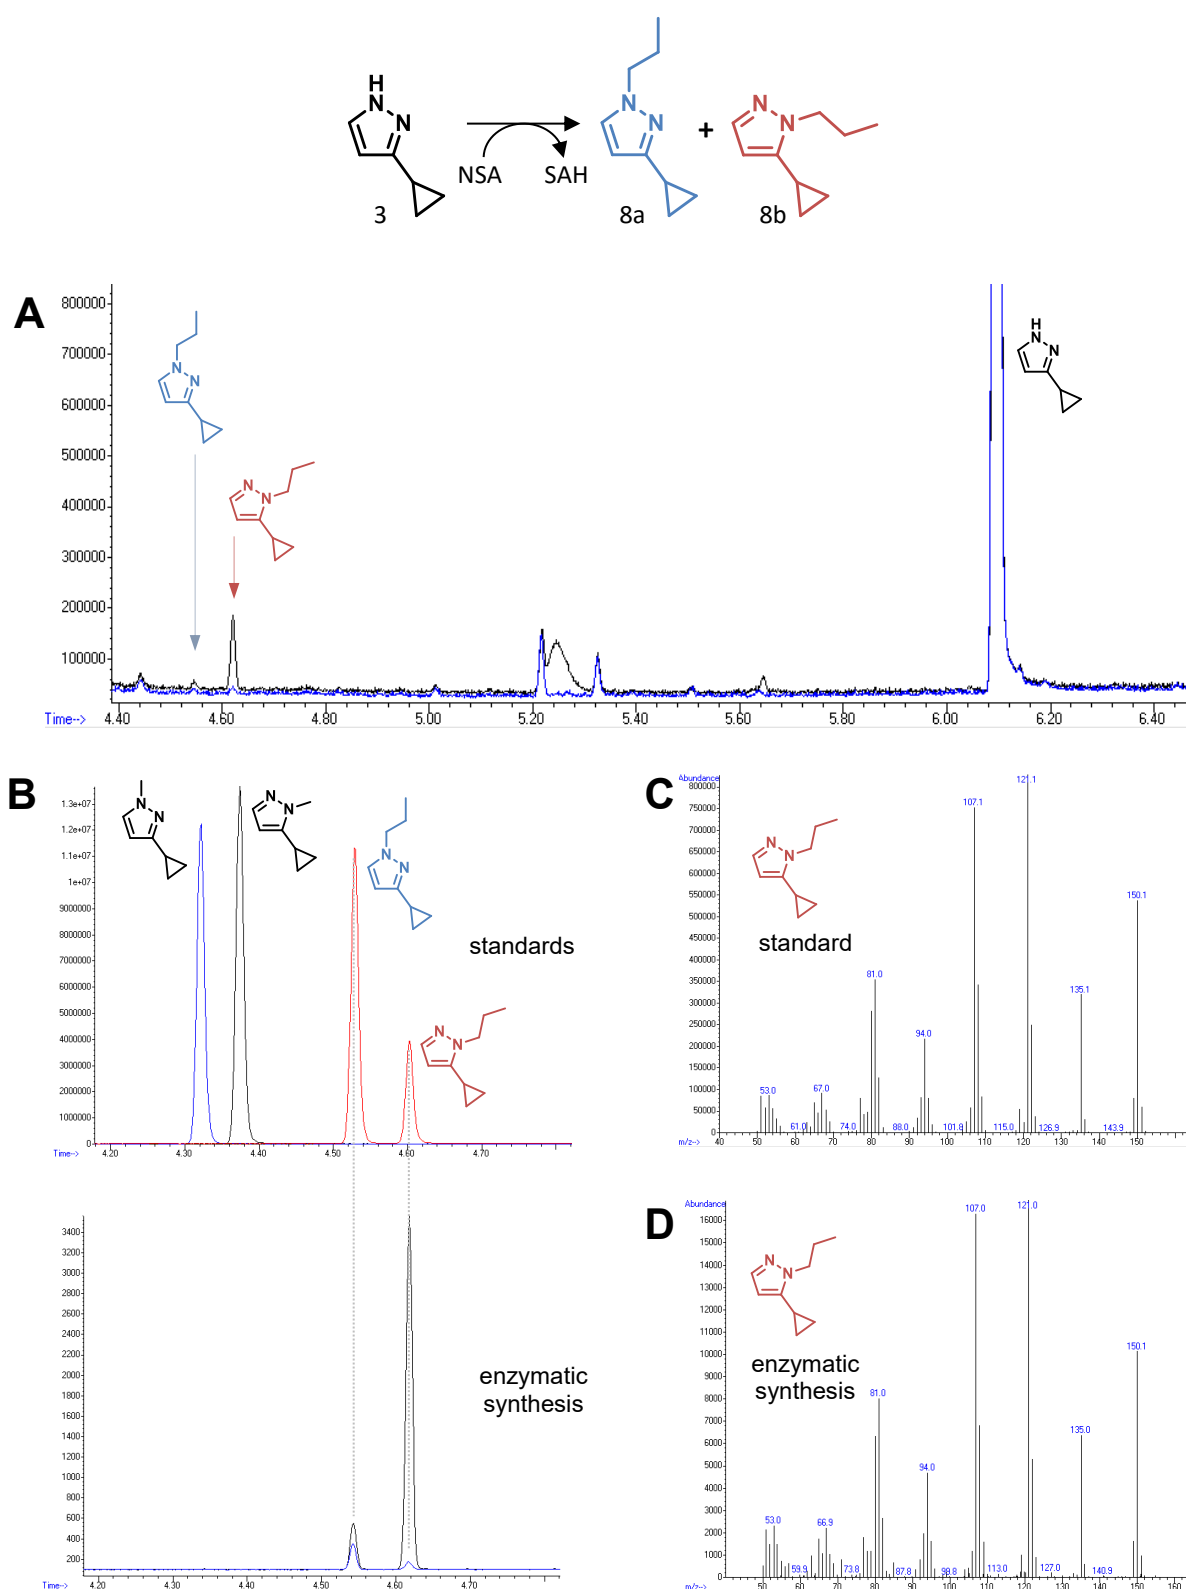

**A)** GC-MS Scan chromatogram of enzymatic propylation of 3-cyclopropylpyrazole (**3**) using iodopropane (black) compared to the control reaction without enzymes (blue) and **B)** comparison of GC-MS SIM chromatograms of standard compounds (top) with the product of selective enzymatic propylation using propyl iodide (bottom). The reaction was with 75  $\mu$ M NSA-synthase and 75  $\mu$ M v36, 1 mM SAH, 2 mM 3-cyclopropylpyrazole (**3**) and 10 equivalents iodopropane at 30°C for 50 h. The chromatogram of the standards (top) also

show the retention of the methylated compounds to proof that methylation is not observed in the enzymatic reaction. The chromatogram of the enzymatic reaction (bottom) shows the enzyme-catalyzed reaction (black) in comparison with the control experiment (without enzyme in blue). This reveals that there is a non-selective, non-enzyme-catalyzed background reaction. **C**) and **D**) show the corresponding MS spectra for the enzyme-catalyzed selective synthesis of 5-cyclopropyl-1-propyl-pyrazole (**D**) in comparison to the authentic standard (**C**). Scan measurements were performed with the same chromatography as it is described in paragraph I.**(D)5**.

#### IV. Calibration curves for initial rate measurements, enzymatic ethylation and propylation

All calibration curves were measured from 3 single weighted standards and measured via GC-FID. The calibration curves of 1-propyl-3-cyclopropylpyrazole (**8a**) and 1-propyl-5-cyclopropylpyrazole (**8b**) were measured via GC-MS.

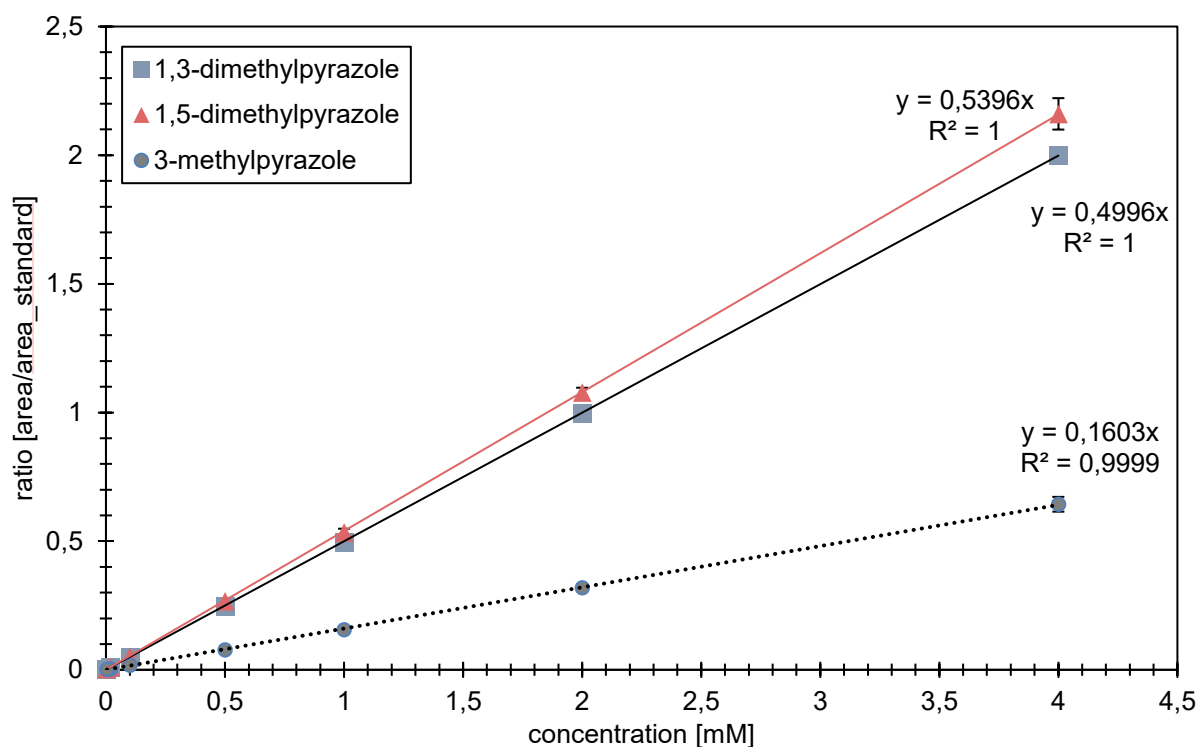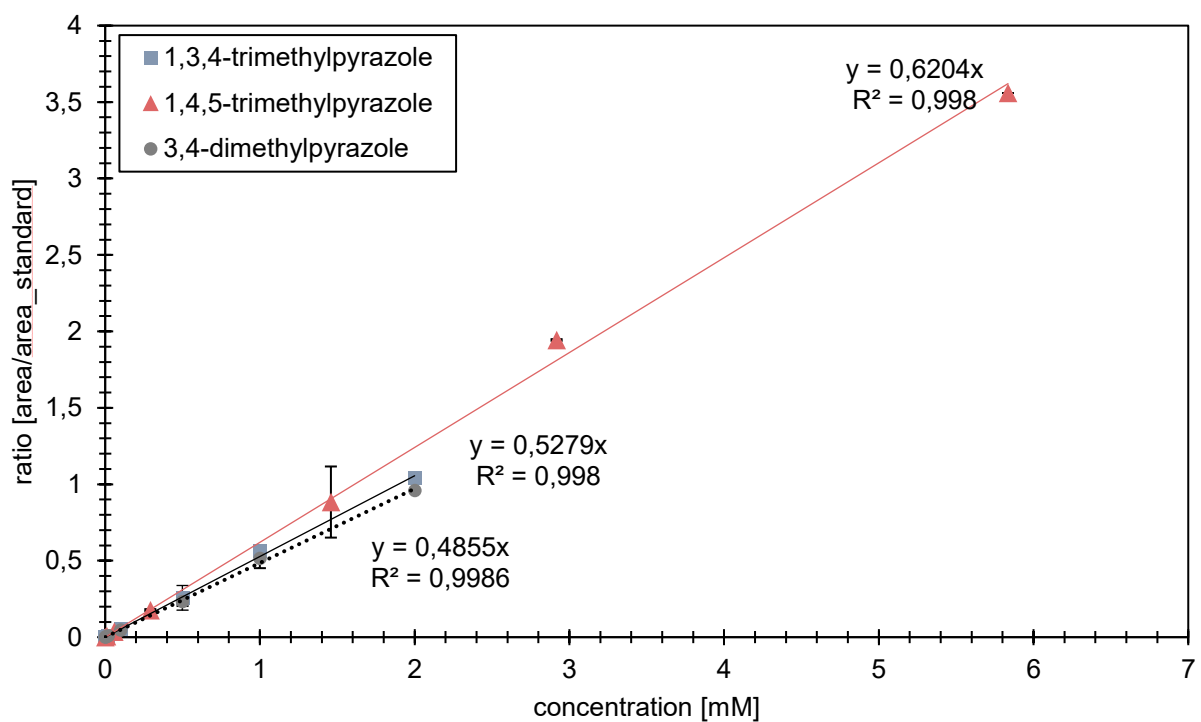

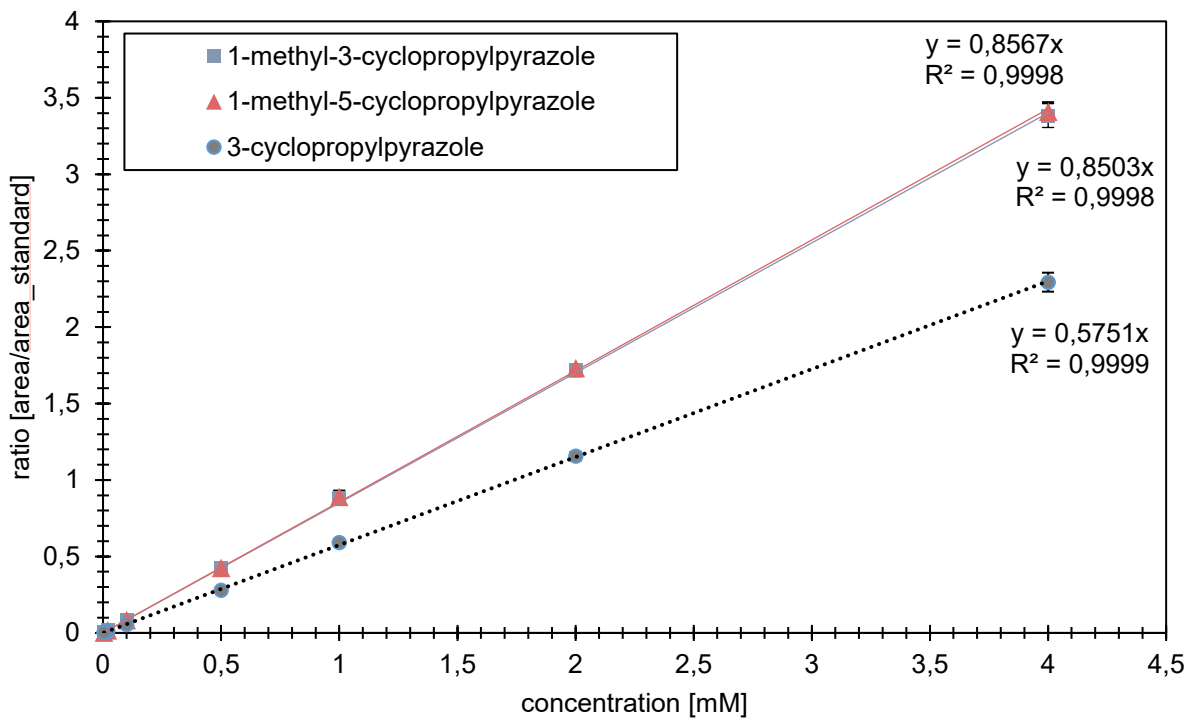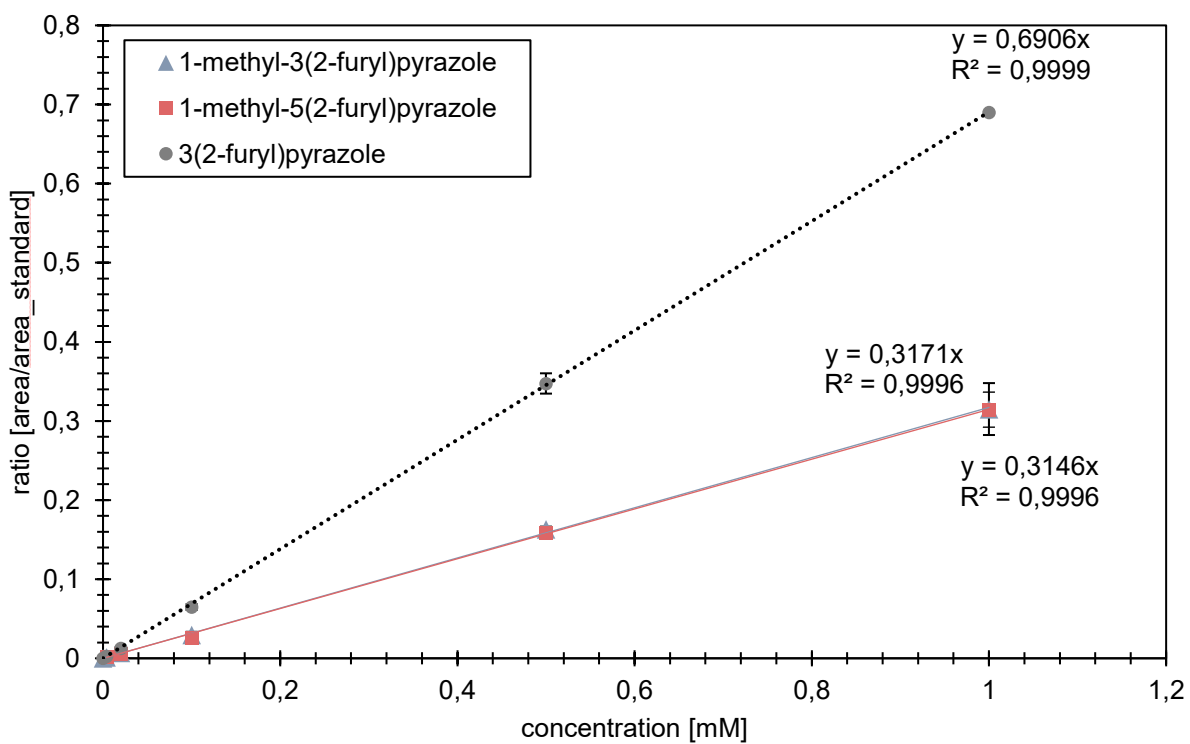

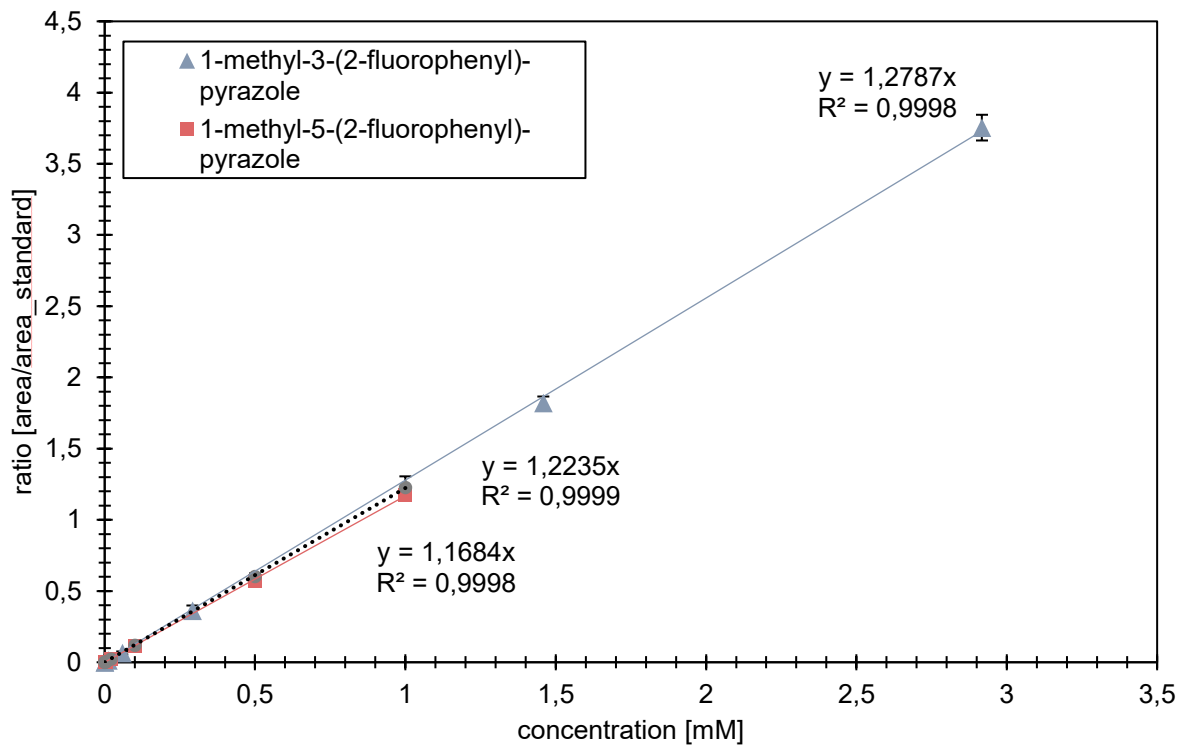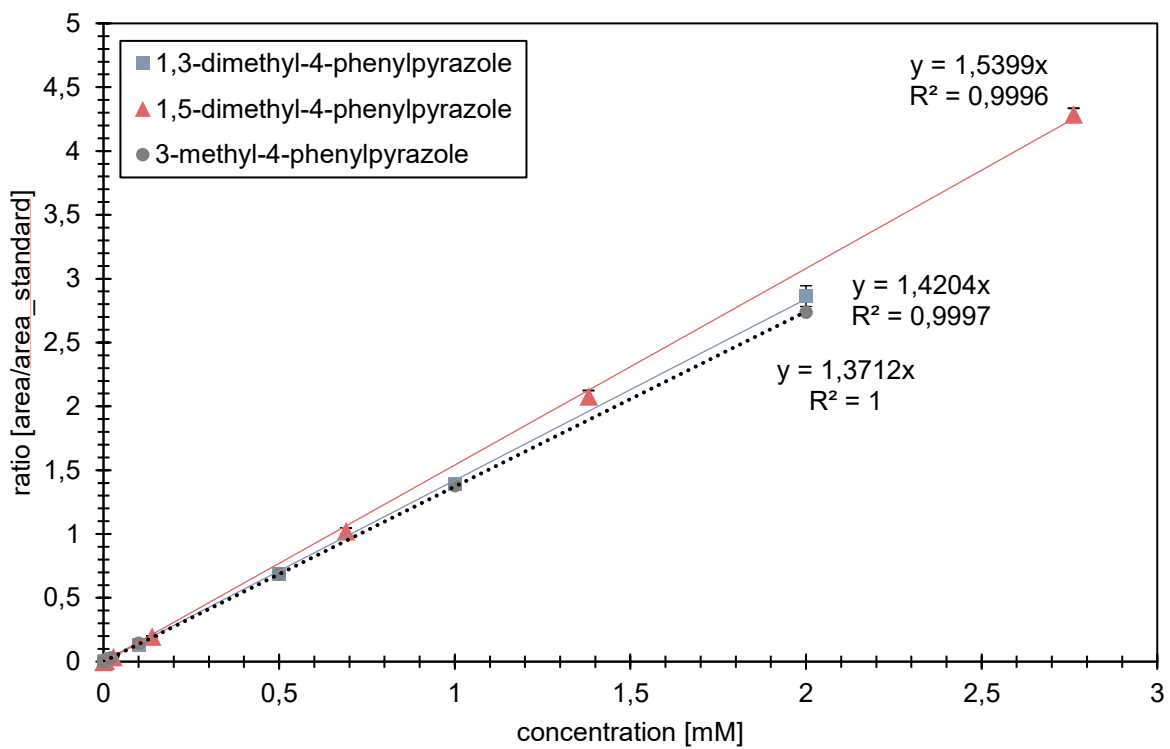

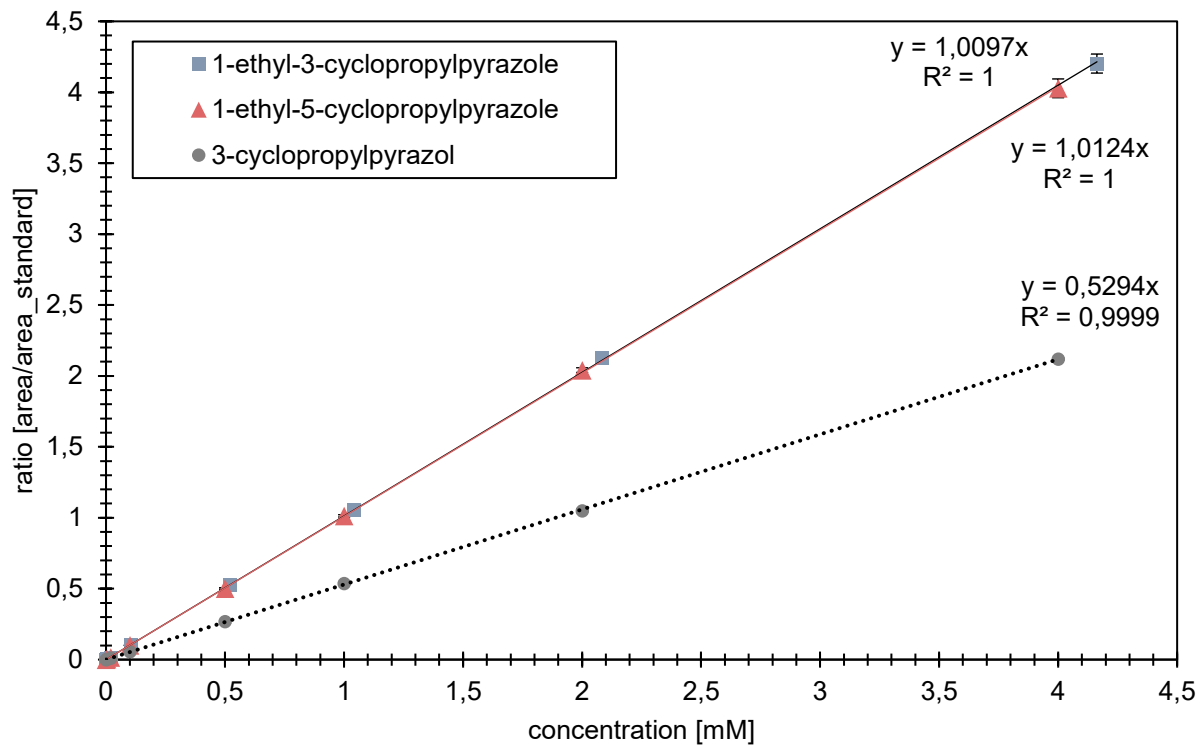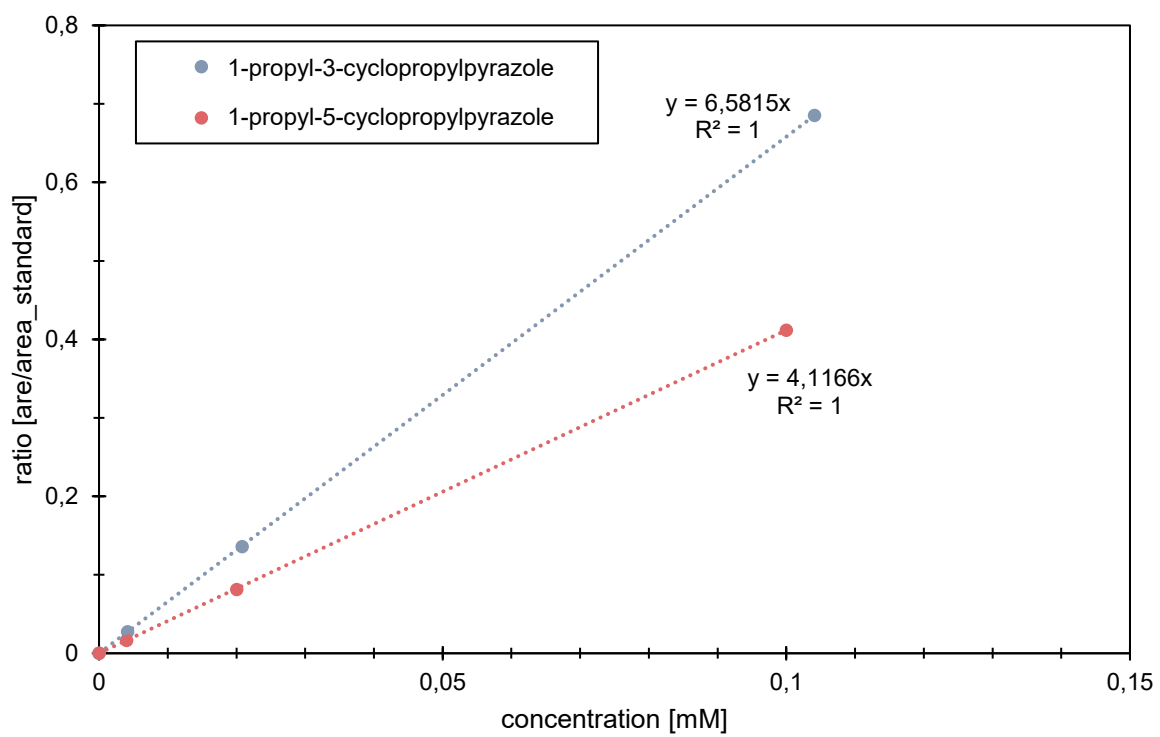

## V. Chemical synthesis of product standards

All product standards were synthesized following the protocol from paragraph II.(O).

### 1,3-dimethylpyrazole (1a):

The reaction was performed on 0.12 mmol scale and the crude product was compared to commercially available standards and used for selectivity measurements. NMR Data is derived from the commercial standard. **NMR Data:**  $^1\text{H}$  NMR (500 MHz,  $\text{CDCl}_3$ )  $\delta$  7.21 (d,  $J$  = 2.3 Hz, 1H), 5.99 (d,  $J$  = 2.3 Hz, 1H), 3.82 (s, 3H), 2.26 (s, 3H).  $^{13}\text{C}$  NMR (126 MHz,  $\text{CDCl}_3$ )  $\delta$  148.66, 130.71, 105.12, 38.63, 13.59. HRESIMS  $m/z$  97.0765 (calculated for  $\text{C}_5\text{H}_8\text{N}_2$  97.0760).

### 1,5-dimethylpyrazole (1b):

The reaction was performed on 0.12 mmol scale and the crude product was compared to commercially available standards and used for selectivity measurements. NMR Data is derived from the commercial standard. **NMR Data:**  $^1\text{H}$  NMR (500 MHz,  $\text{CDCl}_3$ )  $\delta$  7.35 (d,  $J$  = 1.8 Hz, 1H), 6.00 (d,  $J$  = 1.8 Hz, 1H), 3.78 (s, 3H), 2.27 (s, 3H).  $^{13}\text{C}$  NMR (126 MHz,  $\text{CDCl}_3$ )  $\delta$  138.28, 138.12, 105.24, 36.13, 11.23. HRESIMS  $m/z$  97.0768 (calculated for  $\text{C}_5\text{H}_8\text{N}_2$  97.0760).

### 1,3,4-trimethylpyrazole (2a), 1,4,5-trimethylpyrazole (2b):

The reaction was performed on 1.6 mmol scale. The product mixture was purified by column chromatography (3:1 ethyl acetate/cyclohexane). Isolated 39,99 mg. Product standard is mixture of 1,3,4- and 1,4,5-trimethyl-pyrazole (molar ratio 25.5 : 74.5). **NMR Data:**  $^1\text{H}$  NMR (500 MHz,  $\text{CDCl}_3$ )  $\delta$  7.20 (s, 1H), 7.02 (s, 1H), 3.75 (s, 3H), 3.73 (s, 3H), 2.16 (s, 3H), 2.14 (s, 3H), 1.96 (s, 3H + 3H).  $^{13}\text{C}$  NMR (126 MHz,  $\text{CDCl}_3$ )  $\delta$  147.23, 138.30, 135.53, 129.36, 113.96, 113.36, 38.41, 36.36, 11.56, 9.28, 8.82, 8.37. NMR spectrum of 1,3,4-trimethylpyrazole is in accordance with literature.<sup>[20]</sup> HRESIMS  $m/z$  111.0936 (calculated for  $\text{C}_6\text{H}_{10}\text{N}_2$  111.0917).

### 1-methyl-3-cyclopropylpyrazole (3a):

The reaction was performed on 0.1 mmol scale and the crude product was compared to commercially available standards and used for selectivity measurements. NMR Data is derived from the commercial standard. **NMR Data:**  $^1\text{H}$  NMR (500 MHz,  $\text{CDCl}_3$ )  $\delta$  7.19 (d,  $J$  = 2.4 Hz, 1H), 5.86 (d,  $J$  = 2.5 Hz, 1H), 3.81 (s, 3H), 1.96 – 1.87 (m, 1H), 0.92 – 0.85 (m, 2H), 0.72 – 0.66 (m, 2H).  $^{13}\text{C}$  NMR (126 MHz,  $\text{CDCl}_3$ )  $\delta$  155.34, 130.64, 101.77, 38.71, 9.22, 7.96 (2C). HRESIMS  $m/z$  123.0920 (calculated for  $\text{C}_7\text{H}_{10}\text{N}_2$  123.0917).



**1-methyl-5-cyclopropylpyrazole (3b):**

The reaction was performed on 0.1 mmol scale and the crude product was compared to commercial available standards and used for selectivity measurements. NMR Data is derived from the commercially standard. **NMR Data:**  $^1\text{H}$  NMR (500 MHz,  $\text{CDCl}_3$ )  $\delta$  7.33 (d,  $J = 1.8$  Hz, 1H), 5.82 (d,  $J = 1.8$  Hz, 1H), 3.89 (s, 3H), 1.75 – 1.66 (m, 1H), 1.00 – 0.92 (m, 2H), 0.68 – 0.61 (m, 2H).  $^{13}\text{C}$  NMR (126 MHz,  $\text{CDCl}_3$ )  $\delta$  145.08, 137.97, 102.54, 36.33, 6.84 (2C), 6.23. HRESIMS  $m/z$  123.0920 (calculated for  $\text{C}_7\text{H}_{10}\text{N}_2$  123.0917).

**1-ethyl-3-cyclopropylpyrazole (7a):**

The reaction was performed on 4.5 mmol scale. The product was purified by column chromatography (1:1 ethyl acetate/cyclohexane). Isolated 7.53 mg. **NMR Data:**  $^1\text{H}$  NMR (500 MHz,  $\text{CDCl}_3$ )  $\delta$  7.24 (d,  $J = 2.2$  Hz, 1H), 5.85 (d,  $J = 2.5$  Hz, 1H), 4.09 (q,  $J = 7.4$  Hz, 2H), 1.99 – 1.89 (m, 1H), 1.46 (t,  $J = 7.5$  Hz, 3H), 0.92 – 0.88 (m, 2H), 0.71 – 0.68 (m, 2H).  $^{13}\text{C}$  NMR (126 MHz,  $\text{CDCl}_3$ )  $\delta$  155.04, 128.86, 101.23, 46.77, 15.74, 9.30, 8.04 (2C). HRESIMS  $m/z$  137.1079 (calculated for  $\text{C}_8\text{H}_{12}\text{N}_2$  137.1073).

**1-ethyl-5-cyclopropylpyrazole (7b):**

The reaction was performed on 4.5 mmol scale. The product was purified by column chromatography (1:1 ethyl acetate/cyclohexane). Isolated 20.05 mg. **NMR Data:**  $^1\text{H}$  NMR (500 MHz,  $\text{CDCl}_3$ )  $\delta$  7.34 (d,  $J = 2.1$  Hz, 1H), 5.80 (d,  $J = 1.8$  Hz, 1H), 4.23 (q,  $J = 7.0$  Hz, 2H), 1.76 – 1.67 (m, 1H), 1.44 (t,  $J = 7.3$  Hz, 3H), 0.98 – 0.92 (m, 2H), 0.67 – 0.63 (m, 2H).  $^{13}\text{C}$  NMR (126 MHz,  $\text{CDCl}_3$ )  $\delta$  144.28, 138.02, 102.32, 44.08, 15.52, 6.96 (2C), 6.14. HRESIMS  $m/z$  137.1073 (calculated for  $\text{C}_8\text{H}_{12}\text{N}_2$  137.1073). Purity 56%:36%:9% 1-ethyl-5-cyclopropylpyrazole:ethyl acetate:cyclohexane.

**1-propyl-3-cyclopropylpyrazole (8a):**

The reaction was performed on 4.5 mmol scale. The product was purified by column chromatography (1:3 ethyl acetate/cyclohexane). Isolated 270.1 mg. **NMR Data:**  $^1\text{H}$  NMR (500 MHz,  $\text{CDCl}_3$ )  $\delta$  7.22 (d,  $J = 2.4$  Hz, 1H), 5.84 (d,  $J = 1.9$ , 1H), 3.98 (t,  $J = 7.3$  Hz, 2H), 1.92 – 1.88 (m, 1H), 1.87 – 1.81 (m, 2H), 0.95 – 0.86 (m, 2H and t, 3H), 0.70 – 0.68 (m, 2H).  $^{13}\text{C}$  NMR (126 MHz,  $\text{CDCl}_3$ )  $\delta$  155.05, 129.62, 101.01, 53.74, 23.92, 11.31, 9.33, 8.03 (2C). HRESIMS  $m/z$  151.1232 (calculated for  $\text{C}_9\text{H}_{14}\text{N}_2$  151.1230). 1-propyl-3-cyclopropyl-pyrazole is contaminated with the regioisomer 5-cyclopropyl-1-propyl pyrazole with the molar ratio 73:27.

### 1-propyl-5-cyclopropylpyrazole:

The reaction was performed on 4.5 mmol scale. The product was purified by column chromatography (1:3 ethyl acetate/cyclohexane). Isolated 28.2 mg. **NMR Data:**  $^1\text{H}$  NMR (500 MHz,  $\text{CDCl}_3$ )  $\delta$  7.35 (d,  $J = 1.9$  Hz, 1H), 5.80 (d,  $J = 1.7$ , 1H), 4.17 – 4.11 (t,  $J = 7.1$ , 2H), 1.93 – 1.86 (m, 2H), 1.72 (m, 1H), 0.98 – 0.85 (m, 2H and t, 3H), 0.67 – 0.64 (m, 2H).  $^{13}\text{C}$  NMR (126 MHz,  $\text{CDCl}_3$ )  $\delta$  144.78, 138.01, 102.04, 50.79, 23.70, 11.41, 7.17 (2C), 6.27. HRESIMS  $m/z$  151.1231 (calculated for  $\text{C}_9\text{H}_{14}\text{N}_2$  151.1230)

### 1-methyl-3(2-furyl)pyrazole (5a):

The reaction was performed on 0.72 mmol scale. The product was purified by column chromatography (1:9 ethyl acetate/cyclohexane). Isolated 13.63 mg. **NMR Data:**  $^1\text{H}$  NMR (500 MHz,  $\text{CDCl}_3$ )  $\delta$  7.43 (d,  $J = 1.9$  Hz, 1H), 7.34 (d,  $J = 2.4$  Hz, 1H), 6.62 (d,  $J = 3.3$  Hz, 1H), 6.45 (d,  $J = 2.5$  Hz, 1H), 6.44 (dd,  $J = 3.3, 1.9$  Hz, 1H), 3.93 (s, 3H).  $^{13}\text{C}$  NMR (126 MHz,  $\text{CDCl}_3$ )  $\delta$  149.08, 144.13, 141.73, 131.18, 111.32, 105.39, 102.86, 39.16. HRESIMS  $m/z$  149.0719 (calculated for  $\text{C}_8\text{H}_8\text{N}_2\text{O}$  149.0709).

### 1-methyl-5(2-furyl)pyrazole (5b):

The reaction was performed on 0.72 mmol scale. The product was purified by column chromatography (1:9 ethyl acetate/cyclohexane). Isolated 85.5 mg. **NMR Data:**  $^1\text{H}$  NMR (500 MHz,  $\text{CDCl}_3$ )  $\delta$  7.51 (d,  $J = 1.9$  Hz, 1H), 7.45 (d,  $J = 1.9$  Hz, 1H), 6.55 (d,  $J = 3.4$  Hz, 1H), 6.50 (dd,  $J = 3.1, 1.8$  Hz, 1H), 6.47 (d,  $J = 1.9$  Hz, 1H), 4.05 (s, 3H).  $^{13}\text{C}$  NMR (126 MHz,  $\text{CDCl}_3$ )  $\delta$  145.13, 142.70, 138.55, 134.15, 111.53, 108.44, 105.12, 38.72. NMR data are in accordance with literature.<sup>[21]</sup> HRESIMS  $m/z$  149.0715 (calculated for  $\text{C}_8\text{H}_8\text{N}_2\text{O}$  149.0709).

### 1-methyl-3(2-fluorophenyl)pyrazole (5a):

The reaction was performed on 0.6 mmol scale. The product mixture was purified by column chromatography (1:9 ethyl acetate/cyclohexane). Isolated 19.95 mg. **NMR Data:**  $^1\text{H}$  NMR (500 MHz,  $\text{CDCl}_3$ )  $\delta$  7.97 (td,  $J = 7.7, 1.9$  Hz, 1H), 7.40 (d,  $J = 2.5$  Hz, 1H), 7.30 – 7.21 (m, 1H), 7.17 (t,  $J = 7.5$  Hz, 1H), 7.11 (dd,  $J = 11.5, 8.2$  Hz, 1H), 6.69 (dd,  $J = 4.0, 2.2$  Hz, 1H), 3.96 (s, 3H).  $^{13}\text{C}$  NMR (126 MHz,  $\text{CDCl}_3$ )  $\delta$  161.14, 159.15, 146.20, 131.20, 128.95, 128.42, 124.31, 121.55, 121.45, 116.05, 106.58, 39.21. HRESIMS  $m/z$  177.0823 (calculated for  $\text{C}_{10}\text{H}_9\text{F}_1\text{N}_2$  177.0823).

### 1-methyl-5(2-fluorophenyl)pyrazole (5b):

The reaction was performed on 0.6 mmol scale. The product mixture was purified by column chromatography (1:9 ethyl acetate/cyclohexane). Isolated 70.92 mg. Product standard is mixture of 1-methyl-3- and 1-methyl-5(fluorophenyl)-pyrazole (molar ratio 76 : 24). HRESIMS  $m/z$  177.0826 (calculated for  $\text{C}_{10}\text{H}_9\text{F}_1\text{N}_2$  177.0823).

**1,5-dimethyl-4-phenylpyrazole (6b):**

The reaction was performed on 0.63 mmol scale. The product was purified by column chromatography (1:9 ethyl acetate/cyclohexane). Isolated 6.34 mg. **NMR Data:**  $^1\text{H}$  NMR (500 MHz,  $\text{CDCl}_3$ )  $\delta$  7.56 (s, 1H), 7.44 – 7.33 (m, 4H), 7.30 – 7.22 (m, 1H), 3.85 (s, 3H), 2.38 (s, 3H).  $^{13}\text{C}$  NMR (126 MHz,  $\text{CDCl}_3$ )  $\delta$  137.37, 135.19, 134.13, 128.77, 127.85, 126.23, 120.95, 36.65, 10.51. HRESIMS  $m/z$  173.1073 (calculated for  $\text{C}_{11}\text{H}_{12}\text{N}_2$  173.1073). Purity: The sample contains 90.8% 1,5-dimethyl-4-phenyl-pyrazole and 9.2% 1,3-dimethyl-4-phenyl-pyrazole.

**1,3-dimethyl-4-phenylpyrazole (6a):**

The reaction was performed on 0.63 mmol scale. The product mixture was purified by column chromatography (1:9 ethyl acetate/cyclohexane). Isolated 65.37 mg. Product standard is mixture of 1,3-dimethyl- and 1,5-dimethyl-4-phenyl-pyrazole (molar ratio 42 : 58). HRESIMS  $m/z$  173.1077 (calculated for  $\text{C}_{11}\text{H}_{12}\text{N}_2$  173.1073).

## VI. NMR spectra of product standards

### 1,3-dimethylpyrazole (1a, commercial standard):

#### <sup>1</sup>H-NMR

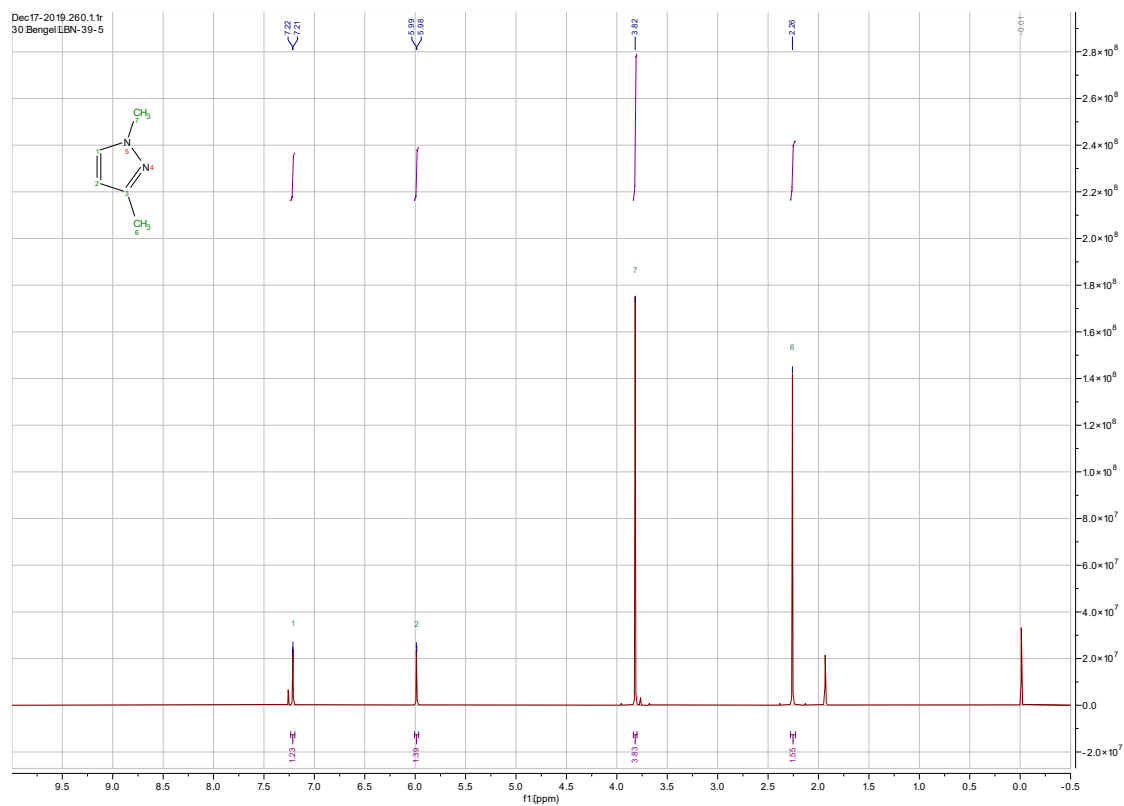

#### <sup>13</sup>C-NMR

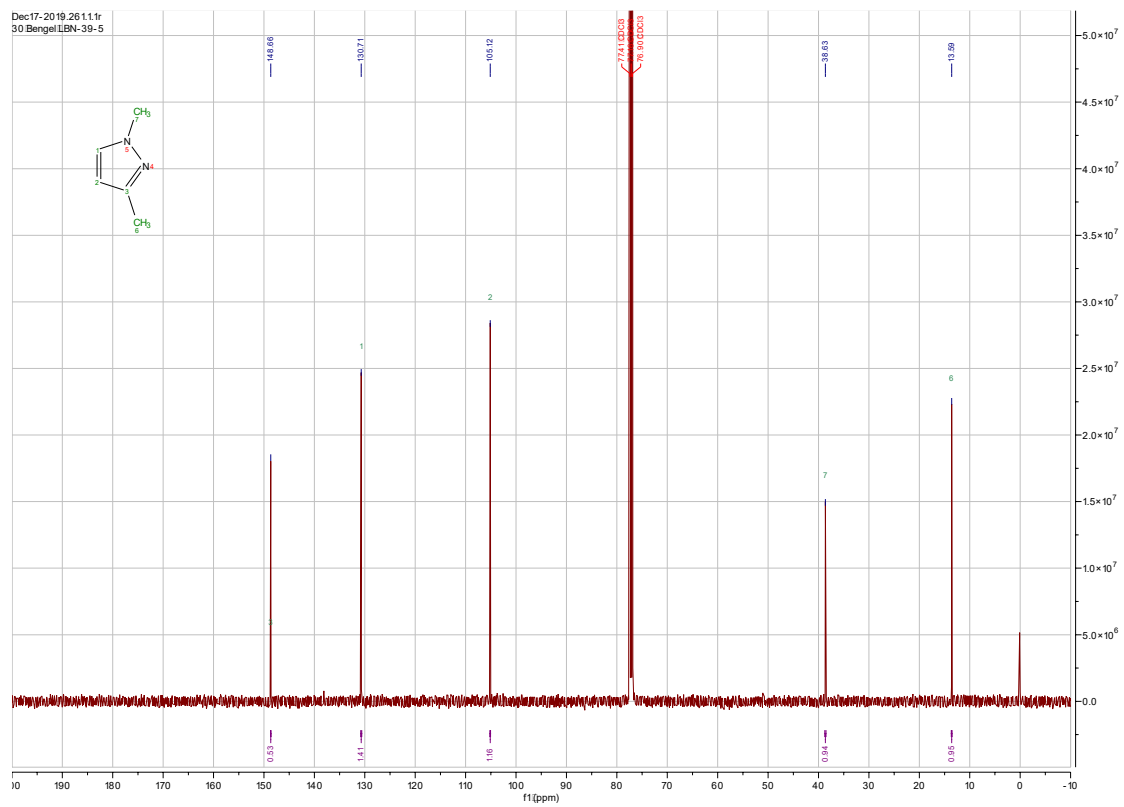

# 1,5-dimethylpyrazole (1b, commercial standard):

## <sup>1</sup>H-NMR

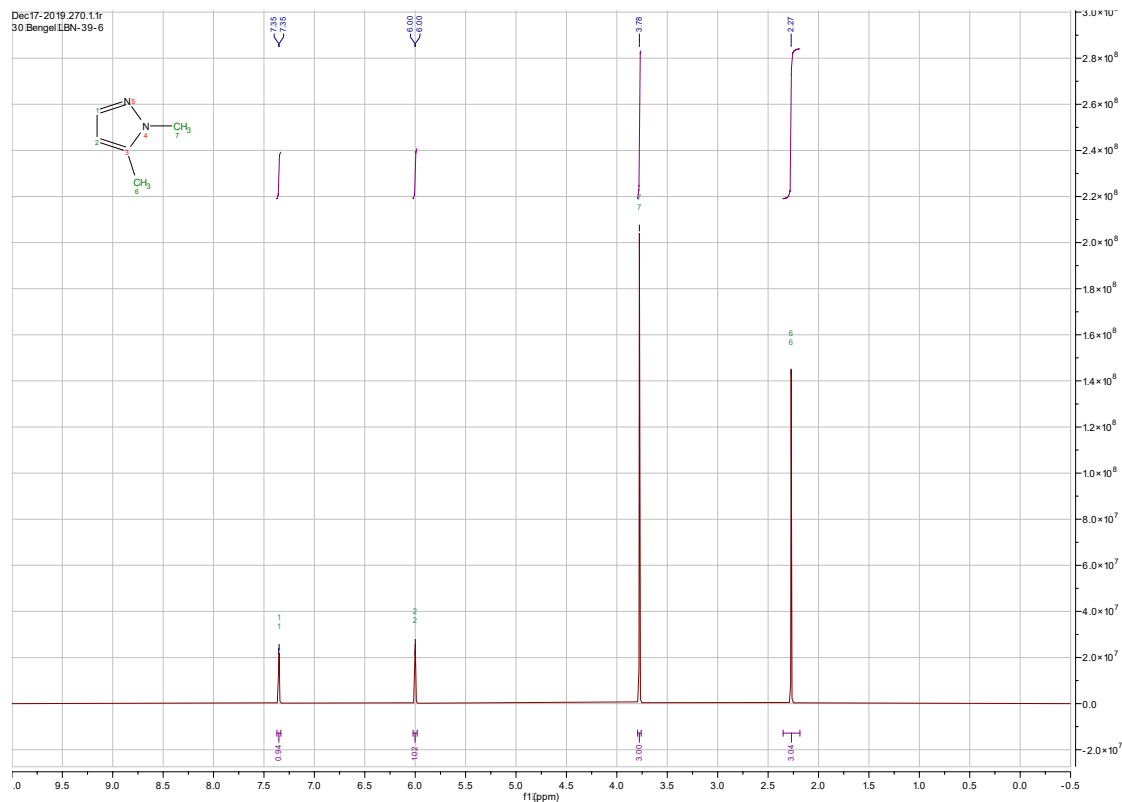

## <sup>13</sup>C-NMR

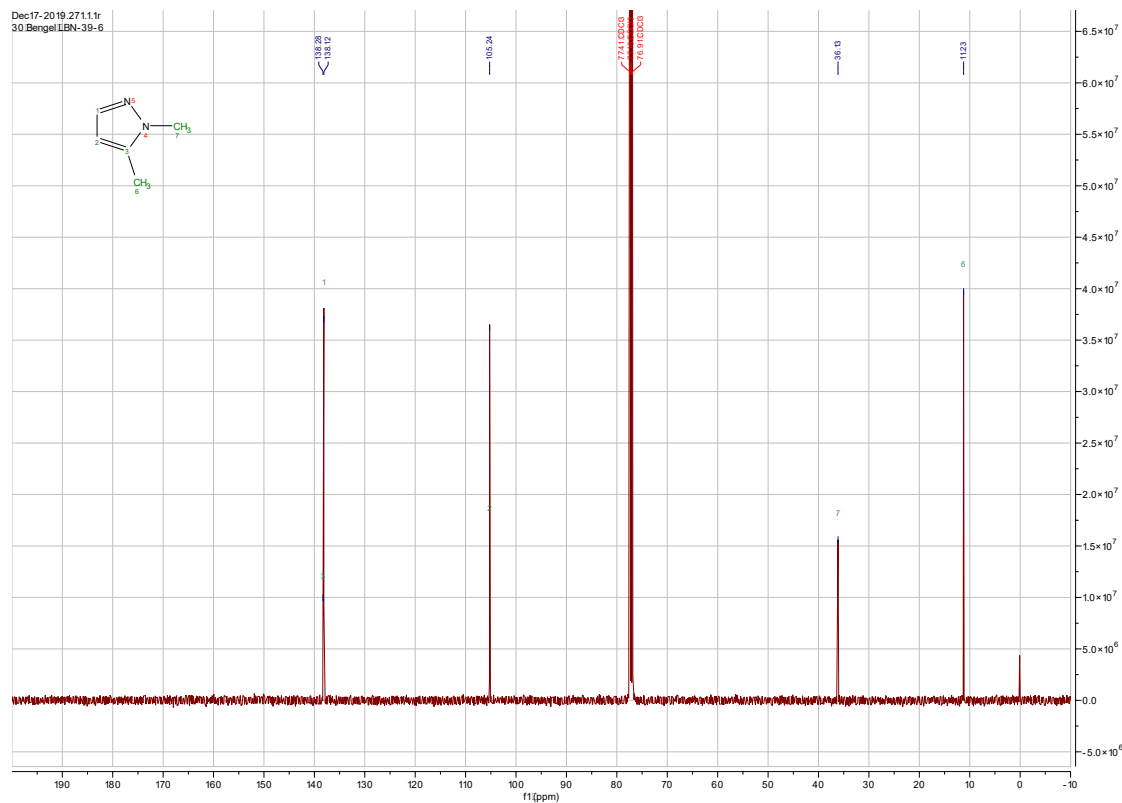

# Mixture of 1,3,4-trimethylpyrazole (2a, 25.5%) and 1,4,5-trimethylpyrazole (2b, 74.5%):

## <sup>1</sup>H-NMR

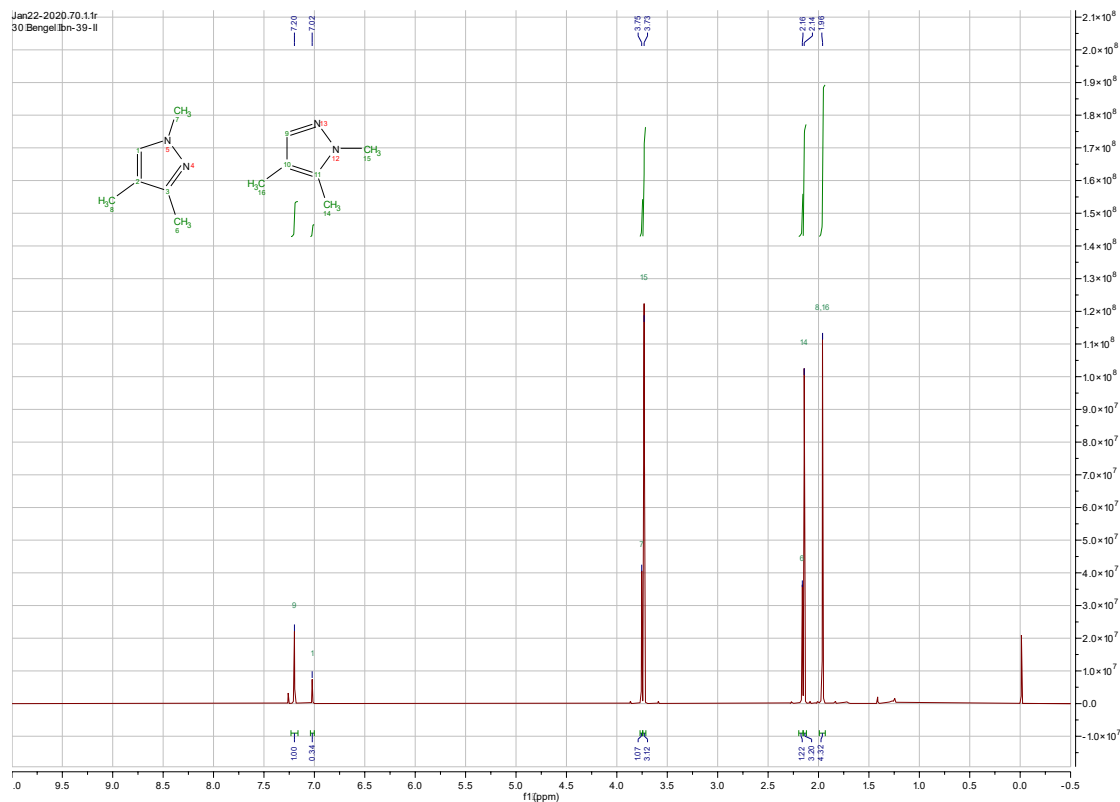

## <sup>13</sup>C-NMR

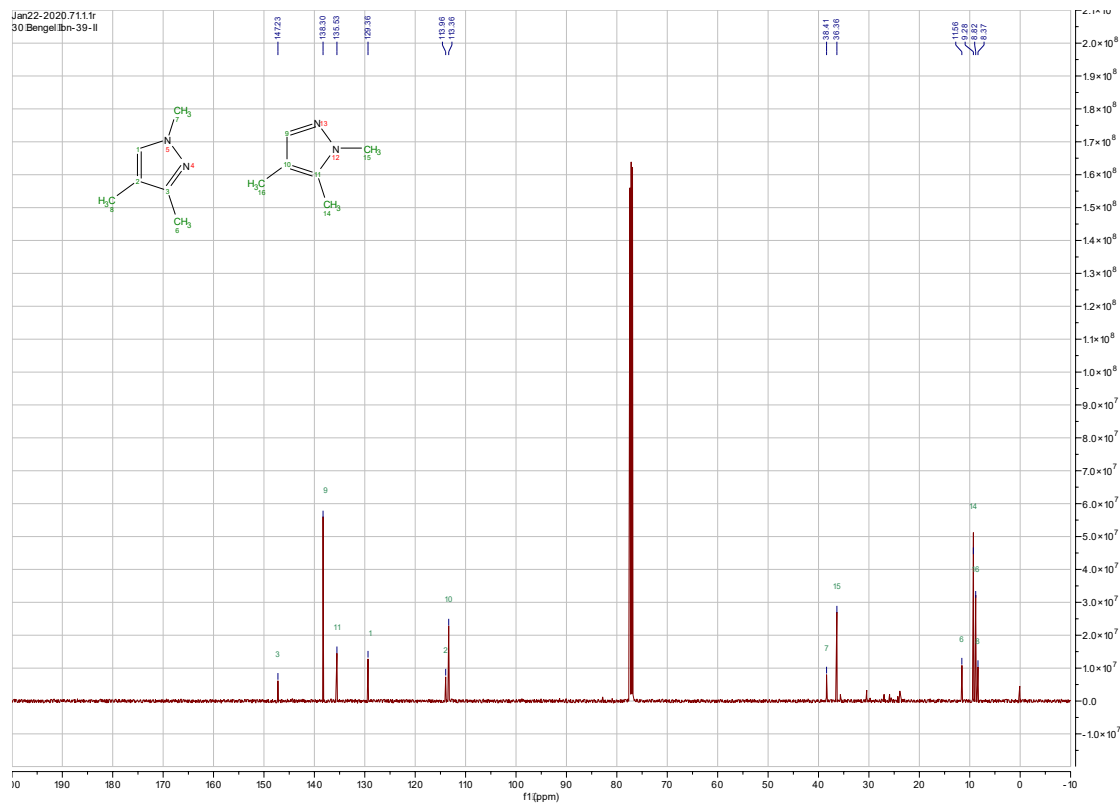

# $^1\text{H}$ , $^{13}\text{C}$ -HSQC-NMR

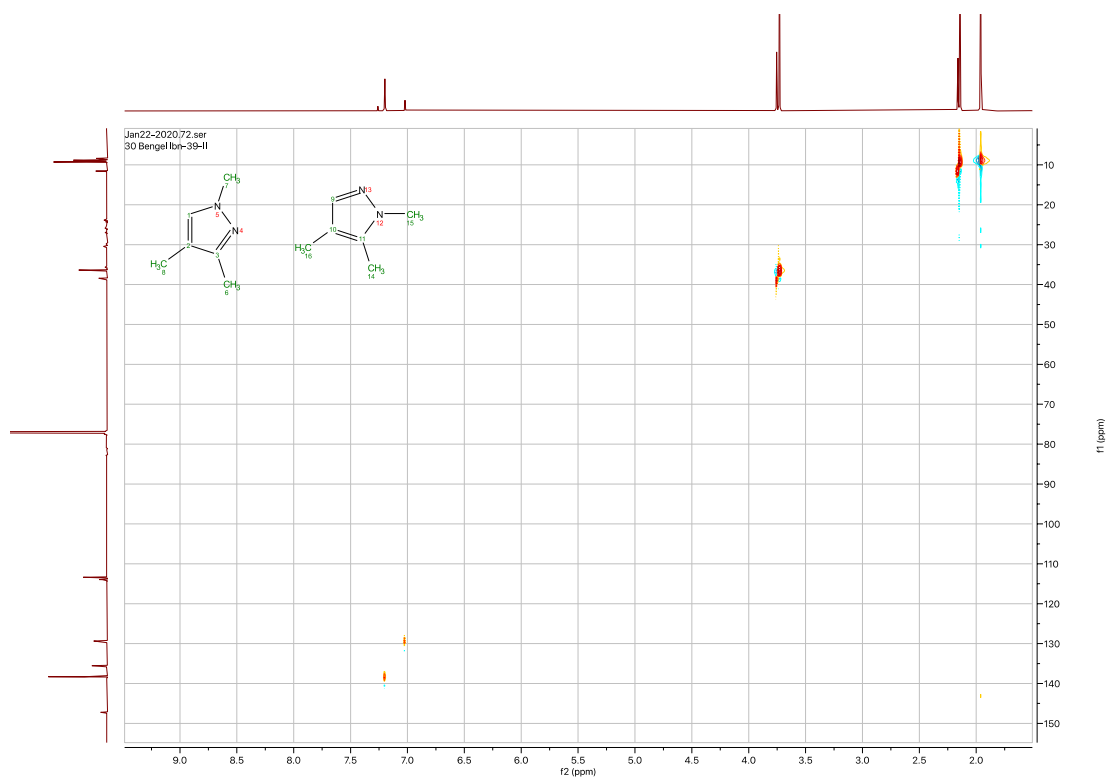

# $^1\text{H}$ , $^{13}\text{C}$ -HMBC-NMR

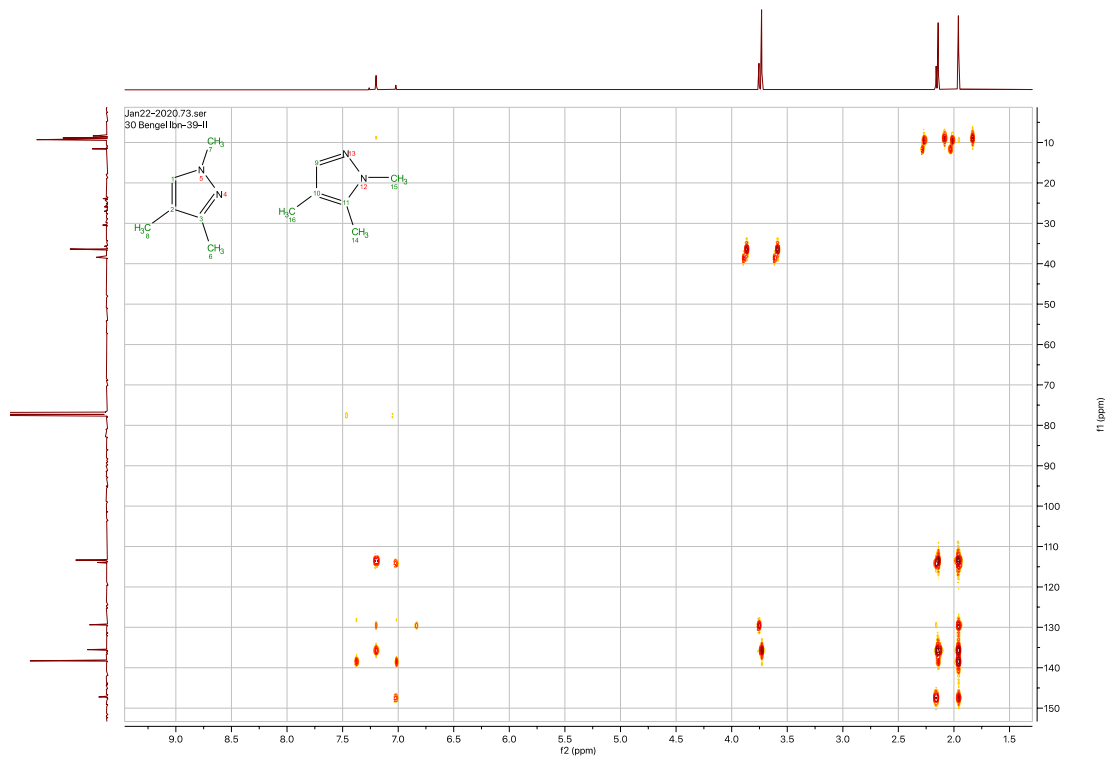

# 1-methyl-3-cyclopropylpyrazole (3a, commercial standard):

## <sup>1</sup>H-NMR

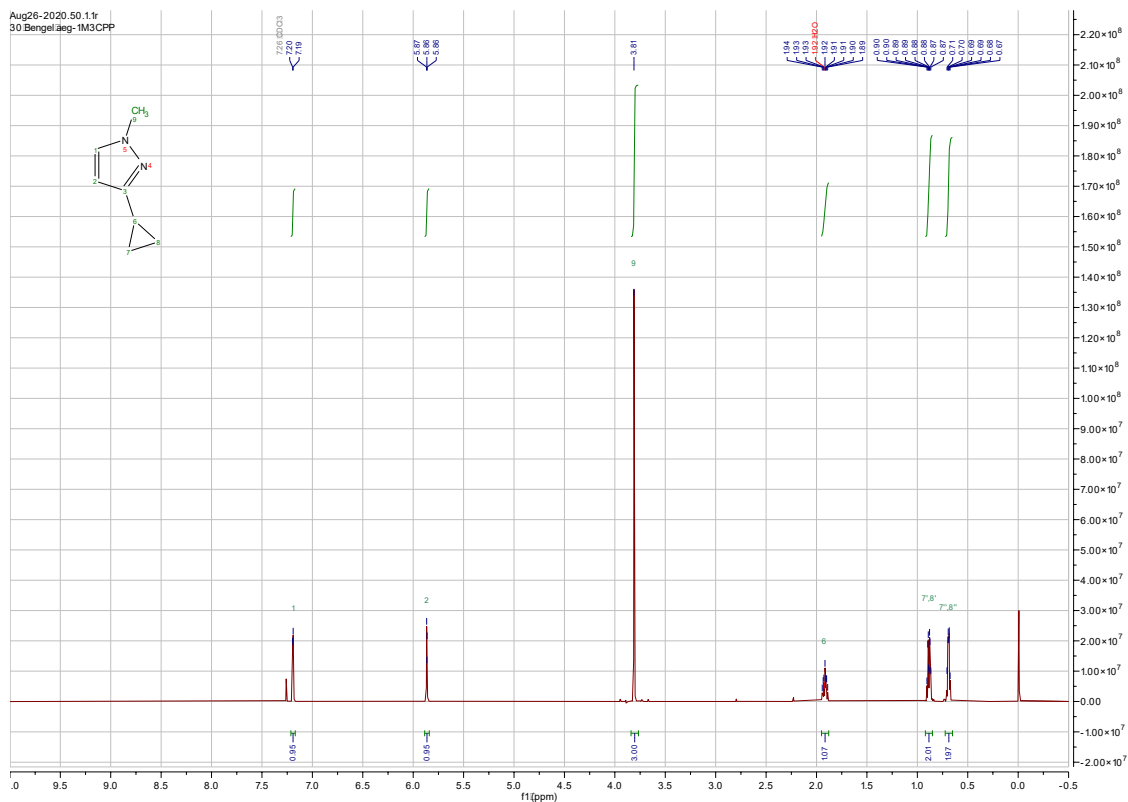

## <sup>13</sup>C-NMR

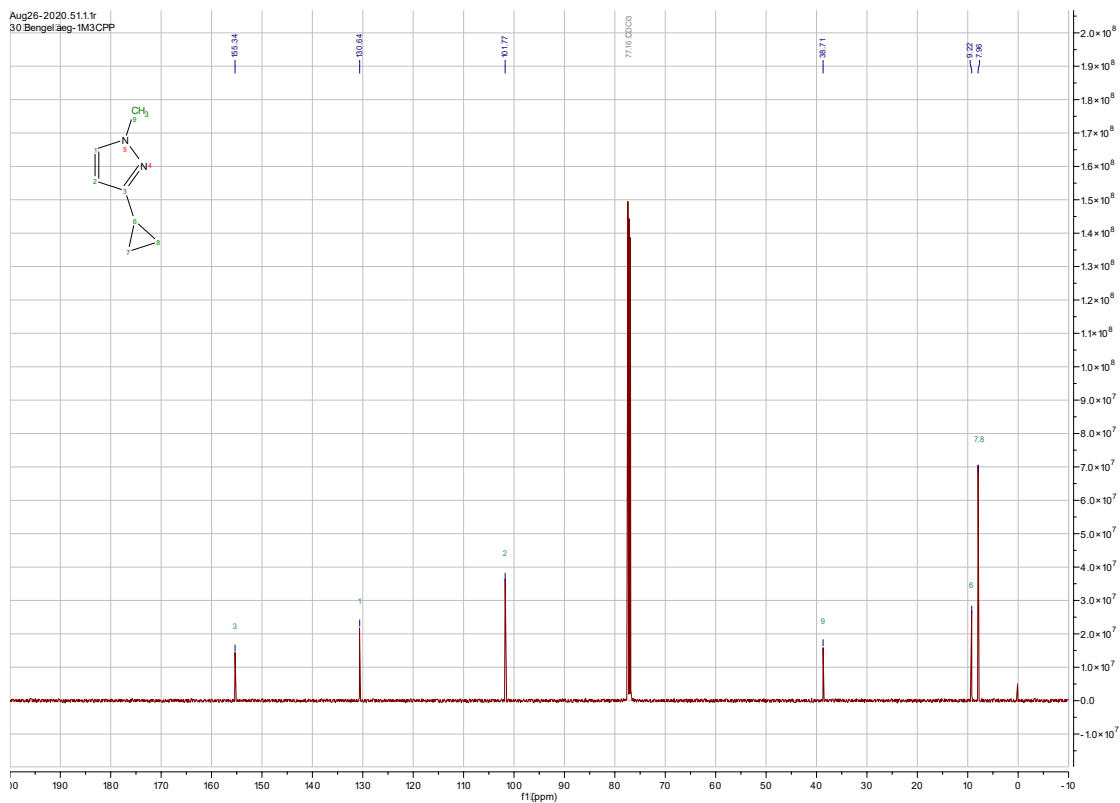



# 1-methyl-5-cyclopropylpyrazole (3b, commercial standard):

## <sup>1</sup>H-NMR

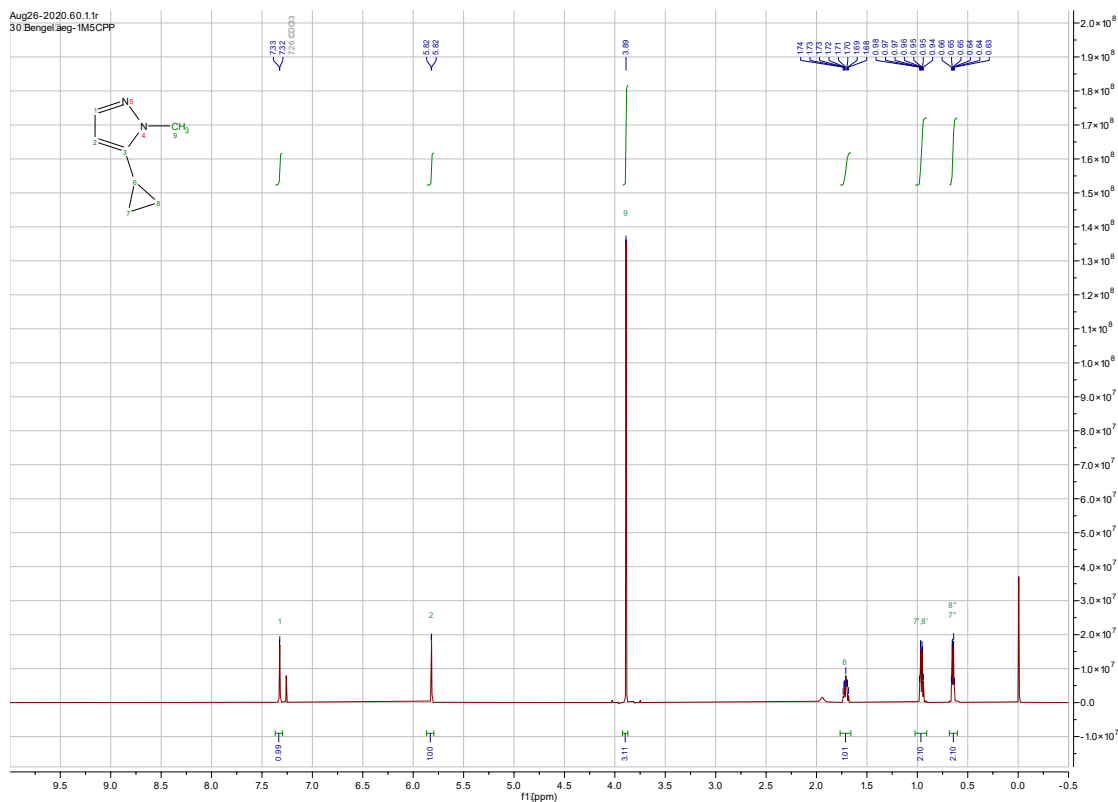

## <sup>13</sup>C-NMR

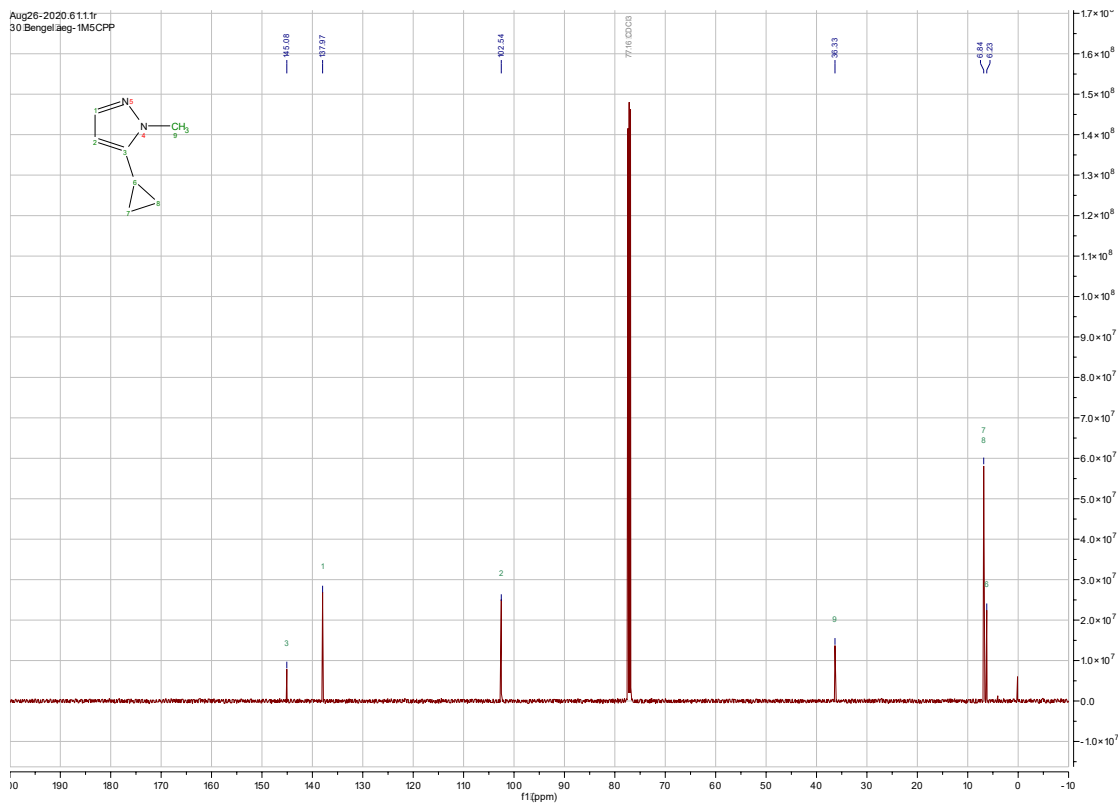

# 1-ethyl-3-cyclopropylpyrazole (7a):

## <sup>1</sup>H-NMR

Jun24-2020.30.11r  
30 Bengelag-15-1

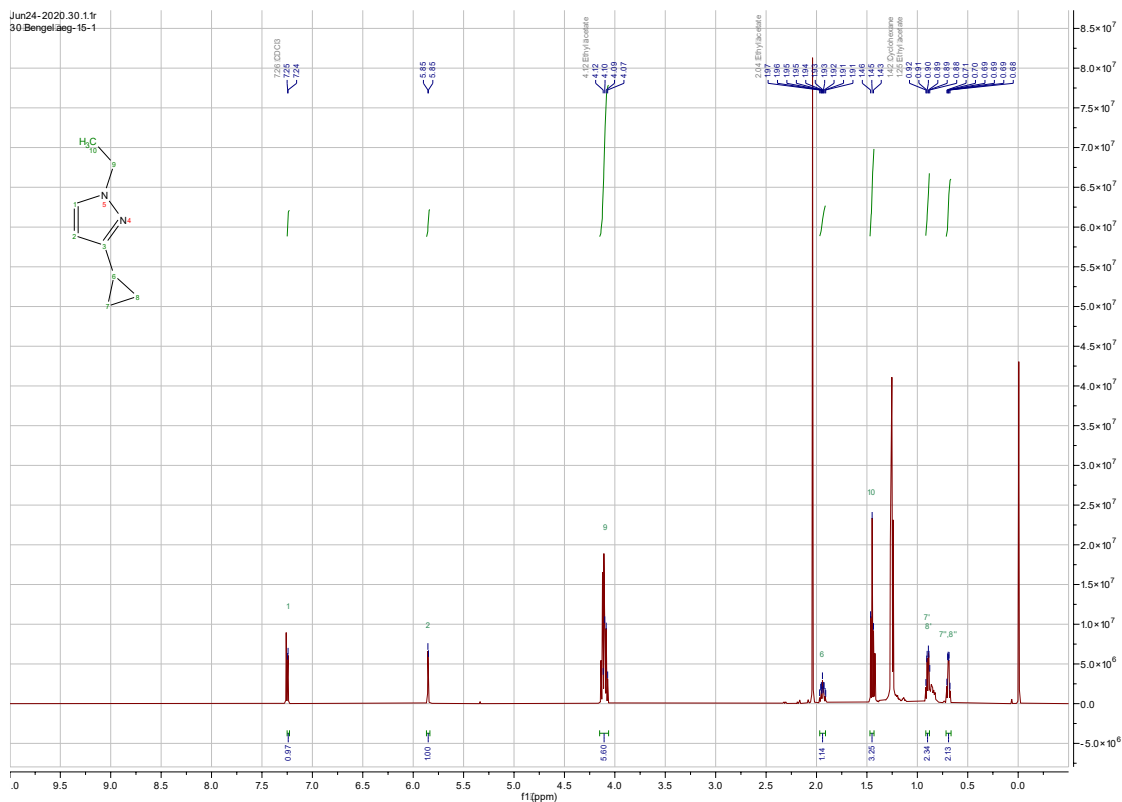

## <sup>13</sup>C-NMR

Jun24-2020.3111r  
30 Bengelag-15-1

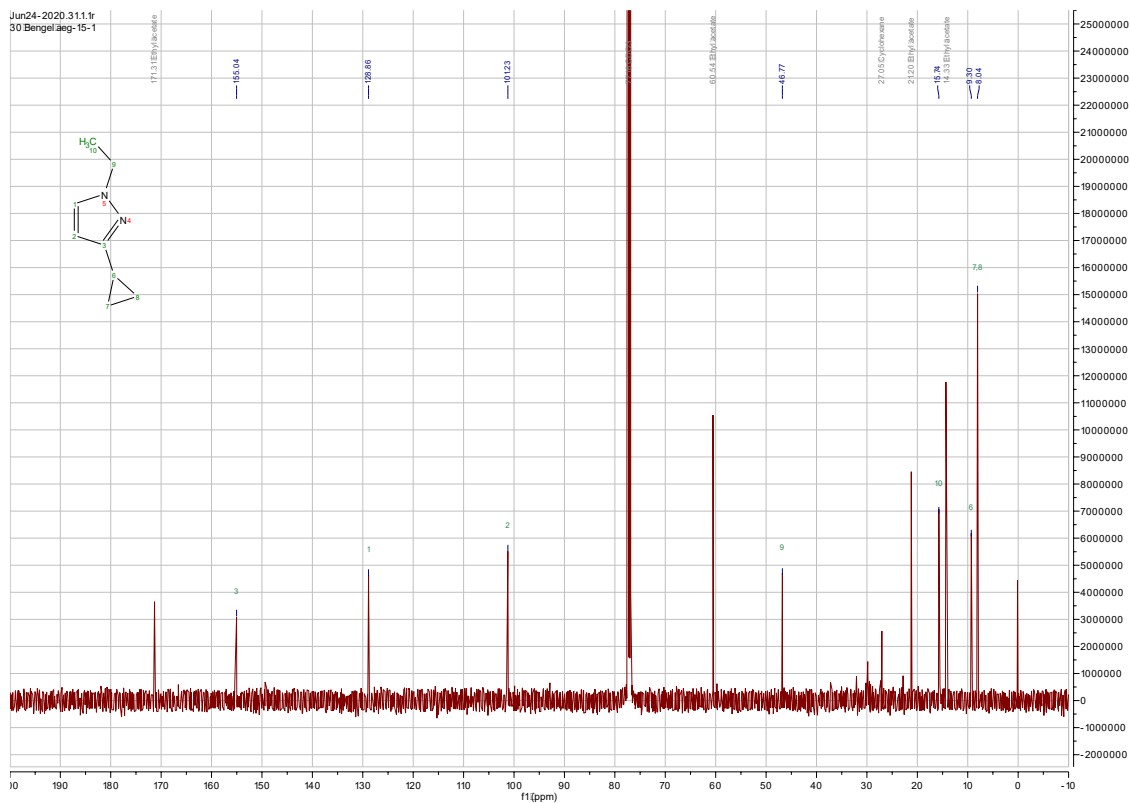

# 1-ethyl-5-cyclopropylpyrazole (7b):

## <sup>1</sup>H-NMR

Jun24-2020.40.11r  
30 Bengelag-15-2

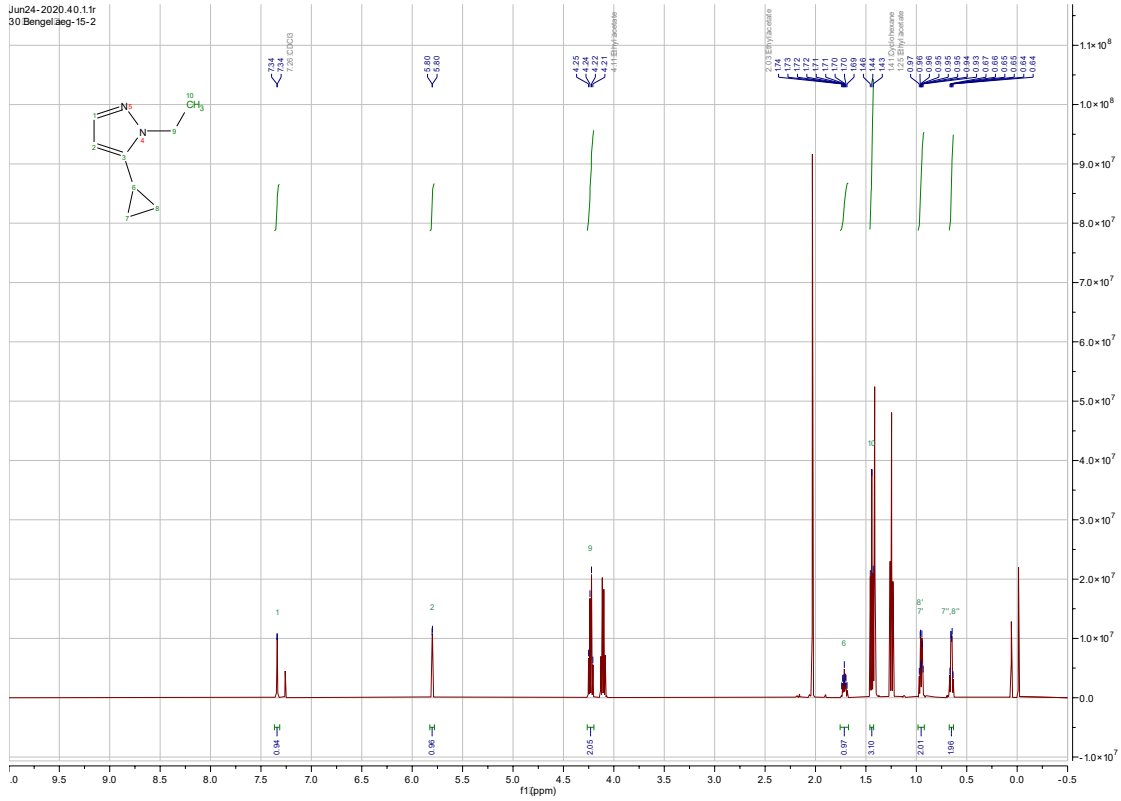

## <sup>13</sup>C-NMR

Jun24-2020.41.11r  
30 Bengelag-15-2

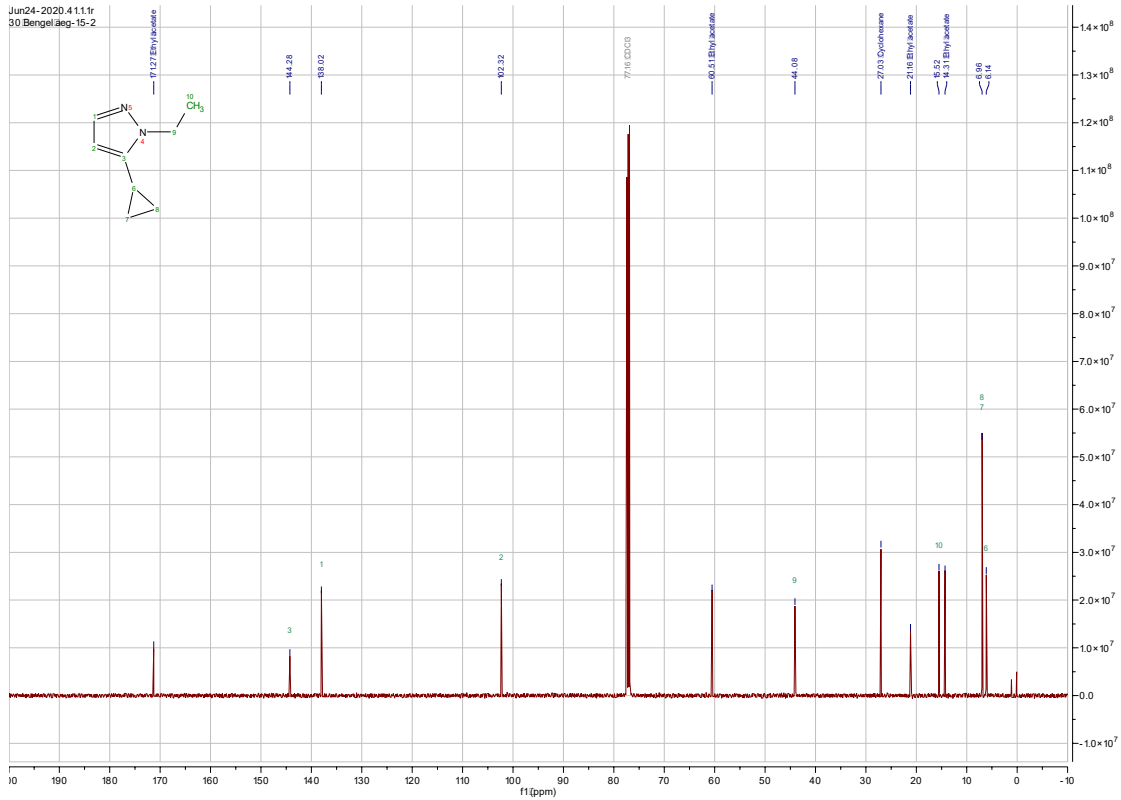

# 1-propyl-3-cyclopropylpyrazole (8a):

## <sup>1</sup>H-NMR

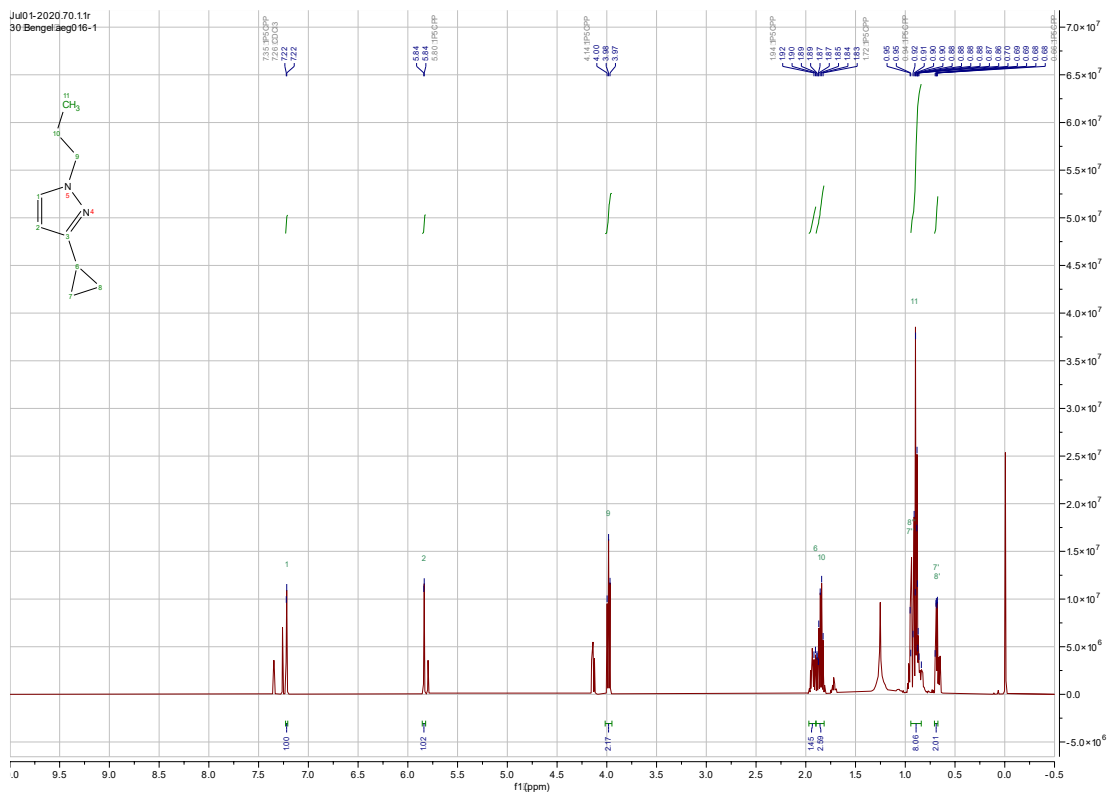

## <sup>13</sup>C-NMR

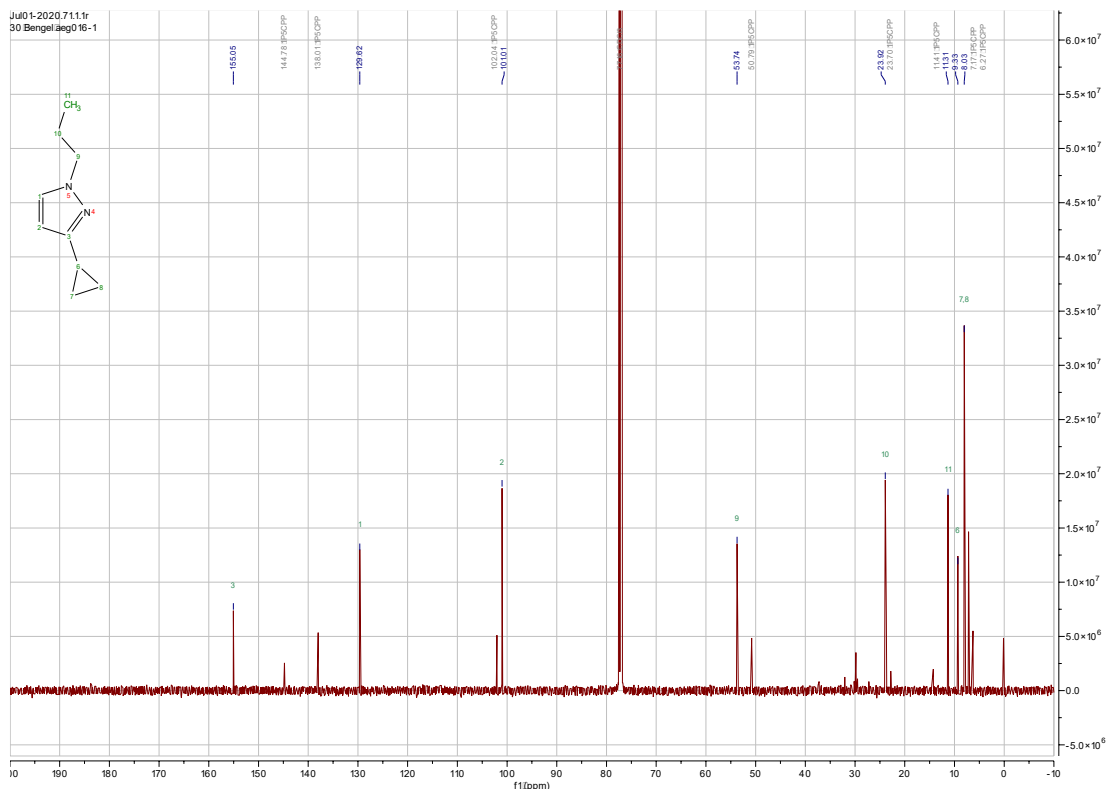

# 1-propyl-5-cyclopropylpyrazole (8b):

## <sup>1</sup>H-NMR

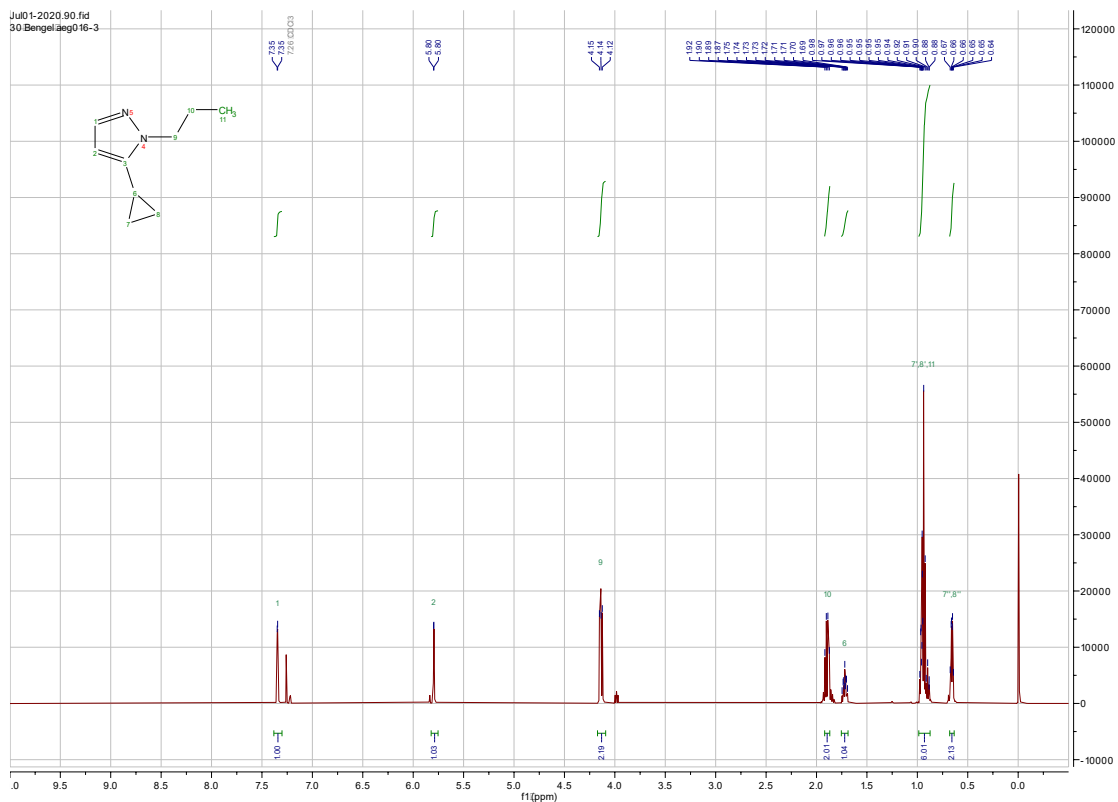

## <sup>13</sup>C-NMR

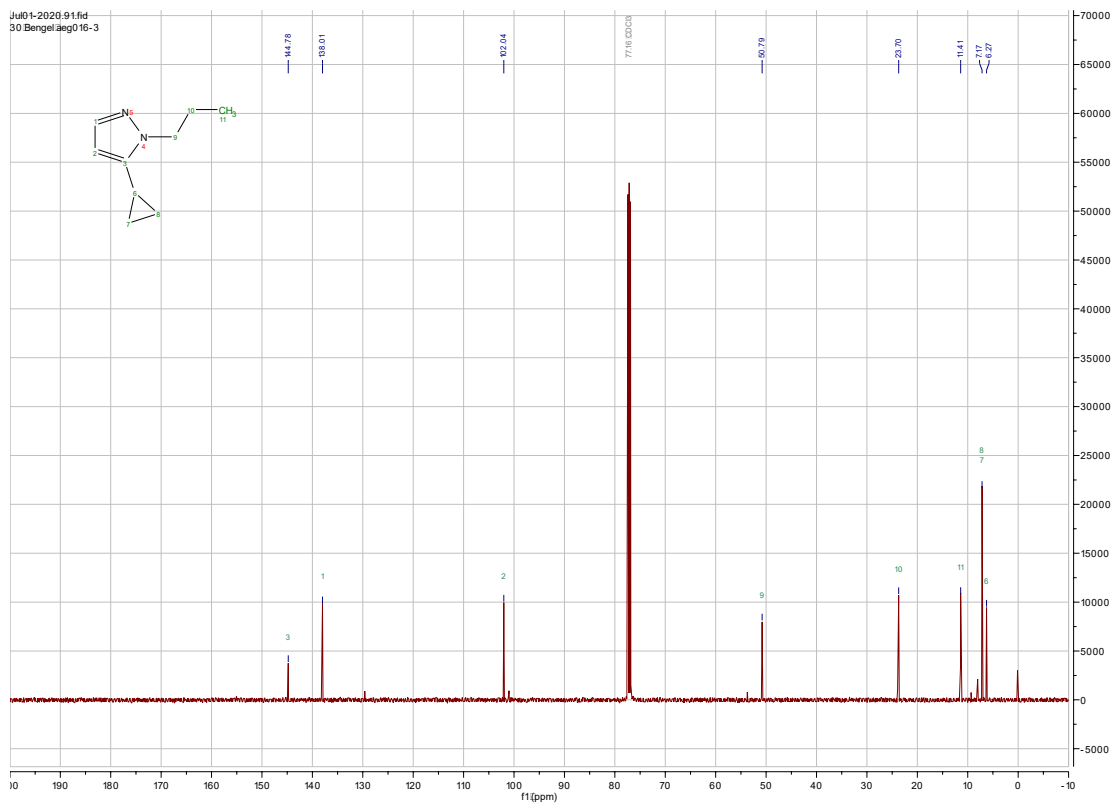

# 1-methyl-3(2-furyl)pyrazole (4a):

## <sup>1</sup>H-NMR

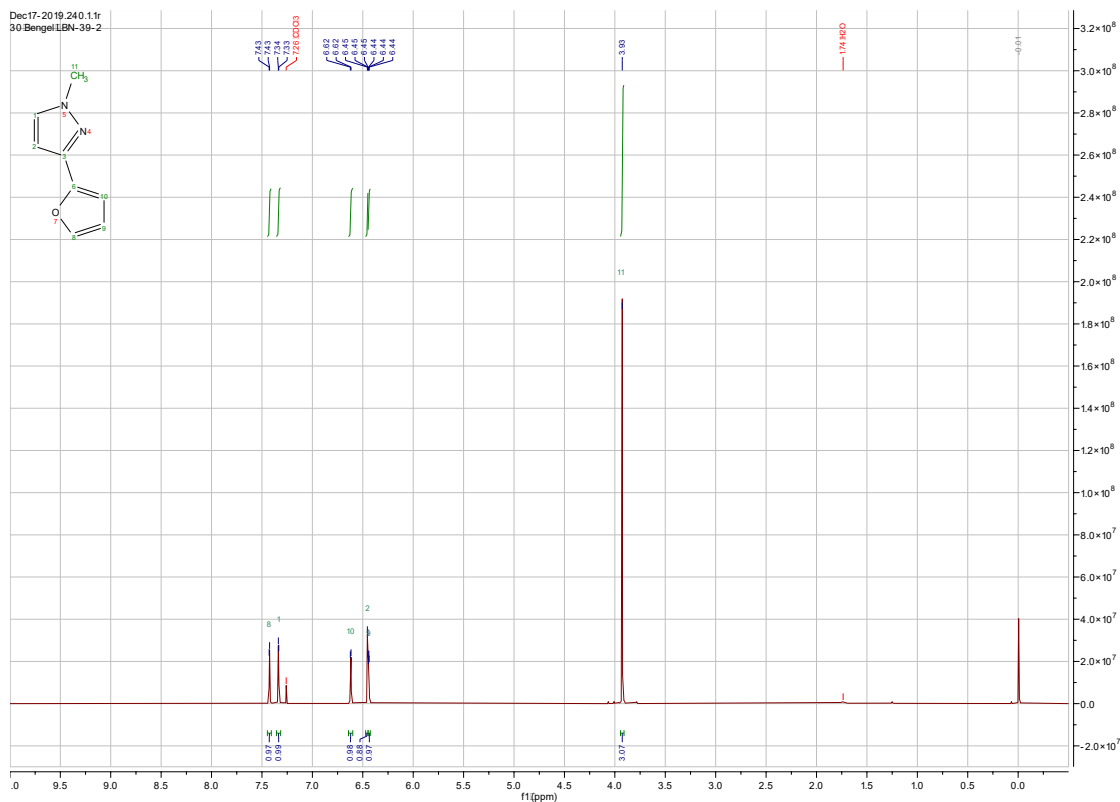

## <sup>13</sup>C-NMR

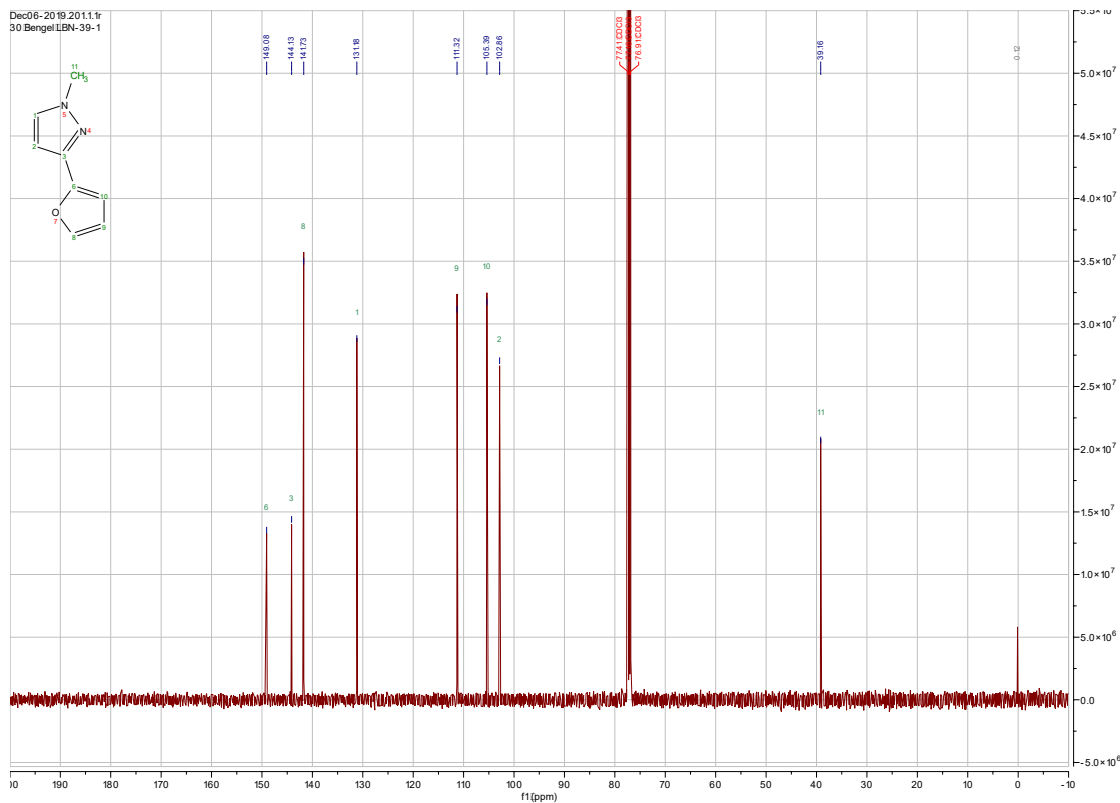

# $^1\text{H}, ^{13}\text{C}$ -HSQC-NMR

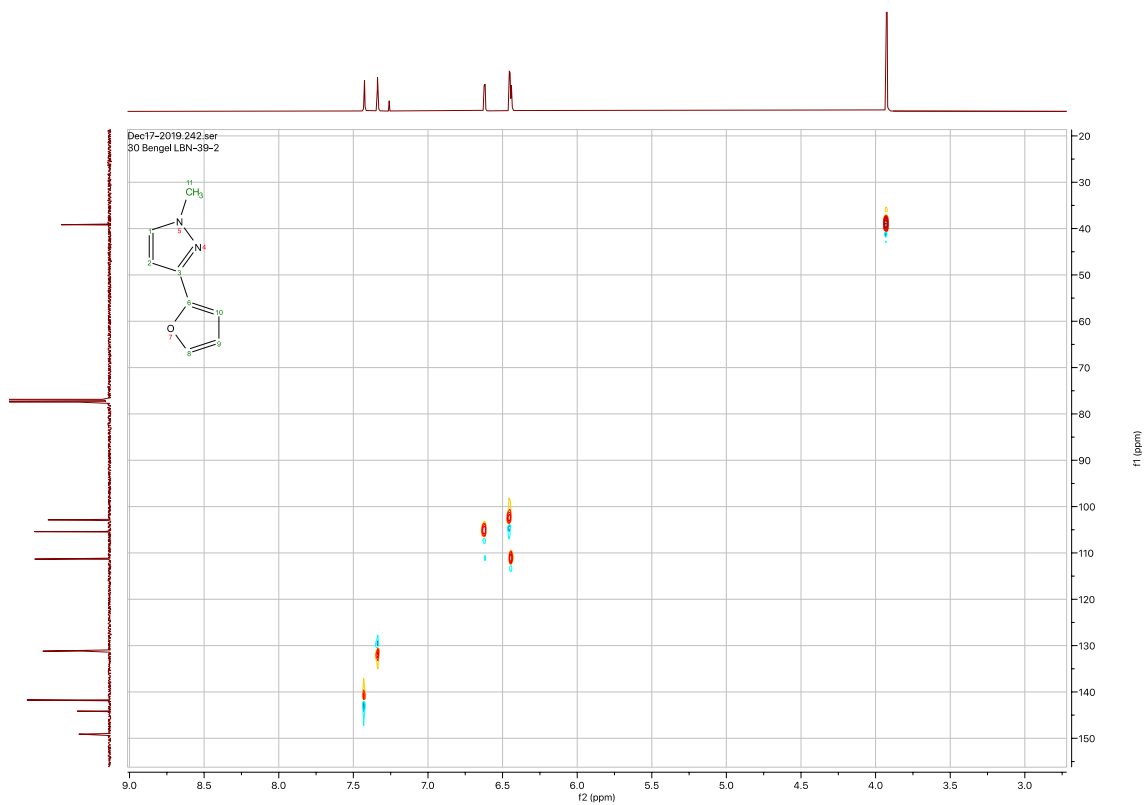

# $^1\text{H}, ^{13}\text{C}$ -HMBC-NMR

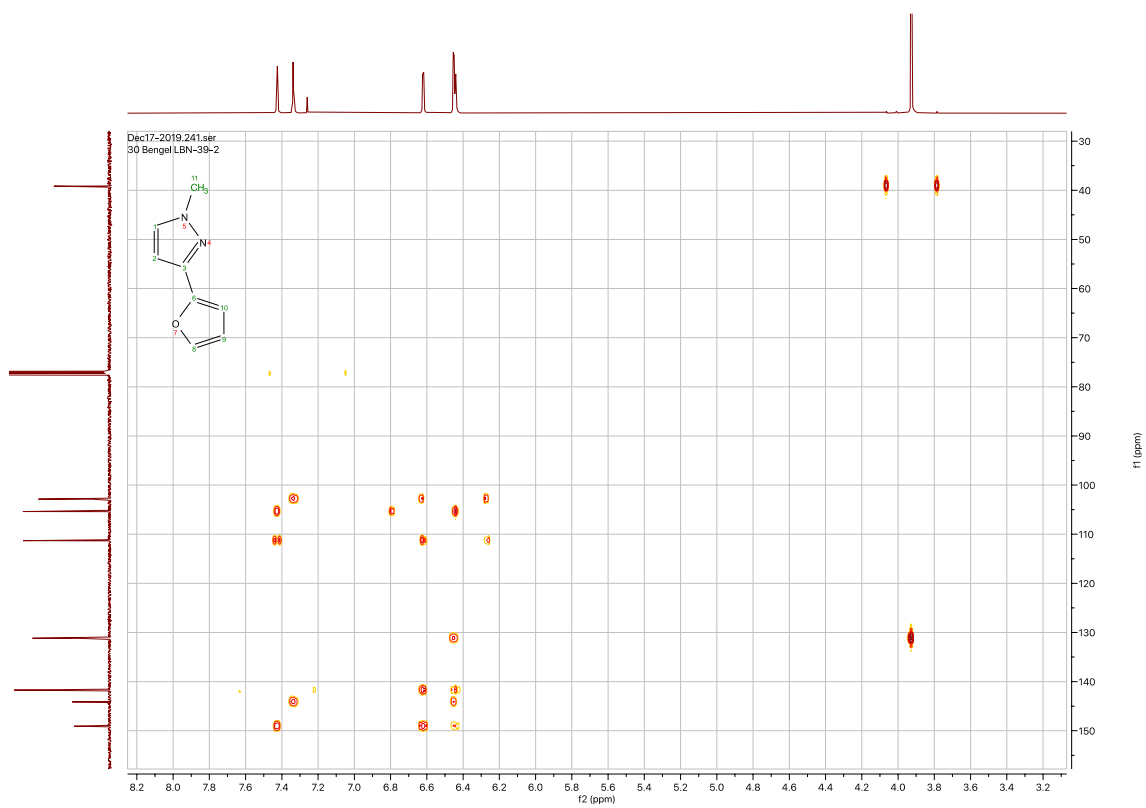

# 1-methyl-5(2-furyl)pyrazole (4b):

## <sup>1</sup>H-NMR

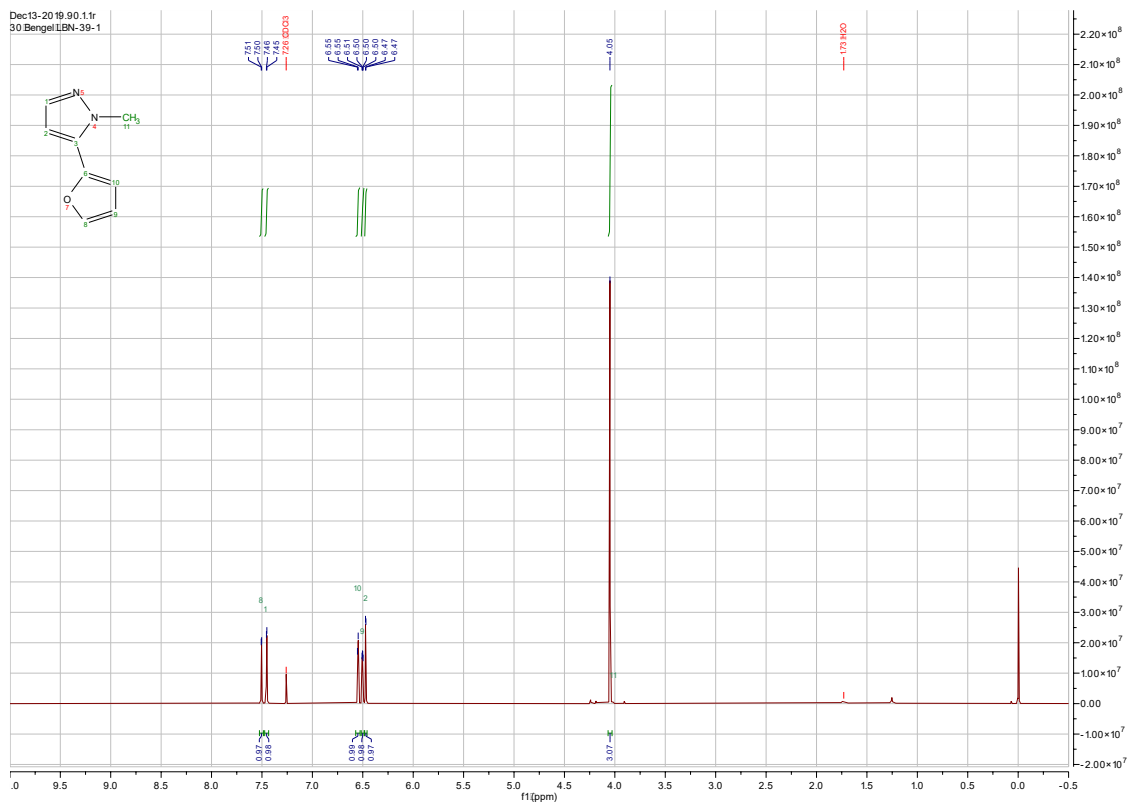

## <sup>13</sup>C-NMR

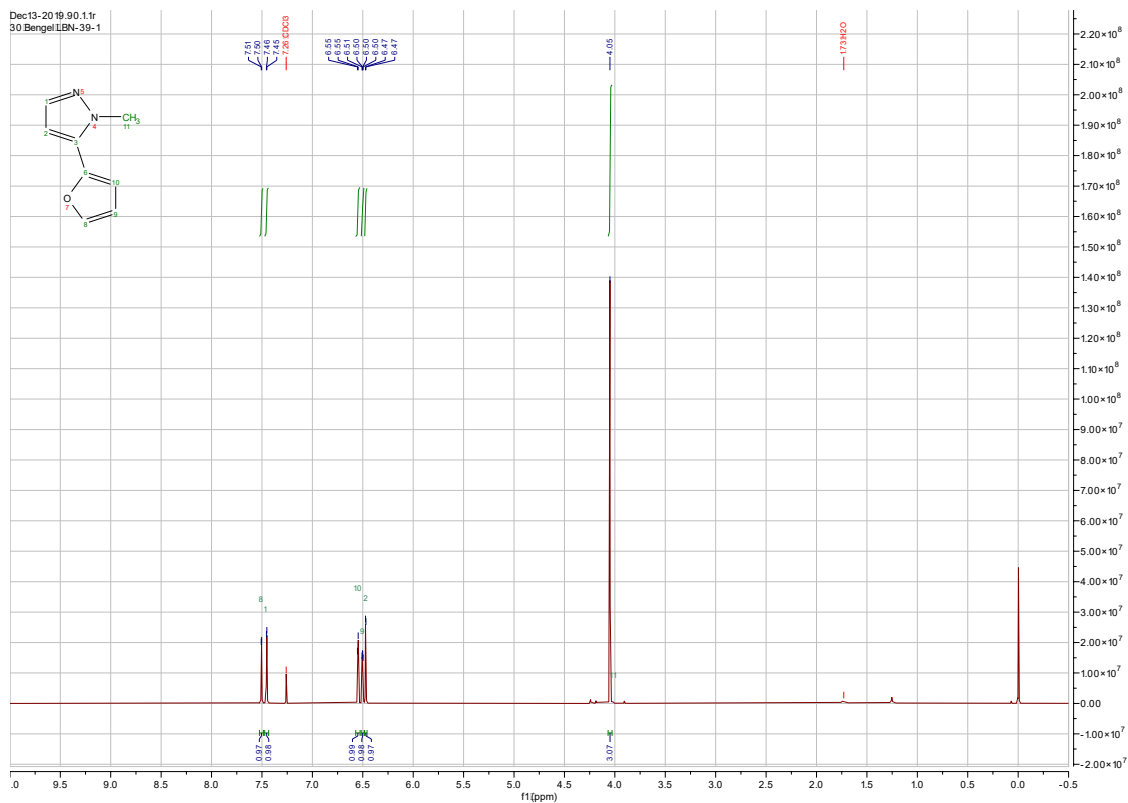



# $^1\text{H}, ^{13}\text{C}$ -HSQC-NMR

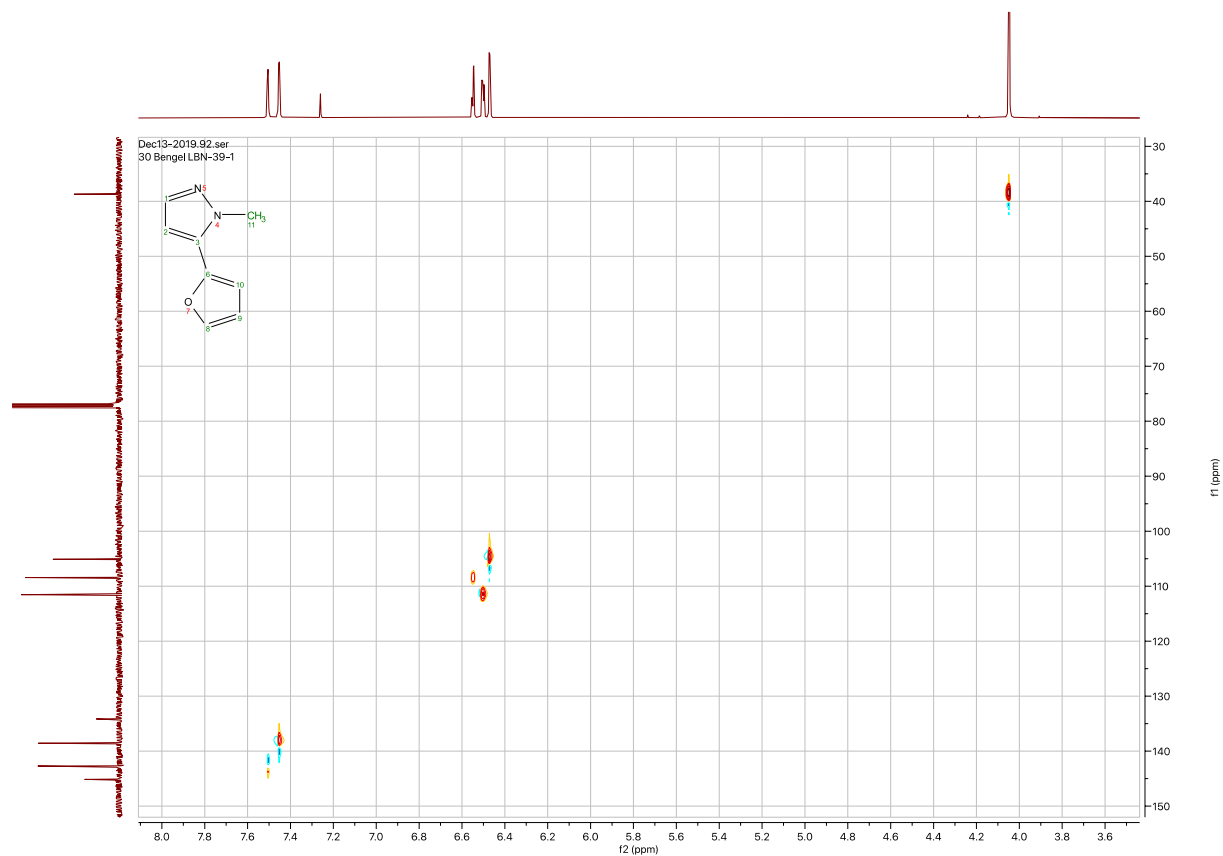

# $^1\text{H}, ^{13}\text{C}$ -HMBC-NMR

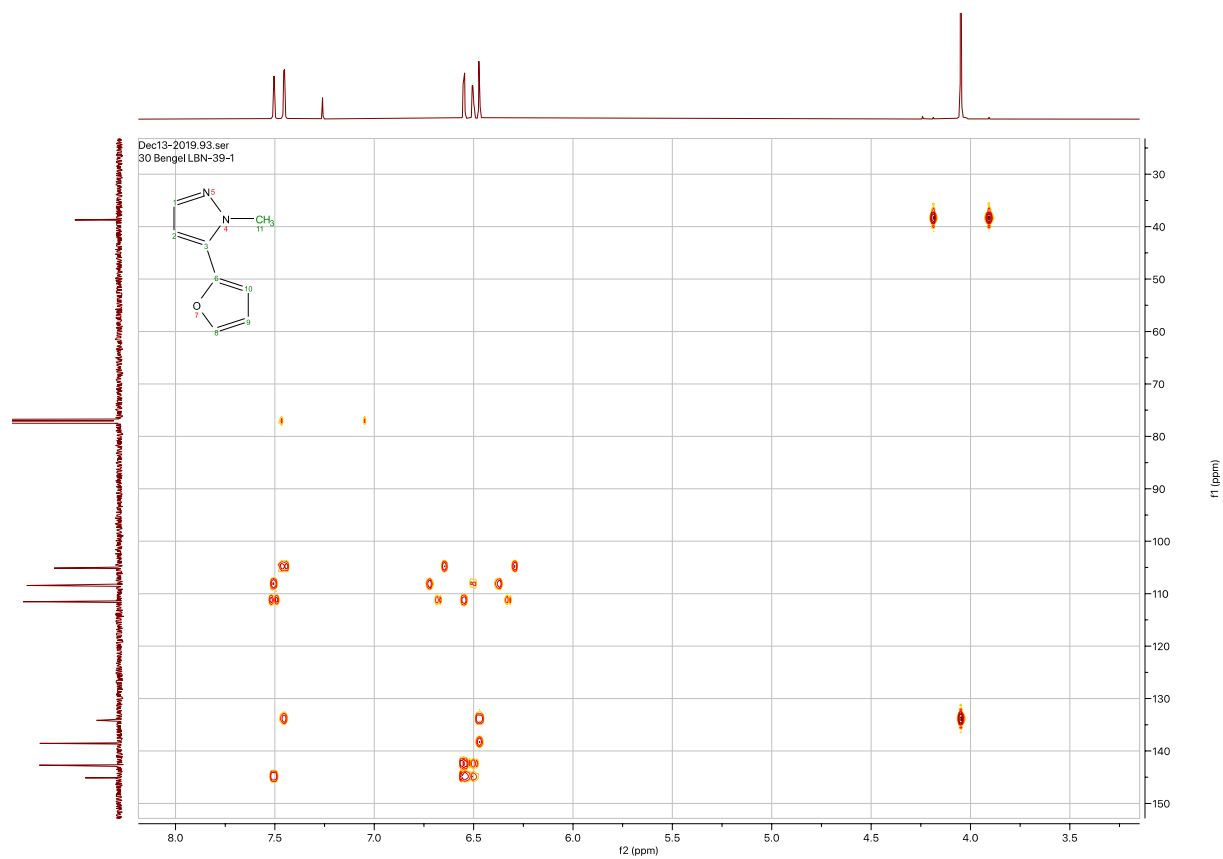

# 1-methyl-3(2-fluorophenyl)pyrazole (5a):

## <sup>1</sup>H-NMR

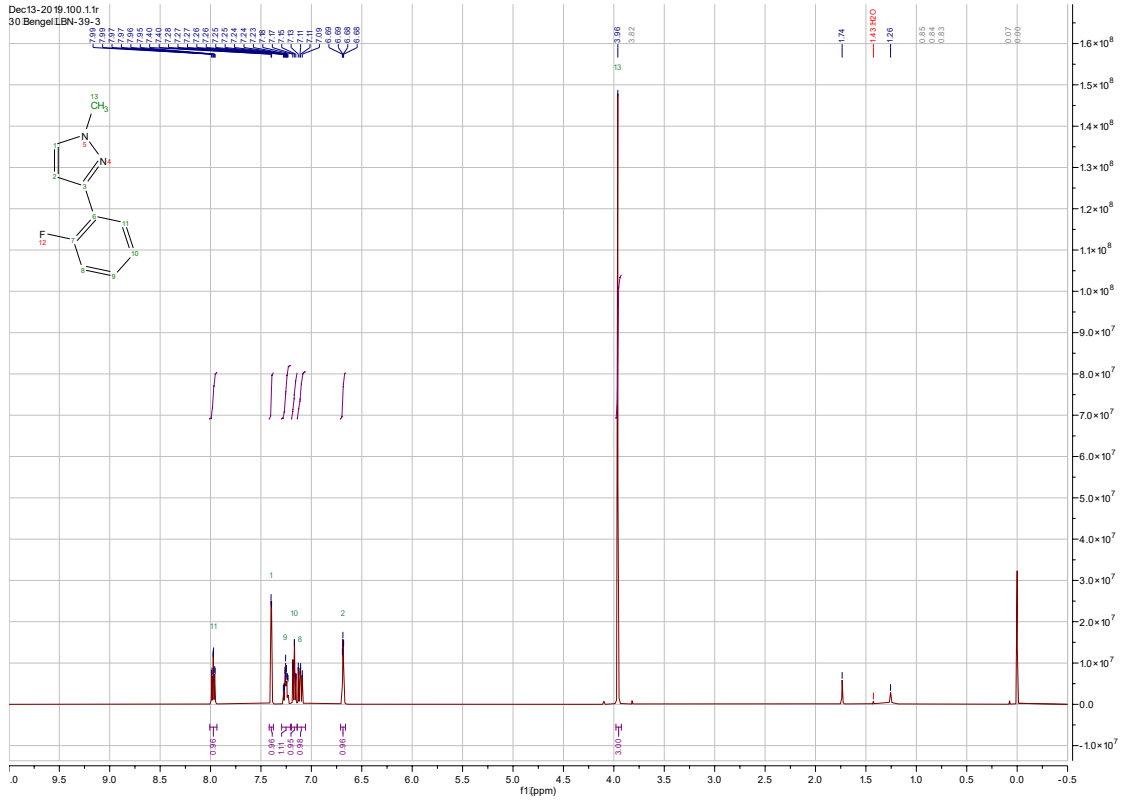

## <sup>13</sup>C-NMR

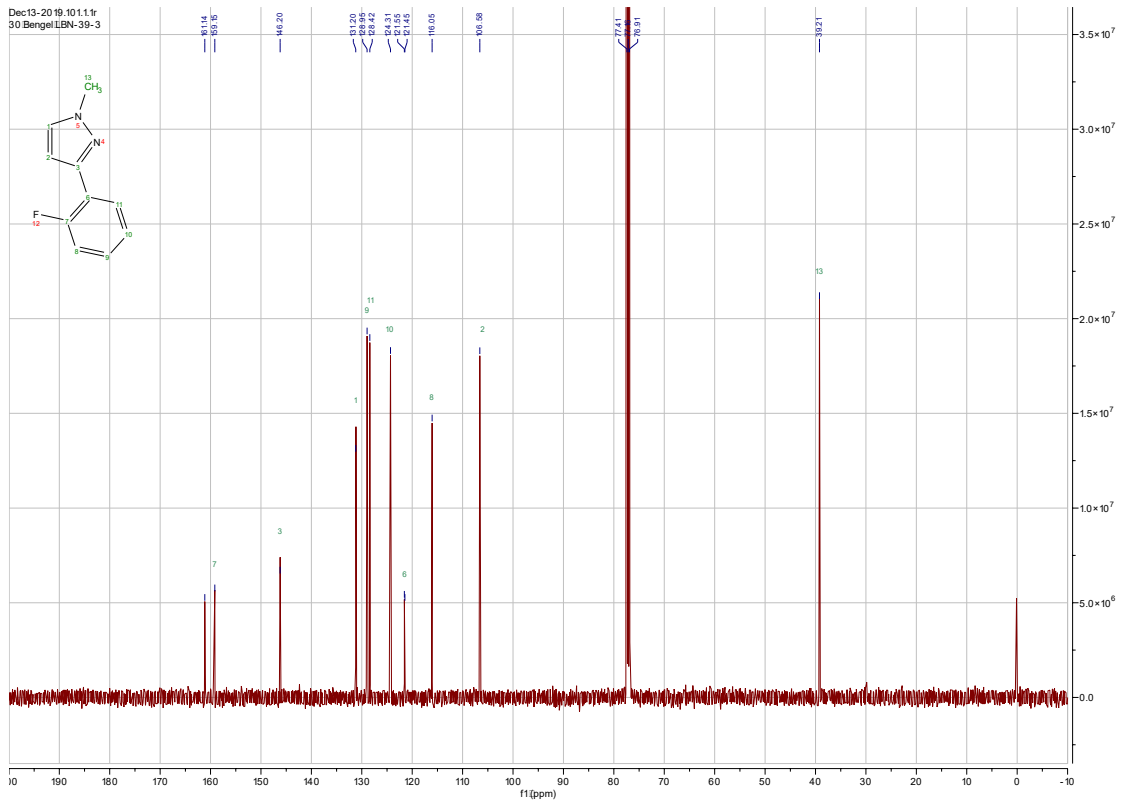

# $^1\text{H}, ^{13}\text{C}$ -HSQC-NMR

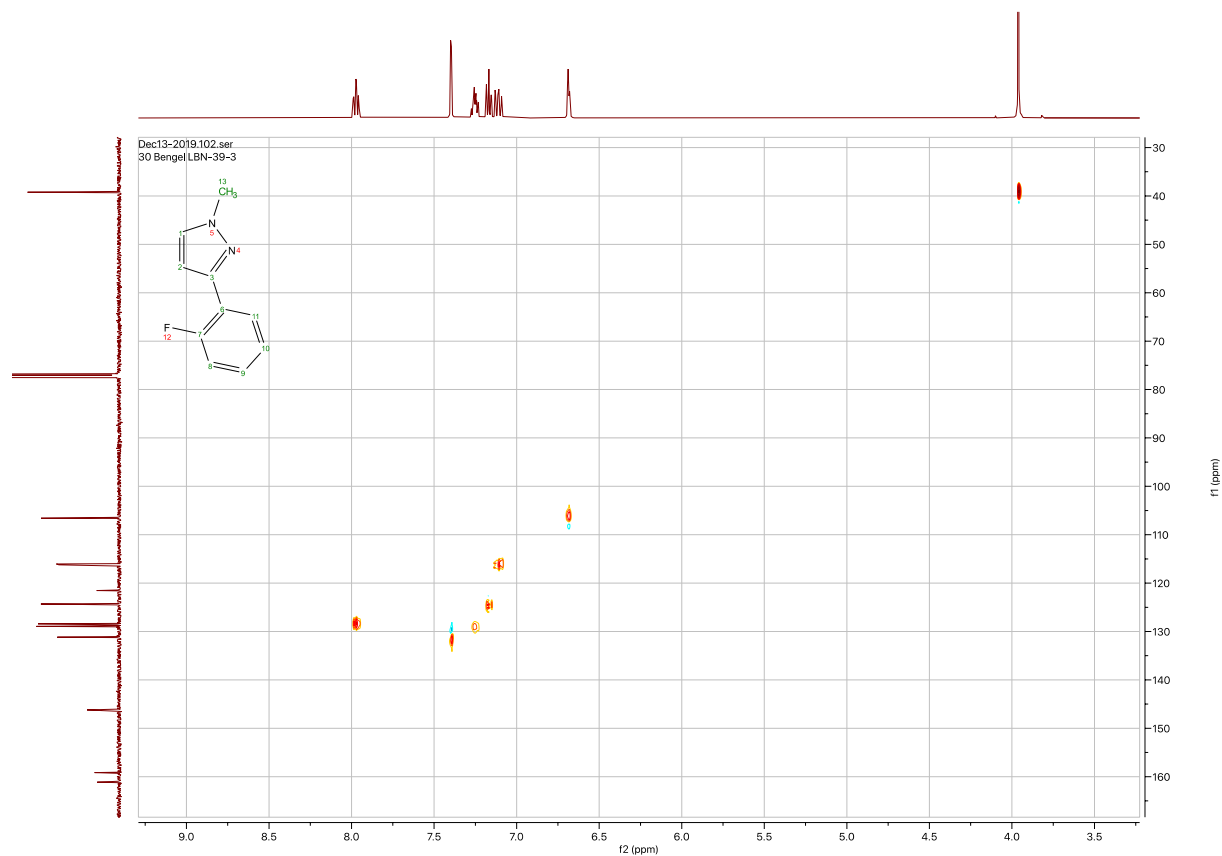

# $^1\text{H}, ^{13}\text{C}$ -HMBC-NMR

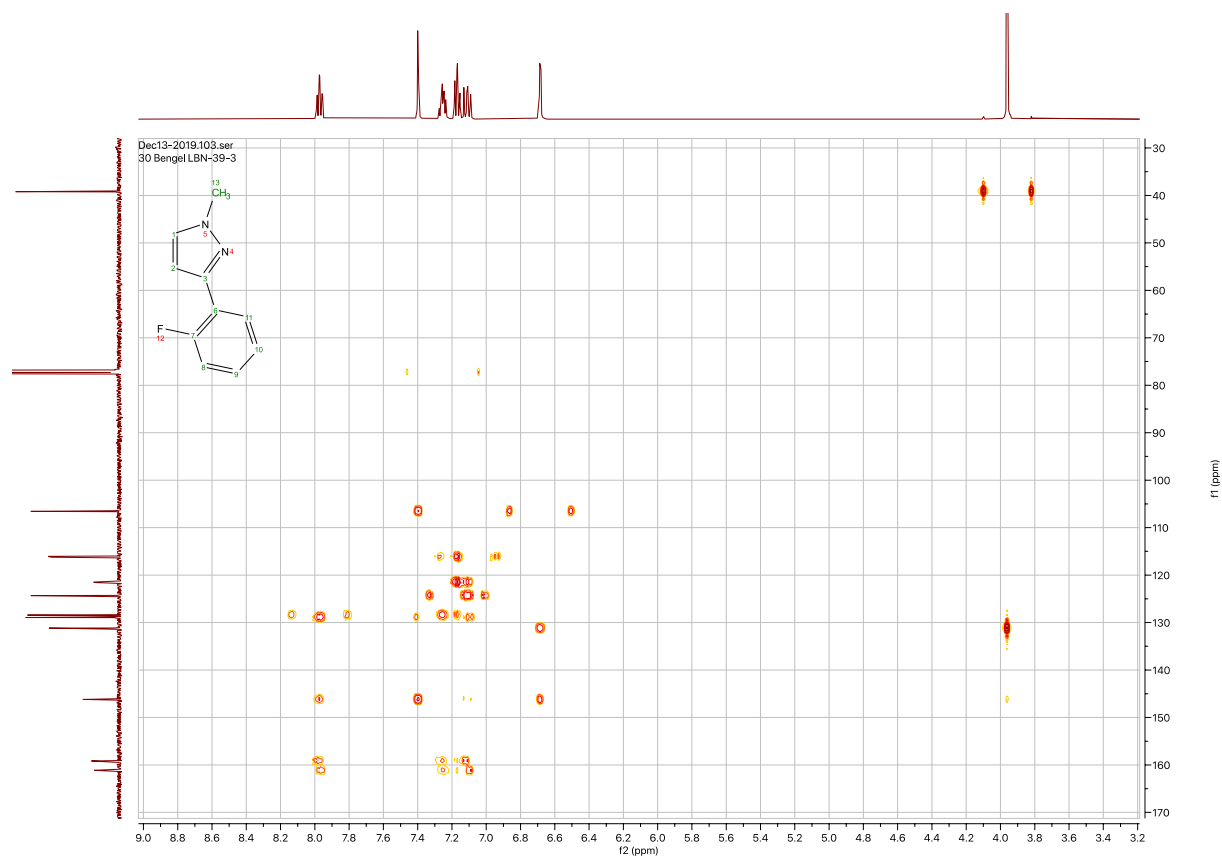

# $^1\text{H}$ , $^1\text{H}$ -COSY-NMR

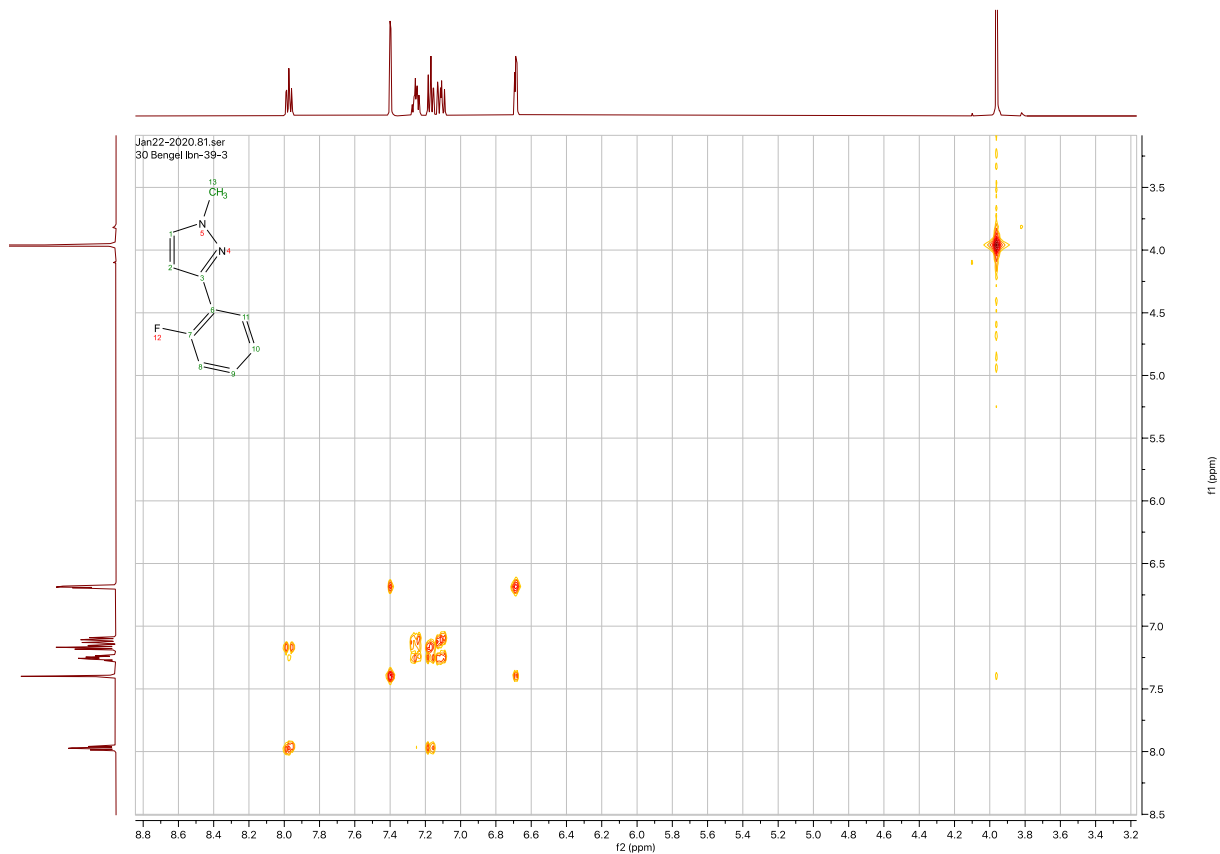

**Mixture of 1-methyl-3(2-fluorophenyl)pyrazole (5a, 76%) and 1-methyl-5(2-fluorophenyl)pyrazole (5b, 24%):**

**<sup>1</sup>H-NMR**

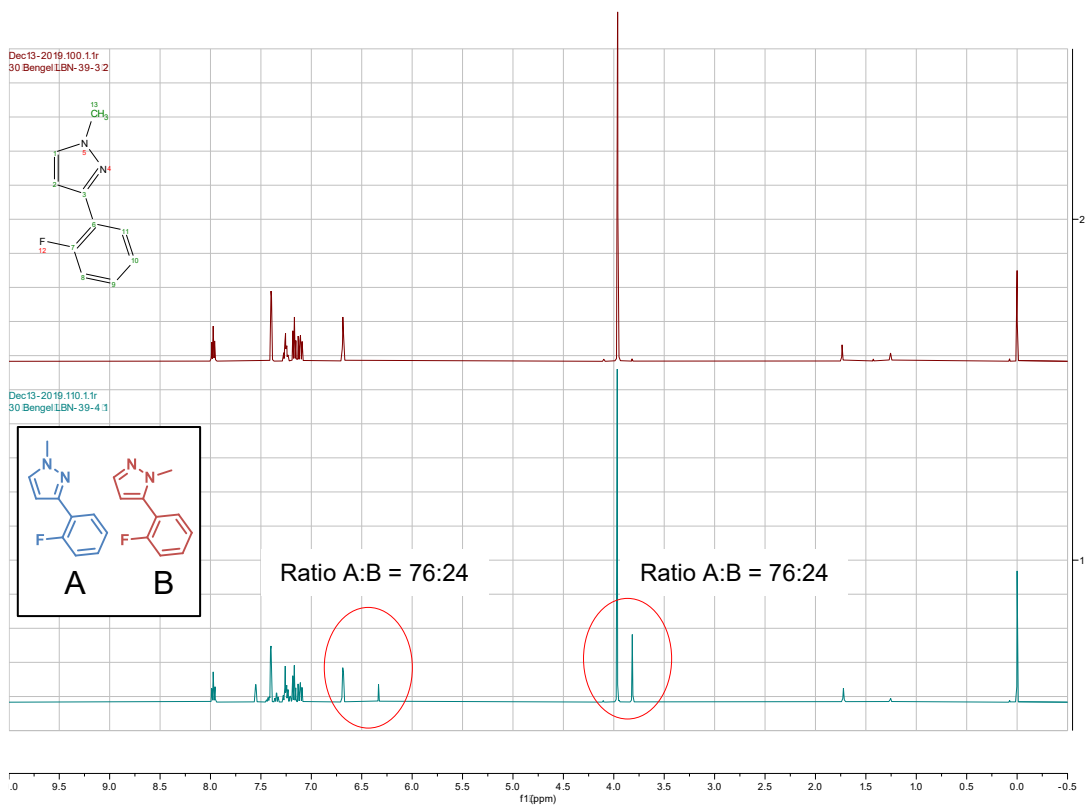

# 1,5-dimethyl-4-phenylpyrazole (6b):

## <sup>1</sup>H-NMR

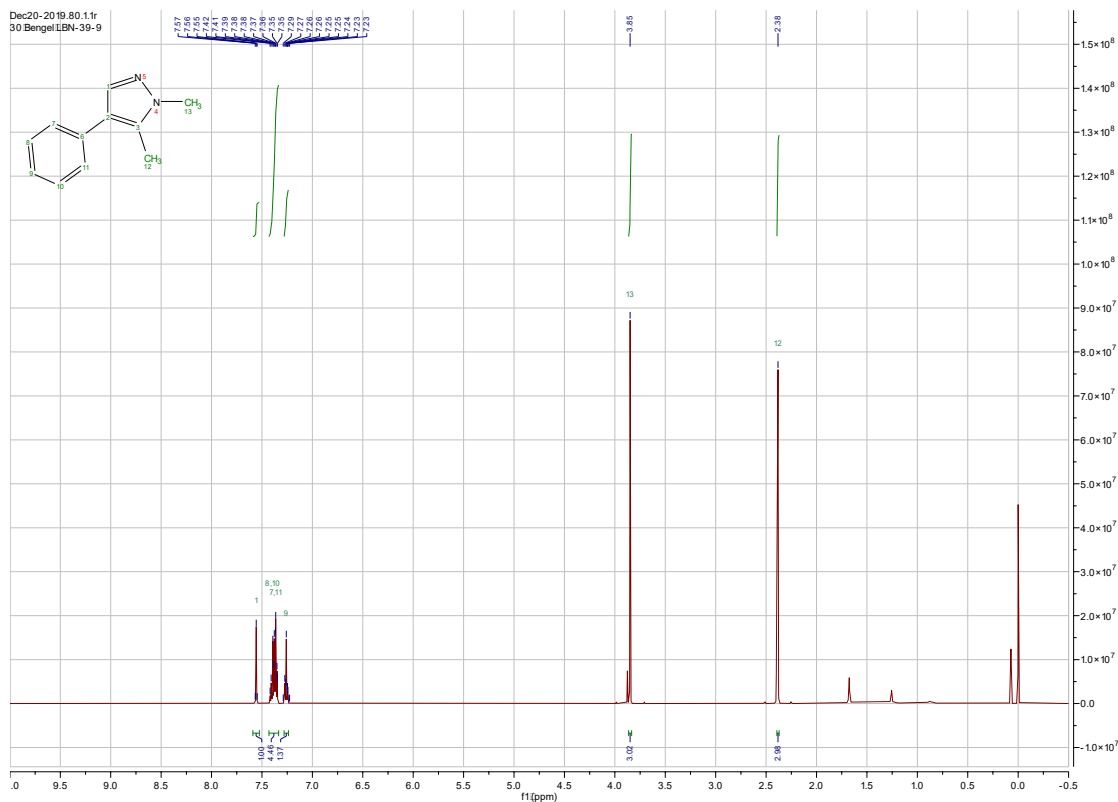

## <sup>13</sup>C-NMR

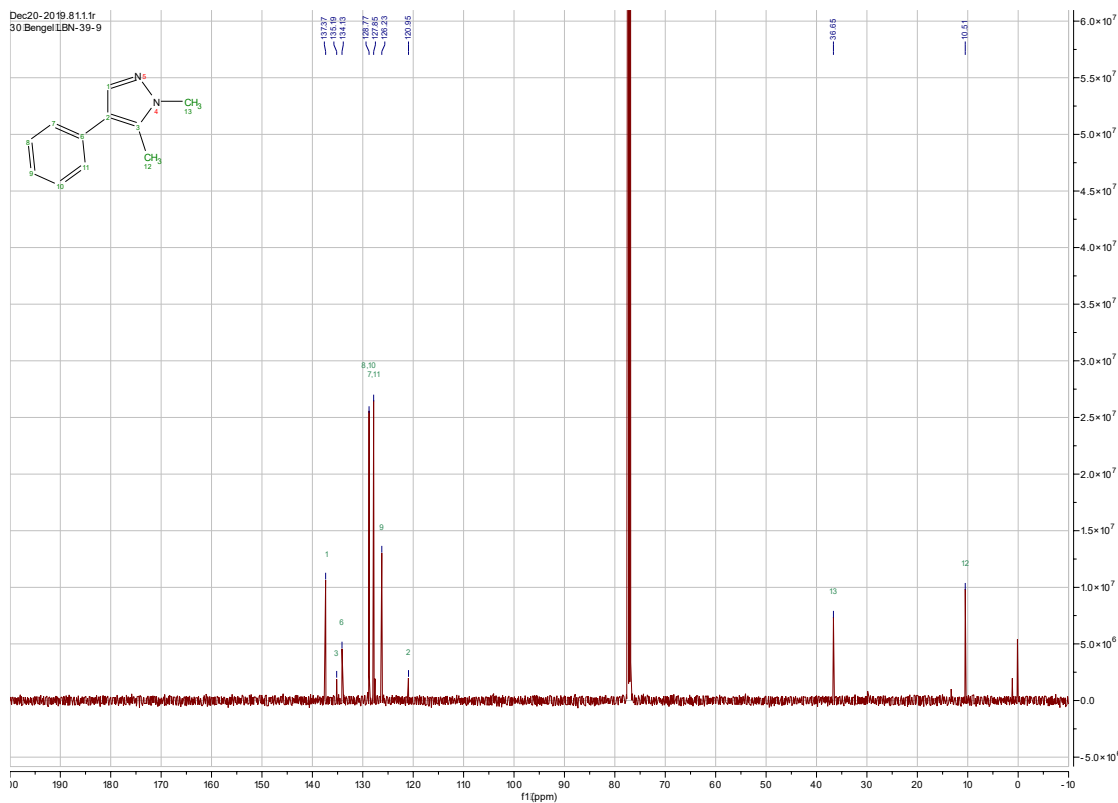

# $^1\text{H}, ^{13}\text{C}$ -HSQC-NMR

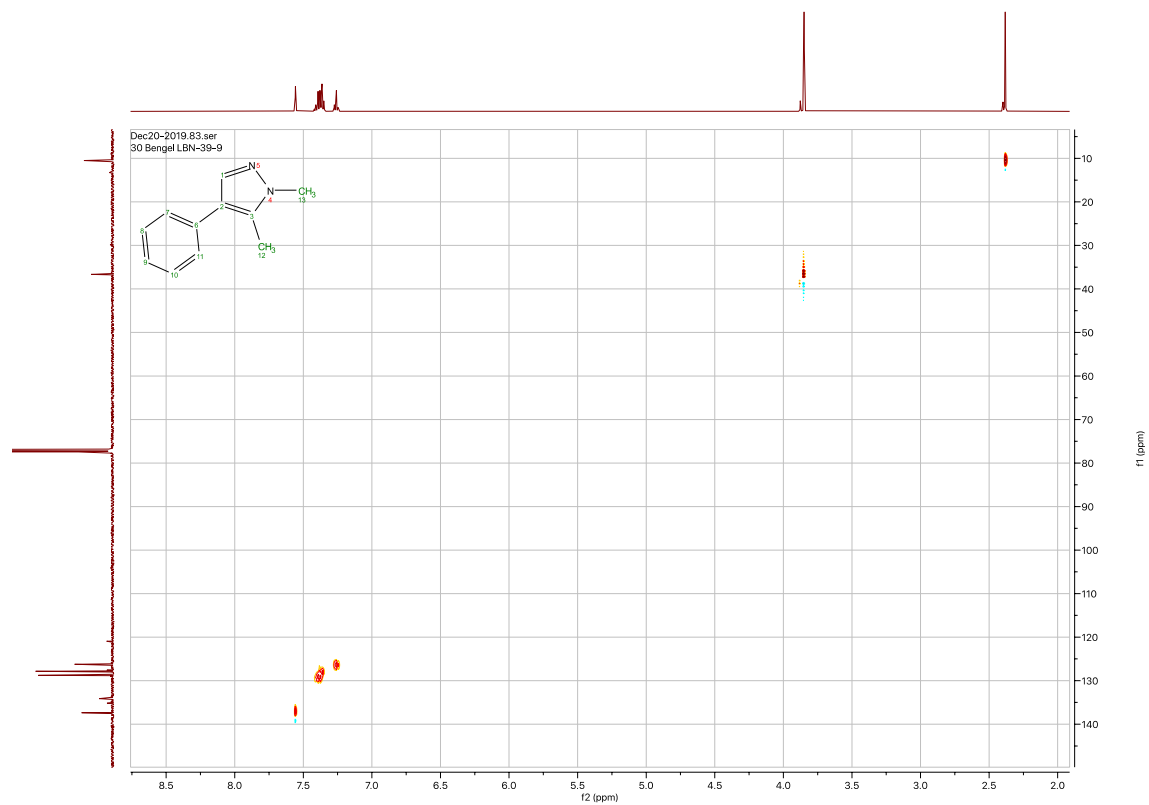

# $^1\text{H}, ^{13}\text{C}$ -HMBC-NMR

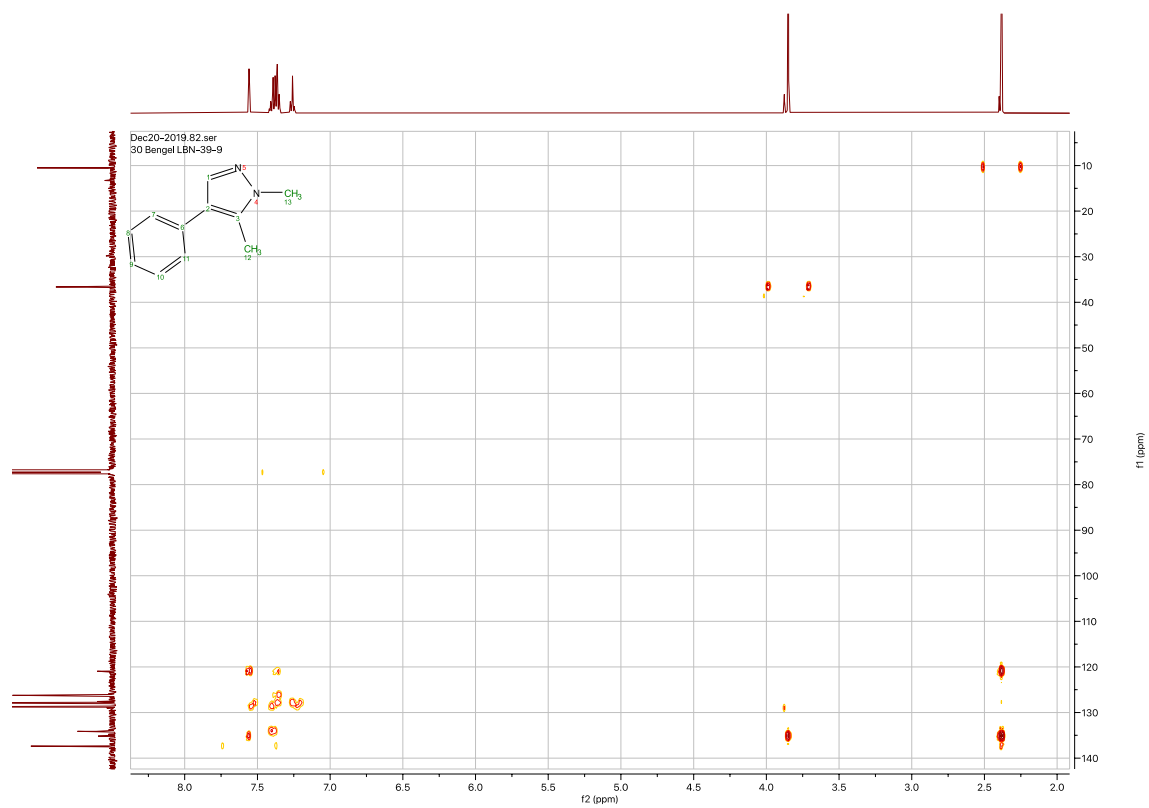

**Mixture of 1,5-dimethyl-4-phenyl-pyrazole (6b, 58%) and 1,3-dimethyl-4-phenyl-pyrazole (6a, 24%):**

**<sup>1</sup>H-NMR**

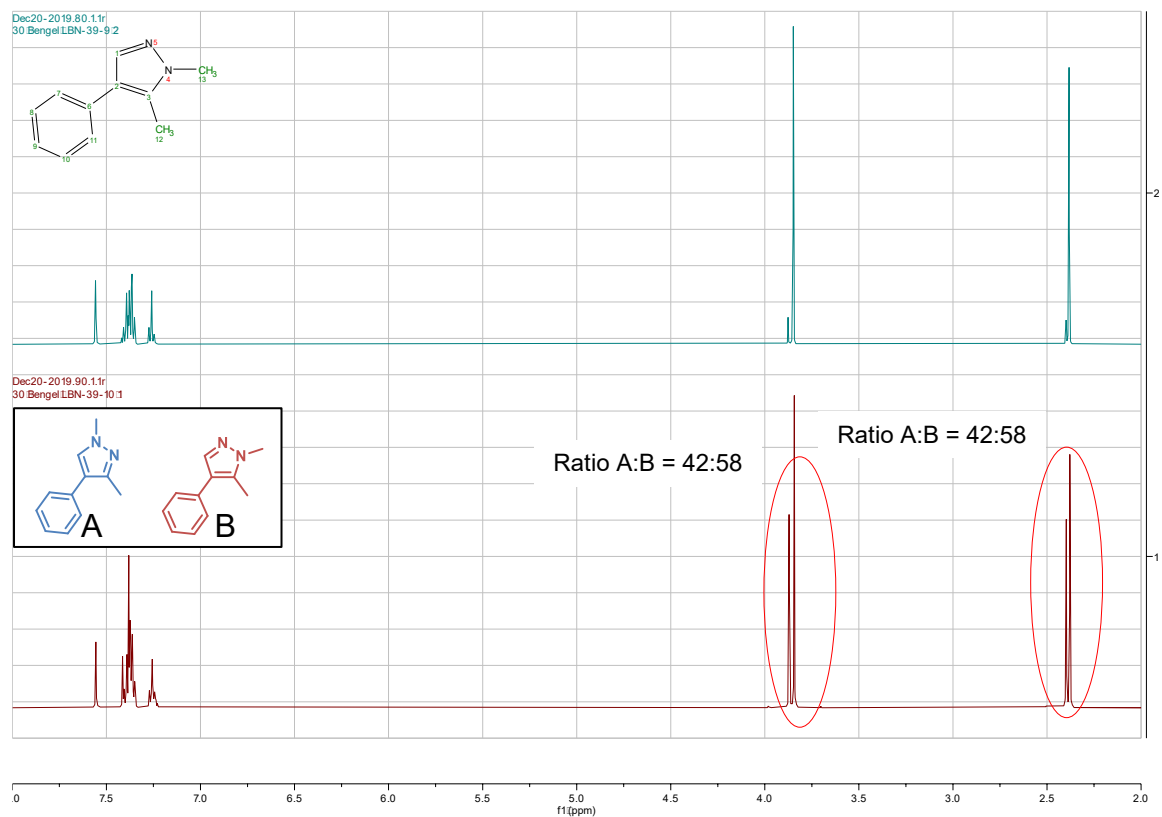



## VII. NMR analysis of enzymatic scale-up methylation of 3-cyclopropylpyrazole (3)

### 1-methyl-5-cyclopropylpyrazole (3b):

**NMR Data:**  $^1\text{H}$  NMR (500 MHz,  $\text{CDCl}_3$ )  $\delta$  7.33 (d,  $J = 1.8$  Hz, 1H), 5.82 (d,  $J = 1.7$  Hz, 1H), 3.89 (s, 3H), 1.71 (m, 1H), 0.96 (m, 2H), 0.65 (m, 2H).  $^{13}\text{C}$  NMR (126 MHz,  $\text{CDCl}_3$ )  $\delta$  144.96, 137.84, 102.41, 36.18, 6.71 (2C), 6.10. Yield: 44.0 mg (37.3%).

### $^1\text{H}$ -NMR

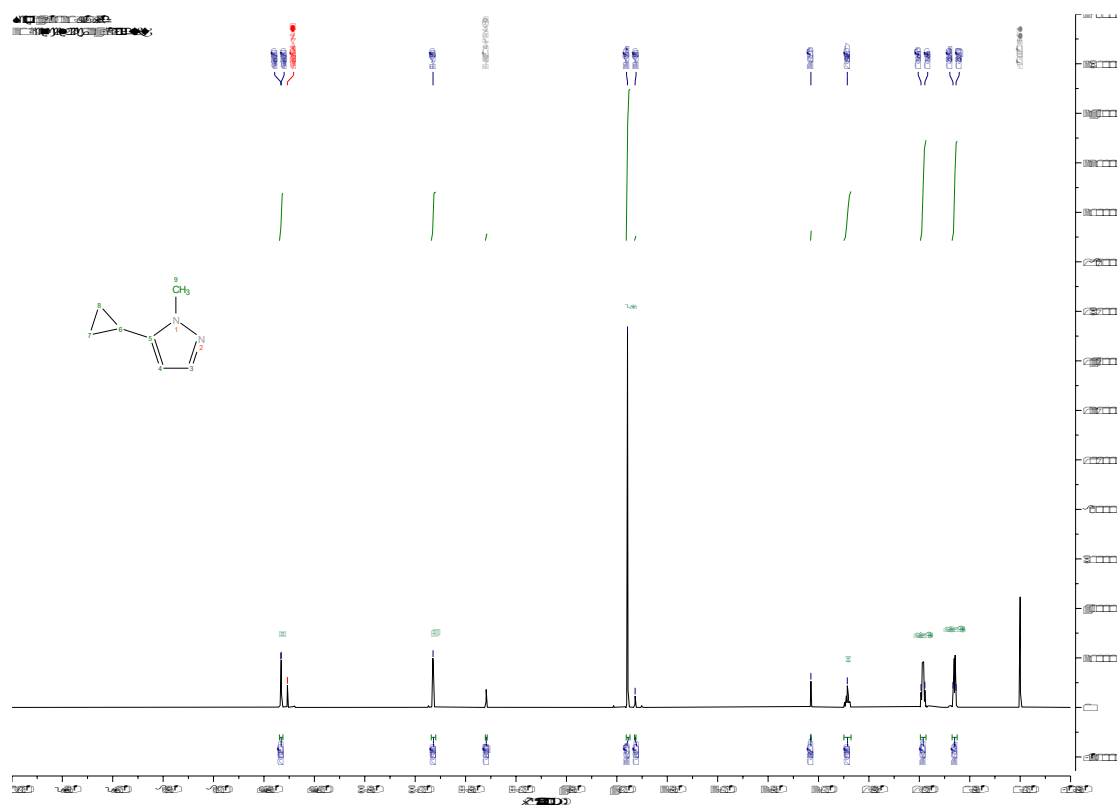

# <sup>13</sup>C-NMR

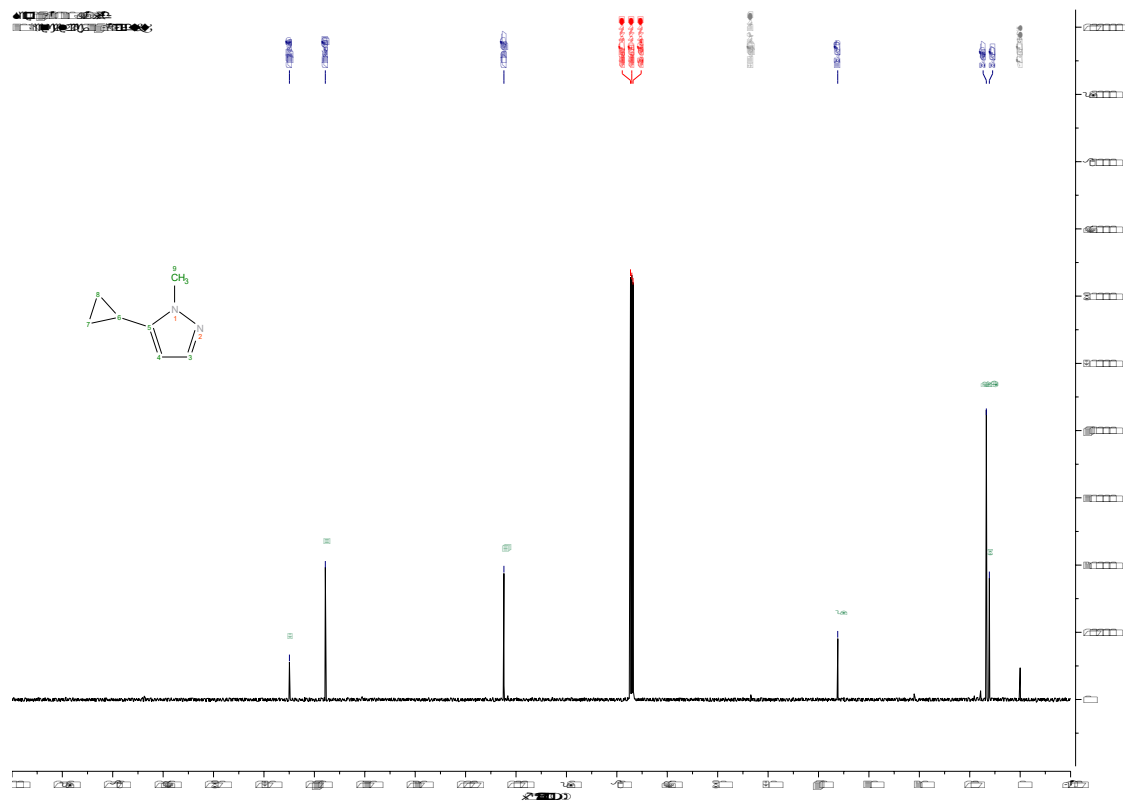

## VIII. HR-ESI-MS analysis of product standards.

### 1,3-dimethylpyrazole (1a):

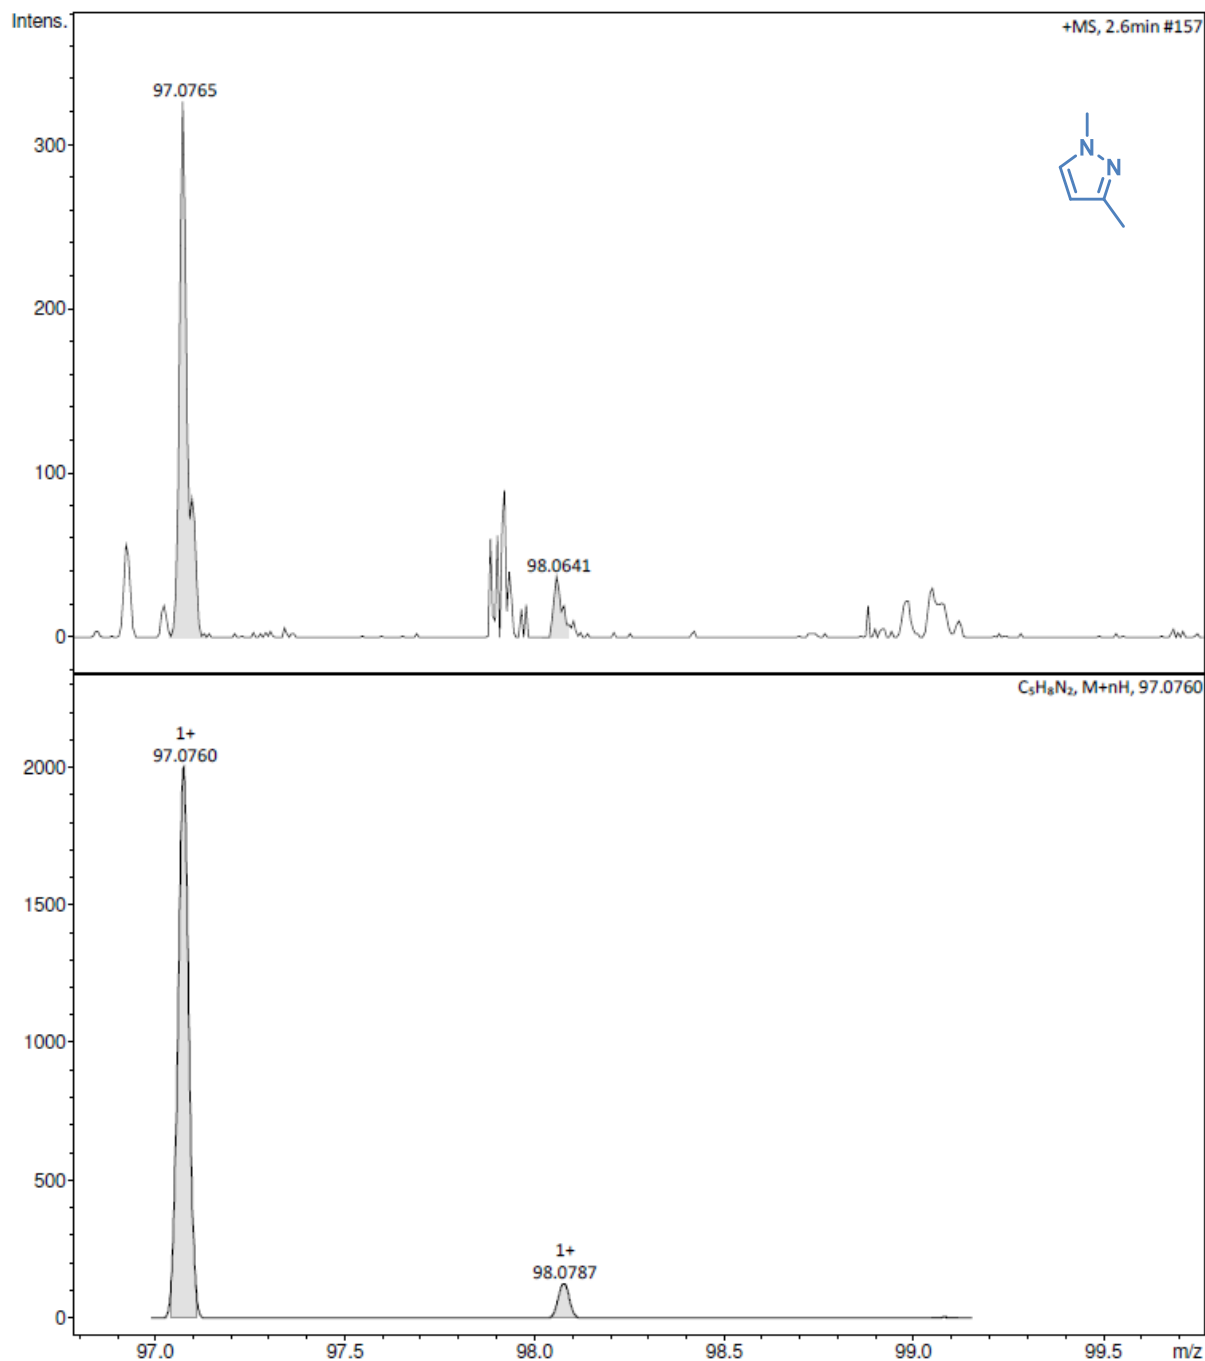

### 1,5-dimethylpyrazole (1b):

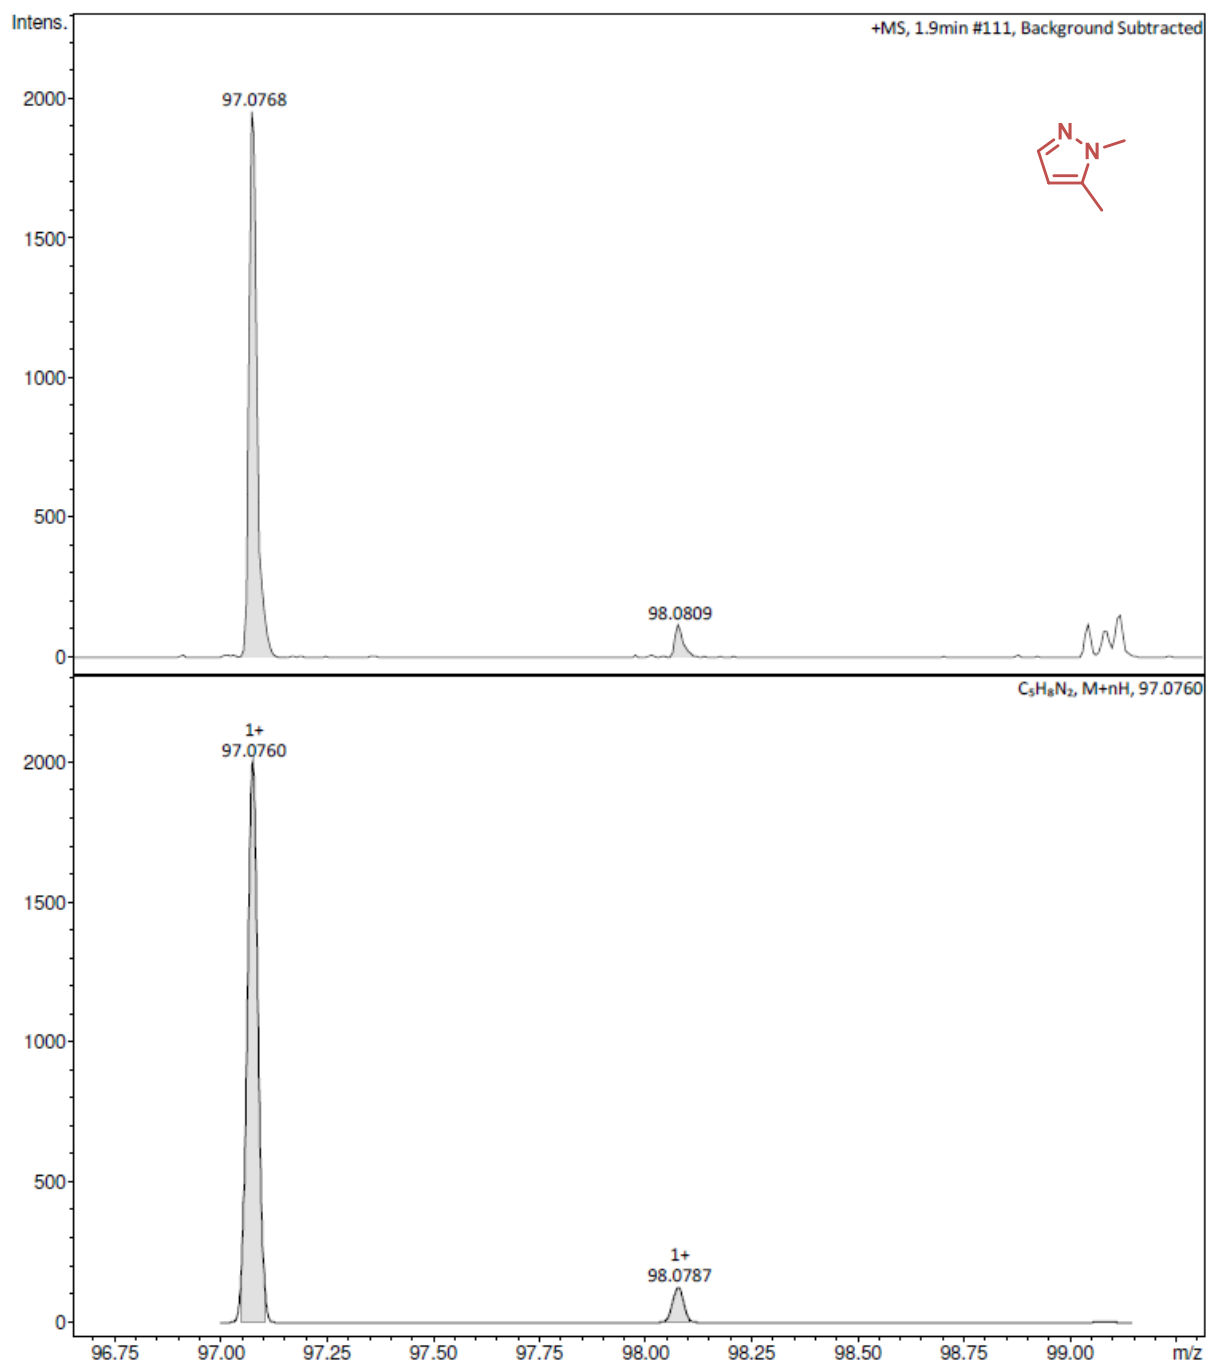

Mixture of 1,3,4-trimethylpyrazole (25.5%) and 1,4,5-trimethylpyrazole (74.5%):

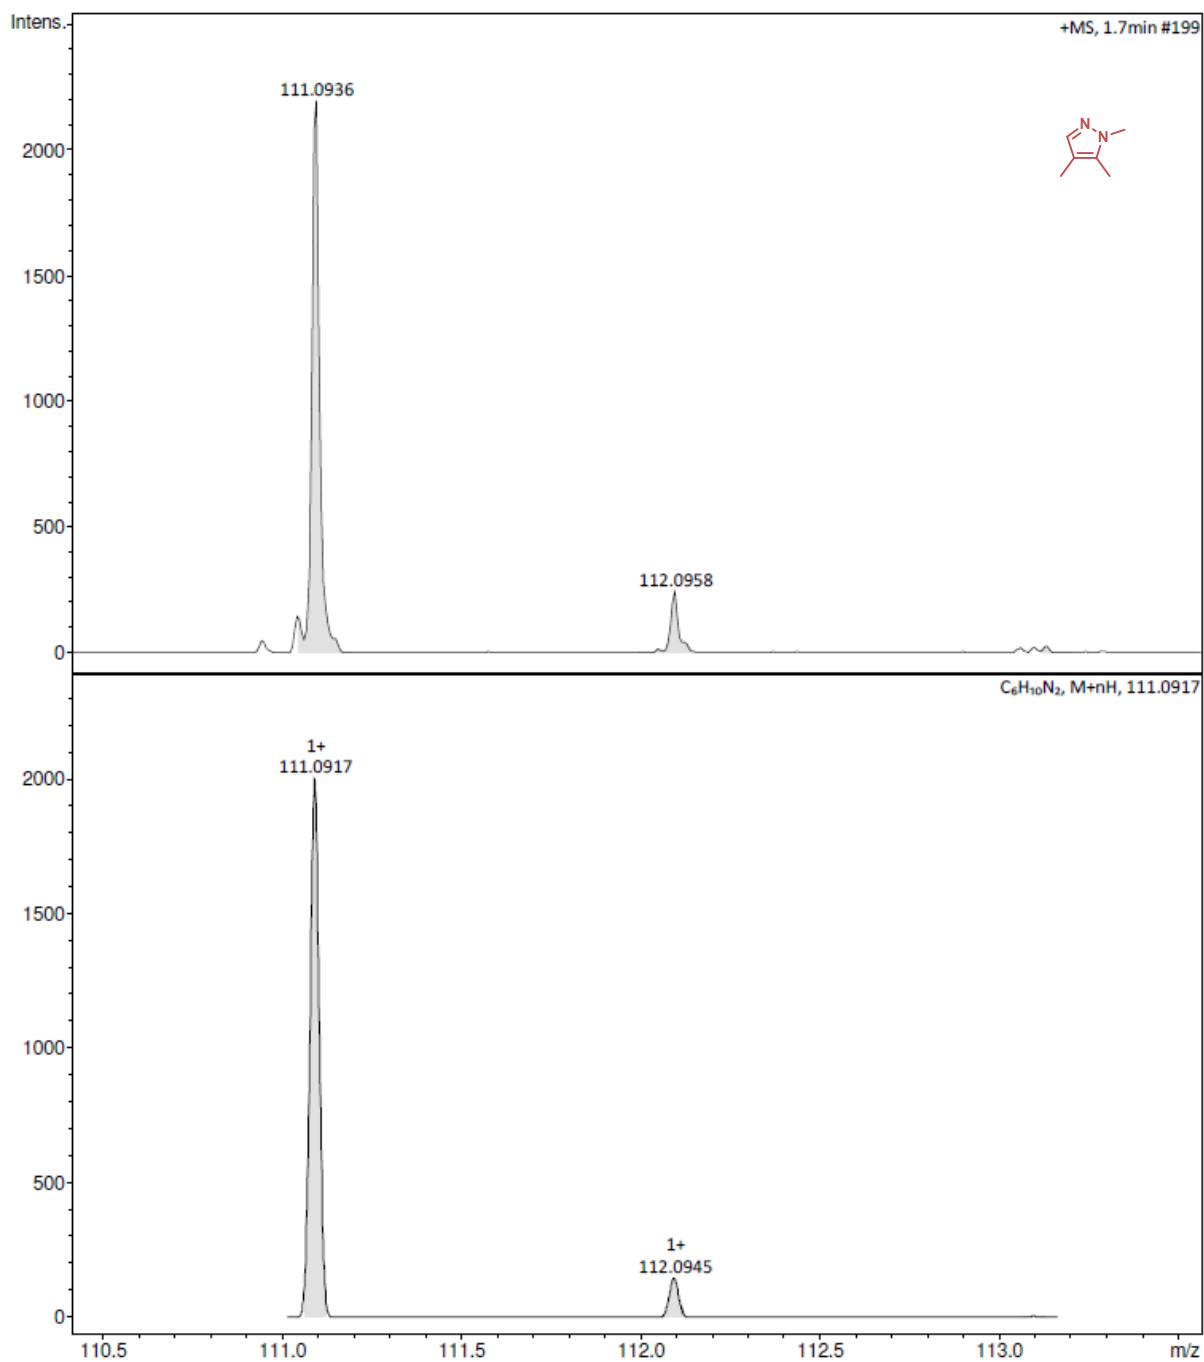

# 1-methyl-3-cyclopropylpyrazole (3a):

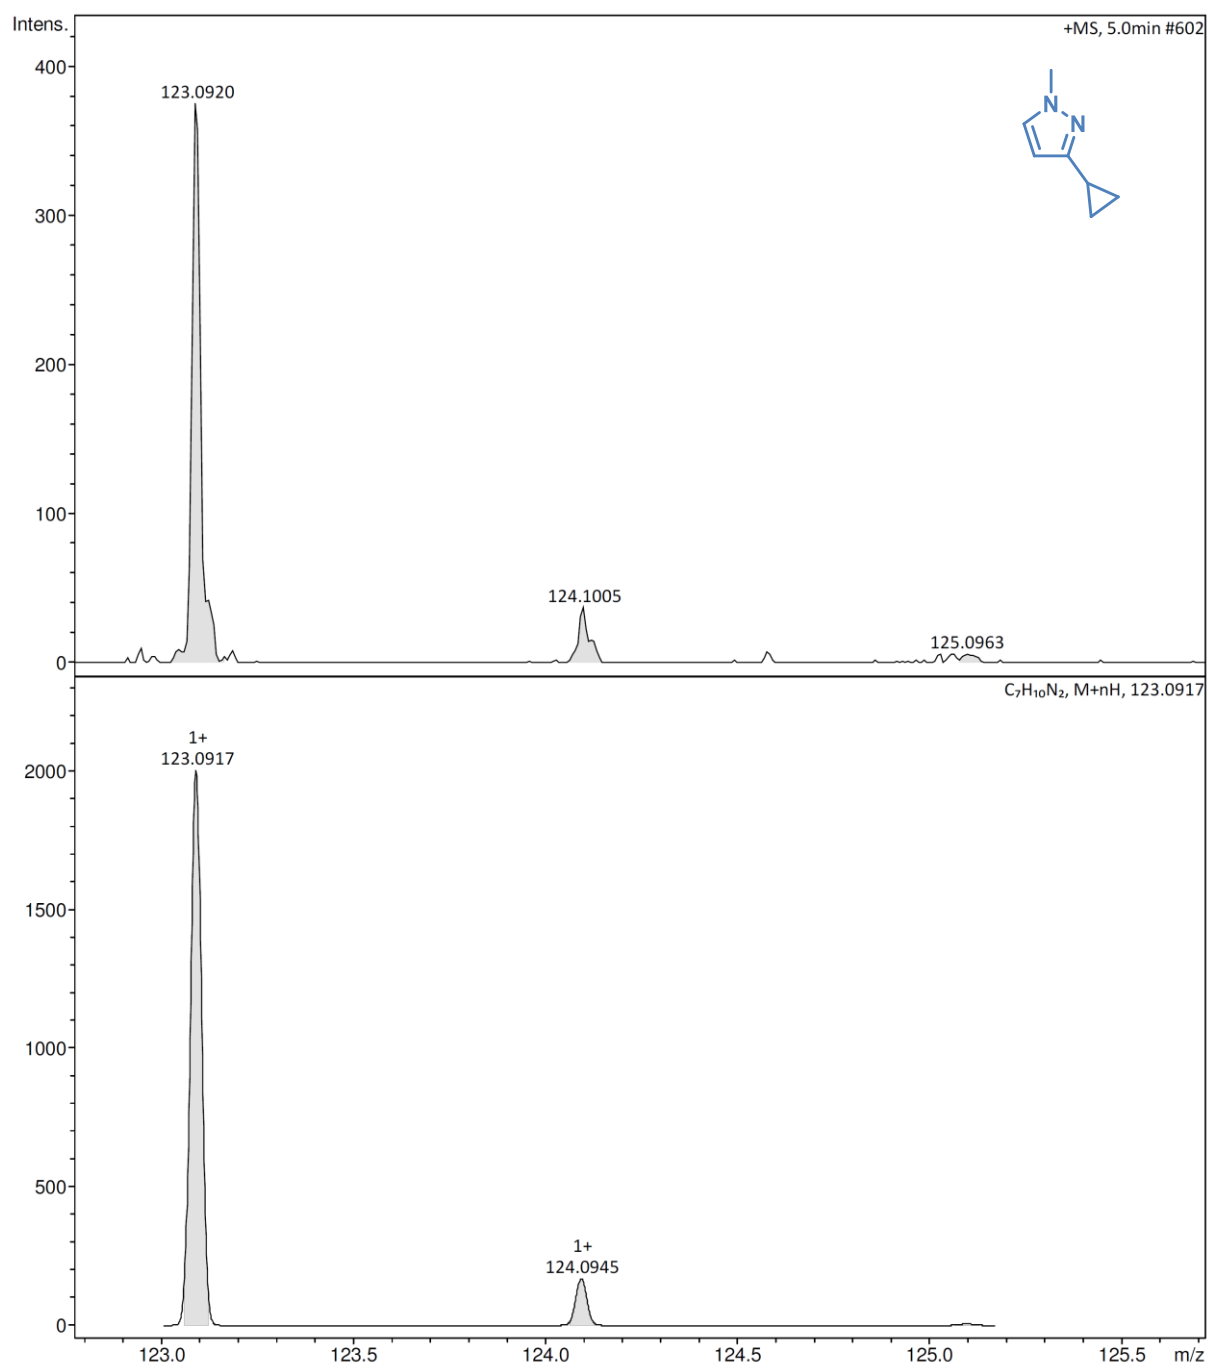

**1-methyl-5-cyclopropylpyrazole (3b):**

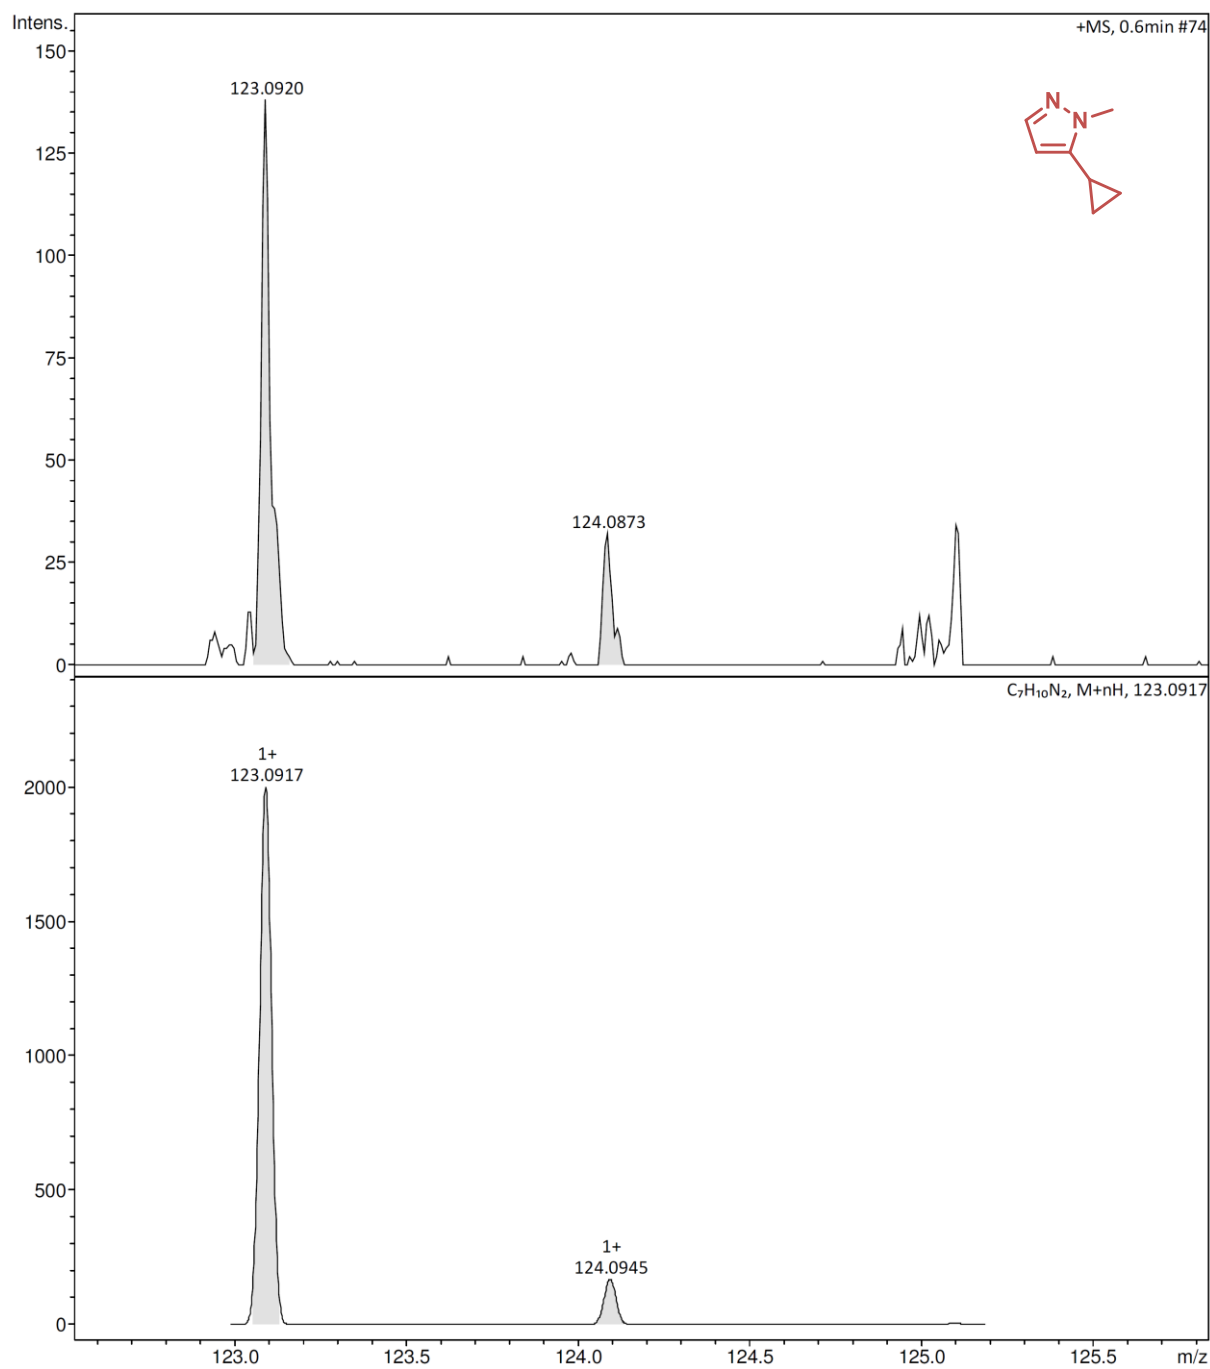

### 1-ethyl-3-cyclopropylpyrazole (7a):

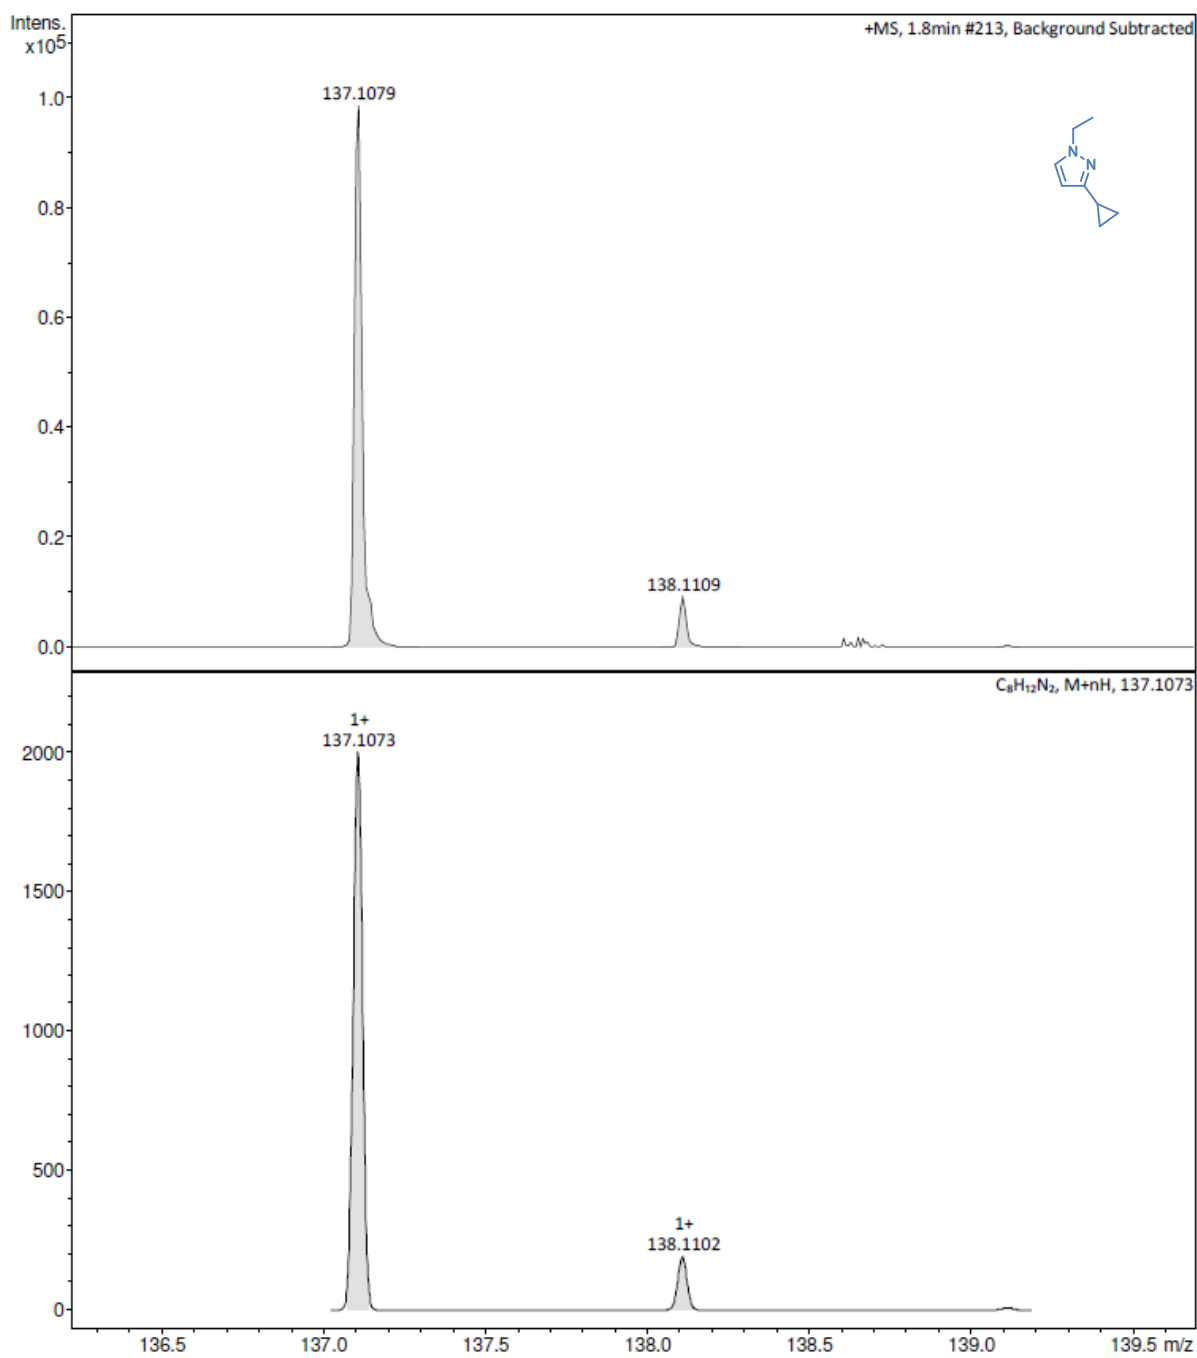



### 1-ethyl-5-cyclopropylpyrazole (7b):

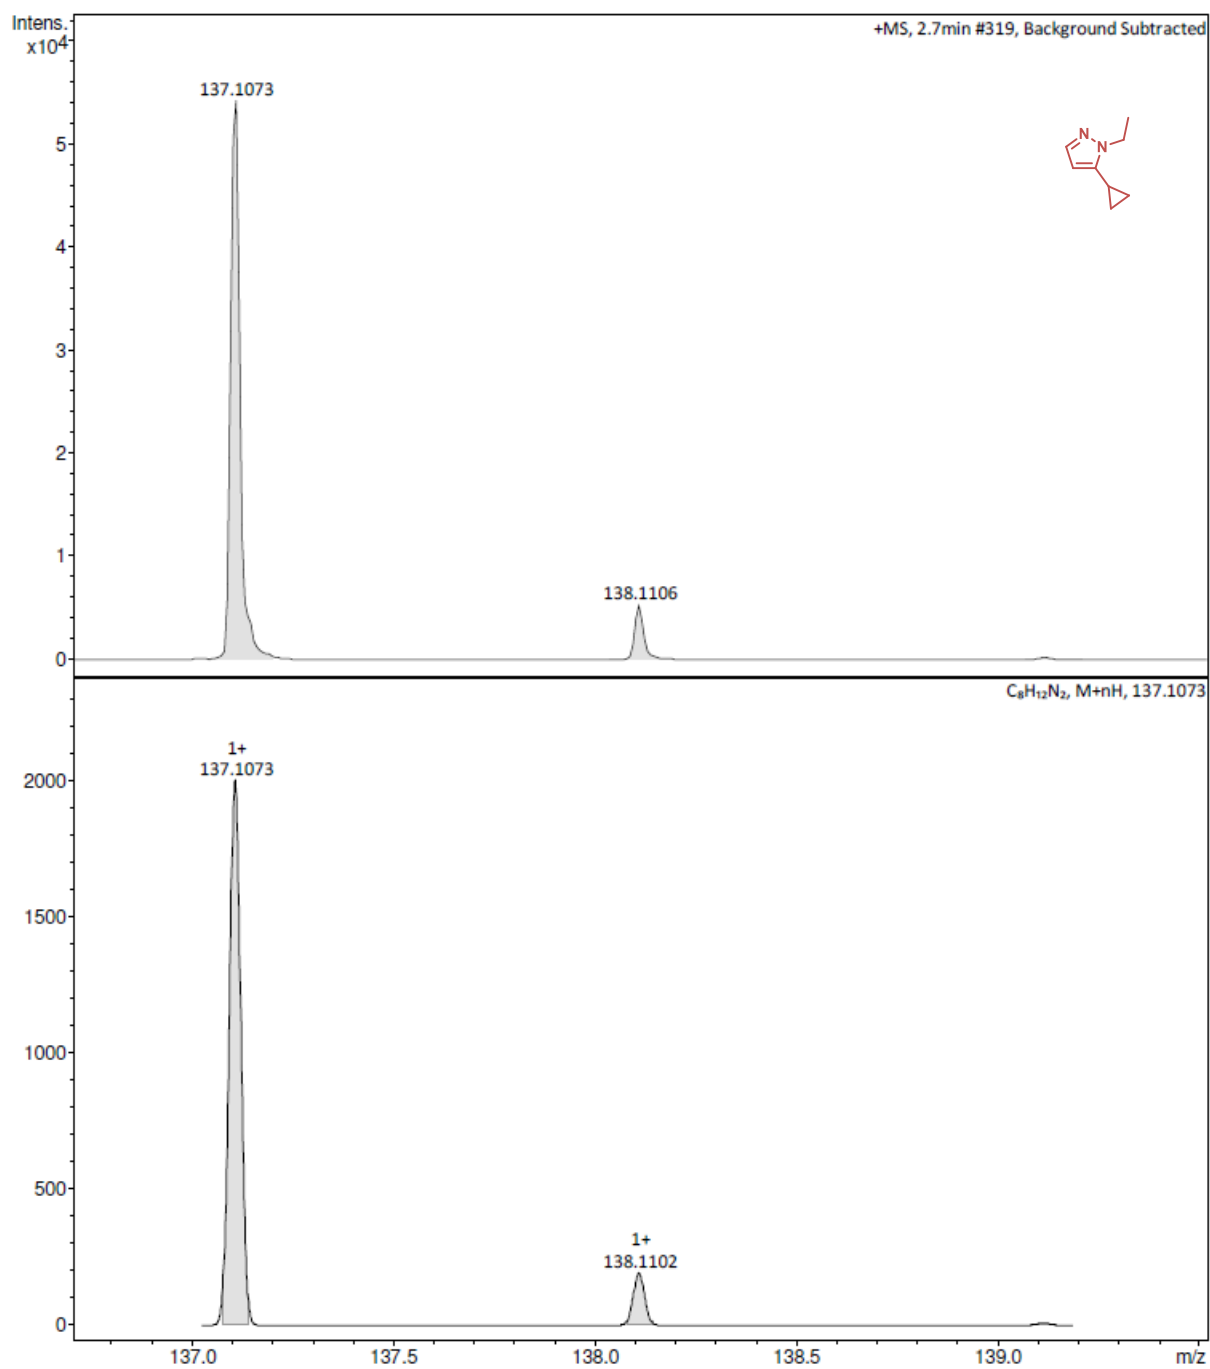

### 1-propyl-3-cyclopropylpyrazole (8a):

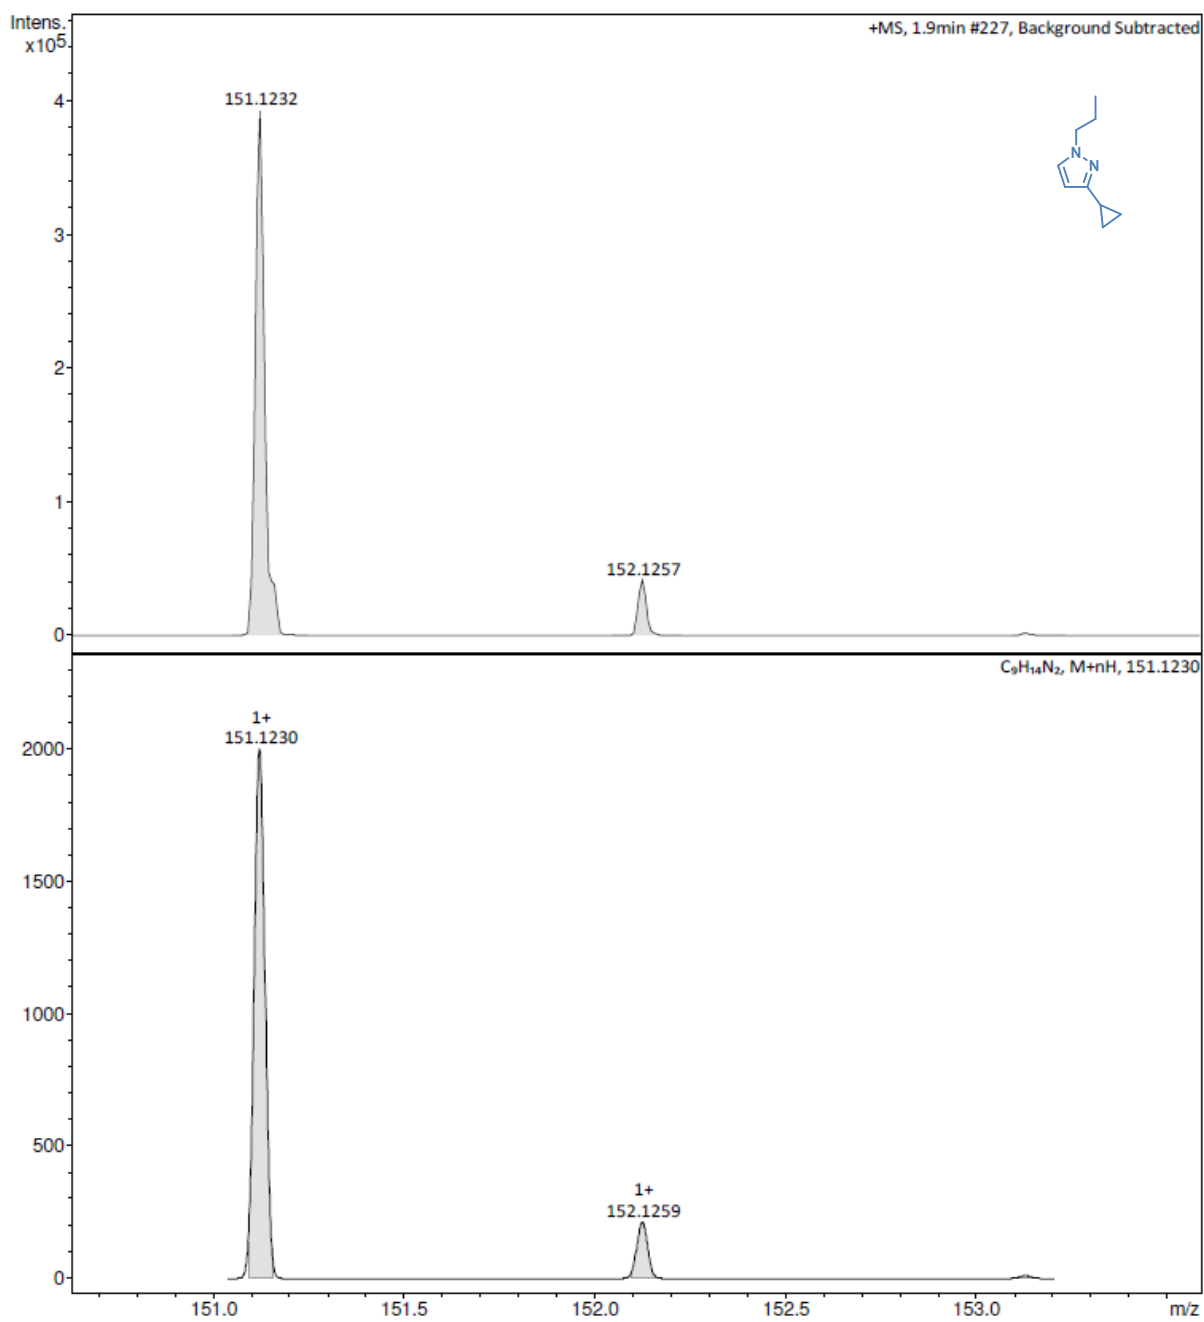

### 1-propyl-5-cyclopropylpyrazole (8b):

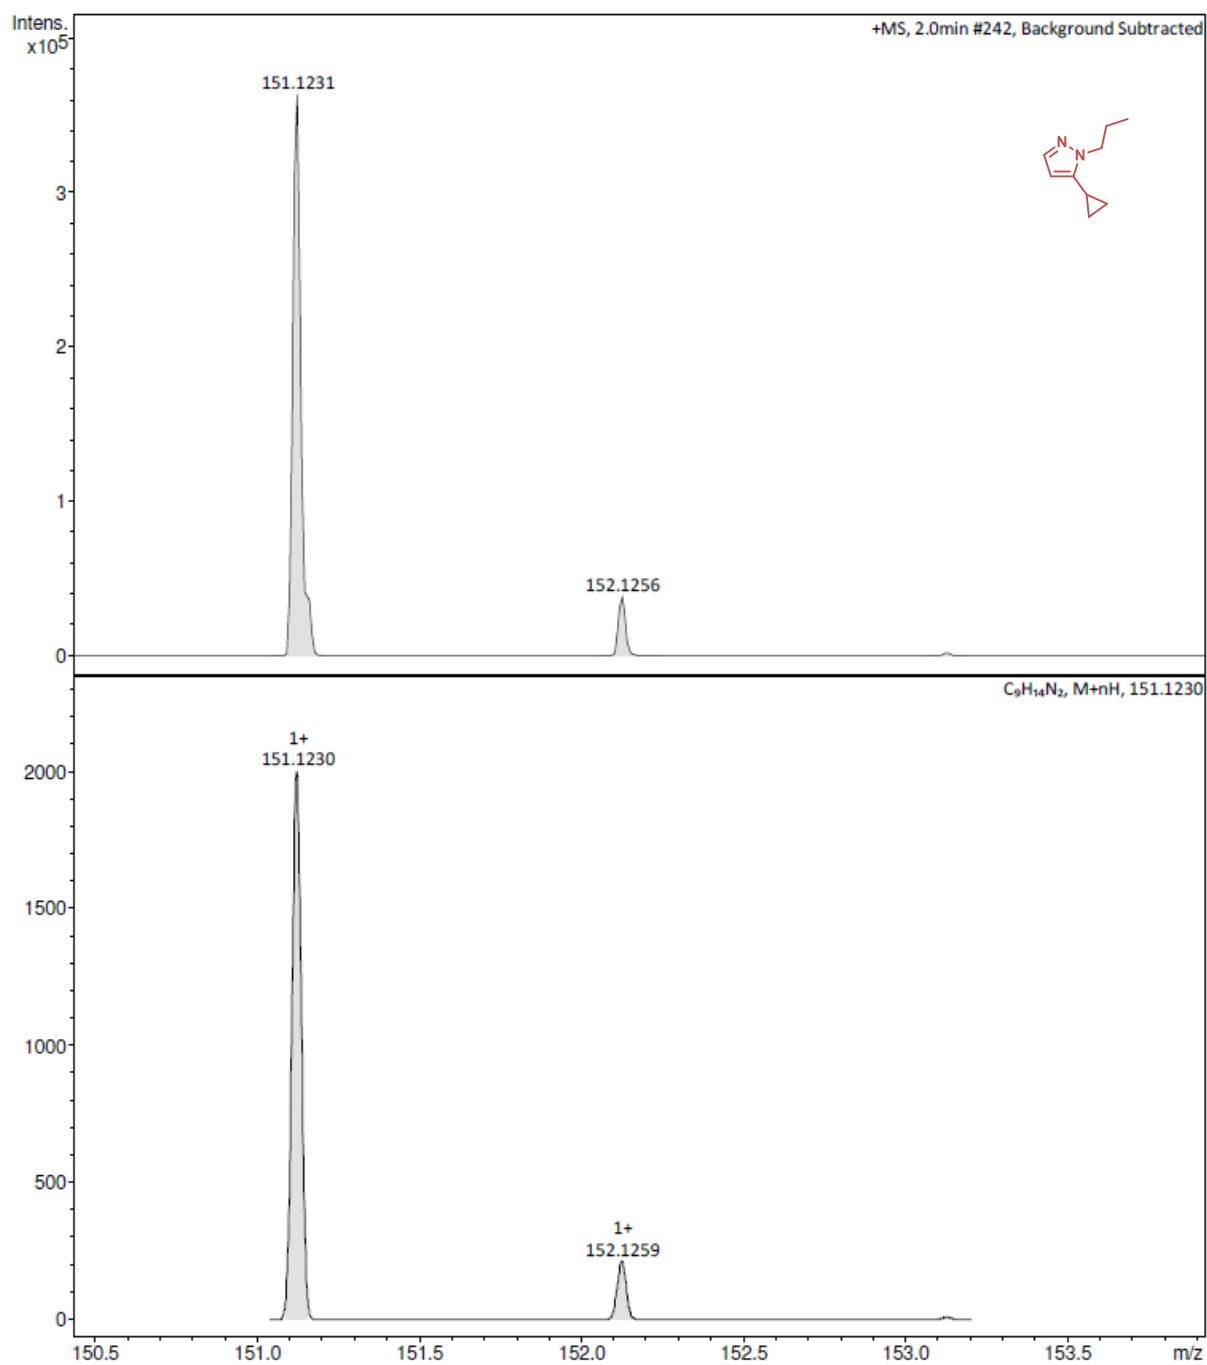

### 1-methyl-3(2-furyl)pyrazole (4a):

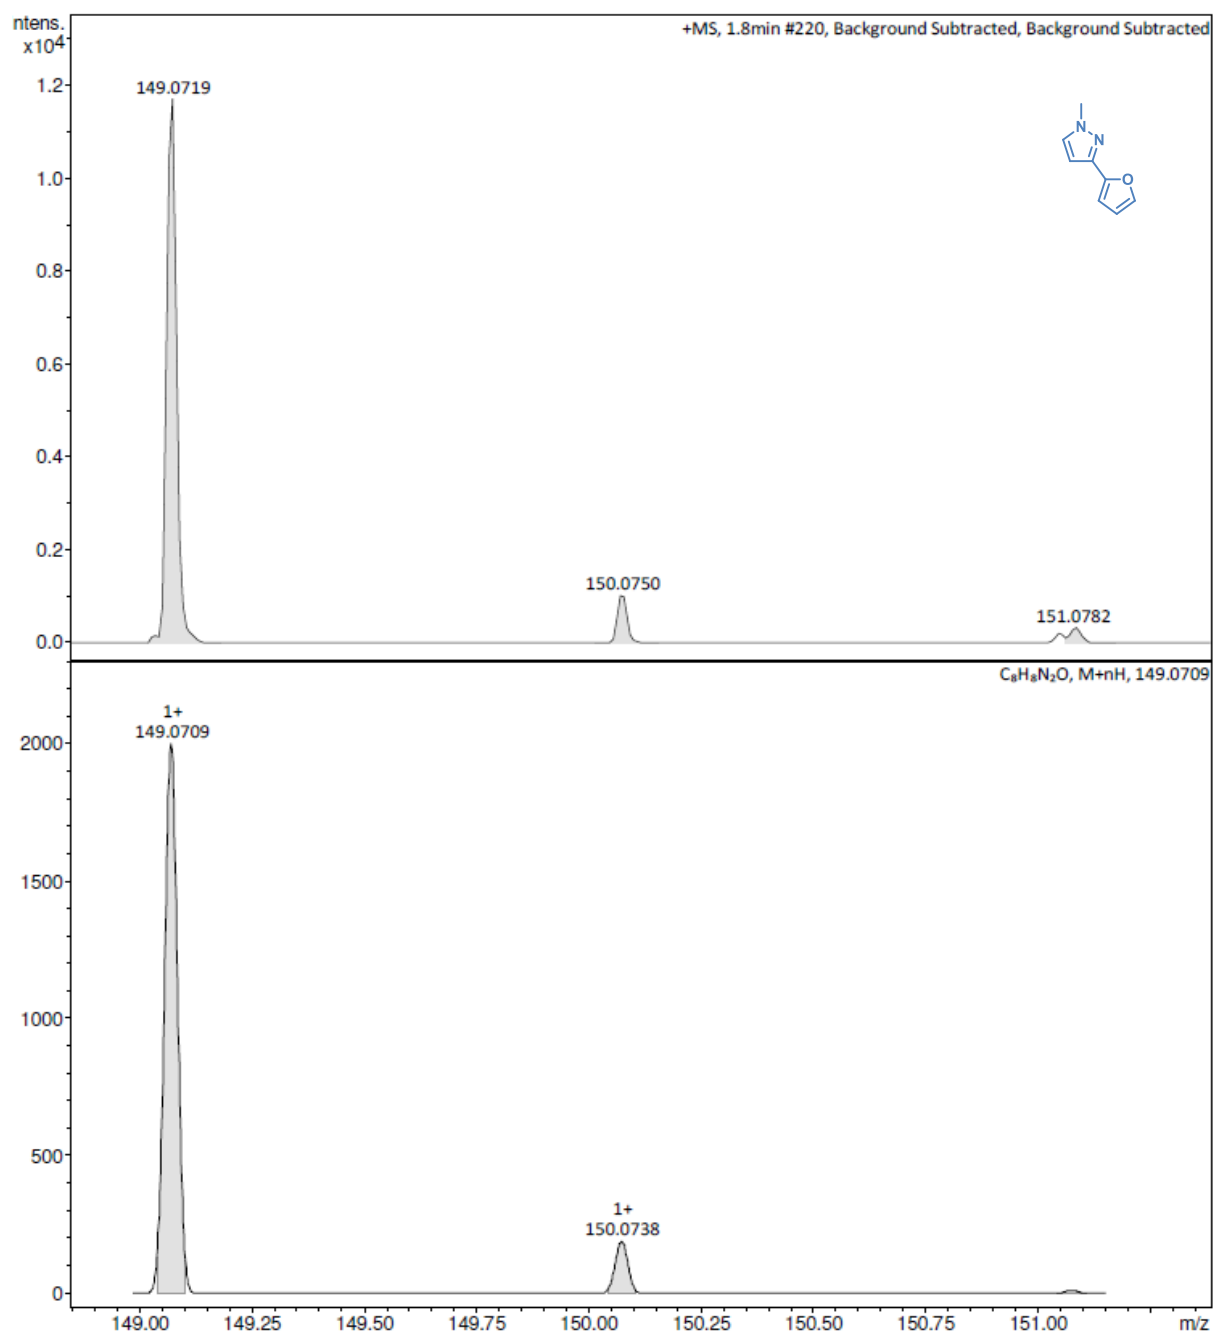

**1-methyl-5(2-furyl)pyrazole (4b):**

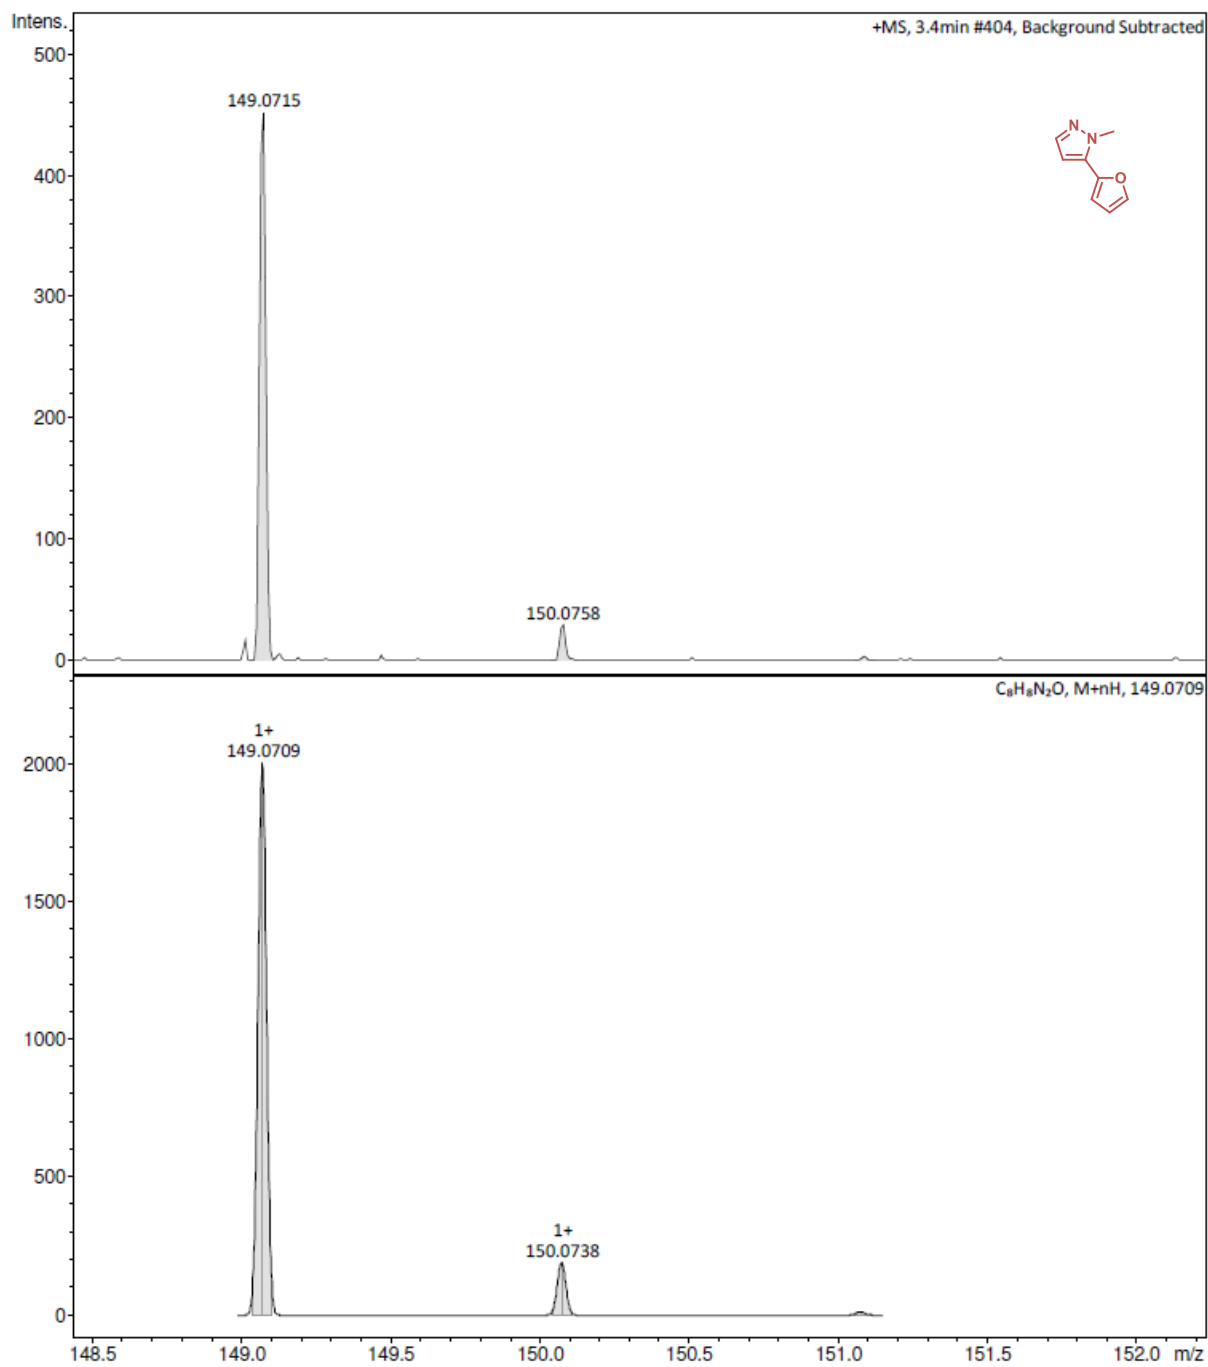

### 1-methyl-3(2-fluorophenyl)pyrazole (5a):

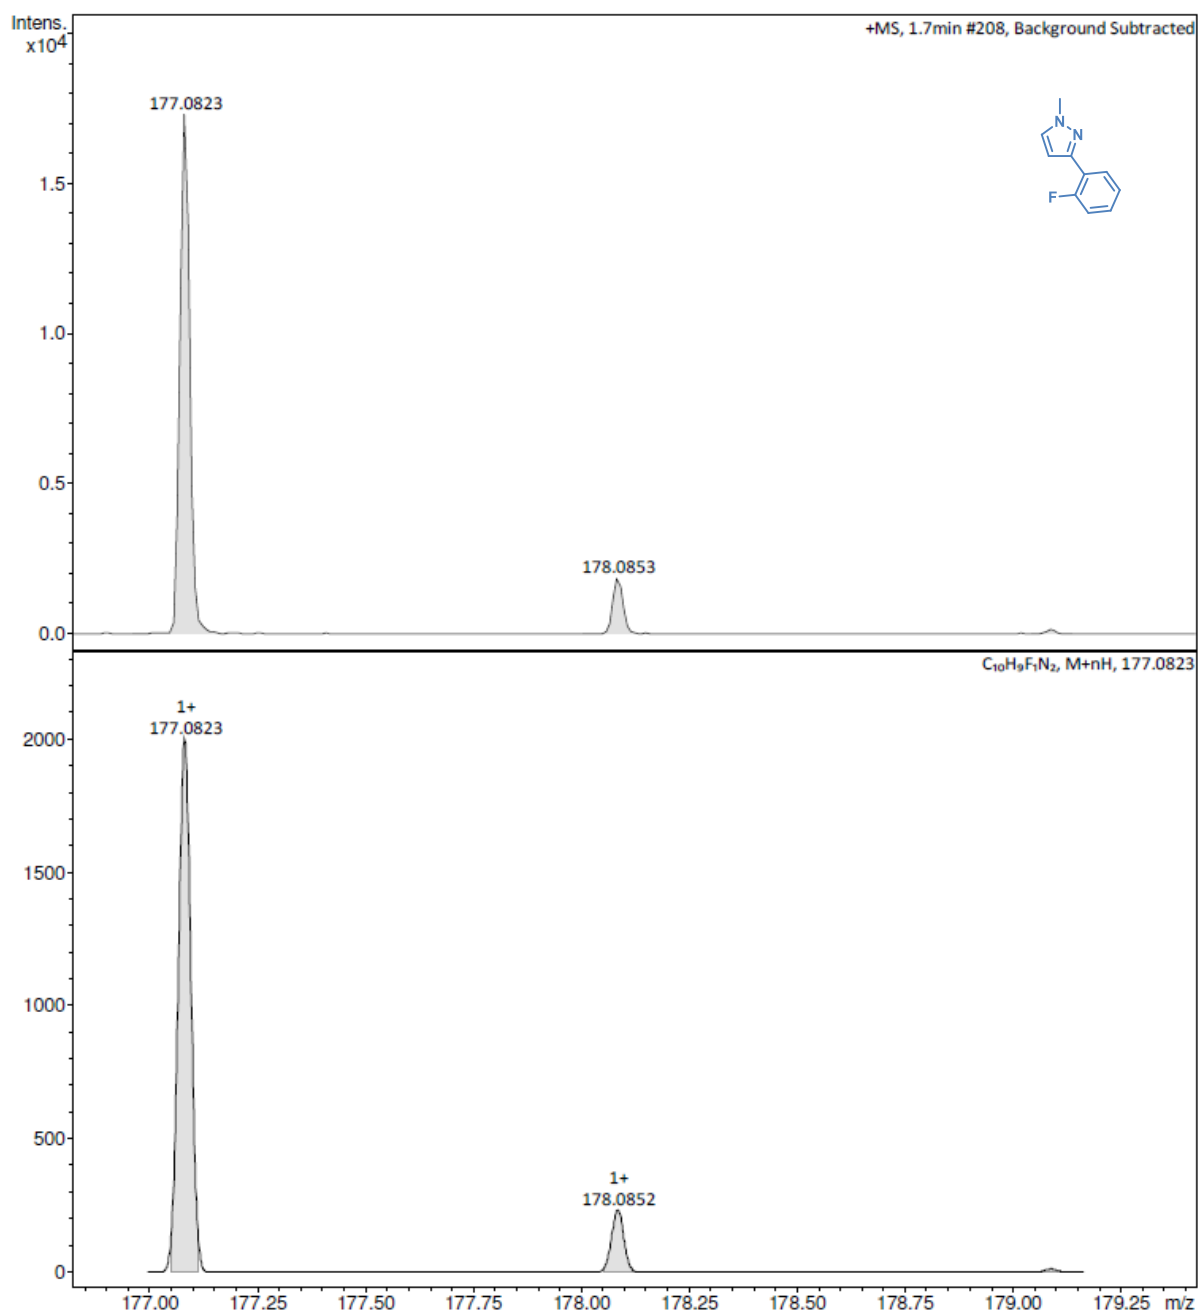

**Mixture of 1-methyl-3(2-fluorophenyl)pyrazole (5a, 76%) and 1-methyl-5(2-fluorophenyl)pyrazole (5b, 24%):**

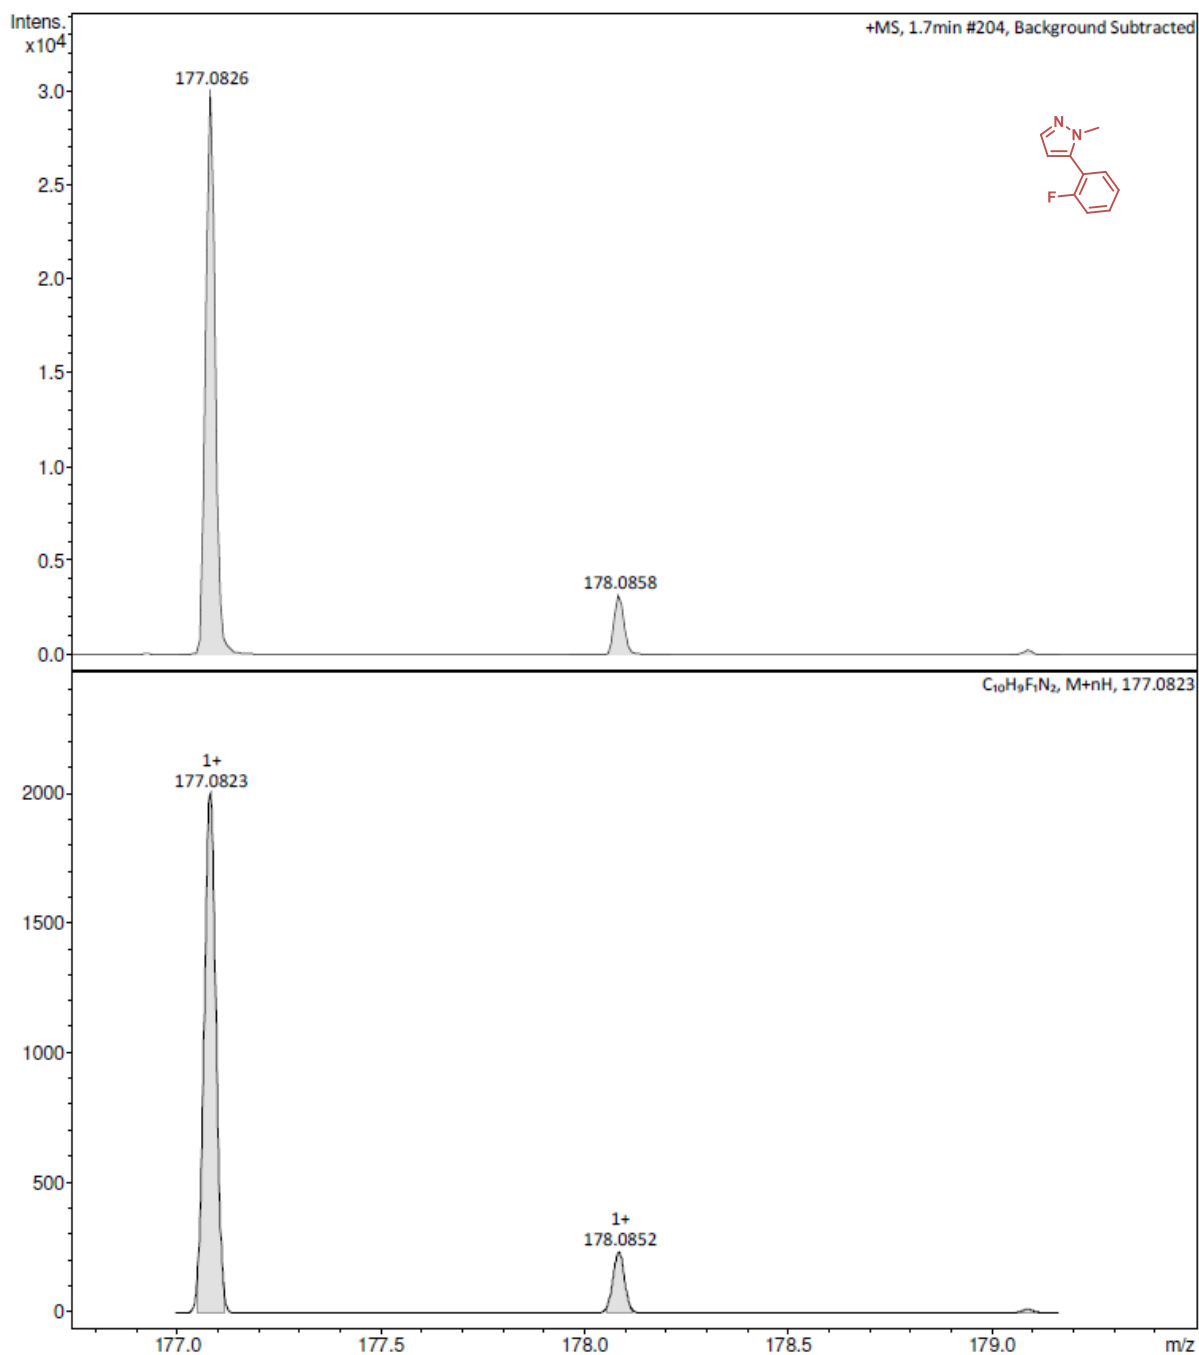

**1,5-dimethyl-4-phenylpyrazole (6b):**

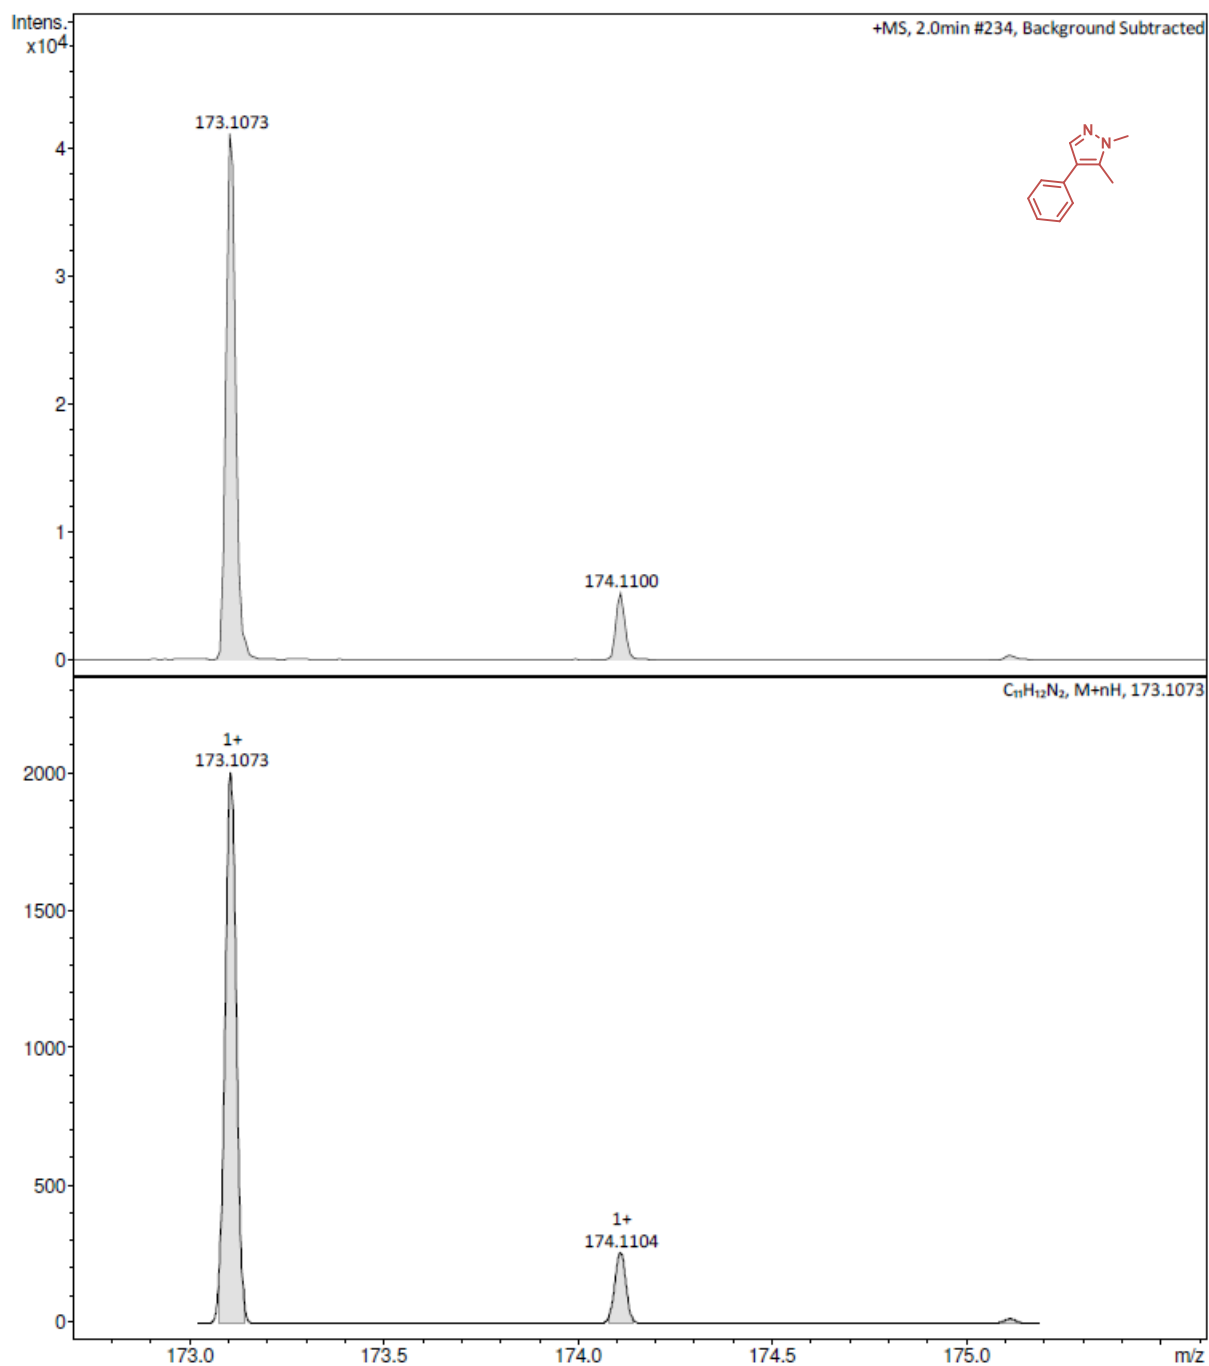



**Mixture of 1,5-dimethyl-4-phenyl-pyrazole (6b, 58%) and 1,3-dimethyl-4-phenyl-pyrazole (6a, 24%):**

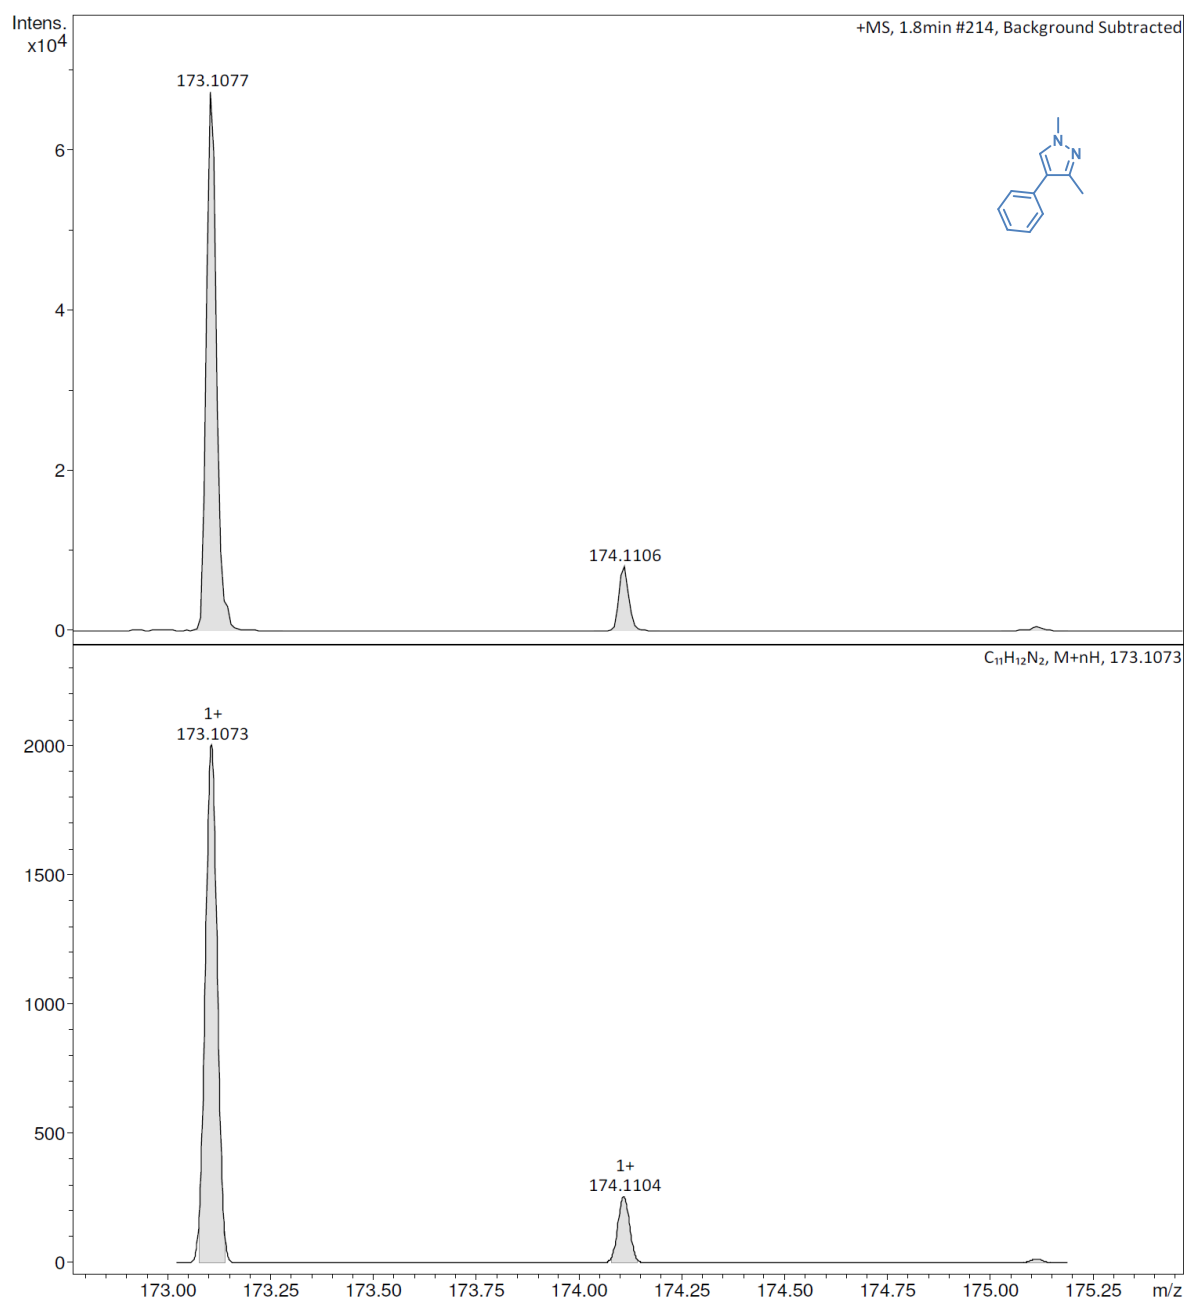

## IX. Enzyme sequences

> (wtNMT)

ATGGAGAGTGGATTTACGAGTAAGGACACTTATTTGAGTCATTTTAACCCGCGGACTACTTAGAAAAATACTACAAGTTTGAAGCCGCCATT  
CAGCAGAATCACA AATTTCTGAAACACCTTTTAAAGAACCTGTTTAAAACTTCTGTTTAGATGGGGTCAAAGGAGATTTGTTGATTGACATCGG  
ATCAGGTCCCA AATTTACCAACTTCTGTCCGCTTGTGAGAGTTTAAAGGAGATCGTCTGACGGACTATTAGATCAA AATCTGCAAGA AACTG  
GAGAAATGGTTAAAGAAAGAACCAGAGGCGTTCGATTGGAGCCAGTTGTGACCTATGTCTGTGATCTTGAAGGAAACCCGCTAAAGGGTCTCTG  
AAAAGGAGGAAAAGCTGCGCAAGCCGTAAGCAAGTATTTAAATGTGATGTTACTCAAAGCCAACCATAGGAGCCGTCCTCCACTGCCCCCGGC  
GGATTGTGATTTGCAACCCCTTGTCTTGAGCAGCTTGTCTGACTTGCCCTACATATTGTCTGTGATCTTGAAGGAAACCCGCTAAAGGGTCTCTG  
CCAGGAGGGTTTCTGGTCATCATGGATGCTTGAAGTCACTTACTACATGATTGGGGAAACAGAGTTTCTCATCTTACCTTTGGGCCGTGAAG  
CCGTAGAAGCGGCCGTAAGGAGGCGGGGTACACCATTGAATGGTTCGAGGTTATTTACAGTCTACAGCTCCACAATGGCAAATAACGAGGG  
CTTATTTTCGCTGGTTGCTCGCAAACTGAGTCGTCCTCTTCTCGAGCACCACCACCACCACCTGA

MESGFTSKDYLHFNPRDYLEKYYKFGSRHSAESQILKHLKLNLFKIFCLDGVKGDLLIDIGSGPTIYQLLSACESFKEIVVTDYSDQNLQEL  
EKWLKKEPEAFDWS PVVTVYVCDLEGNRVKGPKEEKLKQAVKQVLKCDVTSQSQLGAVPLPPADCVLSTLCLDAACPDLPTYCRALRNLSLLK  
PGGFLVIMDALKSSYYMIGE QKFS SLP L GREAVEAAVKEAGYTIEWFEVISQSYSSSTMANNELFSLVARKLSRPLLEHHHHHH

>v1

ATGGAGAGTGGATTTACGAGTAAGGACACTTATTTGAGTCATTTTAACCCGCGGACCCTTAGAAAAATACTACAAGTTTGAAGCCGCCATT  
CAGCAGAATCACA AATTTCTGAAACACCTTTTAAAGAACCTGTTTAAAACTTCTGTTTAGATGGGGTCAAAGGAGATTTGTTGATTGACATCGG  
ATCAGGTCCCA AATTTACCAACTTCTGTCCGCTTGTGAGAGTTTAAAGGAGATCGTCTGACGGACTATTAGATCAA AATCTGCAAGA AACTG  
GAGAAATGGTTAAAGAAAGAACCAGAGGCGTTCGATTGGAGCCAGTTGTGACCTATGTCTGTGATCTTGAAGGAAACCCGCTAAAGGGTCTCTG  
AAAAGGAGGAAAAGCTGCGCAAGCCGTAAGCAAGTATTTAAATGTGATGTTACTCAAAGCCAACCATAGGAGCCGTCCTCCACTGCCCCCGGC  
GGATTGTGATTTGCAACCCCTTGTCTTGCGCAGCTTGTCTGACTTGCCCTACATATTGTCTGTGATCTTGAAGGAAACCCGCTAAAGGGTCTCTG  
CCAGGAGGGTTTCTGGTCATCATGGATatgTTGAAGGgCgTCTACTACATGATTGGGGAAACAGAGTTTCTAgCgTTACCTTTGGGCCGTGAAG  
CCGTAGAAGCGGCCGTAAGGAGGCGGGGTACACCATTGAATGGTTCGAGGTTATTTACAGTCTACAGCTCCACAATGGCAAATAACGAGGG  
CTTATTTTCGCTGGTTGCTCGCAAACTGAGTCGTCCTCTTCTCGAGCACCACCACCACCACCTGA

MESGFTSKDYLHFNPRDHLEKYYKFGSRHSAESQILKHLKLNLFKIFCLDGVKGDLLIDIGSGPTIYQLLSACESFKEIVVTDYSDQNLQEL  
EKWLKKEPEAFDWS PVVTVYVCDLEGNRVKGPKEEKLKQAVKQVLKCDVTSQSQLGAVPLPPADCVLSTLCLCAACPDLPTYCRALRNLSLLK  
PGGFLVIMDKLKSYYMIGE QKFSALPLGREAVEAAVKEAGYTIEWFEVISQSYSSSTMANNELFSLVARKLSRPLLEHHHHHH

>v2

ATGGAGAGTGGATTTACGAGTAAGGACACTTATTTGAGTCATTTTAACCCGCGGACTACTTAGAAAAATACTACAAGTTTGAAGCCGCCATT  
CAGCAGAATCACA AATTTCTGAAACACCTTTTAAAGAACCTGTTTAAAACTTCTGTTTAGATGGGGTCAAAGGAGATTTGTTGATTGACATCGG  
ATCAGGTCCCA AATTTACCAACTTCTGTCCGCTTGTGAGAGTTTAAAGGAGATCGTCTGACGGACTATTAGATCAA AATCTGCAAGA AACTG  
GAGAAATGGTTAAAGAAAGAACCAGAGGCGTTCGATTGGAGCCAGTTGTGACCTATGTCTGTGATCTTGAAGGAAACCCGCTAAAGGGTCTCTG  
AAAAGGAGGAAAAGCTGCGCAAGCCGTAAGCAAGTATTTAAATGTGATGTTACTCAAAGCCAACCATAGGAGCCGTCCTCCACTGCCCCCGGC  
GGATTGTGATTTGCAACCCCTTGTCTTGcACG CAGCTTGTCTGACTTGCCCTACATATTGTCTGTGATCTTGAAGGAAACCCGCTAAAGGGTCTCTG  
CCAGGAGGGTTTCTGGTCATCATGGATatgTTGAAGTgcTCTACTACATGATTGGGGAAACAGAGTTTCTAgCgTTACCTTTGGGCCGTGAAG  
CCGTAGAAGCGGCCGTAAGGAGGCGGGGTACACCATTGAATGGTTCGAGGTTATTTACAGTCTACAGCTCCACAATGGCAAATgCgGAGGG  
CTTATTTTCGCTGGTTGCTCGCAAACTGAGTCGTCCTCTTCTCGAGCACCACCACCACCACCTGA

MESGFTSKDYLHFNPRDYLEKYYKFGSRHSAESQILKHLKLNLFKIFCLDGVKGDLLIDIGSGPTIYQLLSACESFKEIVVTDYSDQNLQEL  
EKWLKKEPEAFDWS PVVTVYVCDLEGNRVKGPKEEKLKQAVKQVLKCDVTSQSQLGAVPLPPADCVLSTLCLHAACPDLPTYCRALRNLSLLK  
PGGFLVIMDKLKSYYMIGE QKFSALPLGREAVEAAVKEAGYTIEWFEVISQSYSSSTMANCEGLFSLVARKLSRPLLEHHHHHH

>v3

ATGGAGAGTGGATTTACGAGTAAGGACACTTATTTGAGTCATTTTAACCCGCGGACTACTTAGAAAAATACTACAAGTTTGAAGCCGCCATT  
CAGCAGAATCACA AATTTCTGAAACACCTTTTAAAGAACCTGTTTAAAACTTCTGTTTAGATGGGGTCAAAGGAGATTTGTTGATTGACATCGG  
ATCAGGTCCCA AATTTACCAACTTCTGTCCGCTTGTGAGAGTTTAAAGGAGATCGTCTGACGGACTATTAGATCAA AATCTGCAAGA AACTG  
GAGAAATGGTTAAAGAAAGAACCAGAGGCGTTCGATTGGAGCCAGTTGTGACCTATGTCTGTGATCTTGAAGGAAACCCGCTAAAGGGTCTCTG  
AAAAGGAGGAAAAGCTGCGCAAGCCGTAAGCAAGTATTTAAATGTGATGTTACTCAAAGCCAACCATAGGAGCCGTCCTCCACTGCCCCCGGC  
GGATTGTGATTTGCAACCCCTTGTCTTGcACG CAGCTTGTCTGACTTGCCCTACATATTGTCTGTGATCTTGAAGGAAACCCGCTAAAGGGTCTCTG  
CCAGGAGGGTTTCTGGTCATCATGGATcCTTGAAGctTCTACTACATGATTGGGGAAACAGAGTTTCTCATCTTACCTTTGGGCCGTGAAG  
CCGTAGAAGCGGCCGTAAGGAGGCGGGGTACACCATTGAATGGTTCGAGGTTATTTACAGTCTTgGACTCCACAATGGCAAATcCGAGGG  
CTTATTTTCGCTGGTTGCTCGCAAACTGAGTCGTCCTCTTCTCGAGCACCACCACCACCACCTGA

MESGFTSKDYLHFNPRDYLEKYYKFGSRHSAESQILKHLKLNLFKIFCLDGVKGDLLIDIGSGPTIYQLLSACESFKEIVVTDYSDQNLQEL  
EKWLKKEPEAFDWS PVVTVYVCDLEGNRVKGPKEEKLKQAVKQVLKCDVTSQSQLGAVPLPPADCVLSTLCLHAACPDLPTYCRALRNLSLLK  
PGGFLVIMDSLKRSYYMIGE QKFS SLP L GREAVEAAVKEAGYTIEWFEVISQSWSSSTMANSEGLFSLVARKLSRPLLEHHHHHH

>v4

ATGGAGAGTGGATTTACGAGTAAGGACACTTATTTGAGTCATTTTAACCCGCGGACTtCTTAGAAAAATACTACAAGTTTGAAGCCGCCATT  
CAGCAGAATCACA AATTTCTGAAACACCTTTTAAAGAACCTGTTTAAAACTTCTGTTTAGATGGGGTCAAAGGAGATTTGTTGATTGACATCGG  
ATCAGGTCCCA AATTTACCAACTTCTGTCCGCTTGTGAGAGTTTAAAGGAGATCGTCTGACGGACTATTAGATCAA AATCTGCAAGA AACTG  
GAGAAATGGTTAAAGAAAGAACCAGAGGCGTTCGATTGGAGCCAGTTGTGACCTATGTCTGTGATCTTGAAGGAAACCCGCTAAAGGGTCTCTG  
AAAAGGAGGAAAAGCTGCGCAAGCCGTAAGCAAGTATTTAAATGTGATGTTACTCAAAGCCAACCATAGGAGCCGTCCTCCACTGCCCCCGGC  
GGATTGTGATTTGCAACCCCTTGTCTTGcACG CAGCTTGTCTGACTTGCCCTACATATTGTCTGTGATCTTGAAGGAAACCCGCTAAAGGGTCTCTG  
CCAGGAGGGTTTCTGGTCATCATGGATatgTTGAAGTgcTCTACTACATGATTGGGGAAACAGAGTTTCTCATgTTACCTTTGGGCCGTGAAG  
CCGTAGAAGCGGCCGTAAGGAGGCGGGGTACACCATTGAATGGTTCGAGGTTATTTACAGTCTTgGACTCCACAATGGCAAATcCGAGGG  
CTTATTTTCGCTGGTTGCTCGCAAACTGAGTCGTCCTCTTCTCGAGCACCACCACCACCACCTGA

MESGFTSKDYLHFNPRDFLEKYYKFGSRHSAESQILKHLKLNLFKIFCLDGVKGDLLIDIGSGPTIYQLLSACESFKEIVVTDYSDQNLQEL  
EKWLKKEPEAFDWS PVVTVYVCDLEGNRVKGPKEEKLKQAVKQVLKCDVTSQSQLGAVPLPPADCVLSTLCLHAACPDLPTYCRALRNLSLLK  
PGGFLVIMDKLKSYYMIGE QKFSCLPLGREAVEAAVKEAGYTIEWFEVISQSYSSSTMANNELFSLVARKLSRPLLEHHHHHH

>v5

ATGGAGAGTGGATTTACGAGTAAGGACACTTATTTGAGTCATTTTAACCCGCGGACTACTTAGAAAAATACTACAAGTTTGAAGCCGCCATT  
CAGCAGAATCACAAATTTCTGAAACACCTTTTAAAGAACCTGTTTAAAAATCTTCTGTTTAGATGGGGTCAAAGGAGATTTGTTGATTGACATCGG  
ATCAGGTTCCACAATTTACCAACTTCTGTCCGCTTGTGAGAGTTTTAAGGAGATCGTCTGACGGACTATTAGATCAAAATCTGCAAGAACTG  
GAGAAATGGTTAAAGAAAGAACCAGAGGCGTTCGATTGGAGCCAGTTGTGACCTATGCTGTGATCTTGAAGGAAACCCGCTAAAGGGTCTCTG  
AAAAGGAGGAAAAGCTGCGCAAGCCGTAAGCAAGTATTAATAATGTGATGTTACTCAAAGCCAACCATAGGAGCCGCTCCACTGCCCCCGGC  
GGATTGTGATTGTCAACCCCTTGTCTTgCAGCAGCTTGTCTGACTTGCCTACATATTTGCTGTCATTACGCAACTTAGGAAGTTTGCCTAAA  
CCAGGAGGGTTTTCTGGTATCATGGATatgTTGAAGgCgTCTACTACATGATTGGGGAACAGAGTTTCTCagCgTTACCTTTGGGCCGTGAAG  
CCGTAGAAGCGGCCGTAAGGAGGCGGGGTACACCATTGAATGGTTCGAGGTTATTTACAGTCTTcAGCTCCACAATGGCAAATAACGAGGG  
CTTATTTTCGCTGGTTGCTCGCAAACTGAGTCGTCTCTTCTCGAGCACCACCACCACCACCACTGA

MESGFTSKDYLHFNPRDYLEKYYKFGSRHSAESQILKHLKLNLFKIFCLDGVKGDLLIDIGSGPTIYQLLSACESFKEIVVTDYSDQNLQEL  
EKWLKKEPEAFDWSVVVTVYVCDLEGNRVKGPKEEKLQAVKQVVKCDVTSQSQLGAVPLPPADCVLSTLCLHAACPDLPTYCRALRNLGSLK  
PGGFLVIMDMLKASYMIGEQKFSALPLGREAVEAAVKEAGYTIEWFEVISQSFSSSTMANNELFSLVARKLSRPLLEHHHHHH

>v6

ATGGAGAGTGGATTTACGAGTAAGGACACTTATTTGAGTCATTTTAACCCGCGGACTACTTAGAAAAATACTACAAGTTTGAAGCCGCCATT  
CAGCAGAATCACAAATTTCTGAAACACCTTTTAAAGAACCTGTTTAAAAATCTTCTGTTTAGATGGGGTCAAAGGAGATTTGTTGATTGACATCGG  
ATCAGGTTCCACAATTTACCAACTTCTGTCCGCTTGTGAGAGTTTTAAGGAGATCGTCTGACGGACTATTAGATCAAAATCTGCAAGAACTG  
GAGAAATGGTTAAAGAAAGAACCAGAGGCGTTCGATTGGAGCCAGTTGTGACCTATGCTGTGATCTTGAAGGAAACCCGCTAAAGGGTCTCTG  
AAAAGGAGGAAAAGCTGCGCAAGCCGTAAGCAAGTATTAATAATGTGATGTTACTCAAAGCCAACCATAGGAGCCGCTCCACTGCCCCCGGC  
GGATTGTGATTGTCAACCCCTTGTCTTgCAGCAGCTTGTCTGACTTGCCTACATATTTGCTGTCATTACGCAACTTAGGAAGTTTGCCTAAA  
CCAGGAGGGTTTTCTGGTATCATGGATaCCTTGAAGTgCCTACTACATGATTGGGGAACAGAGTTTCTCagCgTTACCTTTGGGCCGTGAAG  
CCGTAGAAGCGGCCGTAAGGAGGCGGGGTACACCATTGAATGGTTCGAGGTTATTTACAGTCTTACAGCTCCACAATGatgAATAACGAGGG  
CTTATTTTCGCTGGTTGCTCGCAAACTGAGTCGTCTCTTCTCGAGCACCACCACCACCACCACCTGA

MESGFTSKDYLHFNPRDYLEKYYKFGSRHSAESQILKHLKLNLFKIFCLDGVKGDLLIDIGSGPTIYQLLSACESFKEIVVTDYSDQNLQEL  
EKWLKKEPEAFDWSVVVTVYVCDLEGNRVKGPKEEKLQAVKQVVKCDVTSQSQLGAVPLPPADCVLSTLCLHAACPDLPTYCRALRNLGSLK  
PGGFLVIMDTLKSYYMIGEQKFSALPLGREAVEAAVKEAGYTIEWFEVISQSYSSTMNNEGLFSLVARKLSRPLLEHHHHHH

>v7

ATGGAGAGTGGATTTACGAGTAAGGACACTTATTTGAGTCATTTTAACCCGCGGACTACTTAGAAAAATACTACAAGTTTGAAGCCGCCATT  
CAGCAGAATCACAAATTTCTGAAACACCTTTTAAAGAACCTGTTTAAAAATCTTCTGTTTAGATGGGGTCAAAGGAGATTTGTTGATTGACATCGG  
ATCAGGTTCCACAATTTACCAACTTCTGTCCGCTTGTGAGAGTTTTAAGGAGATCGTCTGACGGACTATTAGATCAAAATCTGCAAGAACTG  
GAGAAATGGTTAAAGAAAGAACCAGAGGCGTTCGATTGGAGCCAGTTGTGACCTATGCTGTGATCTTGAAGGAAACCCGCTAAAGGGTCTCTG  
AAAAGGAGGAAAAGCTGCGCAAGCCGTAAGCAAGTATTAATAATGTGATGTTACTCAAAGCCAACCATAGGAGCCGCTCCACTGCCCCCGGC  
GGATTGTGATTGTCAACCCCTTGTCTTgCAGCAGCTTGTCTGACTTGCCTACATATTTGCTGTCATTACGCAACTTAGGAAGTTTGCCTAAA  
CCAGGAGGGTTTTCTGGTATCATGGATgCCTACTACATGATTGGGGAACAGAGTTTCTCagCgTTACCTTTGGGCCGTGAAG  
CCGTAGAAGCGGCCGTAAGGAGGCGGGGTACACCATTGAATGGTTCGAGGTTATTTACAGTCTTgGAGCTCCACAATGGCAAATgCAGGG  
CTTATTTTCGCTGGTTGCTCGCAAACTGAGTCGTCTCTTCTCGAGCACCACCACCACCACCACCTGA

MESGFTSKDYLHFNPRDYLEKYYKFGSRHSAESQILKHLKLNLFKIFCLDGVKGDLLIDIGSGPTIYQLLSACESFKEIVVTDYSDQNLQEL  
EKWLKKEPEAFDWSVVVTVYVCDLEGNRVKGPKEEKLQAVKQVVKCDVTSQSQLGAVPLPPADCVLSTLCLHAACPDLPTYCRALRNLGSLK  
PGGFLVIMDALKQSYMIGEQKFSALPLGREAVEAAVKEAGYTIEWFEVISQSWSSTMANAEGLFSLVARKLSRPLLEHHHHHH

>v8

ATGGAGAGTGGATTTACGAGTAAGGACACTTATTTGAGTCATTTTAACCCGCGGACTACTTAGAAAAATACTACAAGTTTGAAGCCGCCATT  
CAGCAGAATCACAAATTTCTGAAACACCTTTTAAAGAACCTGTTTAAAAATCTTCTGTTTAGATGGGGTCAAAGGAGATTTGTTGATTGACATCGG  
ATCAGGTTCCACAATTTACCAACTTCTGTCCGCTTGTGAGAGTTTTAAGGAGATCGTCTGACGGACTATTAGATCAAAATCTGCAAGAACTG  
GAGAAATGGTTAAAGAAAGAACCAGAGGCGTTCGATTGGAGCCAGTTGTGACCTATGCTGTGATCTTGAAGGAAACCCGCTAAAGGGTCTCTG  
AAAAGGAGGAAAAGCTGCGCAAGCCGTAAGCAAGTATTAATAATGTGATGTTACTCAAAGCCAACCATAGGAGCCGCTCCACTGCCCCCGGC  
GGATTGTGATTGTCAACCCCTTGTCTTgCAGCAGCTTGTCTGACTTGCCTACATATTTGCTGTCATTACGCAACTTAGGAAGTTTGCCTAAA  
CCAGGAGGGTTTTCTGGTATCATGGGgTatgTTGAAGTgCCTACTACATGATTGGGGAACAGAGTTTCTCagCgTTACCTTTGGGCCGTGAAG  
CCGTAGAAGCGGCCGTAAGGAGGCGGGGTACACCATTGAATGGTTCGAGGTTATTTACAGTCTTcAGCTCCACAATGGCAAATAACGAGGG  
CTTATTTTCGCTGGTTGCTCGCAAACTGAGTCGTCTCTTCTCGAGCACCACCACCACCACCACCTGA

MESGFTSKDYLHFNPRDYLEKYYKFGSRHSAESQILKHLKLNLFKIFCLDGVKGDLLIDIGSGPTIYQLLSACESFKEIVVTDYSDQNLQEL  
EKWLKKEPEAFDWSVVVTVYVCDLEGNRVKGPKEEKLQAVKQVVKCDVTSQSQLGAVPLPPADCVLSTLCLDAACPDLPTYCRALRNLGSLK  
PGGFLVIMGLKCSYYMIGEQKFSALPLGREAVEAAVKEAGYTIEWFEVISQSFSSSTMANNELFSLVARKLSRPLLEHHHHHH

>v9

ATGGAGAGTGGATTTACGAGTAAGGACACTTATTTGAGTCATTTTAACCCGCGGACTACTTAGAAAAATACTACAAGTTTGAAGCCGCCATT  
CAGCAGAATCACAAATTTCTGAAACACCTTTTAAAGAACCTGTTTAAAAATCTTCTGTTTAGATGGGGTCAAAGGAGATTTGTTGATTGACATCGG  
ATCAGGTTCCACAATTTACCAACTTCTGTCCGCTTGTGAGAGTTTTAAGGAGATCGTCTGACGGACTATTAGATCAAAATCTGCAAGAACTG  
GAGAAATGGTTAAAGAAAGAACCAGAGGCGTTCGATTGGAGCCAGTTGTGACCTATGCTGTGATCTTGAAGGAAACCCGCTAAAGGGTCTCTG  
AAAAGGAGGAAAAGCTGCGCAAGCCGTAAGCAAGTATTAATAATGTGATGTTACTCAAAGCCAACCATAGGAGCCGCTCCACTGCCCCCGGC  
GGATTGTGATTGTCAACCCCTTGTCTTgCAGCAGCTTGTCTGACTTGCCTACATATTTGCTGTCATTACGCAACTTAGGAAGTTTGCCTAAA  
CCAGGAGGGTTTTCTGGTATCATGGATaCCTTGAAGaCCTACTACATGATTGGGGAACAGAGTTTCTCagCgTTACCTTTGGGCCGTGAAG  
CCGTAGAAGCGGCCGTAAGGAGGCGGGGTACACCATTGAATGGTTCGAGGTTATTTACAGTCTTcAGCTCCACAATGGCAAATAACGAGGG  
CTTATTTTCGCTGGTTGCTCGCAAACTGAGTCGTCTCTTCTCGAGCACCACCACCACCACCACCTGA

MESGFTSKDYLHFNPRDYLEKYYKFGSRHSAESQILKHLKLNLFKIFCLDGVKGDLLIDIGSGPTIYQLLSACESFKEIVVTDYSDQNLQEL  
EKWLKKEPEAFDWSVVVTVYVCDLEGNRVKGPKEEKLQAVKQVVKCDVTSQSQLGAVPLPPADCVLSTLCLCAACPDLPTYCRALRNLGSLK  
PGGFLVIMDTLKNSSYYMIGEQKFSALPLGREAVEAAVKEAGYTIEWFEVISQSFSSSTMANNELFSLVARKLSRPLLEHHHHHH

>v10

ATGGAGAGTGGATTTACGAGTAAGGACACTTATTTGAGTCATTTTAAACCCGCGGACTACTTAGAAAAATACTACAAGTTTGAAGCCGCCATT  
CAGCAGAATCACAAATTTCTGAAACACCTTTTAAAGAACCTGTTTAAAAATCTTCTGTTTAGATGGGGTCAAAGGAGATTTGTTGATTGACATCGG  
ATCAGGTCCCACAATTTACCAACTTCTGTCCGCTTGTGAGAGTTTTAAGGAGATCGTCTGACGGACTATTAGATCAAAATCTGCAAGAAGCTG  
GAGAAATGGTTAAAGAAAGAACCAGAGGCGTTCGATTGGAGCCAGTTGTGACCTATGTCTGTGATCTTGAAGGAAACCCGCTAAAGGGTCTCG  
AAAAGGAGGAAAAGCTGCGCAAAGCCGTAAGCAAGTATTAAATGTGATGTTACTCAAAGCCAACCATTAGGAGCCGTCCTCCACTGCCCCCGGC  
GGATTGTGATTGTCAACCTTTGCTTgCACGAGCTTGTCTGACTTGCTTACATATTGTCTGTCATTACGCAACTTAGGAAGTTTGCCTAAA  
CCAGGAGGGTTTTCTGGTCATCATGGATaTgTTGAAGgCgTCCTACTACATGATTGGGGAACAGAAGTTCTCAcaTTTACCTTTGGGCCGTGAAG  
CCGTAGAAGCGGCCGTAAGGAGGCGGGGTACACCATTGAATGGTTCGAGGTTATTTACAGTCTACAGCTCCACAATGGCAAAATgCGAGGG  
CTTATTTTCGCTGGTGTCTCGCAAACCTGAGTCGTCCTCTTCTCGAGCACCACCACCACCACCTGA

MESGFTSKDITYLSHFNPRDYLEKYYKFGSRHSAESQILKHLKLNLFKIFCLDGVKGDLLIDIGSGPTIYQLLSACESFKEIVVTDYSDQNLQEL  
EKWLKKEPEAFDWSVVYVCDLEGNRVKGPKEEKLKQAVKQVLKCDVTQSQPLGAVPLPPADCVLSTLCLHAACPDLPTYCRALRNLGSLK  
PGGFLVIMDLKASYMIGEQQKFSHPLGREAVEAAVKEAGYTIWFVEVISQSYSSSTMANAELFLSLVARKLSRPLLEHHHHHH

>v11

ATGGAGAGTGGATTTACGAGTAAGGACACTTATTTGAGTCATTTTAAACCCGCGGACTACTTAGAAAAATACTACAAGTTTGAAGCCGCCATT  
CAGCAGAATCACAAATTTCTGAAACACCTTTTAAAGAACCTGTTTAAAAATCTTCTGTTTAGATGGGGTCAAAGGAGATTTGTTGATTGACATCGG  
ATCAGGTCCCACAATTTACCAACTTCTGTCCGCTTGTGAGAGTTTTAAGGAGATCGTCTGACGGACTATTAGATCAAAATCTGCAAGAAGCTG  
GAGAAATGGTTAAAGAAAGAACCAGAGGCGTTCGATTGGAGCCAGTTGTGACCTATGTCTGTGATCTTGAAGGAAACCCGCTAAAGGGTCTCG  
AAAAGGAGGAAAAGCTGCGCAAAGCCGTAAGCAAGTATTAAATGTGATGTTACTCAAAGCCAACCATTAGGAGCCGTCCTCCACTGCCCCCGGC  
GGATTGTGATTGTCAACCTTTGCTTgCGCAGCTTGTCTGACTTGCTTACATATTGTCTGTCATTACGCAACTTAGGAAGTTTGCCTAAA  
CCAGGAGGGTTTTCTGGTCATCATGGATcTgTTGAAGTgCCTTACTACATGATTGGGGAACAGAAGTTCTCAgCgTTACCTTTGGGCCGTGAAG  
CCGTAGAAGCGGCCGTAAGGAGGCGGGGTACACCATTGAATGGTTCGAGGTTATTTACAGTCTACAGCTCCACAATGGCAAAATgCGAGGG  
CTTATTTTCGCTGGTGTCTCGCAAACCTGAGTCGTCCTCTTCTCGAGCACCACCACCACCACCTGA

MESGFTSKDITYLSHFNPRDYLEKYYKFGSRHSAESQILKHLKLNLFKIFCLDGVKGDLLIDIGSGPTIYQLLSACESFKEIVVTDYSDQNLQEL  
EKWLKKEPEAFDWSVVYVCDLEGNRVKGPKEEKLKQAVKQVLKCDVTQSQPLGAVPLPPADCVLSTLCLCAACPDLPTYCRALRNLGSLK  
PGGFLVIMDLKASYMIGEQQKFSALPLGREAVEAAVKEAGYTIWFVEVISQSYSSSTMANAELFLSLVARKLSRPLLEHHHHHH

>v2

ATGGAGAGTGGATTTACGAGTAAGGACACTTATTTGAGTCATTTTAAACCCGCGGACTtCTTAGAAAAATACTACAAGTTTGAAGCCGCCATT  
CAGCAGAATCACAAATTTCTGAAACACCTTTTAAAGAACCTGTTTAAAAATCTTCTGTTTAGATGGGGTCAAAGGAGATTTGTTGATTGACATCGG  
ATCAGGTCCCACAATTTACCAACTTCTGTCCGCTTGTGAGAGTTTTAAGGAGATCGTCTGACGGACTATTAGATCAAAATCTGCAAGAAGCTG  
GAGAAATGGTTAAAGAAAGAACCAGAGGCGTTCGATTGGAGCCAGTTGTGACCTATGTCTGTGATCTTGAAGGAAACCCGCTAAAGGGTCTCG  
AAAAGGAGGAAAAGCTGCGCAAAGCCGTAAGCAAGTATTAAATGTGATGTTACTCAAAGCCAACCATTAGGAGCCGTCCTCCACTGCCCCCGGC  
GGATTGTGATTGTCAACCTTTGCTTgGACGAGCTTGTCTGACTTGCTTACATATTGTCTGTCATTACGCAACTTAGGAAGTTTGCCTAAA  
CCAGGAGGGTTTTCTGGTCATCATGGGgTaCCTTGAAGgCgTCTTACTACATGATTGGGGAACAGAAGTTCTCATCTTTACCTTTGGGCCGTGAAG  
CCGTAGAAGCGGCCGTAAGGAGGCGGGGTACACCATTGAATGGTTCGAGGTTATTTACAGTCTACAGCTCCACAATGGCAAAATACGAGGG  
CTTATTTTCGCTGGTGTCTCGCAAACCTGAGTCGTCCTCTTCTCGAGCACCACCACCACCACCTGA

MESGFTSKDITYLSHFNPRDFLEKYYKFGSRHSAESQILKHLKLNLFKIFCLDGVKGDLLIDIGSGPTIYQLLSACESFKEIVVTDYSDQNLQEL  
EKWLKKEPEAFDWSVVYVCDLEGNRVKGPKEEKLKQAVKQVLKCDVTQSQPLGAVPLPPADCVLSTLCLDAACPDLPTYCRALRNLGSLK  
PGGFLVIMDLKASYMIGEQQKFSPLGREAVEAAVKEAGYTIWFVEVISQSYSSSTMANNEGLFLSLVARKLSRPLLEHHHHHH

>v13

ATGGAGAGTGGATTTACGAGTAAGGACACTTATTTGAGTCATTTTAAACCCGCGGACTtCTTAGAAAAATACTACAAGTTTGAAGCCGCCATT  
CAGCAGAATCACAAATTTCTGAAACACCTTTTAAAGAACCTGTTTAAAAATCTTCTGTTTAGATGGGGTCAAAGGAGATTTGTTGATTGACATCGG  
ATCAGGTCCCACAATTTACCAACTTCTGTCCGCTTGTGAGAGTTTTAAGGAGATCGTCTGACGGACTATTAGATCAAAATCTGCAAGAAGCTG  
GAGAAATGGTTAAAGAAAGAACCAGAGGCGTTCGATTGGAGCCAGTTGTGACCTATGTCTGTGATCTTGAAGGAAACCCGCTAAAGGGTCTCG  
AAAAGGAGGAAAAGCTGCGCAAAGCCGTAAGCAAGTATTAAATGTGATGTTACTCAAAGCCAACCATTAGGAGCCGTCCTCCACTGCCCCCGGC  
GGATTGTGATTGTCAACCTTTGCTTgCACGAGCTTGTCTGACTTGCTTACATATTGTCTGTCATTACGCAACTTAGGAAGTTTGCCTAAA  
CCAGGAGGGTTTTCTGGTCATCATGGATGcCCTTGAAGgCgTCTTACTACATGATTGGGGAACAGAAGTTCTCATCTTTACCTTTGGGCCGTGAAG  
CCGTAGAAGCGGCCGTAAGGAGGCGGGGTACACCATTGAATGGTTCGAGGTTATTTACAGTCTACAGCTCCACAATGGCAAAATcCGAGGG  
CTTATTTTCGCTGGTGTCTCGCAAACCTGAGTCGTCCTCTTCTCGAGCACCACCACCACCACCTGA

MESGFTSKDITYLSHFNPRDFLEKYYKFGSRHSAESQILKHLKLNLFKIFCLDGVKGDLLIDIGSGPTIYQLLSACESFKEIVVTDYSDQNLQEL  
EKWLKKEPEAFDWSVVYVCDLEGNRVKGPKEEKLKQAVKQVLKCDVTQSQPLGAVPLPPADCVLSTLCLHAACPDLPTYCRALRNLGSLK  
PGGFLVIMDLKQSYMIGEQQKFSPLGREAVEAAVKEAGYTIWFVEVISQSYSSSTMANSEGLFLSLVARKLSRPLLEHHHHHH

>v14

ATGGAGAGTGGATTTACGAGTAAGGACACTTATTTGAGTCATTTTAAACCCGCGGACTtCTTAGAAAAATACTACAAGTTTGAAGCCGCCATT  
CAGCAGAATCACAAATTTCTGAAACACCTTTTAAAGAACCTGTTTAAAAATCTTCTGTTTAGATGGGGTCAAAGGAGATTTGTTGATTGACATCGG  
ATCAGGTCCCACAATTTACCAACTTCTGTCCGCTTGTGAGAGTTTTAAGGAGATCGTCTGACGGACTATTAGATCAAAATCTGCAAGAAGCTG  
GAGAAATGGTTAAAGAAAGAACCAGAGGCGTTCGATTGGAGCCAGTTGTGACCTATGTCTGTGATCTTGAAGGAAACCCGCTAAAGGGTCTCG  
AAAAGGAGGAAAAGCTGCGCAAAGCCGTAAGCAAGTATTAAATGTGATGTTACTCAAAGCCAACCATTAGGAGCCGTCCTCCACTGCCCCCGGC  
GGATTGTGATTGTCAACCTTTGCTTgCACGAGCTTGTCTGACTTGCTTACATATTGTCTGTCATTACGCAACTTAGGAAGTTTGCCTAAA  
CCAGGAGGGTTTTCTGGTCATCATGGATcTgTTGAAGgCgTCTTACTACATGATTGGGGAACAGAAGTTCTCAgCgTTACCTTTGGGCCGTGAAG  
CCGTAGAAGCGGCCGTAAGGAGGCGGGGTACACCATTGAATGGTTCGAGGTTATTTACAGTCTACAGCTCCACAATGGCAAAATcCGAGGG  
CTTATTTTCGCTGGTGTCTCGCAAACCTGAGTCGTCCTCTTCTCGAGCACCACCACCACCACCTGA

MESGFTSKDITYLSHFNPRDFLEKYYKFGSRHSAESQILKHLKLNLFKIFCLDGVKGDLLIDIGSGPTIYQLLSACESFKEIVVTDYSDQNLQEL  
EKWLKKEPEAFDWSVVYVCDLEGNRVKGPKEEKLKQAVKQVLKCDVTQSQPLGAVPLPPADCVLSTLCLHAACPDLPTYCRALRNLGSLK  
PGGFLVIMDLKASYMIGEQQKFSALPLGREAVEAAVKEAGYTIWFVEVISQSYSSSTMANNEGLFLSLVARKLSRPLLEHHHHHH

>v15

ATGGAGAGTGGATTTACGAGTAAGGACACTTATTTGAGTCATTTTAAACCCGCGGACTACTTAGAAAAATACTACAAGTTTGAAGCCGCCATT  
CAGCAGAATCACAAATTTCTGAAACACCTTTTAAAGAACCTGTTTAAAAATCTTCTGTTTAGATGGGGTCAAAGGAGATTTGTTGATTGACATCGG  
ATCAGGTCCCACAATTTACCAACTTCTGTCCGCTTGTGAGAGTTTTAAGGAGATCGTCTGACGGACTATTAGATCAAAATCTGCAAGAAGCTG  
GAGAAATGGTTAAAGAAAGAACCAGAGGCGTTCGATTGGAGCCAGTTGTGACCTATGTCTGTGATCTTGAAGGAAACCCGCTAAAGGGTCTCG  
AAAAGGAGGAAAAGCTGCGCAAGCCGTAAGCAAGTATTAAATGTGATGTTACTCAAAGCCAACCATTAGGAGCCGTCCTCCACTGCCCCCGGC  
GGATTGTGATTGTCAACCCCTTGTCTTgCAGCAGCTTGTCTGACTTGCTACATATTGTCTGTCATTACGCAACTTAGGAAGTTTGCCTAAA  
CCAGGAGGGTTTTCTGGTCATCATGGATGCCTTGAAGaCtCTACTACATGATTGGGGAACAGAAGTTCTCAcaTTTACCTTTGGGCCGTGAAG  
CCGTAGAAGCGGCCGTAAGGAGGCGGGGTACACCATTGAATGGTTCGAGGTTATTTACAGTCTTcAGCTCCACAATGGCAAATtCCGAGGG  
CTTATTTTCGCTGGTGTCTCGCAAACTGAGTCGTCCTCTTCTCGAGCACCACCACCACCACCTGA

MESGFTSKDITYLSHFNPRDYLEKYYKFGSRHSAESQILKHLKLNLFKIFCLDGVKGDLLIDIGSGPTIYQLLSACESFKEIVVTDYSDQNLQEL  
EKWLKKEPEAFDWSPVVTVYVCDLEGNRVKGPKEEKLKQAVKQVLKCDVTQSQPLGAVPLPPADCVLSTLCLHAACPDLPTYCRALRNLGSLK  
PGGFLVIMDALKTSYYMIGEQQFSLPLGREAVEAAVKEAGYTIWFVEVISQSFSTMANSEGLFSLVARKLSRPLLEHHHHHH

>v16

ATGGAGAGTGGATTTACGAGTAAGGACACTTATTTGAGTCATTTTAAACCCGCGGACTACTTAGAAAAATACTACAAGTTTGAAGCCGCCATT  
CAGCAGAATCACAAATTTCTGAAACACCTTTTAAAGAACCTGTTTAAAAATCTTCTGTTTAGATGGGGTCAAAGGAGATTTGTTGATTGACATCGG  
ATCAGGTCCCACAATTTACCAACTTCTGTCCGCTTGTGAGAGTTTTAAGGAGATCGTCTGACGGACTATTAGATCAAAATCTGCAAGAAGCTG  
GAGAAATGGTTAAAGAAAGAACCAGAGGCGTTCGATTGGAGCCAGTTGTGACCTATGTCTGTGATCTTGAAGGAAACCCGCTAAAGGGTCTCG  
AAAAGGAGGAAAAGCTGCGCAAGCCGTAAGCAAGTATTAAATGTGATGTTACTCAAAGCCAACCATTAGGAGCCGTCCTCCACTGCCCCCGGC  
GGATTGTGATTGTCAACCCCTTGTCTTgCAGCAGCTTGTCTGACTTGCTACATATTGTCTGTCATTACGCAACTTAGGAAGTTTGCCTAAA  
CCAGGAGGGTTTTCTGGTCATCATGGATGCCTTGAAGaCtCTACTACATGATTGGGGAACAGAAGTTCTCAgCgTTTACCTTTGGGCCGTGAAG  
CCGTAGAAGCGGCCGTAAGGAGGCGGGGTACACCATTGAATGGTTCGAGGTTATTTACAGTCTTACAGCTCCACAATGatgAATgcCGAGGG  
CTTATTTTCGCTGGTGTCTCGCAAACTGAGTCGTCCTCTTCTCGAGCACCACCACCACCACCTGA

MESGFTSKDITYLSHFNPRDYLEKYYKFGSRHSAESQILKHLKLNLFKIFCLDGVKGDLLIDIGSGPTIYQLLSACESFKEIVVTDYSDQNLQEL  
EKWLKKEPEAFDWSPVVTVYVCDLEGNRVKGPKEEKLKQAVKQVLKCDVTQSQPLGAVPLPPADCVLSTLCLHAACPDLPTYCRALRNLGSLK  
PGGFLVIMDALKNSYYMIGEQQFSALPLGREAVEAAVKEAGYTIWFVEVISQSYSSTMMNAEGLFSLVARKLSRPLLEHHHHHH

>v17

ATGGAGAGTGGATTTACGAGTAAGGACACTTATTTGAGTCATTTTAAACCCGCGGACTACTTAGAAAAATACTACAAGTTTGAAGCCGCCATT  
CAGCAGAATCACAAATTTCTGAAACACCTTTTAAAGAACCTGTTTAAAAATCTTCTGTTTAGATGGGGTCAAAGGAGATTTGTTGATTGACATCGG  
ATCAGGTCCCACAATTTACCAACTTCTGTCCGCTTGTGAGAGTTTTAAGGAGATCGTCTGACGGACTATTAGATCAAAATCTGCAAGAAGCTG  
GAGAAATGGTTAAAGAAAGAACCAGAGGCGTTCGATTGGAGCCAGTTGTGACCTATGTCTGTGATCTTGAAGGAAACCCGCTAAAGGGTCTCG  
AAAAGGAGGAAAAGCTGCGCAAGCCGTAAGCAAGTATTAAATGTGATGTTACTCAAAGCCAACCATTAGGAGCCGTCCTCCACTGCCCCCGGC  
GGATTGTGATTGTCAACCCCTTGTCTTgCAGCAGCTTGTCTGACTTGCTACATATTGTCTGTCATTACGCAACTTAGGAAGTTTGCCTAAA  
CCAGGAGGGTTTTCTGGTCATCATGGATaCCTTGAAGcagTCTACTACATGATTGGGGAACAGAAGTTCTCAgCgTTTACCTTTGGGCCGTGAAG  
CCGTAGAAGCGGCCGTAAGGAGGCGGGGTACACCATTGAATGGTTCGAGGTTATTTACAGTCTTACAGCTCCACAATGagcAATAACGAGGG  
CTTATTTTCGCTGGTGTCTCGCAAACTGAGTCGTCCTCTTCTCGAGCACCACCACCACCACCTGA

MESGFTSKDITYLSHFNPRDYLEKYYKFGSRHSAESQILKHLKLNLFKIFCLDGVKGDLLIDIGSGPTIYQLLSACESFKEIVVTDYSDQNLQEL  
EKWLKKEPEAFDWSPVVTVYVCDLEGNRVKGPKEEKLKQAVKQVLKCDVTQSQPLGAVPLPPADCVLSTLCLCAACPDLPTYCRALRNLGSLK  
PGGFLVIMDTLQSYMIGEQQFSALPLGREAVEAAVKEAGYTIWFVEVISQSYSSTMSNNEGLFSLVARKLSRPLLEHHHHHH

>v18

ATGGAGAGTGGATTTACGAGTAAGGACACTTATTTGAGTCATTTTAAACCCGCGGACTACTTAGAAAAATACTACAAGTTTGAAGCCGCCATT  
CAGCAGAATCACAAATTTCTGAAACACCTTTTAAAGAACCTGTTTAAAAATCTTCTGTTTAGATGGGGTCAAAGGAGATTTGTTGATTGACATCGG  
ATCAGGTCCCACAATTTACCAACTTCTGTCCGCTTGTGAGAGTTTTAAGGAGATCGTCTGACGGACTATTAGATCAAAATCTGCAAGAAGCTG  
GAGAAATGGTTAAAGAAAGAACCAGAGGCGTTCGATTGGAGCCAGTTGTGACCTATGTCTGTGATCTTGAAGGAAACCCGCTAAAGGGTCTCG  
AAAAGGAGGAAAAGCTGCGCAAGCCGTAAGCAAGTATTAAATGTGATGTTACTCAAAGCCAACCATTAGGAGCCGTCCTCCACTGCCCCCGGC  
GGATTGTGATTGTCAACCCCTTGTCTTgCAGCAGCTTGTCTGACTTGCTACATATTGTCTGTCATTACGCAACTTAGGAAGTTTGCCTAAA  
CCAGGAGGGTTTTCTGGTCATCATGGATGCCTTGAAGcgtTCTACTACATGATTGGGGAACAGAAGTTCTCATCTTTACCTTTGGGCCGTGAAG  
CCGTAGAAGCGGCCGTAAGGAGGCGGGGTACACCATTGAATGGTTCGAGGTTATTTACAGTCTTgAGCTCCACAATGGCAAATgcCGAGGG  
CTTATTTTCGCTGGTGTCTCGCAAACTGAGTCGTCCTCTTCTCGAGCACCACCACCACCACCTGA

MESGFTSKDITYLSHFNPRDYLEKYYKFGSRHSAESQILKHLKLNLFKIFCLDGVKGDLLIDIGSGPTIYQLLSACESFKEIVVTDYSDQNLQEL  
EKWLKKEPEAFDWSPVVTVYVCDLEGNRVKGPKEEKLKQAVKQVLKCDVTQSQPLGAVPLPPADCVLSTLCLCAACPDLPTYCRALRNLGSLK  
PGGFLVIMDALKRSYYMIGEQQFSSPLPLGREAVEAAVKEAGYTIWFVEVISQSWSTMANEGLFSLVARKLSRPLLEHHHHHH

>v19

ATGGAGAGTGGATTTACGAGTAAGGACACTTATTTGAGTCATTTTAAACCCGCGGACTACTTAGAAAAATACTACAAGTTTGAAGCCGCCATT  
CAGCAGAATCACAAATTTCTGAAACACCTTTTAAAGAACCTGTTTAAAAATCTTCTGTTTAGATGGGGTCAAAGGAGATTTGTTGATTGACATCGG  
ATCAGGTCCCACAATTTACCAACTTCTGTCCGCTTGTGAGAGTTTTAAGGAGATCGTCTGACGGACTATTAGATCAAAATCTGCAAGAAGCTG  
GAGAAATGGTTAAAGAAAGAACCAGAGGCGTTCGATTGGAGCCAGTTGTGACCTATGTCTGTGATCTTGAAGGAAACCCGCTAAAGGGTCTCG  
AAAAGGAGGAAAAGCTGCGCAAGCCGTAAGCAAGTATTAAATGTGATGTTACTCAAAGCCAACCATTAGGAGCCGTCCTCCACTGCCCCCGGC  
GGATTGTGATTGTCAACCCCTTGTCTTgCAGCAGCTTGTCTGACTTGCTACATATTGTCTGTCATTACGCAACTTAGGAAGTTTGCCTAAA  
CCAGGAGGGTTTTCTGGTCATCATGGATGCCTTGAAGcagTCTACTACATGATTGGGGAACAGAAGTTCTCATCTTTACCTTTGGGCCGTGAAG  
CCGTAGAAGCGGCCGTAAGGAGGCGGGGTACACCATTGAATGGTTCGAGGTTATTTACAGTCTTgAGCTCCACAATGGCAAATgcCGAGGG  
CTTATTTTCGCTGGTGTCTCGCAAACTGAGTCGTCCTCTTCTCGAGCACCACCACCACCACCTGA

MESGFTSKDITYLSHFNPRDYLEKYYKFGSRHSAESQILKHLKLNLFKIFCLDGVKGDLLIDIGSGPTIYQLLSACESFKEIVVTDYSDQNLQEL  
EKWLKKEPEAFDWSPVVTVYVCDLEGNRVKGPKEEKLKQAVKQVLKCDVTQSQPLGAVPLPPADCVLSTLCLHAACPDLPTYCRALRNLGSLK  
PGGFLVIMDALKQSYMIGEQQFSSPLPLGREAVEAAVKEAGYTIWFVEVISQSWSTMANEGLFSLVARKLSRPLLEHHHHHH

>v20

ATGGAGAGTGGATTTACGAGTAAGGACACTTATTTGAGTCATTTTAAACCCGCGGACTACTTAGAAAAATACTACAAGTTTGAAGCCGCCATT  
CAGCAGAATCACAAATTTCTGAAACACCTTTTAAAGAACCTGTTTAAAAATCTTCTGTTTAGATGGGGTCAAAGGAGATTTGTTGATTGACATCGG  
ATCAGGTCCCACAATTTACCAACTTCTGTCCGCTTGTGAGAGTTTTAAGGAGATCGTCTGTGACGGACTATTAGATCAAAATCTGCAAGAAGCTG  
GAGAAATGGTTAAAGAAAGAACCAGAGGCGTTCGATTGGAGCCAGTTGTGACCTATGTCTGTGATCTTGAAGGAAACCCGCTAAAGGGTCTCTG  
AAAAGGAGGAAAAGCTGCGCAAAGCCGTAAAGCAAGTATTAAATGTGATGTTACTCAAAGCCAACCATTAGGAGCCGTCCTCCACTGCCCCCGGC  
GGATTGTGATTGTCAACCCCTTGTCTTGGACGAGCTTGTCTGACTTGCCTACATATTGTCTGTGATCTTGAAGGAAACCCGCTAAAGGGTCTCTG  
CCAGGAGGGTTTTCTGGTCATCATGGgTatgTTGAAGgCgTCCTACTACATGATTGGGGAAACAGAAGTTCTCATCTTTACCTTTGGGCCGTGAAG  
CCGTAGAAGCGGCCGTAAGGAGGCGGGGTACACCATTGAATGGTTCGAGGTTATTTACAGTCTCTCAGCTCCACAATGGCAAATgCAGAGGG  
CTTATTTTCGCTGGTGTCTCGCAAACCTGAGTCGTCCTCTTCTCGAGCACCACCACCACCACCTGA

MESGFTSKDITYLSHFNPRDYLEKYYKFGSRHSAESQILKHLKLNLFKIFCLDGVKGDLLIDIGSGPTIYQLLSACESFKEIVVTDYSDQNLQEL  
EKWLKKEPEAFDWSPVVTVYVCDLEGNRVKGPKEEKLKQAVKQVLKCDVTQSQPLGAVPLPPADCVLSTLCLDAACPDLPTYCRALRNLGSLK  
PGGFLVIMGLKASYMIGEYKQFSSLPGLREAVEAAVKEAGYTIWFVEVSIQSFSSTMANAEGFLSLVARKLSRPLLEHHHHHH

>v21

ATGGAGAGTGGATTTACGAGTAAGGACACTTATTTGAGTCATTTTAAACCCGCGGACTACTTAGAAAAATtCTACAAGTTTGAAGCCGCCATT  
CAGCAGAATCACAAATTTCTGAAACACCTTTTAAAGAACCTGTTTAAAAATCTTCTGTTTAGATGGGGTCAAAGGAGATTTGTTGATTGACATCGG  
ATCAGGTCCCACAATTTACCAACTTCTGTCCGCTTGTGAGAGTTTTAAGGAGATCGTCTGTGACGGACTATTAGATCAAAATCTGCAAGAAGCTG  
GAGAAATGGTTAAAGAAAGAACCAGAGGCGTTCGATTGGAGCCAGTTGTGACCTATGTCTGTGATCTTGAAGGAAACCCGCTAAAGGGTCTCTG  
AAAAGGAGGAAAAGCTGCGCAAAGCCGTAAAGCAAGTATTAAATGTGATGTTACTCAAAGCCAACCATTAGGAGCCGTCCTCCACTGCCCCCGGC  
GGATTGTGATTGTCAACCCCTTGTCTTGGACGAGCTTGTCTGACTTGCCTACATATTGTCTGTGATCTTGAAGGAAACCCGCTAAAGGGTCTCTG  
CCAGGAGGGTTTTCTGGTCATCATGGgTatgTTGAAGgCgTCCTACTACATGATTGGGGAAACAGAAGTTCTCAgCgTTACCTTTGGGCCGTGAAG  
CCGTAGAAGCGGCCGTAAGGAGGCGGGGTACACCATTGAATGGTTCGAGGTTATTTACAGTCTTACAGCTCCACAATGGCAAATgCAGAGGG  
CTTATTTTCGCTGGTGTCTCGCAAACCTGAGTCGTCCTCTTCTCGAGCACCACCACCACCACCTGA

MESGFTSKDITYLSHFNPRDYLEKYYKFGSRHSAESQILKHLKLNLFKIFCLDGVKGDLLIDIGSGPTIYQLLSACESFKEIVVTDYSDQNLQEL  
EKWLKKEPEAFDWSPVVTVYVCDLEGNRVKGPKEEKLKQAVKQVLKCDVTQSQPLGAVPLPPADCVLSTLCLHAACPDLPTYCRALRNLGSLK  
PGGFLVIMDALKESYYMIGEYKFSALPLGREAVEAAVKEAGYTIWFVEVSIQSYSSSTMANAEGFLSLVARKLSRPLLEHHHHHH

>v22

ATGGAGAGTGGATTTACGAGTAAGGACACTTATTTGAGTCATTTTAAACCCGCGGACTACTTAGAAAAATACTACAAGTTTGAAGCCGCCATT  
CAGCAGAATCACAAATTTCTGAAACACCTTTTAAAGAACCTGTTTAAAAATCTTCTGTTTAGATGGGGTCAAAGGAGATTTGTTGATTGACATCGG  
ATCAGGTCCCACAATTTACCAACTTCTGTCCGCTTGTGAGAGTTTTAAGGAGATCGTCTGTGACGGACTATTAGATCAAAATCTGCAAGAAGCTG  
GAGAAATGGTTAAAGAAAGAACCAGAGGCGTTCGATTGGAGCCAGTTGTGACCTATGTCTGTGATCTTGAAGGAAACCCGCTAAAGGGTCTCTG  
AAAAGGAGGAAAAGCTGCGCAAAGCCGTAAAGCAAGTATTAAATGTGATGTTACTCAAAGCCAACCATTAGGAGCCGTCCTCCACTGCCCCCGGC  
GGATTGTGATTGTCAACCCCTTGTCTTGGACGAGCTTGTCTGACTTGCCTACATATTGTCTGTGATCTTGAAGGAAACCCGCTAAAGGGTCTCTG  
CCAGGAGGGTTTTCTGGTCATCATGGgTatgTTGAAGgCgTCCTACTACATGATTGGGGAAACAGAAGTTCTCAcaTTACCTTTGGGCCGTGAAG  
CCGTAGAAGCGGCCGTAAGGAGGCGGGGTACACCATTGAATGGTTCGAGGTTATTTACAGTCTTACAGCTCCACAATGatgAATgCAGAGGG  
CTTATTTTCGCTGGTGTCTCGCAAACCTGAGTCGTCCTCTTCTCGAGCACCACCACCACCACCTGA

MESGFTSKDITYLSHFNPRDYLEKYYKFGSRHSAESQILKHLKLNLFKIFCLDGVKGDLLIDIGSGPTIYQLLSACESFKEIVVTDYSDQNLQEL  
EKWLKKEPEAFDWSPVVTVYVCDLEGNRVKGPKEEKLKQAVKQVLKCDVTQSQPLGAVPLPPADCVLSTLCLHAACPDLPTYCRALRNLGSLK  
PGGFLVIMDALKASYMIGEYKFSALPLGREAVEAAVKEAGYTIWFVEVSIQSYSSSTMNCEGLFLSLVARKLSRPLLEHHHHHH

>v23

ATGGAGAGTGGATTTACGAGTAAGGACACTTATTTGAGTCATTTTAAACCCGCGGACTACTTAGAAAAATACTACAAGTTTGAAGCCGCCATT  
CAGCAGAATCACAAATTTCTGAAACACCTTTTAAAGAACCTGTTTAAAAATCTTCTGTTTAGATGGGGTCAAAGGAGATTTGTTGATTGACATCGG  
ATCAGGTCCCACAATTTACCAACTTCTGTCCGCTTGTGAGAGTTTTAAGGAGATCGTCTGTGACGGACTATTAGATCAAAATCTGCAAGAAGCTG  
GAGAAATGGTTAAAGAAAGAACCAGAGGCGTTCGATTGGAGCCAGTTGTGACCTATGTCTGTGATCTTGAAGGAAACCCGCTAAAGGGTCTCTG  
AAAAGGAGGAAAAGCTGCGCAAAGCCGTAAAGCAAGTATTAAATGTGATGTTACTCAAAGCCAACCATTAGGAGCCGTCCTCCACTGCCCCCGGC  
GGATTGTGATTGTCAACCCCTTGTCTTGGACGAGCTTGTCTGACTTGCCTACATATTGTCTGTGATCTTGAAGGAAACCCGCTAAAGGGTCTCTG  
CCAGGAGGGTTTTCTGGTCATCATGGgTatgTTGAAGTATCTTACTACATGATTGGGGAAACAGAAGTTCTCAgCgTTACCTTTGGGCCGTGAAG  
CCGTAGAAGCGGCCGTAAGGAGGCGGGGTACACCATTGAATGGTTCGAGGTTATTTACAGTCTTACAGCTCCACAATGatgAATgCAGAGGG  
CTTATTTTCGCTGGTGTCTCGCAAACCTGAGTCGTCCTCTTCTCGAGCACCACCACCACCACCTGA

MESGFTSKDITYLSHFNPRDYLEKYYKFGSRHSAESQILKHLKLNLFKIFCLDGVKGDLLIDIGSGPTIYQLLSACESFKEIVVTDYSDQNLQEL  
EKWLKKEPEAFDWSPVVTVYVCDLEGNRVKGPKEEKLKQAVKQVLKCDVTQSQPLGAVPLPPADCVLSTLCLDAACPDLPTYCRALRNLGSLK  
PGGFLVIMGLTKSSYYMIGEYKFSALPLGREAVEAAVKEAGYTIWFVEVSIQSWSSSTMANAEGFLSLVARKLSRPLLEHHHHHH

>v24

ATGGAGAGTGGATTTACGAGTAAGGACACTTATTTGAGTCATTTTAAACCCGCGGACTACTTAGAAAAATtCTACAAGTTTGAAGCCGCCATT  
CAGCAGAATCACAAATTTCTGAAACACCTTTTAAAGAACCTGTTTAAAAATCTTCTGTTTAGATGGGGTCAAAGGAGATTTGTTGATTGACATCGG  
ATCAGGTCCCACAATTTACCAACTTCTGTCCGCTTGTGAGAGTTTTAAGGAGATCGTCTGTGACGGACTATTAGATCAAAATCTGCAAGAAGCTG  
GAGAAATGGTTAAAGAAAGAACCAGAGGCGTTCGATTGGAGCCAGTTGTGACCTATGTCTGTGATCTTGAAGGAAACCCGCTAAAGGGTCTCTG  
AAAAGGAGGAAAAGCTGCGCAAAGCCGTAAAGCAAGTATTAAATGTGATGTTACTCAAAGCCAACCATTAGGAGCCGTCCTCCACTGCCCCCGGC  
GGATTGTGATTGTCAACCCCTTGTCTTGGACGAGCTTGTCTGACTTGCCTACATATTGTCTGTGATCTTGAAGGAAACCCGCTAAAGGGTCTCTG  
CCAGGAGGGTTTTCTGGTCATCATGGgTatgTTGAAGTATCTTACTACATGATTGGGGAAACAGAAGTTCTCAgCgTTACCTTTGGGCCGTGAAG  
CCGTAGAAGCGGCCGTAAGGAGGCGGGGTACACCATTGAATGGTTCGAGGTTATTTACAGTCTTACAGCTCCACAATGGCAAATgCAGAGGG  
CTTATTTTCGCTGGTGTCTCGCAAACCTGAGTCGTCCTCTTCTCGAGCACCACCACCACCACCTGA

MESGFTSKDITYLSHFNPRDYLEKYYKFGSRHSAESQILKHLKLNLFKIFCLDGVKGDLLIDIGSGPTIYQLLSACESFKEIVVTDYSDQNLQEL  
EKWLKKEPEAFDWSPVVTVYVCDLEGNRVKGPKEEKLKQAVKQVLKCDVTQSQPLGAVPLPPADCVLSTLCLHAACPDLPTYCRALRNLGSLK  
PGGFLVIMDALKQSYMIGEYKFSALPLGREAVEAAVKEAGYTIWFVEVSIQSFSSTMANNEGLFLSLVARKLSRPLLEHHHHHH

>v25

ATGGAGAGTGGATTTACGAGTAAGGACACTTATTTGAGTCATTTTAAACCCGCGGACTACTTAGAAAAAActACAAGTTTGAAGCCGCCATT  
CAGCAGAATCACAAATTTCTGAAACACCTTTTAAAGAACCTGTTTAAAACTTCTGTTTAGATGGGGTCAAAGGAGATTTGTTGATTGACATCGG  
ATCAGGTCCCACAATTTACCAACTTCTGTCCGCTTGTGAGAGTTTAAAGGAGATCGTCTGACGGACTATTAGATCAAAATCTGCAAGAAGCTG  
GAGAAATGGTTAAAGAAAGAACCAGAGGCGTTCGATTGGAGCCAGTTGTGACCTATGTCTGTGATCTTGAAGGAAACCCGCTAAAGGGTCTCG  
AAAAGGAGGAAAAGCTGCGCAAAGCCGTAAGCAAGTATTAAATGTGATGTTACTCAAAGCCAACCATTAGGAGCCGTCCTCCACTGCCCCCGGC  
GGATTGTGATTGTCAACCTTTGCTTgCAGCAGCTTGTCTGACTTGCCCTACATATTGTCTGTCATTACGCAACTTAGGAAGTTGCTTAAA  
CCAGGAGGGTTTCTGGTCATCATGGATatgTTGAAGTCATCTACTACATGATTGGGGAAACAGAAGTTCTCAgCgTTACCTTTGGGCCGTGAAG  
CCGTAGAAGCGGCCGTAAGGAGGCGGGGTACACCATTGAATGGTTCGAGGTTATTTACAGTCTTACAGCTCCACAATGGCAAATAACGAGGG  
CTTATTTTCGCTGGTGTCTCGCAAACCTGAGTCGTCCTCTTCTCGAGCACCACCACCACCACCTGA

MESGFTSKDYLHFNPRDYLEKFKYKFSRHSAESQILKHLKLNLFKIFCLDGVKGDLLIDIGSGPTIYQLLSACESFKEIVVTDYSDQNLQEL  
EKWLKKEPEAFDWSPVVTVYVCDLEGNRVKGPKEEKLKQAVKQVLKCDVTQSQPLGAVPLPPADCVLSTLCLHAACPDLPTYCRALRNLGSLK  
PGGFLVIMDLKSSYYMIGEOKFSALPLGREAVEAAVKEAGYTIWFVEVISQSYSSSTMANNEGLFSLVARKLSRPLLEHHHHHH

>v26

ATGGAGAGTGGATTTACGAGTAAGGACACTTATTTGAGTCATTTTAAACCCGCGGACTACTTAGAAAAAActACAAGTTTGAAGCCGCCATT  
CAGCAGAATCACAAATTTCTGAAACACCTTTTAAAGAACCTGTTTAAAACTTCTGTTTAGATGGGGTCAAAGGAGATTTGTTGATTGACATCGG  
ATCAGGTCCCACAATTTACCAACTTCTGTCCGCTTGTGAGAGTTTAAAGGAGATCGTCTGACGGACTATTAGATCAAAATCTGCAAGAAGCTG  
GAGAAATGGTTAAAGAAAGAACCAGAGGCGTTCGATTGGAGCCAGTTGTGACCTATGTCTGTGATCTTGAAGGAAACCCGCTAAAGGGTCTCG  
AAAAGGAGGAAAAGCTGCGCAAAGCCGTAAGCAAGTATTAAATGTGATGTTACTCAAAGCCAACCATTAGGAGCCGTCCTCCACTGCCCCCGGC  
GGATTGTGATTGTCAACCTTTGCTTgCAGCAGCTTGTCTGACTTGCCCTACATATTGTCTGTCATTACGCAACTTAGGAAGTTGCTTAAA  
CCAGGAGGGTTTCTGGTCATCATGGATaCCTTGAAGCaCTTGAAGCaCTTGAAGCaCTTGAAGCaCTTGAAGCaCTTGAAGCaCTTGAAGCaCTTGAAG  
CCGTAGAAGCGGCCGTAAGGAGGCGGGGTACACCATTGAATGGTTCGAGGTTATTTACAGTCTTACAGCTCCACAATGGCAAATAACGAGGG  
CTTATTTTCGCTGGTGTCTCGCAAACCTGAGTCGTCCTCTTCTCGAGCACCACCACCACCACCACCTGA

MESGFTSKDYLHFNPRDYLEKFKYKFSRHSAESQILKHLKLNLFKIFCLDGVKGDLLIDIGSGPTIYQLLSACESFKEIVVTDYSDQNLQEL  
EKWLKKEPEAFDWSPVVTVYVCDLEGNRVKGPKEEKLKQAVKQVLKCDVTQSQPLGAVPLPPADCVLSTLCLHAACPDLPTYCRALRNLGSLK  
PGGFLVIMDLKSSYYMIGEOKFSALPLGREAVEAAVKEAGYTIWFVEVISQSYSSSTMANNEGLFSLVARKLSRPLLEHHHHHH

>v27

ATGGAGAGTGGATTTACGAGTAAGGACACTTATTTGAGTCATTTTAAACCCGCGGACTACTTAGAAAAAActACAAGTTTGAAGCCGCCATT  
CAGCAGAATCACAAATTTCTGAAACACCTTTTAAAGAACCTGTTTAAAACTTCTGTTTAGATGGGGTCAAAGGAGATTTGTTGATTGACATCGG  
ATCAGGTCCCACAATTTACCAACTTCTGTCCGCTTGTGAGAGTTTAAAGGAGATCGTCTGACGGACTATTAGATCAAAATCTGCAAGAAGCTG  
GAGAAATGGTTAAAGAAAGAACCAGAGGCGTTCGATTGGAGCCAGTTGTGACCTATGTCTGTGATCTTGAAGGAAACCCGCTAAAGGGTCTCG  
AAAAGGAGGAAAAGCTGCGCAAAGCCGTAAGCAAGTATTAAATGTGATGTTACTCAAAGCCAACCATTAGGAGCCGTCCTCCACTGCCCCCGGC  
GGATTGTGATTGTCAACCTTTGCTTgCGCAGCTTGTCTGACTTGCCCTACATATTGTCTGTCATTACGCAACTTAGGAAGTTGCTTAAA  
CCAGGAGGGTTTCTGGTCATCATGGATcCCTTGAAGTCATCTACTACATGATTGGGGAAACAGAAGTTCTCAgCgTTACCTTTGGGCCGTGAAG  
CCGTAGAAGCGGCCGTAAGGAGGCGGGGTACACCATTGAATGGTTCGAGGTTATTTACAGTCTTgAGCTCCACAATGGCAAATgCAGAGGG  
CTTATTTTCGCTGGTGTCTCGCAAACCTGAGTCGTCCTCTTCTCGAGCACCACCACCACCACCACCTGA

MESGFTSKDYLHFNPRDYLEKFKYKFSRHSAESQILKHLKLNLFKIFCLDGVKGDLLIDIGSGPTIYQLLSACESFKEIVVTDYSDQNLQEL  
EKWLKKEPEAFDWSPVVTVYVCDLEGNRVKGPKEEKLKQAVKQVLKCDVTQSQPLGAVPLPPADCVLSTLCLCAACPDLPTYCRALRNLGSLK  
PGGFLVIMDSLKSSYYMIGEOKFSALPLGREAVEAAVKEAGYTIWFVEVISQSWSSSTMANAEGFLSLVARKLSRPLLEHHHHHH

>v28

ATGGAGAGTGGATTTACGAGTAAGGACACTTATTTGAGTCATTTTAAACCCGCGGACTACTTAGAAAAAActACAAGTTTGAAGCCGCCATT  
CAGCAGAATCACAAATTTCTGAAACACCTTTTAAAGAACCTGTTTAAAACTTCTGTTTAGATGGGGTCAAAGGAGATTTGTTGATTGACATCGG  
ATCAGGTCCCACAATTTACCAACTTCTGTCCGCTTGTGAGAGTTTAAAGGAGATCGTCTGACGGACTATTAGATCAAAATCTGCAAGAAGCTG  
GAGAAATGGTTAAAGAAAGAACCAGAGGCGTTCGATTGGAGCCAGTTGTGACCTATGTCTGTGATCTTGAAGGAAACCCGCTAAAGGGTCTCG  
AAAAGGAGGAAAAGCTGCGCAAAGCCGTAAGCAAGTATTAAATGTGATGTTACTCAAAGCCAACCATTAGGAGCCGTCCTCCACTGCCCCCGGC  
GGATTGTGATTGTCAACCTTTGCTTgCAGCAGCTTGTCTGACTTGCCCTACATATTGTCTGTCATTACGCAACTTAGGAAGTTGCTTAAA  
CCAGGAGGGTTTCTGGTCATCATGGATGCCTTGAAGTgCCTTACTACATGATTGGGGAAACAGAAGTTCTCAatgTTACCTTTGGGCCGTGAAG  
CCGTAGAAGCGGCCGTAAGGAGGCGGGGTACACCATTGAATGGTTCGAGGTTATTTACAGTCTTgAGCTCCACAATGGCAAATgCAGAGGG  
CTTATTTTCGCTGGTGTCTCGCAAACCTGAGTCGTCCTCTTCTCGAGCACCACCACCACCACCACCTGA

MESGFTSKDYLHFNPRDYLEKFKYKFSRHSAESQILKHLKLNLFKIFCLDGVKGDLLIDIGSGPTIYQLLSACESFKEIVVTDYSDQNLQEL  
EKWLKKEPEAFDWSPVVTVYVCDLEGNRVKGPKEEKLKQAVKQVLKCDVTQSQPLGAVPLPPADCVLSTLCLHAACPDLPTYCRALRNLGSLK  
PGGFLVIMDALKCSYYMIGEOKFSMLPLGREAVEAAVKEAGYTIWFVEVISQSYSSSTMANAEGFLSLVARKLSRPLLEHHHHHH

>v29

ATGGAGAGTGGATTTACGAGTAAGGACACTTATTTGAGTCATTTTAAACCCGCGGACTACTTAGAAAAAActACAAGTTTGAAGCCGCCATT  
CAGCAGAATCACAAATTTCTGAAACACCTTTTAAAGAACCTGTTTAAAACTTCTGTTTAGATGGGGTCAAAGGAGATTTGTTGATTGACATCGG  
ATCAGGTCCCACAATTTACCAACTTCTGTCCGCTTGTGAGAGTTTAAAGGAGATCGTCTGACGGACTATTAGATCAAAATCTGCAAGAAGCTG  
GAGAAATGGTTAAAGAAAGAACCAGAGGCGTTCGATTGGAGCCAGTTGTGACCTATGTCTGTGATCTTGAAGGAAACCCGCTAAAGGGTCTCG  
AAAAGGAGGAAAAGCTGCGCAAAGCCGTAAGCAAGTATTAAATGTGATGTTACTCAAAGCCAACCATTAGGAGCCGTCCTCCACTGCCCCCGGC  
GGATTGTGATTGTCAACCTTTGCTTgCGCAGCTTGTCTGACTTGCCCTACATATTGTCTGTCATTACGCAACTTAGGAAGTTGCTTAAA  
CCAGGAGGGTTTCTGGTCATCATGGATGCCTTGAAGTgCCTTACTACATGATTGGGGAAACAGAAGTTCTCAatgTTACCTTTGGGCCGTGAAG  
CCGTAGAAGCGGCCGTAAGGAGGCGGGGTACACCATTGAATGGTTCGAGGTTATTTACAGTCTTgAGCTCCACAATGGCAAATgCAGAGGG  
CTTATTTTCGCTGGTGTCTCGCAAACCTGAGTCGTCCTCTTCTCGAGCACCACCACCACCACCACCTGA

MESGFTSKDYLHFNPRDYLEKFKYKFSRHSAESQILKHLKLNLFKIFCLDGVKGDLLIDIGSGPTIYQLLSACESFKEIVVTDYSDQNLQEL  
EKWLKKEPEAFDWSPVVTVYVCDLEGNRVKGPKEEKLKQAVKQVLKCDVTQSQPLGAVPLPPADCVLSTLCLCAACPDLPTYCRALRNLGSLK  
PGGFLVIMDALKTSYYMIGEOKFSALPLGREAVEAAVKEAGYTIWFVEVISQSYSSSTMANAEGFLSLVARKLSRPLLEHHHHHH

>v30

ATGGAGAGTGGATTTACGAGTAAGGACACTTATTTGAGTCATTTTAACCCGCGGACTACTTAGAAAAATACTACAAGTTTGAAGCCGCCATT  
CAGCAGAATCACAAATTTCTGAAACACCTTTTAAAGAACCTGTTTAAAAATCTTCTGTTTAGATGGGGTCAAAGGAGATTTGTTGATTGACATCGG  
ATCAGGTCCCACAATTTACCAACTTCTGTCCGCTTGTGAGAGTTTTAAGGAGATCGTCGTGACGGACTATTAGATCAAAATCTGCAAGAAGCTG  
GAGAAATGGTTAAAGAAAGAACCAGAGGCGTTCGATTGGAGCCAGTTGTGACCTATGTCTGTGATCTTGAAGGAAACCCGCTAAAGGGTCTCG  
AAAAGGAGGAAAAGCTGCGCAAAGCCGTAAGCAAGTATTTAAATGTGATGTTACTCAAAGCCAACCATTAGGAGCCGTCCTCCACTGCCCCCGGC  
GGATTGTGATTTGCAACCTTTGCTTgCGCAGCTTGTCTGACTTGCCTACATATTGTCTGTCGATTACGCAACTTAGGAAGTTTGCCTAAA  
CCAGGAGGGTTTTCTGGTCATCATGGATGCCTTGAAGcagTCCTACTACATGATTGGGGAACAGAAGTTCTCATCTTTACCTTTGGGCCGTGAAG  
CCGTAGAAGCGGCCGTAAGGAGGCGGGGTACACCATTGAATGGTTCGAGGTTATTTACAGTCTTgAGCTCCACAATGGCAAATtcCGAGGG  
CTTATTTTCGCTGGTGTCTCGCAAACCTGAGTCGTCCTCTTCTCGAGCACCACCACCACCACCTGA

MESGFTSKDITYLSHFNPRDYLEKYYKFGSRHSAESQILKHLKLNLFKIFCLDGVKGDLLIDIGSGPTIYQLLSACESFKEIVVTDYSDQNLQEL  
EKWLKKEPEAFDWSPVVTVYVCDLEGNRVKGPKEEKLKQAVKQVLKCDVTQSQPLGAVPLPPADCVLSTLCLCAACPDLPTYCRALRNLGSLK  
PGGFLVIMDALKQSYMIGEQQFSSPLPLGREAVEAAVKEAGYTIWFVEVISQSWSSSTMANCEGLFSLVARKLSRPLLEHHHHHH

>v31

ATGGAGAGTGGATTTACGAGTAAGGACACTTATTTGAGTCATTTTAACCCGCGGACTACTTAGAAAAATACTACAAGTTTGAAGCCGCCATT  
CAGCAGAATCACAAATTTCTGAAACACCTTTTAAAGAACCTGTTTAAAAATCTTCTGTTTAGATGGGGTCAAAGGAGATTTGTTGATTGACATCGG  
ATCAGGTCCCACAATTTACCAACTTCTGTCCGCTTGTGAGAGTTTTAAGGAGATCGTCGTGACGGACTATTAGATCAAAATCTGCAAGAAGCTG  
GAGAAATGGTTAAAGAAAGAACCAGAGGCGTTCGATTGGAGCCAGTTGTGACCTATGTCTGTGATCTTGAAGGAAACCCGCTAAAGGGTCTCG  
AAAAGGAGGAAAAGCTGCGCAAAGCCGTAAGCAAGTATTTAAATGTGATGTTACTCAAAGCCAACCATTAGGAGCCGTCCTCCACTGCCCCCGGC  
GGATTGTGATTTGCAACCTTTGCTTgCGCAGCTTGTCTGACTTGCCTACATATTGTCTGTCGATTACGCAACTTAGGAAGTTTGCCTAAA  
CCAGGAGGGTTTTCTGGTCATCATGGATGCCTTGAAGcagTCCTACTACATGATTGGGGAACAGAAGTTCTCATCTTTACCTTTGGGCCGTGAAG  
CCGTAGAAGCGGCCGTAAGGAGGCGGGGTACACCATTGAATGGTTCGAGGTTATTTACAGTCTTcAGCTCCACAATGGCAAATtcCGAGGG  
CTTATTTTCGCTGGTGTCTCGCAAACCTGAGTCGTCCTCTTCTCGAGCACCACCACCACCACCTGA

MESGFTSKDITYLSHFNPRDYLEKYYKFGSRHSAESQILKHLKLNLFKIFCLDGVKGDLLIDIGSGPTIYQLLSACESFKEIVVTDYSDQNLQEL  
EKWLKKEPEAFDWSPVVTVYVCDLEGNRVKGPKEEKLKQAVKQVLKCDVTQSQPLGAVPLPPADCVLSTLCLHAACPDLPTYCRALRNLGSLK  
PGGFLVIMDLKCSYMIQEQQFSSPLPLGREAVEAAVKEAGYTIWFVEVISQFSSTMANSEGLFSLVARKLSRPLLEHHHHHH

>v32

ATGGAGAGTGGATTTACGAGTAAGGACACTTATTTGAGTCATTTTAACCCGCGGACTACTTAGAAAAAttCTACAAGTTTGAAGCCGCCATT  
CAGCAGAATCACAAATTTCTGAAACACCTTTTAAAGAACCTGTTTAAAAATCTTCTGTTTAGATGGGGTCAAAGGAGATTTGTTGATTGACATCGG  
ATCAGGTCCCACAATTTACCAACTTCTGTCCGCTTGTGAGAGTTTTAAGGAGATCGTCGTGACGGACTATTAGATCAAAATCTGCAAGAAGCTG  
GAGAAATGGTTAAAGAAAGAACCAGAGGCGTTCGATTGGAGCCAGTTGTGACCTATGTCTGTGATCTTGAAGGAAACCCGCTAAAGGGTCTCG  
AAAAGGAGGAAAAGCTGCGCAAAGCCGTAAGCAAGTATTTAAATGTGATGTTACTCAAAGCCAACCATTAGGAGCCGTCCTCCACTGCCCCCGGC  
GGATTGTGATTTGCAACCTTTGCTTgCGCAGCTTGTCTGACTTGCCTACATATTGTCTGTCGATTACGCAACTTAGGAAGTTTGCCTAAA  
CCAGGAGGGTTTTCTGGTCATCATGGATGCCTTGAAGcagTCCTACTACATGATTGGGGAACAGAAGTTCTCATCTTTACCTTTGGGCCGTGAAG  
CCGTAGAAGCGGCCGTAAGGAGGCGGGGTACACCATTGAATGGTTCGAGGTTATTTACAGTCTTcAGCTCCACAATGGCAAATtcCGAGGG  
CTTATTTTCGCTGGTGTCTCGCAAACCTGAGTCGTCCTCTTCTCGAGCACCACCACCACCACCTGA

MESGFTSKDITYLSHFNPRDYLEKYYKFGSRHSAESQILKHLKLNLFKIFCLDGVKGDLLIDIGSGPTIYQLLSACESFKEIVVTDYSDQNLQEL  
EKWLKKEPEAFDWSPVVTVYVCDLEGNRVKGPKEEKLKQAVKQVLKCDVTQSQPLGAVPLPPADCVLSTLCLHAACPDLPTYCRALRNLGSLK  
PGGFLVIMDALKQSYMIGEQQFSSPLPLGREAVEAAVKEAGYTIWFVEVISQSWSSSTMANCEGLFSLVARKLSRPLLEHHHHHH

>v33

ATGGAGAGTGGATTTACGAGTAAGGACACTTATTTGAGTCATTTTAACCCGCGGACTACTTAGAAAAATACTACAAGTTTGAAGCCGCCATT  
CAGCAGAATCACAAATTTCTGAAACACCTTTTAAAGAACCTGTTTAAAAATCTTCTGTTTAGATGGGGTCAAAGGAGATTTGTTGATTGACATCGG  
ATCAGGTCCCACAATTTACCAACTTCTGTCCGCTTGTGAGAGTTTTAAGGAGATCGTCGTGACGGACTATTAGATCAAAATCTGCAAGAAGCTG  
GAGAAATGGTTAAAGAAAGAACCAGAGGCGTTCGATTGGAGCCAGTTGTGACCTATGTCTGTGATCTTGAAGGAAACCCGCTAAAGGGTCTCG  
AAAAGGAGGAAAAGCTGCGCAAAGCCGTAAGCAAGTATTTAAATGTGATGTTACTCAAAGCCAACCATTAGGAGCCGTCCTCCACTGCCCCCGGC  
GGATTGTGATTTGCAACCTTTGCTTgCGCAGCTTGTCTGACTTGCCTACATATTGTCTGTCGATTACGCAACTTAGGAAGTTTGCCTAAA  
CCAGGAGGGTTTTCTGGTCATCATGGATgTGAAGTgCTCTACTACATGATTGGGGAACAGAAGTTCTCATgTTACCTTTGGGCCGTGAAG  
CCGTAGAAGCGGCCGTAAGGAGGCGGGGTACACCATTGAATGGTTCGAGGTTATTTACAGTCTTcAGCTCCACAATGGCAAATAACGAGGG  
CTTATTTTCGCTGGTGTCTCGCAAACCTGAGTCGTCCTCTTCTCGAGCACCACCACCACCACCTGA

MESGFTSKDITYLSHFNPRDYLEKYYKFGSRHSAESQILKHLKLNLFKIFCLDGVKGDLLIDIGSGPTIYQLLSACESFKEIVVTDYSDQNLQEL  
EKWLKKEPEAFDWSPVVTVYVCDLEGNRVKGPKEEKLKQAVKQVLKCDVTQSQPLGAVPLPPADCVLSTLCLCAACPDLPTYCRALRNLGSLK  
PGGFLVIMDLKCSYMIQEQQFSSPLPLGREAVEAAVKEAGYTIWFVEVISQFSSTMANSEGLFSLVARKLSRPLLEHHHHHH

>v34

ATGGAGAGTGGATTTACGAGTAAGGACACTTATTTGAGTCATTTTAACCCGCGGACTACTTAGAAAAATACTACAAGTTTGAAGCCGCCATT  
CAGCAGAATCACAAATTTCTGAAACACCTTTTAAAGAACCTGTTTAAAAATCTTCTGTTTAGATGGGGTCAAAGGAGATTTGTTGATTGACATCGG  
ATCAGGTCCCACAATTTACCAACTTCTGTCCGCTTGTGAGAGTTTTAAGGAGATCGTCGTGACGGACTATTAGATCAAAATCTGCAAGAAGCTG  
GAGAAATGGTTAAAGAAAGAACCAGAGGCGTTCGATTGGAGCCAGTTGTGACCTATGTCTGTGATCTTGAAGGAAACCCGCTAAAGGGTCTCG  
AAAAGGAGGAAAAGCTGCGCAAAGCCGTAAGCAAGTATTTAAATGTGATGTTACTCAAAGCCAACCATTAGGAGCCGTCCTCCACTGCCCCCGGC  
GGATTGTGATTTGCAACCTTTGCTTgCGCAGCTTGTCTGACTTGCCTACATATTGTCTGTCGATTACGCAACTTAGGAAGTTTGCCTAAA  
CCAGGAGGGTTTTCTGGTCATCATGGATgTGAAGgTCTCTACTACATGATTGGGGAACAGAAGTTCTCATgTTACCTTTGGGCCGTGAAG  
CCGTAGAAGCGGCCGTAAGGAGGCGGGGTACACCATTGAATGGTTCGAGGTTATTTACAGTCTTcAGCTCCACAATGGCAAATAACGAGGG  
CTTATTTTCGCTGGTGTCTCGCAAACCTGAGTCGTCCTCTTCTCGAGCACCACCACCACCACCTGA

MESGFTSKDITYLSHFNPRDYLEKYYKFGSRHSAESQILKHLKLNLFKIFCLDGVKGDLLIDIGSGPTIYQLLSACESFKEIVVTDYSDQNLQEL  
EKWLKKEPEAFDWSPVVTVYVCDLEGNRVKGPKEEKLKQAVKQVLKCDVTQSQPLGAVPLPPADCVLSTLCLHAACPDLPTYCRALRNLGSLK  
PGGFLVIMDALKESYMIQEQQFSALPLPLGREAVEAAVKEAGYTIWFVEVISQFSSTMANSEGLFSLVARKLSRPLLEHHHHHH



>v35

ATGGAGAGTGGATTTACGAGTAAGGACACTTATTTGAGTCATTTTAAACCCGCGGACTACTTAGAAAAATACTACAAGTTTGAAGCCGCCATT  
CAGCAGAATCACAAATTTCTGAAACACCTTTTAAAGAACCTGTTTAAAAATCTTCTGTTTAGATGGGGTCAAAGGAGATTTGTTGATTGACATCGG  
ATCAGGTCCCACAATTTACCAACTTCTGTCCGCTTGTGAGAGTTTAAAGGAGATCGTCTGACGGACTATTAGATCAAAATCTGCAAGAAGCTG  
GAGAAATGGTTAAAGAAAGAACCAGAGGCGTTCGATTGGAGCCAGTTGTGACCTATGTCTGTGATCTTGAAGGAAACCCGCTAAAGGGTCTCG  
AAAAGGAGGAAAAGCTGCGCAAGCCGTAAGCAAGTATTTAAATGTGATGTTACTCAAAGCCAACCATTTAGGAGCCGTCCTCCACTGCCCCCGGC  
GGATTGTGATTGTCAACCCCTTGTCTTgCGCAGCTTGTCTGACTTGCTACATATTTGTCGTGATACGCAACTTAGGAAGTTTGCCTAAA  
CCAGGAGGGTTTCTGGTCATCATGGGtTctgTTGAAGgCgTCCTACTACATGATTGGGGAAACAGAAGTTCTCagCgTTACCTTTGGGCCGTGAAG  
CCGTAGAAGCGGCCGTAAGGAGGCGGGGTACACCATTGAATGGTTCGAGGTTATTTACAGTCTtCAGCTCCACAATGGCAAATAACGAGGG  
CTTATTTTCGCTGGTGTCTCGCAAACTGAGTCGTCCTCTTCTCGAGCACCACCACCACCACCTGA

MESGFTSKDITYLSHFNPRDYLEKYYKFGSRHSAESQILKHLKLNLFKIFCLDGVKGDLLIDIGSGPTIYQLLSACESFKEIVVTDYSDQNLQEL  
EKWLKKEPEAFDWSPVVTVYVCDLEGNRVKGPKEEKLKRVQAVKQVLKCDVTQSQPLGAVPLPPADCVLSTLCLDAACPDLPYCRALRNLGSLK  
PGGFLVIMGLLKASYMIGEYKFSALPLGREAVEAAVKEAGYTIWFVEVISQSFSSSTMANNEGLFSLVARKLSRPLLEHHHHHH

>v36

ATGGAGAGTGGATTTACGAGTAAGGACACTTATTTGAGTCATTTTAAACCCGCGGACTACTTAGAAAAATtCTACAAGTTTGAAGCCGCCATT  
CAGCAGAATCACAAATTTCTGAAACACCTTTTAAAGAACCTGTTTAAAAATCTTCTGTTTAGATGGGGTCAAAGGAGATTTGTTGATTGACATCGG  
ATCAGGTCCCACAATTTACCAACTTCTGTCCGCTTGTGAGAGTTTAAAGGAGATCGTCTGACGGACTATTAGATCAAAATCTGCAAGAAGCTG  
GAGAAATGGTTAAAGAAAGAACCAGAGGCGTTCGATTGGAGCCAGTTGTGACCTATGTCTGTGATCTTGAAGGAAACCCGCTAAAGGGTCTCG  
AAAAGGAGGAAAAGCTGCGCAAGCCGTAAGCAAGTATTTAAATGTGATGTTACTCAAAGCCAACCATTTAGGAGCCGTCCTCCACTGCCCCCGGC  
GGATTGTGATTGTCAACCCCTTGTCTTgCGCAGCTTGTCTGACTTGCTACATATTTGTCGTGATACGCAACTTAGGAAGTTTGCCTAAA  
CCAGGAGGGTTTCTGGTCATCATGGATaCCTTGAAGTgCCTTACTACATGATTGGGGAAACAGAAGTTCTCagCgTTACCTTTGGGCCGTGAAG  
CCGTAGAAGCGGCCGTAAGGAGGCGGGGTACACCATTGAATGGTTCGAGGTTATTTACAGTCTTACAGCTCCACAATGGCAAATAACGAGGG  
CTTATTTTCGCTGGTGTCTCGCAAACTGAGTCGTCCTCTTCTCGAGCACCACCACCACCACCTGA

MESGFTSKDITYLSHFNPRDYLEKYYKFGSRHSAESQILKHLKLNLFKIFCLDGVKGDLLIDIGSGPTIYQLLSACESFKEIVVTDYSDQNLQEL  
EKWLKKEPEAFDWSPVVTVYVCDLEGNRVKGPKEEKLKRVQAVKQVLKCDVTQSQPLGAVPLPPADCVLSTLCLCAACPDLPYCRALRNLGSLK  
PGGFLVIMDTLKSYYMIGEYKFSALPLGREAVEAAVKEAGYTIWFVEVISQSYSSSTMANNEGLFSLVARKLSRPLLEHHHHHH

>v37

ATGGAGAGTGGATTTACGAGTAAGGACACTTATTTGAGTCATTTTAAACCCGCGGACTACTTAGAAAAATACTACAAGTTTGAAGCCGCCATT  
CAGCAGAATCACAAATTTCTGAAACACCTTTTAAAGAACCTGTTTAAAAATCTTCTGTTTAGATGGGGTCAAAGGAGATTTGTTGATTGACATCGG  
ATCAGGTCCCACAATTTACCAACTTCTGTCCGCTTGTGAGAGTTTAAAGGAGATCGTCTGACGGACTATTAGATCAAAATCTGCAAGAAGCTG  
GAGAAATGGTTAAAGAAAGAACCAGAGGCGTTCGATTGGAGCCAGTTGTGACCTATGTCTGTGATCTTGAAGGAAACCCGCTAAAGGGTCTCG  
AAAAGGAGGAAAAGCTGCGCAAGCCGTAAGCAAGTATTTAAATGTGATGTTACTCAAAGCCAACCATTTAGGAGCCGTCCTCCACTGCCCCCGGC  
GGATTGTGATTGTCAACCCCTTGTCTTgCAGCAGCTTGTCTGACTTGCTACATATTTGTCGTGATACGCAACTTAGGAAGTTTGCCTAAA  
CCAGGAGGGTTTCTGGTCATCATGGATaCCTTGAAGgaaCTTACTACATGATTGGGGAAACAGAAGTTCTCagCgTTACCTTTGGGCCGTGAAG  
CCGTAGAAGCGGCCGTAAGGAGGCGGGGTACACCATTGAATGGTTCGAGGTTATTTACAGTCTTgAGCTCCACAATGGCAAATAACGAGGG  
CTTATTTTCGCTGGTGTCTCGCAAACTGAGTCGTCCTCTTCTCGAGCACCACCACCACCACCTGA

MESGFTSKDITYLSHFNPRDYLEKYYKFGSRHSAESQILKHLKLNLFKIFCLDGVKGDLLIDIGSGPTIYQLLSACESFKEIVVTDYSDQNLQEL  
EKWLKKEPEAFDWSPVVTVYVCDLEGNRVKGPKEEKLKRVQAVKQVLKCDVTQSQPLGAVPLPPADCVLSTLCLHAACPDLPYCRALRNLGSLK  
PGGFLVIMDTLKSYYMIGEYKFSALPLGREAVEAAVKEAGYTIWFVEVISQSWSSSTMANNEGLFSLVARKLSRPLLEHHHHHH

>v38

ATGGAGAGTGGATTTACGAGTAAGGACACTTATTTGAGTCATTTTAAACCCGCGGACTtCTTAGAAAAATACTACAAGTTTGAAGCCGCCATT  
CAGCAGAATCACAAATTTCTGAAACACCTTTTAAAGAACCTGTTTAAAAATCTTCTGTTTAGATGGGGTCAAAGGAGATTTGTTGATTGACATCGG  
ATCAGGTCCCACAATTTACCAACTTCTGTCCGCTTGTGAGAGTTTAAAGGAGATCGTCTGACGGACTATTAGATCAAAATCTGCAAGAAGCTG  
GAGAAATGGTTAAAGAAAGAACCAGAGGCGTTCGATTGGAGCCAGTTGTGACCTATGTCTGTGATCTTGAAGGAAACCCGCTAAAGGGTCTCG  
AAAAGGAGGAAAAGCTGCGCAAGCCGTAAGCAAGTATTTAAATGTGATGTTACTCAAAGCCAACCATTTAGGAGCCGTCCTCCACTGCCCCCGGC  
GGATTGTGATTGTCAACCCCTTGTCTTgCGCAGCTTGTCTGACTTGCTACATATTTGTCGTGATACGCAACTTAGGAAGTTTGCCTAAA  
CCAGGAGGGTTTCTGGTCATCATGGATGCCTTGAAGatgTCCTACTACATGATTGGGGAAACAGAAGTTCTCATCTTACCTTTGGGCCGTGAAG  
CCGTAGAAGCGGCCGTAAGGAGGCGGGGTACACCATTGAATGGTTCGAGGTTATTTACAGTCTtCAGCTCCACAATGGCAAATgCAGGAGGG  
CTTATTTTCGCTGGTGTCTCGCAAACTGAGTCGTCCTCTTCTCGAGCACCACCACCACCACCTGA

MESGFTSKDITYLSHFNPRDYLEKYYKFGSRHSAESQILKHLKLNLFKIFCLDGVKGDLLIDIGSGPTIYQLLSACESFKEIVVTDYSDQNLQEL  
EKWLKKEPEAFDWSPVVTVYVCDLEGNRVKGPKEEKLKRVQAVKQVLKCDVTQSQPLGAVPLPPADCVLSTLCLCAACPDLPYCRALRNLGSLK  
PGGFLVIMDALKMSYYMIGEYKFSALPLGREAVEAAVKEAGYTIWFVEVISQSFSSSTMANAEGFLFSLVARKLSRPLLEHHHHHH

>v39

ATGGAGAGTGGATTTACGAGTAAGGACACTTATTTGAGTCATTTTAAACCCGCGGACTtCTTAGAAAAATACTACAAGTTTGAAGCCGCCATT  
CAGCAGAATCACAAATTTCTGAAACACCTTTTAAAGAACCTGTTTAAAAATCTTCTGTTTAGATGGGGTCAAAGGAGATTTGTTGATTGACATCGG  
ATCAGGTCCCACAATTTACCAACTTCTGTCCGCTTGTGAGAGTTTAAAGGAGATCGTCTGACGGACTATTAGATCAAAATCTGCAAGAAGCTG  
GAGAAATGGTTAAAGAAAGAACCAGAGGCGTTCGATTGGAGCCAGTTGTGACCTATGTCTGTGATCTTGAAGGAAACCCGCTAAAGGGTCTCG  
AAAAGGAGGAAAAGCTGCGCAAGCCGTAAGCAAGTATTTAAATGTGATGTTACTCAAAGCCAACCATTTAGGAGCCGTCCTCCACTGCCCCCGGC  
GGATTGTGATTGTCAACCCCTTGTCTTgCAGCAGCTTGTCTGACTTGCTACATATTTGTCGTGATACGCAACTTAGGAAGTTTGCCTAAA  
CCAGGAGGGTTTCTGGTCATCATGGATgCCTTGAAGatgTCCTACTACATGATTGGGGAAACAGAAGTTCTCATCTTACCTTTGGGCCGTGAAG  
CCGTAGAAGCGGCCGTAAGGAGGCGGGGTACACCATTGAATGGTTCGAGGTTATTTACAGTCTTACAGCTCCACAATGGCAAATgCAGGAGGG  
CTTATTTTCGCTGGTGTCTCGCAAACTGAGTCGTCCTCTTCTCGAGCACCACCACCACCACCTGA

MESGFTSKDITYLSHFNPRDYLEKYYKFGSRHSAESQILKHLKLNLFKIFCLDGVKGDLLIDIGSGPTIYQLLSACESFKEIVVTDYSDQNLQEL  
EKWLKKEPEAFDWSPVVTVYVCDLEGNRVKGPKEEKLKRVQAVKQVLKCDVTQSQPLGAVPLPPADCVLSTLCLHAACPDLPYCRALRNLGSLK  
PGGFLVIMDKLSSYYMIGEYKFSALPLGREAVEAAVKEAGYTIWFVEVISQSYSSSTMANAEGFLFSLVARKLSRPLLEHHHHHH

>v40

ATGGAGAGTGGATTTACGAGTAAGGACACTTATTTGAGTCATTTTAAACCCGCGGACTACTTAGAAAAATACTACAAGTTTGAAGCCGCCATT  
CAGCAGAATCACAAATTTCTGAAACACCTTTTAAAGAACCTGTTTAAAAATCTTCTGTTTAGATGGGGTCAAAGGAGATTTGTTGATTGACATCGG  
ATCAGGTCCCACAATTTACCAACTTCTGTCCGCTTGTGAGAGTTTAAAGGAGATCGTCTGACGGACTATTAGATCAAAATCTGCAAGAAGCTG  
GAGAAATGGTTAAAGAAAGAACCAGAGGCGTTCGATTGGAGCCAGTTGTGACCTATGTCTGTGATCTTGAAGGAAACCCGCTAAAGGGTCTCG  
AAAAGGAGGAAAAGCTGCGCAAGCCGTAAGCAAGTATTTAAATGTGATGTTACTCAAAGCCAACCATTAGGAGCCGTCCTCCACTGCCCCCGGC  
GGATTGTGATTTGCAACCCCTTGTCTTgCACGACGCTTGTCTGACTTGCCTACATATTTGTCGTGCATTACGCAACTTAGGAAGTTTGCCTAAA  
CCAGGAGGGTTTCTGGTCATCATGGATctgTTGAAGgCgTCCTACTACATGATTGGGGAAACAGAAGTTCTCATgtTTACCTTTGGGCCGTGAAG  
CCGTAGAAGCGGCCGTAAGGAGGCGGGGTACACCATTGAATGGTTCGAGGTTATTTACAGTCTACAGCTCCACAATGGCAAATgCGAGGG  
CTTATTTTCGCTGGTGTCTCGCAAACTGAGTCGTCCTCTTCTCGAGCACCACCACCACCACCTGA

MESGFTSKDITYLSHFNPRDYLEKYYKFGSRHSAESQILKHLKLNLFKIFCLDGVKGDLLIDIGSGPTIYQLLSACESFKEIVVTDYSDQNLQEL  
EKWLKKEPEAFDWSVVYVCDLEGNRVKGPKEEKLKQAVKQVLKCDVTQSQPLGAVPLPPADCVLSTLCLHAACPDLPTYCRALRNLGSLK  
PGGFLVIMDLLKASYMIGEYKQFSLPLGREAVEAAVKEAGYTIWFVEVISQSYSTMANEGLFSLVARKLSRPLLEHHHHHH

>v41

ATGGAGAGTGGATTTACGAGTAAGGACACTTATTTGAGTCATTTTAAACCCGCGGACTtCTTAGAAAAATACTACAAGTTTGAAGCCGCCATT  
CAGCAGAATCACAAATTTCTGAAACACCTTTTAAAGAACCTGTTTAAAAATCTTCTGTTTAGATGGGGTCAAAGGAGATTTGTTGATTGACATCGG  
ATCAGGTCCCACAATTTACCAACTTCTGTCCGCTTGTGAGAGTTTAAAGGAGATCGTCTGACGGACTATTAGATCAAAATCTGCAAGAAGCTG  
GAGAAATGGTTAAAGAAAGAACCAGAGGCGTTCGATTGGAGCCAGTTGTGACCTATGTCTGTGATCTTGAAGGAAACCCGCTAAAGGGTCTCG  
AAAAGGAGGAAAAGCTGCGCAAGCCGTAAGCAAGTATTTAAATGTGATGTTACTCAAAGCCAACCATTAGGAGCCGTCCTCCACTGCCCCCGGC  
GGATTGTGATTTGCAACCCCTTGTCTTgCACGACGCTTGTCTGACTTGCCTACATATTTGTCGTGCATTACGCAACTTAGGAAGTTTGCCTAAA  
CCAGGAGGGTTTCTGGTCATCATGGATGctgTTGAAGgCgTCCTACTACATGATTGGGGAAACAGAAGTTCTCATCTTTACCTTTGGGCCGTGAAG  
CCGTAGAAGCGGCCGTAAGGAGGCGGGGTACACCATTGAATGGTTCGAGGTTATTTACAGTCTTgAGCTCCACAATGGCAAATgCGAGGG  
CTTATTTTCGCTGGTGTCTCGCAAACTGAGTCGTCCTCTTCTCGAGCACCACCACCACCACCTGA

MESGFTSKDITYLSHFNPRDFLEKYYKFGSRHSAESQILKHLKLNLFKIFCLDGVKGDLLIDIGSGPTIYQLLSACESFKEIVVTDYSDQNLQEL  
EKWLKKEPEAFDWSVVYVCDLEGNRVKGPKEEKLKQAVKQVLKCDVTQSQPLGAVPLPPADCVLSTLCLHAACPDLPTYCRALRNLGSLK  
PGGFLVIMDALKRSYYMIGEYKQFSSPLGREAVEAAVKEAGYTIWFVEVISQSWSTMANAEGFLSLVARKLSRPLLEHHHHHH

>v42

ATGGAGAGTGGATTTACGAGTAAGGACACTTATTTGAGTCATTTTAAACCCGCGGACcACTTAGAAAAATACTACAAGTTTGAAGCCGCCATT  
CAGCAGAATCACAAATTTCTGAAACACCTTTTAAAGAACCTGTTTAAAAATCTTCTGTTTAGATGGGGTCAAAGGAGATTTGTTGATTGACATCGG  
ATCAGGTCCCACAATTTACCAACTTCTGTCCGCTTGTGAGAGTTTAAAGGAGATCGTCTGACGGACTATTAGATCAAAATCTGCAAGAAGCTG  
GAGAAATGGTTAAAGAAAGAACCAGAGGCGTTCGATTGGAGCCAGTTGTGACCTATGTCTGTGATCTTGAAGGAAACCCGCTAAAGGGTCTCG  
AAAAGGAGGAAAAGCTGCGCAAGCCGTAAGCAAGTATTTAAATGTGATGTTACTCAAAGCCAACCATTAGGAGCCGTCCTCCACTGCCCCCGGC  
GGATTGTGATTTGCAACCCCTTGTCTTgCACGACGCTTGTCTGACTTGCCTACATATTTGTCGTGCATTACGCAACTTAGGAAGTTTGCCTAAA  
CCAGGAGGGTTTCTGGTCATCATGGATatgTTGAAGgCgTCCTACTACATGATTGGGGAAACAGAAGTTCTCATCTTTACCTTTGGGCCGTGAAG  
CCGTAGAAGCGGCCGTAAGGAGGCGGGGTACACCATTGAATGGTTCGAGGTTATTTACAGTCTTgAGCTCCACAATGGCAAATgCGAGGG  
CTTATTTTCGCTGGTGTCTCGCAAACTGAGTCGTCCTCTTCTCGAGCACCACCACCACCACCTGA

MESGFTSKDITYLSHFNPRDHLEKYYKFGSRHSAESQILKHLKLNLFKIFCLDGVKGDLLIDIGSGPTIYQLLSACESFKEIVVTDYSDQNLQEL  
EKWLKKEPEAFDWSVVYVCDLEGNRVKGPKEEKLKQAVKQVLKCDVTQSQPLGAVPLPPADCVLSTLCLHAACPDLPTYCRALRNLGSLK  
PGGFLVIMDMLKASYMIGEYKQFSSPLGREAVEAAVKEAGYTIWFVEVISQSYSTMANEGLFSLVARKLSRPLLEHHHHHH

>v43

ATGGAGAGTGGATTTACGAGTAAGGACACTTATTTGAGTCATTTTAAACCCGCGGACTACTTAGAAAAATACTACAAGTTTGAAGCCGCCATT  
CAGCAGAATCACAAATTTCTGAAACACCTTTTAAAGAACCTGTTTAAAAATCTTCTGTTTAGATGGGGTCAAAGGAGATTTGTTGATTGACATCGG  
ATCAGGTCCCACAATTTACCAACTTCTGTCCGCTTGTGAGAGTTTAAAGGAGATCGTCTGACGGACTATTAGATCAAAATCTGCAAGAAGCTG  
GAGAAATGGTTAAAGAAAGAACCAGAGGCGTTCGATTGGAGCCAGTTGTGACCTATGTCTGTGATCTTGAAGGAAACCCGCTAAAGGGTCTCG  
AAAAGGAGGAAAAGCTGCGCAAGCCGTAAGCAAGTATTTAAATGTGATGTTACTCAAAGCCAACCATTAGGAGCCGTCCTCCACTGCCCCCGGC  
GGATTGTGATTTGCAACCCCTTGTCTTgCACGACGCTTGTCTGACTTGCCTACATATTTGTCGTGCATTACGCAACTTAGGAAGTTTGCCTAAA  
CCAGGAGGGTTTCTGGTCATCATGGATatgTTGAAGaCcTCCTACTACATGATTGGGGAAACAGAAGTTCTCaCcTTACCTTTGGGCCGTGAAG  
CCGTAGAAGCGGCCGTAAGGAGGCGGGGTACACCATTGAATGGTTCGAGGTTATTTACAGTCTTgAGCTCCACAATGGCAAATAACGAGGG  
CTTATTTTCGCTGGTGTCTCGCAAACTGAGTCGTCCTCTTCTCGAGCACCACCACCACCACCTGA

MESGFTSKDITYLSHFNPRDYLEKYYKFGSRHSAESQILKHLKLNLFKIFCLDGVKGDLLIDIGSGPTIYQLLSACESFKEIVVTDYSDQNLQEL  
EKWLKKEPEAFDWSVVYVCDLEGNRVKGPKEEKLKQAVKQVLKCDVTQSQPLGAVPLPPADCVLSTLCLCAACPDLPTYCRALRNLGSLK  
PGGFLVIMDMLKTSYYMIGEYKQFSTLPLGREAVEAAVKEAGYTIWFVEVISQSYSTMANNEGLFSLVARKLSRPLLEHHHHHH

>v44

ATGGAGAGTGGATTTACGAGTAAGGACACTTATTTGAGTCATTTTAAACCCGCGGACTACTTAGAAAAATACTACAAGTTTGAAGCCGCCATT  
CAGCAGAATCACAAATTTCTGAAACACCTTTTAAAGAACCTGTTTAAAAATCTTCTGTTTAGATGGGGTCAAAGGAGATTTGTTGATTGACATCGG  
ATCAGGTCCCACAATTTACCAACTTCTGTCCGCTTGTGAGAGTTTAAAGGAGATCGTCTGACGGACTATTAGATCAAAATCTGCAAGAAGCTG  
GAGAAATGGTTAAAGAAAGAACCAGAGGCGTTCGATTGGAGCCAGTTGTGACCTATGTCTGTGATCTTGAAGGAAACCCGCTAAAGGGTCTCG  
AAAAGGAGGAAAAGCTGCGCAAGCCGTAAGCAAGTATTTAAATGTGATGTTACTCAAAGCCAACCATTAGGAGCCGTCCTCCACTGCCCCCGGC  
GGATTGTGATTTGCAACCCCTTGTCTTgCACGACGCTTGTCTGACTTGCCTACATATTTGTCGTGCATTACGCAACTTAGGAAGTTTGCCTAAA  
CCAGGAGGGTTTCTGGTCATCATGGATatgTTGAAGaCcTCCTACTACATGATTGGGGAAACAGAAGTTCTCaCcTTACCTTTGGGCCGTGAAG  
CCGTAGAAGCGGCCGTAAGGAGGCGGGGTACACCATTGAATGGTTCGAGGTTATTTACAGTCTTgAGCTCCACAATGGCAAATAACGAGGG  
CTTATTTTCGCTGGTGTCTCGCAAACTGAGTCGTCCTCTTCTCGAGCACCACCACCACCACCTGA

MESGFTSKDITYLSHFNPRDYLEKYYKFGSRHSAESQILKHLKLNLFKIFCLDGVKGDLLIDIGSGPTIYQLLSACESFKEIVVTDYSDQNLQEL  
EKWLKKEPEAFDWSVVYVCDLEGNRVKGPKEEKLKQAVKQVLKCDVTQSQPLGAVPLPPADCVLSTLCLHAACPDLPTYCRALRNLGSLK  
PGGFLVIMDMLKCSYFMIGEYKQFSLPLGREAVEAAVKEAGYTIWFVEVISQSYSTMANNEGLFSLVARKLSRPLLEHHHHHH

>v45

ATGGAGAGTGGATTTACGAGTAAGGACACTTATTTGAGTCATTTTAAACCCGCGGACTtCTTAGAAAAATACTACAAGTTTGAAGCCGCCATT  
CAGCAGAATCACAAATTTCTGAAACACCTTTTAAAGAACCTGTTTAAAAATCTTCTGTTTAGATGGGGTCAAAGGAGATTTGTTGATTGACATCGG  
ATCAGGTCCCACAATTTACCAACTTCTGTCCGCTTGTGAGAGTTTAAAGGAGATCGTCTGACGGACTATTAGATCAAAATCTGCAAGAAGCTG  
GAGAAATGGTTAAAGAAAGAACCAGAGGCGTTCGATTGGAGCCAGTTGTGACCTATGTCTGTGATCTTGAAGGAAACCCGCTAAAGGGTCTCG  
AAAAGGAGGAAAAGCTGCGCAAAGCCGTAAGCAAGTATTTAAATGTGATGTTACTCAAAGCCAACCATTAGGAGCCGTCCTCCACTGCCCCCGGC  
GGATTGTGATTGTCAACCCCTTGTCTTGCACGAGCTTGTCTGACTTGCCTACATATTGTCTGTCATTACGCAACTTAGGAAGTTTGCCTAAA  
CCAGGAGGGTTTCTGGTCATCATGGATatgTTGAAGTCATCTACTACATGATTGGGGAACAGAAGTTCTCATCTTTACCTTTGGGCCGTGAAG  
CCGTAGAAGCGGCCGTAAGGAGGCGGGGTACACCATTGAATGGTTCGAGGTTATTTACAGTCTtCAGCTCCACAATGGCAAATtgcGAGGG  
CTTATTTTCGCTGGTGTCTCGCAAACCTGAGTCGTCCTCTTCTCGAGCACCACCACCACCACCTGA

MESGFTSKDITYLSHFNPRDFLEKYYKFGSRHSAESQILKHLKLNLFKIFCLDGVKGDLLIDIGSGPTIYQLLSACESFKEIVVTDYSDQNLQEL  
EKWLKKEPEAFDWSPVVTVYVCDLEGNRVKGPKEEKLKRVQAVKQVLKCDVTQSQPLGAVPLPPADCVLSTLCLHAACPDLPTYCRALRNLGSLK  
PGGFLVIMDKLSSYYMIGEOKFSSPLGREAVEAAVKEAGYTIWFVEVISQSFSSSTMANCEGLFSLVARKLSRPLLEHHHHHH

>v46

ATGGAGAGTGGATTTACGAGTAAGGACACTTATTTGAGTCATTTTAAACCCGCGGACTACTTAGAAAAATACTACAAGTTTGAAGCCGCCATT  
CAGCAGAATCACAAATTTCTGAAACACCTTTTAAAGAACCTGTTTAAAAATCTTCTGTTTAGATGGGGTCAAAGGAGATTTGTTGATTGACATCGG  
ATCAGGTCCCACAATTTACCAACTTCTGTCCGCTTGTGAGAGTTTAAAGGAGATCGTCTGACGGACTATTAGATCAAAATCTGCAAGAAGCTG  
GAGAAATGGTTAAAGAAAGAACCAGAGGCGTTCGATTGGAGCCAGTTGTGACCTATGTCTGTGATCTTGAAGGAAACCCGCTAAAGGGTCTCG  
AAAAGGAGGAAAAGCTGCGCAAAGCCGTAAGCAAGTATTTAAATGTGATGTTACTCAAAGCCAACCATTAGGAGCCGTCCTCCACTGCCCCCGGC  
GGATTGTGATTGTCAACCCCTTGTCTTGGACGAGCTTGTCTGACTTGCCTACATATTGTCTGTCATTACGCAACTTAGGAAGTTTGCCTAAA  
CCAGGAGGGTTTCTGGTCATCATGGATatgTTGAAGTCATCTACTACATGATTGGGGAACAGAAGTTCTCAgCgTTACCTTTGGGCCGTGAAG  
CCGTAGAAGCGGCCGTAAGGAGGCGGGGTACACCATTGAATGGTTCGAGGTTATTTACAGTCTtCAGCTCCACAATGtgcAATAACGAGGG  
CTTATTTTCGCTGGTGTCTCGCAAACCTGAGTCGTCCTCTTCTCGAGCACCACCACCACCACCTGA

MESGFTSKDITYLSHFNPRDYLEKYYKFGSRHSAESQILKHLKLNLFKIFCLDGVKGDLLIDIGSGPTIYQLLSACESFKEIVVTDYSDQNLQEL  
EKWLKKEPEAFDWSPVVTVYVCDLEGNRVKGPKEEKLKRVQAVKQVLKCDVTQSQPLGAVPLPPADCVLSTLCLDAACPDLPTYCRALRNLGSLK  
PGGFLVIMGMLKSSYYMIGEOKFSALPLGREAVEAAVKEAGYTIWFVEVISQSFSSSTMCNNEGLFSLVARKLSRPLLEHHHHHH

>v47

ATGGAGAGTGGATTTACGAGTAAGGACACTTATTTGAGTCATTTTAAACCCGCGGACTACTTAGAAAAATACTACAAGTTTGAAGCCGCCATT  
CAGCAGAATCACAAATTTCTGAAACACCTTTTAAAGAACCTGTTTAAAAATCTTCTGTTTAGATGGGGTCAAAGGAGATTTGTTGATTGACATCGG  
ATCAGGTCCCACAATTTACCAACTTCTGTCCGCTTGTGAGAGTTTAAAGGAGATCGTCTGACGGACTATTAGATCAAAATCTGCAAGAAGCTG  
GAGAAATGGTTAAAGAAAGAACCAGAGGCGTTCGATTGGAGCCAGTTGTGACCTATGTCTGTGATCTTGAAGGAAACCCGCTAAAGGGTCTCG  
AAAAGGAGGAAAAGCTGCGCAAAGCCGTAAGCAAGTATTTAAATGTGATGTTACTCAAAGCCAACCATTAGGAGCCGTCCTCCACTGCCCCCGGC  
GGATTGTGATTGTCAACCCCTTGTCTTGAAGCAGCTTGTCTGACTTGCCTACATATTGTCTGTCATTACGCAACTTAGGAAGTTTGCCTAAA  
CCAGGAGGGTTTCTGGTCATCATGGATgTCCCTGAAGaCTCCTACTACATGATTGGGGAACAGAAGTTCTCAgCgTTACCTTTGGGCCGTGAAG  
CCGTAGAAGCGGCCGTAAGGAGGCGGGGTACACCATTGAATGGTTCGAGGTTATTTACAGTCTtCAGCTCCACAATGGCAAATAACGAGGG  
CTTATTTTCGCTGGTGTCTCGCAAACCTGAGTCGTCCTCTTCTCGAGCACCACCACCACCACCTGA

MESGFTSKDITYLSHFNPRDYLEKYYKFGSRHSAESQILKHLKLNLFKIFCLDGVKGDLLIDIGSGPTIYQLLSACESFKEIVVTDYSDQNLQEL  
EKWLKKEPEAFDWSPVVTVYVCDLEGNRVKGPKEEKLKRVQAVKQVLKCDVTQSQPLGAVPLPPADCVLSTLCLCAACPDLPTYCRALRNLGSLK  
PGGFLVIMGALKNSYYMIGEOKFSALPLGREAVEAAVKEAGYTIWFVEVISQSFSSSTMANNEGLFSLVARKLSRPLLEHHHHHH

>v48

ATGGAGAGTGGATTTACGAGTAAGGACACTTATTTGAGTCATTTTAAACCCGCGGACTtCTTAGAAAAATACTACAAGTTTGAAGCCGCCATT  
CAGCAGAATCACAAATTTCTGAAACACCTTTTAAAGAACCTGTTTAAAAATCTTCTGTTTAGATGGGGTCAAAGGAGATTTGTTGATTGACATCGG  
ATCAGGTCCCACAATTTACCAACTTCTGTCCGCTTGTGAGAGTTTAAAGGAGATCGTCTGACGGACTATTAGATCAAAATCTGCAAGAAGCTG  
GAGAAATGGTTAAAGAAAGAACCAGAGGCGTTCGATTGGAGCCAGTTGTGACCTATGTCTGTGATCTTGAAGGAAACCCGCTAAAGGGTCTCG  
AAAAGGAGGAAAAGCTGCGCAAAGCCGTAAGCAAGTATTTAAATGTGATGTTACTCAAAGCCAACCATTAGGAGCCGTCCTCCACTGCCCCCGGC  
GGATTGTGATTGTCAACCCCTTGTCTTGTgCGCAGCTTGTCTGACTTGCCTACATATTGTCTGTCATTACGCAACTTAGGAAGTTTGCCTAAA  
CCAGGAGGGTTTCTGGTCATCATGGATatgTTGAAGTgCTCCTACTACATGATTGGGGAACAGAAGTTCTCATCTTTACCTTTGGGCCGTGAAG  
CCGTAGAAGCGGCCGTAAGGAGGCGGGGTACACCATTGAATGGTTCGAGGTTATTTACAGTCTTACAGCTCCACAATGGCAAATtgcGAGGG  
CTTATTTTCGCTGGTGTCTCGCAAACCTGAGTCGTCCTCTTCTCGAGCACCACCACCACCACCTGA

MESGFTSKDITYLSHFNPRDFLEKYYKFGSRHSAESQILKHLKLNLFKIFCLDGVKGDLLIDIGSGPTIYQLLSACESFKEIVVTDYSDQNLQEL  
EKWLKKEPEAFDWSPVVTVYVCDLEGNRVKGPKEEKLKRVQAVKQVLKCDVTQSQPLGAVPLPPADCVLSTLCLCAACPDLPTYCRALRNLGSLK  
PGGFLVIMDKLSSYYMIGEOKFSSPLGREAVEAAVKEAGYTIWFVEVISQSFSSSTMANNEGLFSLVARKLSRPLLEHHHHHH

>v49

ATGGAGAGTGGATTTACGAGTAAGGACACTTATTTGAGTCATTTTAAACCCGCGGACTACTTAGAAAAATACTACAAGTTTGAAGCCGCCATT  
CAGCAGAATCACAAATTTCTGAAACACCTTTTAAAGAACCTGTTTAAAAATCTTCTGTTTAGATGGGGTCAAAGGAGATTTGTTGATTGACATCGG  
ATCAGGTCCCACAATTTACCAACTTCTGTCCGCTTGTGAGAGTTTAAAGGAGATCGTCTGACGGACTATTAGATCAAAATCTGCAAGAAGCTG  
GAGAAATGGTTAAAGAAAGAACCAGAGGCGTTCGATTGGAGCCAGTTGTGACCTATGTCTGTGATCTTGAAGGAAACCCGCTAAAGGGTCTCG  
AAAAGGAGGAAAAGCTGCGCAAAGCCGTAAGCAAGTATTTAAATGTGATGTTACTCAAAGCCAACCATTAGGAGCCGTCCTCCACTGCCCCCGGC  
GGATTGTGATTGTCAACCCCTTGTCTTGTgCGCAGCTTGTCTGACTTGCCTACATATTGTCTGTCATTACGCAACTTAGGAAGTTTGCCTAAA  
CCAGGAGGGTTTCTGGTCATCATGGATgCTCCTACTACATGATTGGGGAACAGAAGTTCTCAcaTTACCTTTGGGCCGTGAAG  
CCGTAGAAGCGGCCGTAAGGAGGCGGGGTACACCATTGAATGGTTCGAGGTTATTTACAGTCTgAGCTCCACAATGGCAAATgCGAGGG  
CTTATTTTCGCTGGTGTCTCGCAAACCTGAGTCGTCCTCTTCTCGAGCACCACCACCACCACCTGA

MESGFTSKDITYLSHFNPRDYLEKYYKFGSRHSAESQILKHLKLNLFKIFCLDGVKGDLLIDIGSGPTIYQLLSACESFKEIVVTDYSDQNLQEL  
EKWLKKEPEAFDWSPVVTVYVCDLEGNRVKGPKEEKLKRVQAVKQVLKCDVTQSQPLGAVPLPPADCVLSTLCLCAACPDLPTYCRALRNLGSLK  
PGGFLVIMDKLSSYYMIGEOKFSSPLGREAVEAAVKEAGYTIWFVEVISQSWSSSTMANAEGFLSLVARKLSRPLLEHHHHHH

>v50

ATGGAGAGTGGATTTACGAGTAAGGACACTTATTTGAGTCATTTTAAACCCGCGGACcACTTAGAAAAAAtCTACAAGTTTGAAGCCGCCATT  
CAGCAGAATCACAAATTTCTGAAACACCTTTTAAAGAACCTGTTTAAAAATCTTCTGTTTAGATGGGGTCAAAGGAGATTTGTTGATGACATCGG  
ATCAGGTCCCACAATTTACCAACTTCTGTCCGCTTGTGAGAGTTTTAAGGAGATCGTCGTGACGGACTATTAGATCAAAATCTGCAAGAACTG  
GAGAAATGGTTAAAGAAAAGAACAGAGGCGTTGATTGGAGCCAGTTGTGACCTATGTCGTGATCTTGAAGGAAACCCGCTAAAGGGTCTCG  
AAAAGGAGGAAAAGCTGCGCAAAGCCGTAAGCAAGTATTTAAATGTGATGTTACTCAAAGCCAACCATTAGGAGCCGCTCCCACTGCCCCCGGC  
GGATTTGTATTGTCAACCCCTTTGCTTGCACGAGCTTGTCTGACTTGCCTACATATTGTCGTGCATTACGCAACTTAGGAAGTTTGCCTAAA  
CCAGGAGGGTTTTCTGGTCATCATGGATGCCTTGAAGcgtTCCTACTACATGATTGGGGAACAGAAGTTCTCATCTTTACCTTTGGGCCGTGAAG  
CCGTAGAAGCGGCCGTAAGGAGGCGGGGTACACCATTGAATGGTTGAGGTTATTTACAGTCTACAGCTCCACAATGGCAAATAACGAGGG  
CTTATTTTCGCTGGTTGCTCGCAAACCTGAGTCGTCTCTTCTCGAGCACACCACCACCACCACCTGA

MESGFTSKDYLHSHFNPRDHLKFKYKFSRHSAESQILKHLKLNFKIFCLDGVKGDLLIDIGSGPTIYQLLSACESFKEIVVTDYSDQNLQEL  
EKWLKKEPEAFDWSVVYVCDLEGNRVKGPKEEKLKQAVKQVLCQVTSQSPQLGAVPLPPADCVLSTLCLHAACPDLPTYCRALRNLGSLLK  
PGGFLVIMDALKRSYIMIGEQKFSLSPLGREAVEAAVKEAGYTIWFVEVISQSYSTMANNEGLFSLVARKLSRPLLEHHHHH

>cthMT

ATGCTTGGTATGGACGCTGATACGGCAAGTTTTTGGGAGGAGAAATATCGTGCAGATTTGACTGCCTGGGACCGTGGCGGCGTATCACCGGCTT  
TGGAACATTTGGCTTGCAGAGGCGCACTGAAGCCCGGCGTATCTTAATTCAGGTTGCGGATACGGGATGAGGTCCTTGCCTTGGCAGCGCG  
TGGATTCGAAGTTTGGGGCTTGGACATCGCCCTTACTCCCGTTTCGCGCTTTCGAAAGAGAAACTGGCTCAGGCAGGTTTAAACAGCCACGCTAGTC  
GAAGGAGACGTTTCGACCTGGCAGCGGAACAACCTTTGATGCGGTTGATGAACAACTTGTTCGCGCTTGTAGTCCAGAGACTGGCCCTC  
GTTATGAGGCACAATTTAGCCGTTGGTTACGTCGCGGCGGTCGCTTTTCGCGCTGTGGATGCAGACCAGCCGCTCTGGAGGACCACCATATCA  
TTGTGGACTTGAAGCCATGCGCTACTGTTTGTCTTAGAACGTTGGCGTGGGTCGAACCCCAACGCACTGTACCCCATCTACTGGTTTT  
TTGAGTATGCTGCCATTTAGAGCGTCTTGTCTGGAACATCATCACCACCATCATTAA

MLGMDADTASFWEKYRADLTAWRDGGVSPALEHHLAEGALKPGRILIPGCGYHEVLALARRGFVWGLDIALTPVRRLLQEKLAQAGLTAHV  
EGDVRTWQPEQPFDAVYEQTCLCALSPEDWPRYEAQLCRWLRPGRLFALWMQDRPGGPPYHCGLEAMRVLFALERWRWVEPPQRTVPHTGF  
FEYAAI LERLVLEHHHHH

>athMT

ATGGCGGAGGAGCAACAAATTCGGATCAGTCCAAATGGTGGTAAATGTGATCCCAACCCCGAGGAAGTAGCAACCTTCTTGCACAAGACAGTCG  
AGGAGGCGCGCTGGGAGAAGTGTGGGAGGAGGAAATACACCATGGGACCAGGTCGCGCCACGCCGTAATCGTGCATTTAGTGGATACATC  
AAGTCTTCCCTTGGCCGCGCATTTGGTCCAGGTTGGTGGCGGACAGATGTCGTAGCCATGGCCTCGCCAGAGCGTTTCTGTGTCGCGCTG  
GATATCTCGGAAAGTGCCTTTCGGAAGGCAAAATGAAACATATGGCAGCTCACCTAAAGCTGAATATTTCTCGTTTGTCAAAGAGGATGTCTTTA  
CCTGGCGTCCCACGAATTTGACTTGAATTTTACTATGTTTTTTTTTGTGCAATGAGCCGGAATGCGTCTGCTGGGTAAGTCCAT  
GTATGAGCTTCTGAAACAGACGCGGAGTTAATCACCTGATGTACCCCATACCCGATCATGTAGGTGGCCCCCATAAAGGTAGATGTAGC  
ACATTCGAGGAAGTGTAGTGCCTATCGGGTCAAAGCAGTGAAGCTTGAAGGAAACCTCACGCAATCCCACAGCAAGGAAAAGAGAAAC  
TTGGTCGCTGGAAAAAATCAATCTGGAACATCATCACCACCATCATTAA

MAEEQQNSDQSNNGNVIPTPEEVATFLHKTVEEGGWEKWEIEITPWDQGRATPLIVHLVDTSSPLGRALVPGCGGGHDVVAMASPERFVVL  
DISESALAKANETYGSSPKAEYFSVKEDVFTWRPELFDLIDYVFFCAIEPEMRPAWAKSMYELLKPDGELITLMYPI TDHVGPPYKVDVS  
TFEEVLVPIGFKAVSVEENPHAIPTRKGEKELGRWKKINLEHHHHH

>aclHMT

ATGTCAACGCCAGTTTAAATCCATCCGGTGTGCACGAAGTATTAGCAAATACAAGACGGTAACTATGTCGACGGGTGGGCCGAAGTGTGGG  
ATAAATCTAAGGTGACCGTCTCCATGGGATCGTGGTTTTCCGAACCTGCGTTGGAAGATACCTGATTCAGAAACGTTGCCATCATCGGAGG  
TCCCTTGGGCCAAGACGCTCAGGGCAAGACATACCGCAAAAAGCTCTGGTCCCAGGCTGCGGTCTGGAGTAGATGTGTTTATTGGCATCG  
TTCGGTTATGACGCTTATGGTTTAGAATACTCTGCAACGGCGGTCGATGATGCCAAGAGGAGCAAGCCAAGAACGGGGATCAATATCTGTAC  
CGGATGCAGAAATCGGCCAGGCAAGATTACGTTCTTCAAGGTGATTTCTTTGAGGACAGTGGCTTGAAGGCTTAACTTACCCTGCAATTTG  
TTTCGAGTTATCTACGACTACAGTTCTTCTGTGATTGAACCCGAGCATGCCCTCAGTGGGCTTTGCGCCATACCCAACCTTCTTGGCGAC  
TCTCCGCGCGGACATTTAATCTGTTTGGAGTTTCCCGCCATAAAGACCTTCTGTACAGGGGCCACCATGGGGCTCGGCGTCAGAAGCCTACC  
GGCCCCATCTGTACATCCAGGGGAGGAAATCCCTACGATGCGTCAGCTCAATGCCAGTTTGCAGCAGCAAAAGCACCCAGTGCAGGAGGCTT  
GGAACGTGTAGCATATTGGCAACCAGAGCGCACGCATGAAGTAGGAAAAACGAGAAAGGTGAGGTTCAAGATCGCGTATCCATCTGGCAGCGT  
CTCCCCAAAGTCCCCTGCTGGAACATCATCACCACCATCATTAA

MSTPSLIPSGVHEVLAKYKDNVVDGWAELWDKSKGDRLPWDRGFPNPALEDTLIQKRAIIGGPLGQDAQGKYRKKALVPGCGRVDVLLLLAS  
FGYDAYGLEYSATAVDVCQEEQAKNGDQYPVRDAEIGQKIFVQGDFFEDTWLEKLNLRNCFDVIYDYTFFCALNPSMRPQWALRHQQLLAD  
SPRHLICLEFPRHKDPSVQGPWPWSASEAYRAHLSHPGEEIIPYDASRQCQFDSKAPSAQGLERVAYWQPERTHEVGNKKEQVQDRVSIWQR  
PQSSLEHHHHH

>bmaHMT

ATGTCTACTGTAGCTAATATCGCTCCCGTATTACGGGCGACTGCAAACTATCCCAACGCCCGAAGAGTGCCTACCTCTTATACAAGGTCG  
TCAATTCGGTGGGTGGGAGAAGTGTGGGTGGAGGAAGTATCCCGTGGGATCTTGGAGTGCTACTCCGTTAGTATTACATCTTGTAAAGAA  
TAACGCCCTGCCAAACCGTAAAGGCTTGTACCAGGATGTGGCGGGGCTATGATGATGTAGTGGCGATGGCAAACCCGAGCGTTTTCATGGTCCGG  
CTGGATAATTAGTGAAGTGTCTTAAGAAGGCCGTTGAACTTCTCGACCATGCCTAATAGTAGCTGCTTACGCTTCGTCAGGAGGATGTCT  
TTACTGGCGTCCAGAGCAACCGTTTGAATTTATTTTCGACTAGTTCCTTTTTCGCGCTATCGACCCCAAAATGCGTCCGGCATGGGGTAAAGC  
CATGTATGAATTAAGGCTGACGGAGGTTAATCAGTGTGATGTATCCAATTAACAACCATGAGGGAGGACCTCCATTCTCTGTGACGGAA  
TCCGAGTACGAAAGGCTTGGTGCCTTGGGTTTAAACAGCTGTCTTGAAGACTACAGTATCTTCCCGTGAACCTCGTAAGGGCAAGG  
AGAAGTTGGCCGTTGGAAGAAAATGAACAACCTGGAACATCATCACCACCATCATTAA

MSTVANIAPVFTGDKTIPTPEECATFLYKVVNSGGWEKWEIEIIPWDLGVPTPLVHLVKNALPNGKGLVPGCGGGYDVVAMANPERFMVG  
LDISENALKKARETFSTMPNSSCFSVKEDVFTWRPEQPFDFIDYVFFCAIDPKMRPAWGKAMYELLKPDGELITLMYPI TNHEGGPPFSVSE  
SEYEKVLVPLGFKQLSLEDYSDLAVEPRKGEKELARWKKMNNLEHHHHH

>bxeHMT

ATGTCCGACCCGACCCAACTGCCGTTCCAGATTTTCGAAACCCGTGATCCCAATTCCCCTGCCTTCTGGGATGAGCGTTTCGAGCGTCGCTTTA  
CACCTTGGGACCAGGCCGGAGTTCCTGCGGCTTTTCAGTCTTTTGCAGCGCGCCATTCAGGCGCTGCTGTATTGATCCCTGGTTGTGGTTCTGC  
CTATGAGGCCGTGTGGTTAGCCGGGCAGGGAAACCCCTGTTCCGCTATCGATTTTTCACCTGCTGCTGTAGCGGCAGCACATGAACAGTTAGGG  
GCGCAGCACGCGCAGTTAGTGGAGCAAGCTGATTTTTTCACGTATGAACCGCCGTTTACACCTGCTTGGATTTATGAGCGCGCATTTCTGTGTG  
CATTGCCCTTAGCGCGTCGCGCCGACTATGCCACCCGATGGCAGATCTTCTGCCGGGCGGTGCTTTATTAGCCGGCTTTTTCTTCTTGGTGC  
AACTCCCAAAGGACCACCGTTTTGGAATCGAGCGTGCAGAGCTGGACGCATTGTTAACTCCATACTTCGACCTTATTGAAGACGAGGCAGTCCAC  
GACTCCATCGCGGTTTTTGTGGACGTGAGCGCTGGTTGACATGGCGCCGCCGCCCTGGAACATCATCACCACCATCATTA

MSDPTQPAVPDFETRDPNSPAFWDERFERRFTPWDQAGVPAAFQSFARHSGAAVLI PGCGSAYEAVWLAGQGNPVRAIDFSPA AVAAAHEQLG  
AQHAQLVEQADFFTYEPFPTPAWIYERAFLCALPLARRADYAHRMADLLPGGALLAGFFFLGATPKGPPFGIERAELDALLTPYFDLIEDEAVH  
DSIAVFAGRERWLTWRRRALEHHHHHH

>selHMT

ATGACTAATGCCGTTAACCAAGCTCAATTTTGGGAGCAGCGTTATCAAGAAGGGTCCGATCGTTGGGACCTTGGGCAGGCGCGCCTGTCTGGC  
GTTCACTTTTGGCGGGGACTAATGCCCCGGCACCTGGTCGCATTGCAGTATTAGGCTGTGGACGCGGTCACGATGCTCGCTTATTGCCGAGCA  
AGGCTTCGAGGTTGTTCGGCTTTGACTTTGCGCCATCCGCCATTGCCCGCAGCACAAAGCGTTGGCCAGGGAACACAGCGCAGTTTCTTCAGCGT  
GATATTTTGCCTGCCTCAAGAATTCGCGGGTCAGTTCGACACTGTTCTGGAGCATAACATGCTTTTGGCCATTGATCTGACCGCCGTGCCG  
AGTATGTTGAGGTTGTGCGCCAAATTTTGAACCTAAGGGGTGCCTTCTGGCTGTTTTGGTGTTCATGATCGTCCGTCGCGCCCTCCCTATGG  
ATGTTCTTTAACAGAACTGCGCGATCGTTTCGCTCAGGGCTGGCAAGAAGAGCAGTTAGAATCTGTACAGAAATCCGTGGAGGGTCGCCGTGGT  
GAGGAATACTTGGGACGTGGCGTCGTCTGGATCTGGAACATCATCACCACCATCATTA

MTNAVNQAQFWEQRYQEGSDRWDLGQAAPVWRSLLAGTNAPAPGRIAVLGCGRGHDARLFAEQGFVVGDFDFAPSIAIAAQAQAQGTTAQFLQR  
DIFALPQEFAGQFDTVLEHTCFCAIDPDRRAEYVEVVRQILKPKGCLLGLFWCHDRPSGPPYGC SLTEL RDRFAQGWQEQLSVTESVEGRRG  
EYLRWRRLDLEHHHHHH

## X. References

- [1] D. G. Gibson, L. Young, R.-Y. Chuang, J. C. Venter, C. A. Hutchison, H. O. Smith, *Nat. Methods* **2009**, *6*, 343–345.
- [2] A. Aiyar, Y. Xiang, J. Leis, *Methods Mol. Biol.* **1996**, *57*, 177–191.
- [3] T. Baba, T. Ara, M. Hasegawa, Y. Takai, Y. Okumura, M. Baba, K. A. Datsenko, M. Tomita, B. L. Wanner, H. Mori, *Mol. Syst. Biol.* **2006**, *2*, 2006.0008.
- [4] O. Khersonsky, R. Lipsh, Z. Avizemer, Y. Ashani, M. Goldsmith, H. Leader, O. Dym, S. Rogotner, D. L. Trudeau, J. Prilusky, P. Amengual-Rigo, V. Guallar, D. S. Tawfik, S. J. Fleishman, *Mol. Cell.* **2018**, *72*, 178–186.
- [5] N. J. P. Broom, J. S. Elder, P. C. T. Hannan, J. E. Pons, P. J. O’Hanlon, G. Walker, J. Wilson, P. Woodall, *J. Antibiot. (Tokyo)*. **1995**, *48*, 1336–1344.
- [6] O. Ovadia, S. Greenberg, J. Chatterjee, B. Laufer, F. Opperer, H. Kessler, C. Gilon, A. Hoffman, *Mol. Pharm.* **2011**, *8*, 479–487.
- [7] A. Gutmann, C. Krump, L. Bungarung, B. Nidetzky, *Chem. Commun.* **2014**, *50*, 5465–5468.
- [8] L. A. Wessjohann, J. Keim, B. Weigel, M. Dippe, *Curr. Opin. Chem. Biol.* **2013**, *17*, 229–235.
- [9] M. D. Shepherd, T. Liu, C. Méndez, J. A. Salas, J. Rohr, *Appl. Environ. Microbiol.* **2011**, *77*, 435–441.
- [10] L. a Wessjohann, B. Sontag, *Angew. Chem. Int. Ed.* **1996**, *35*, 1697–1699.
- [11] J. D. Rudolf, C. D. Poulter, *ACS Chem. Biol.* **2013**, *8*, 2707–2714.
- [12] C. Dürr, D. Hoffmeister, S. E. Wohlert, K. Ichinose, M. Weber, U. Von Mulert, J. S. Thorson, A. Bechthold, *Angew. Chem. Int. Ed.* **2004**, *43*, 2962–2965.
- [13] M. Mittler, A. Bechthold, G. E. Schulz, *J. Mol. Biol.* **2007**, *372*, 67–76.
- [14] T. D. Huber, B. R. Johnson, J. Zhang, J. S. Thorson, *Curr. Opin. Biotechnol.* **2016**, *42*, 189–197.
- [15] M. Thomsen, S. B. Vogensen, J. Buchardt, M. D. Burkart, R. P. Clausen, *Org. Biomol. Chem.* **2013**, *11*, 7606–7610.
- [16] S. Mordhorst, J. Siegrist, M. Müller, M. Richter, J. N. Andexer, *Angew. Chem. Int. Ed.* **2017**, *56*, 4037–4041.
- [17] A. J. Herbert, S. A. Shepherd, V. A. Cronin, M. R. Bennett, R. Sung, J. Micklefield, *Angew. Chem. Int. Ed.* **2020**, anie.202004963.
- [18] C. Liao, F. P. Seebeck, *Nat. Catal.* **2019**, *2*, 696–702.
- [19] H. S. Loring, P. R. Thompson, *Biochem.* **2018**, *57*, 5524–5532.
- [20] S. P. Ivonin, B. B. Kurpil’, E. B. Rusanov, O. O. Grygorenko, D. M. Volochnyuk, *Tetrahedron Lett.* **2014**, *55*, 2187–2189.

- [21] W. Li, D. Yuan, G. Wang, Y. Zhao, J. Xie, S. Li, C. Zhu, *J. Am. Chem. Soc.* **2019**, *141*, 3187–3197.
